# Supplementary material
Source: PubMed Central journal article supplement (PMC6745256)

**Supplemental Figure 6. Contributions of sex and ancestry to variation in points of departure.** For each chemical, four phenotypes are displayed: Beats per Minute (BPM), Decay Rise Ratio, Peak Spacing Coefficient of Variation (CV), and Total Cells. For each phenotype, the left panel shows box plots of the points of departure (PODs) across donors separated by sex; middle panel shows box plots of the PODs across donors separated by ancestry (Af/AA = African or African American, As = Asian, E = European, H/L = Hispanic/Latino, M\_Af/E = mixed African and European); the right panel shows the percent contribution of ancestry, sex, and residual variance to the overall variation in the PODs, based on linear mixed effects modeling. In the right panels, an asterisk “\*” indicates the linear mixed effects model did not converge (occurred for <10% of chemicals/phenotypes).

# mifepristone 1

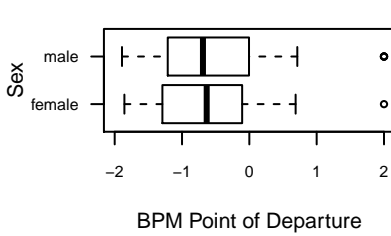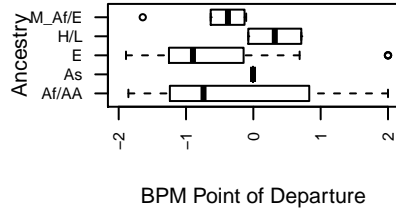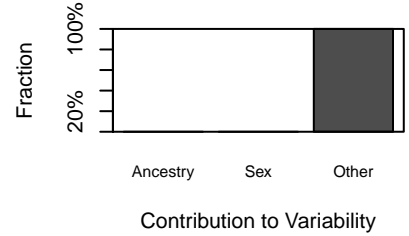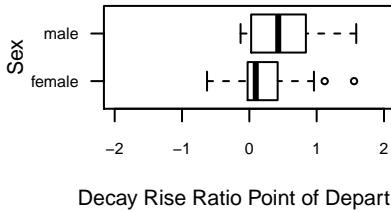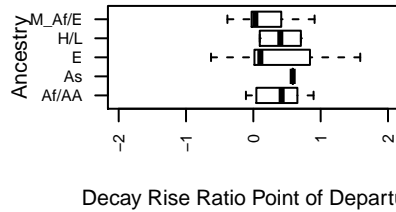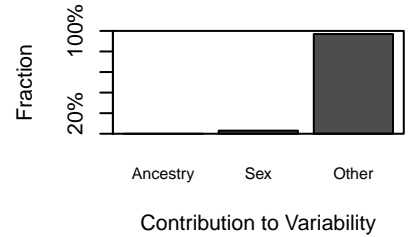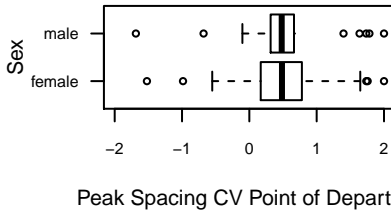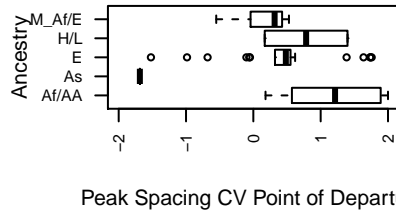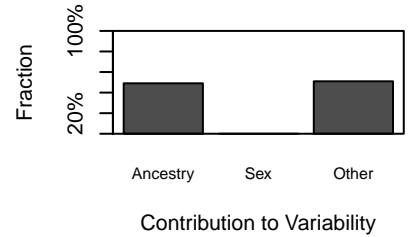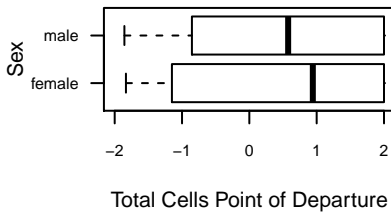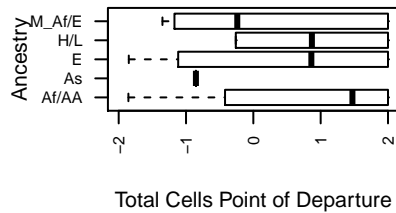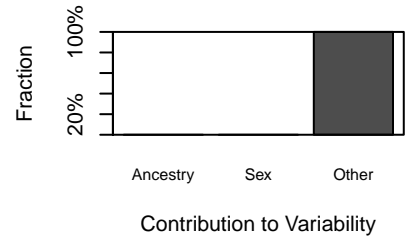

# N-acetylprocainamide 2

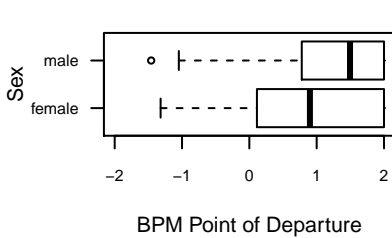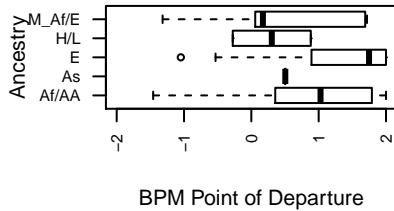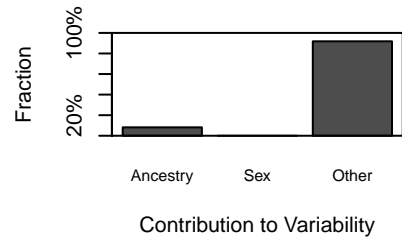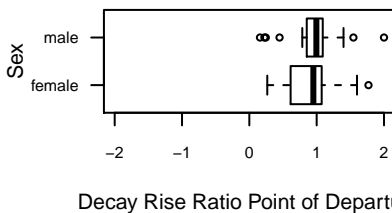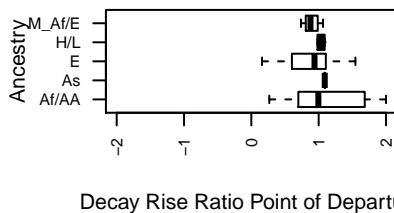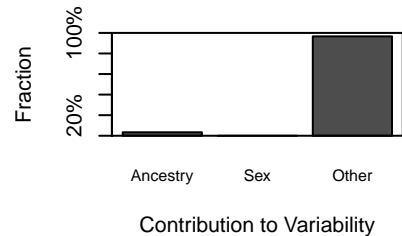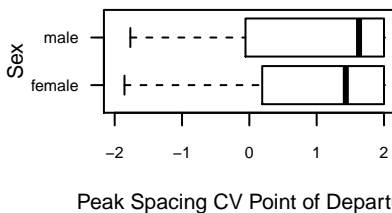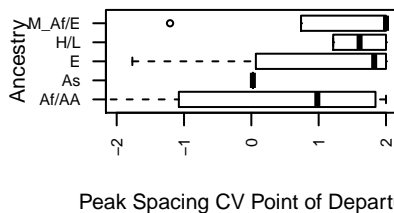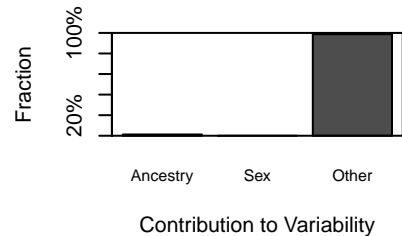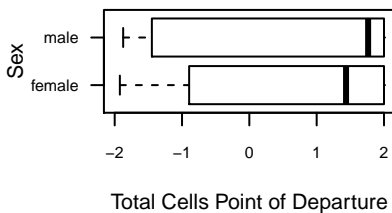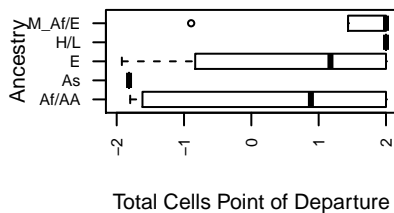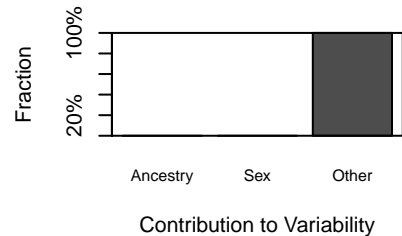

# Propafenone 3

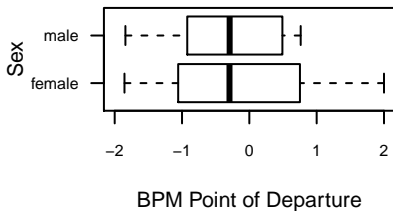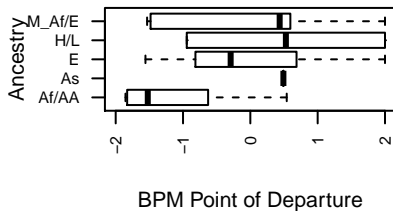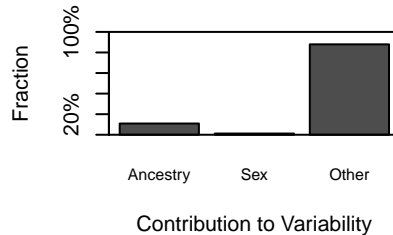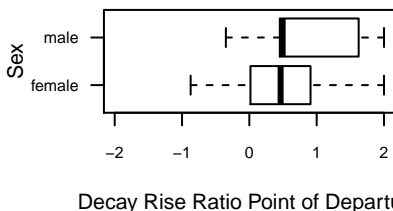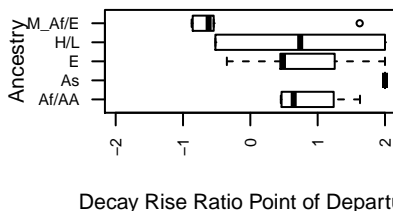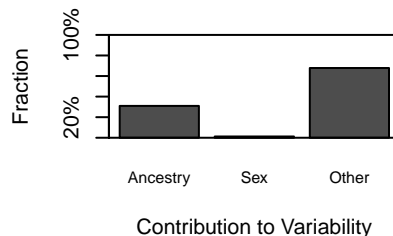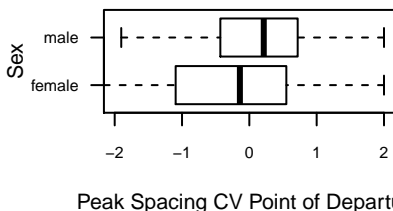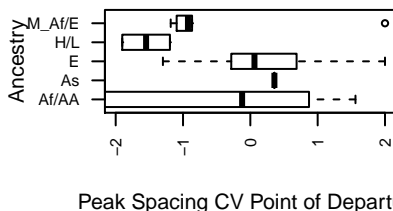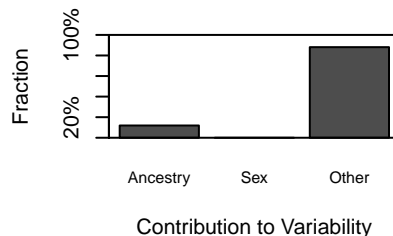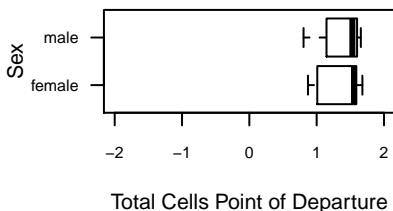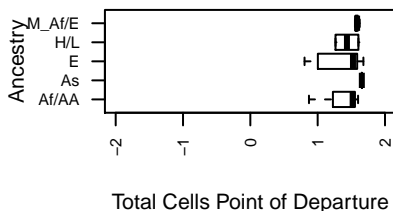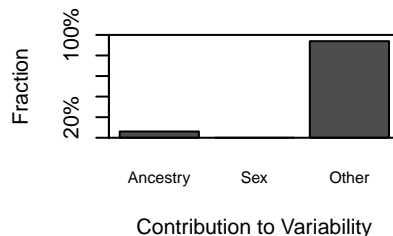

# bepridil\_hydrochloride 4

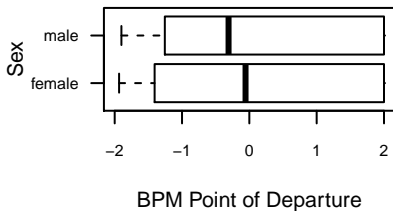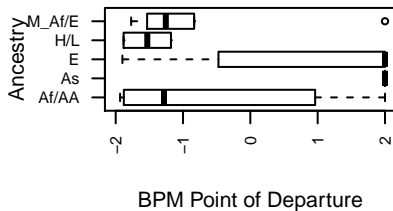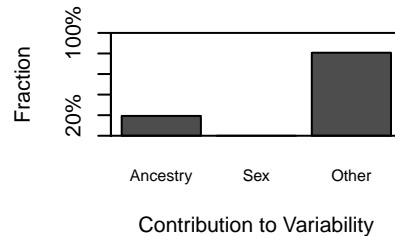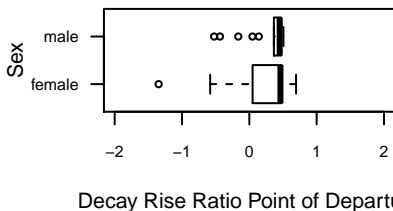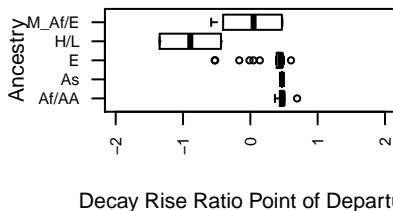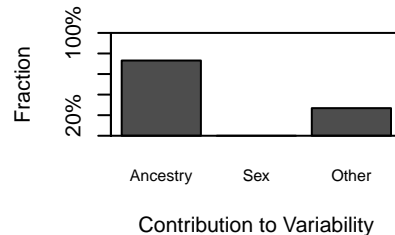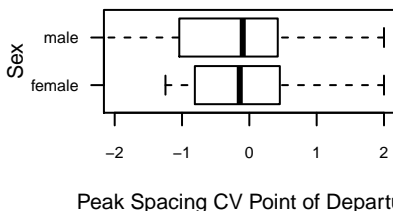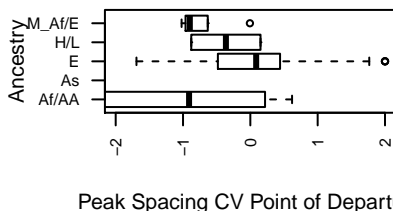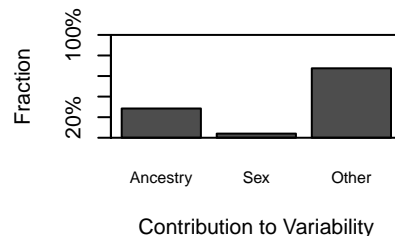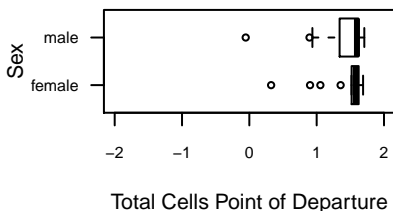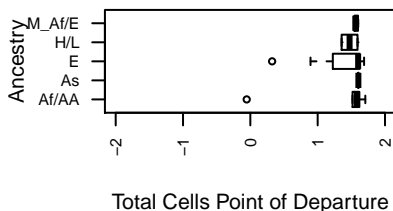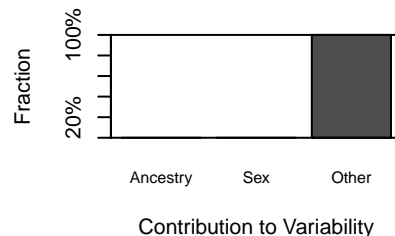

# citalopram\_hydrobromide 5

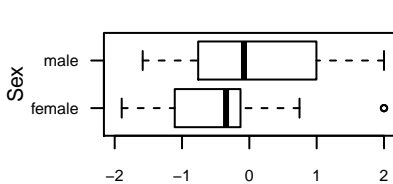

BPM Point of Departure

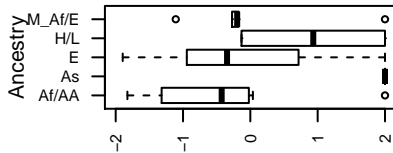

BPM Point of Departure

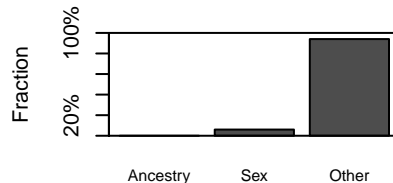

Contribution to Variability

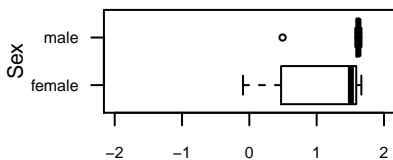

Decay Rise Ratio Point of Departure

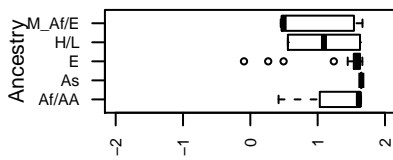

Decay Rise Ratio Point of Departure

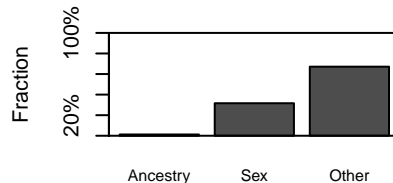

Contribution to Variability

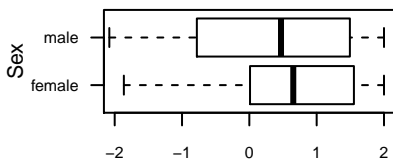

Peak Spacing CV Point of Departure

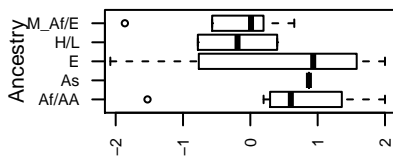

Peak Spacing CV Point of Departure

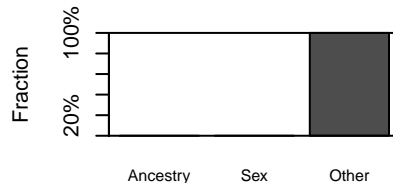

Contribution to Variability

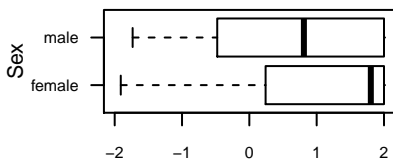

Total Cells Point of Departure

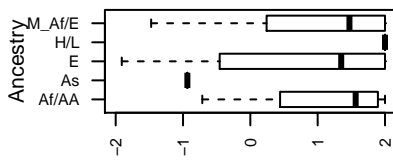

Total Cells Point of Departure



Contribution to Variability

# disopyramide\_phosphate 6

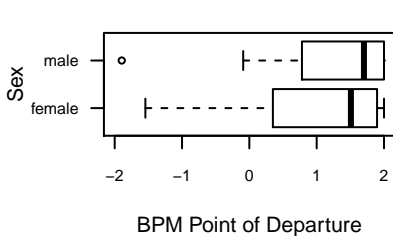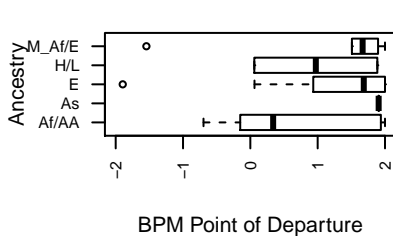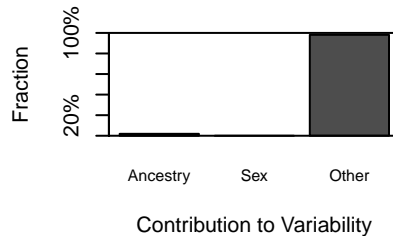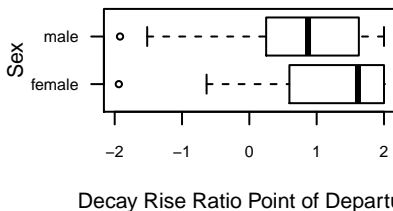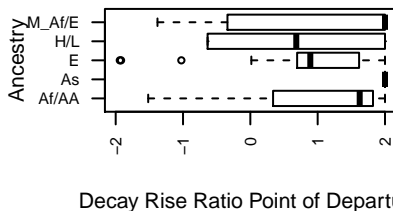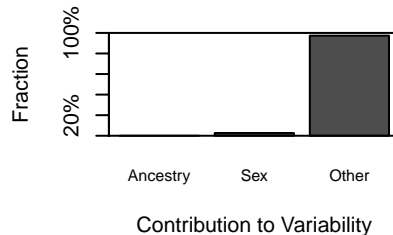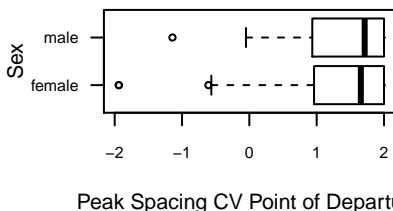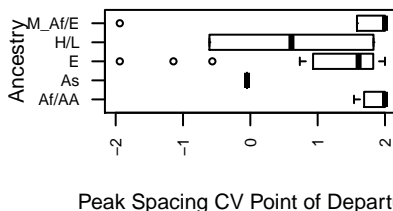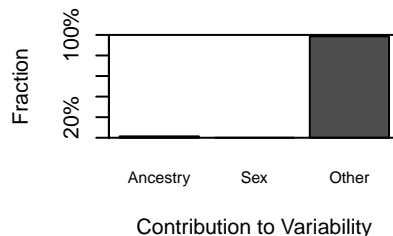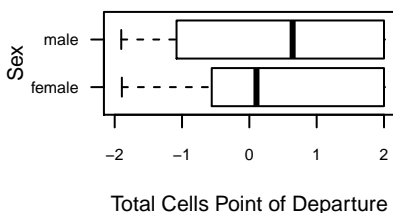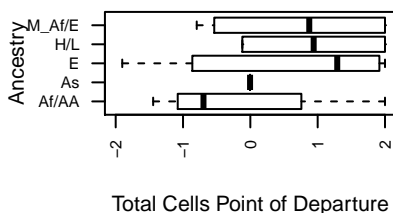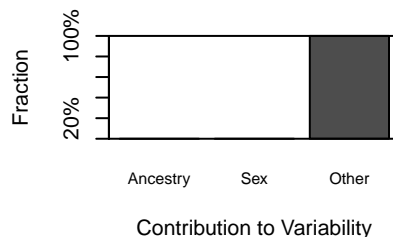

# Tartaric\_acid 7

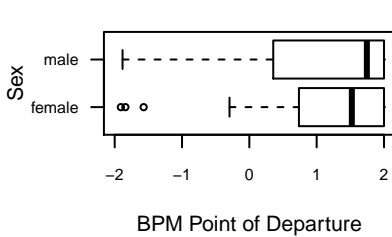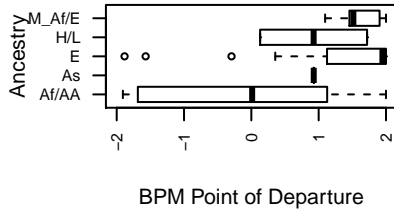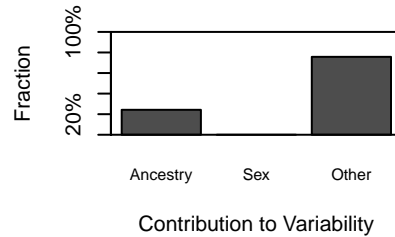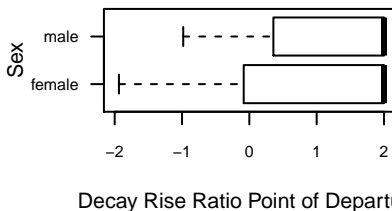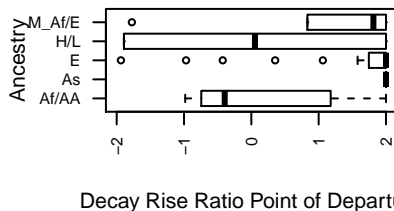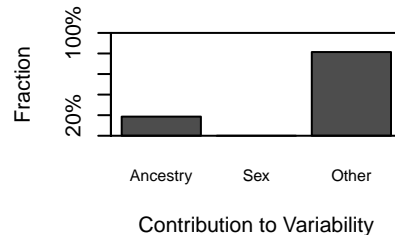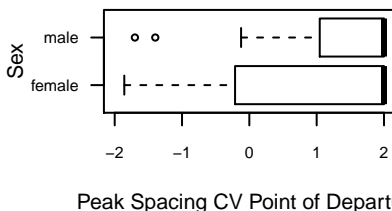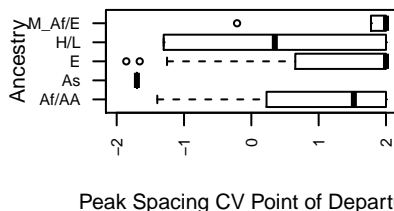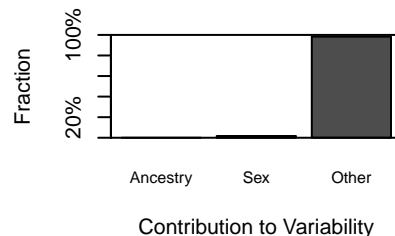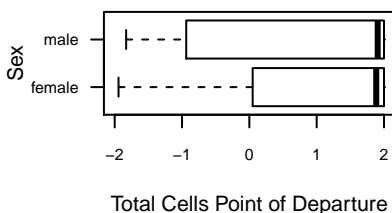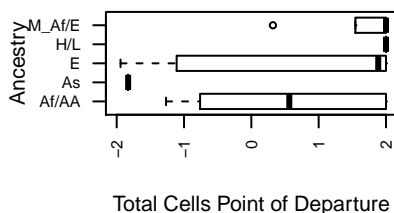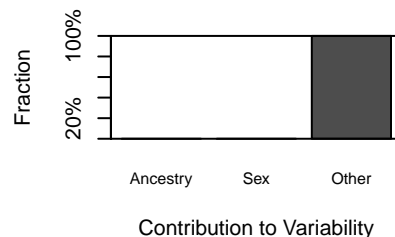



# Glucono-d-lactone 8

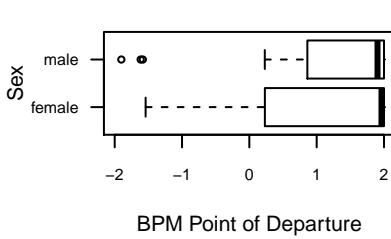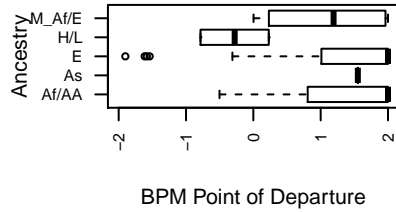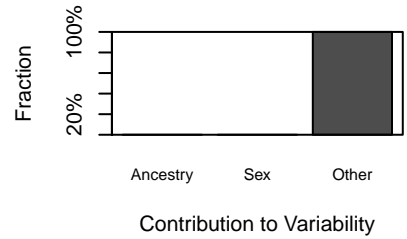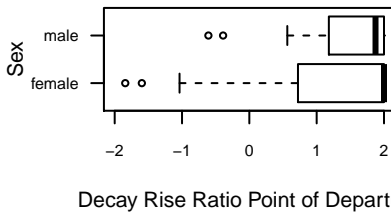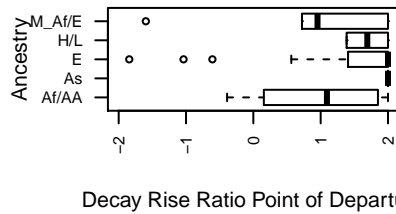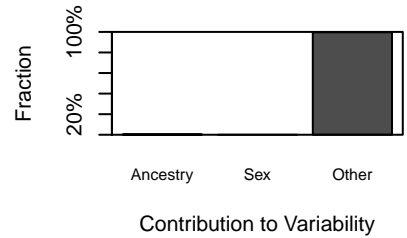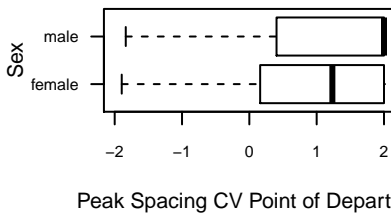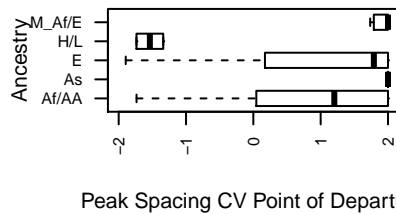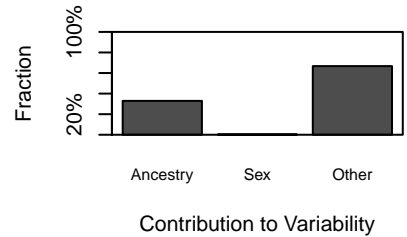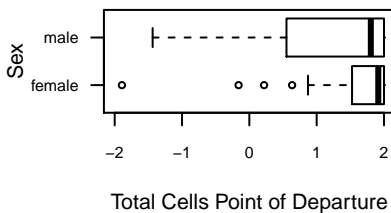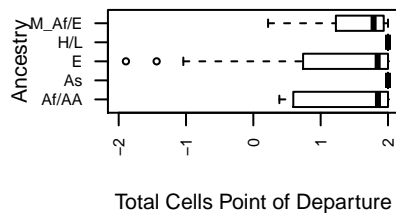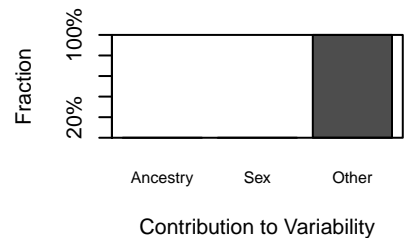

# Xylitol 9

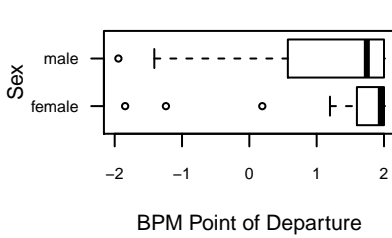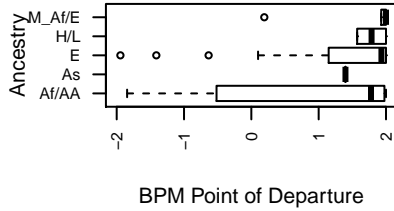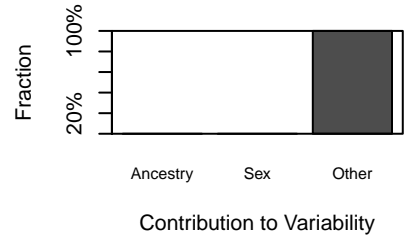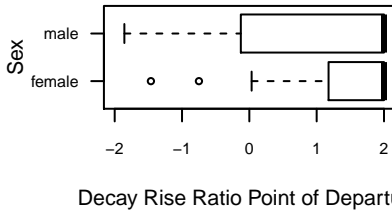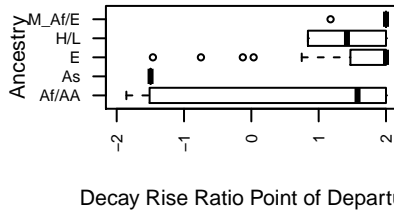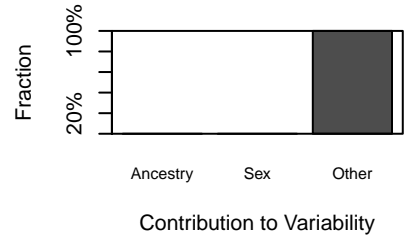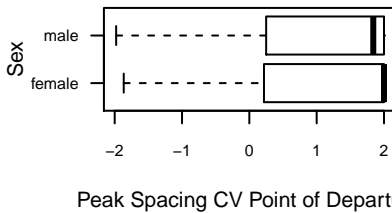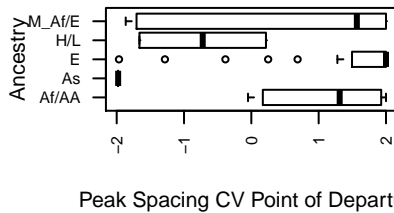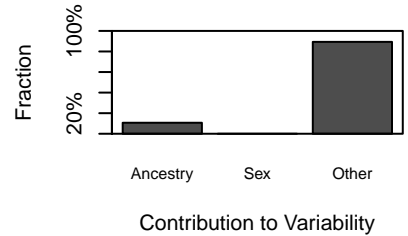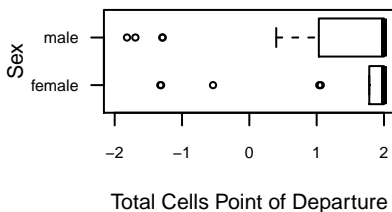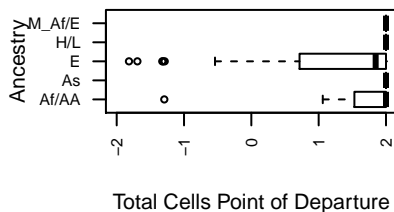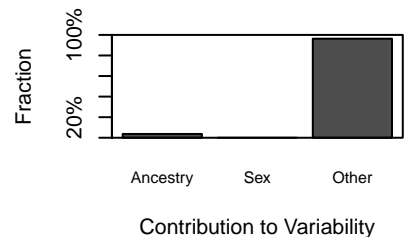

# Leucine 10

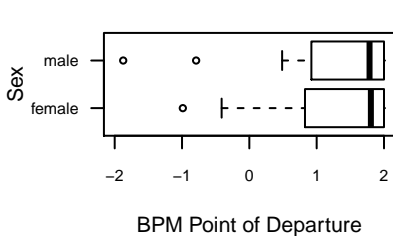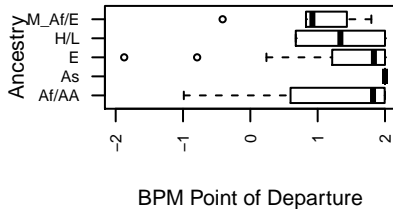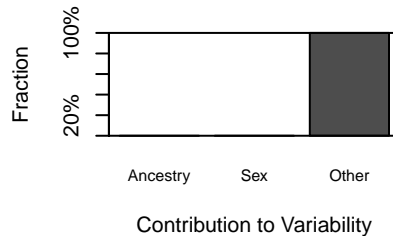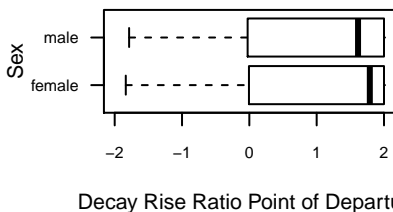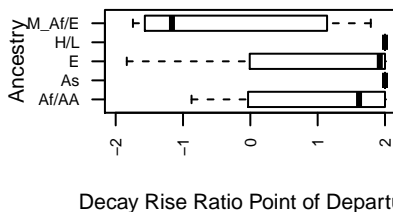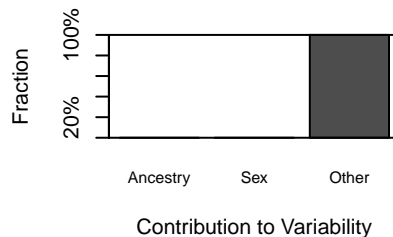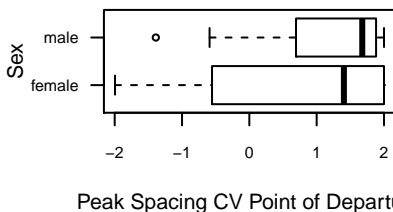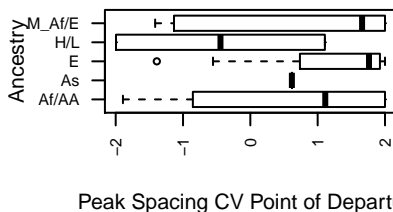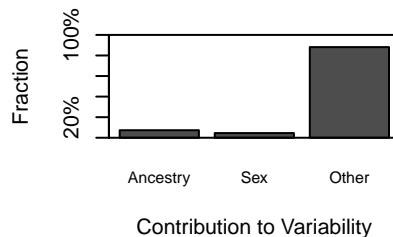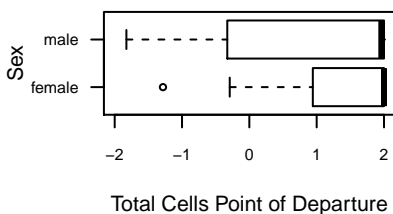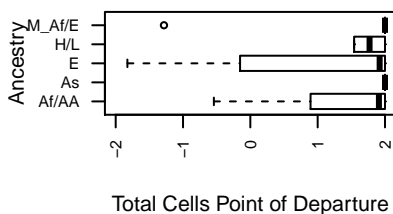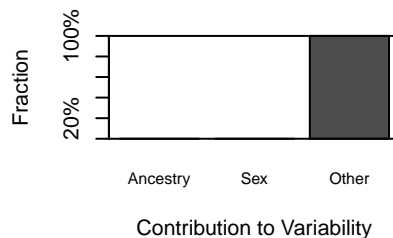

# 3,4-Dichlorophenyl\_isocyanate 11

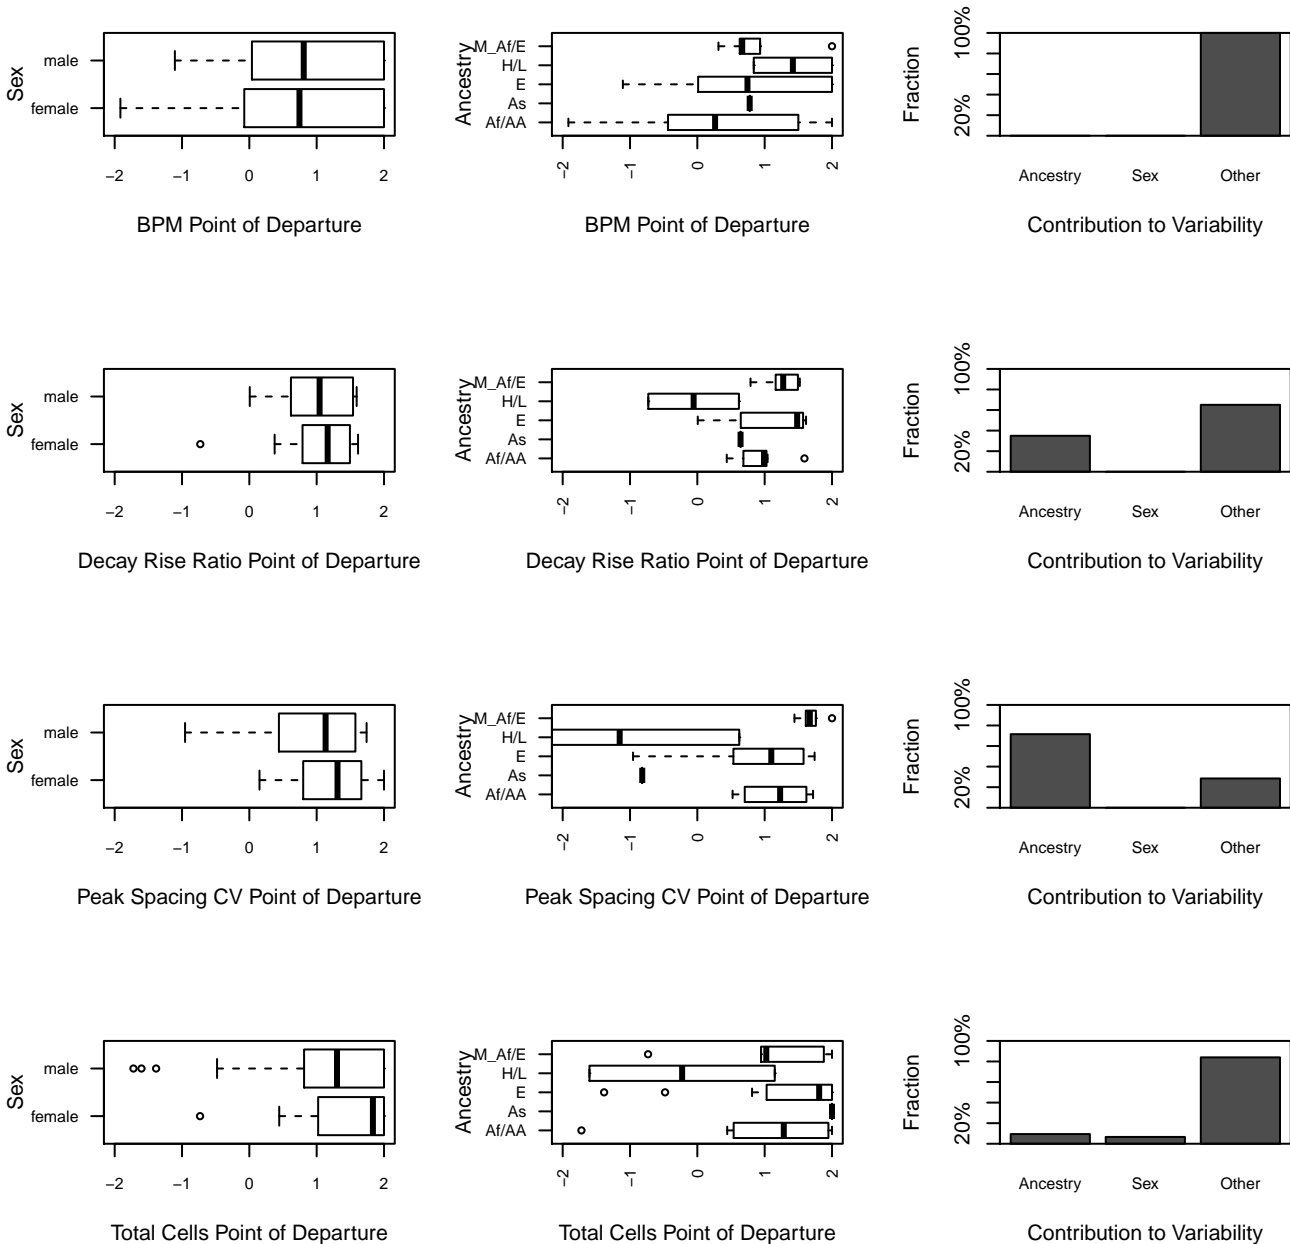

# vernacalant 12

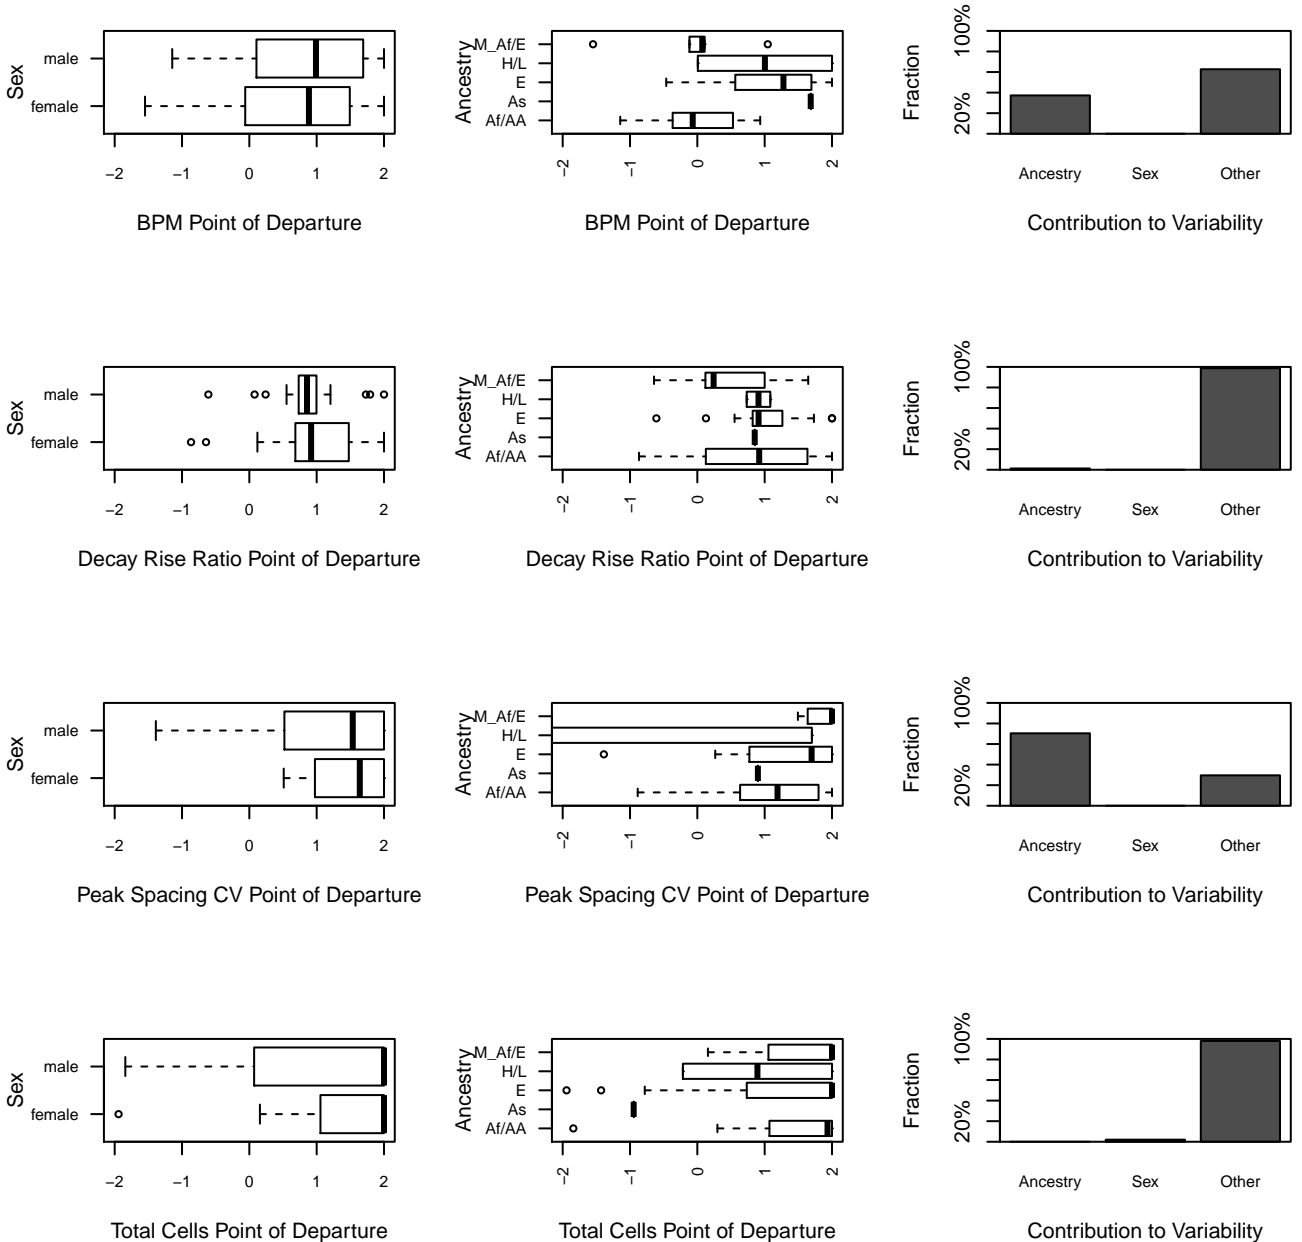

# 1-Methyl-Alpha-Ionone 13

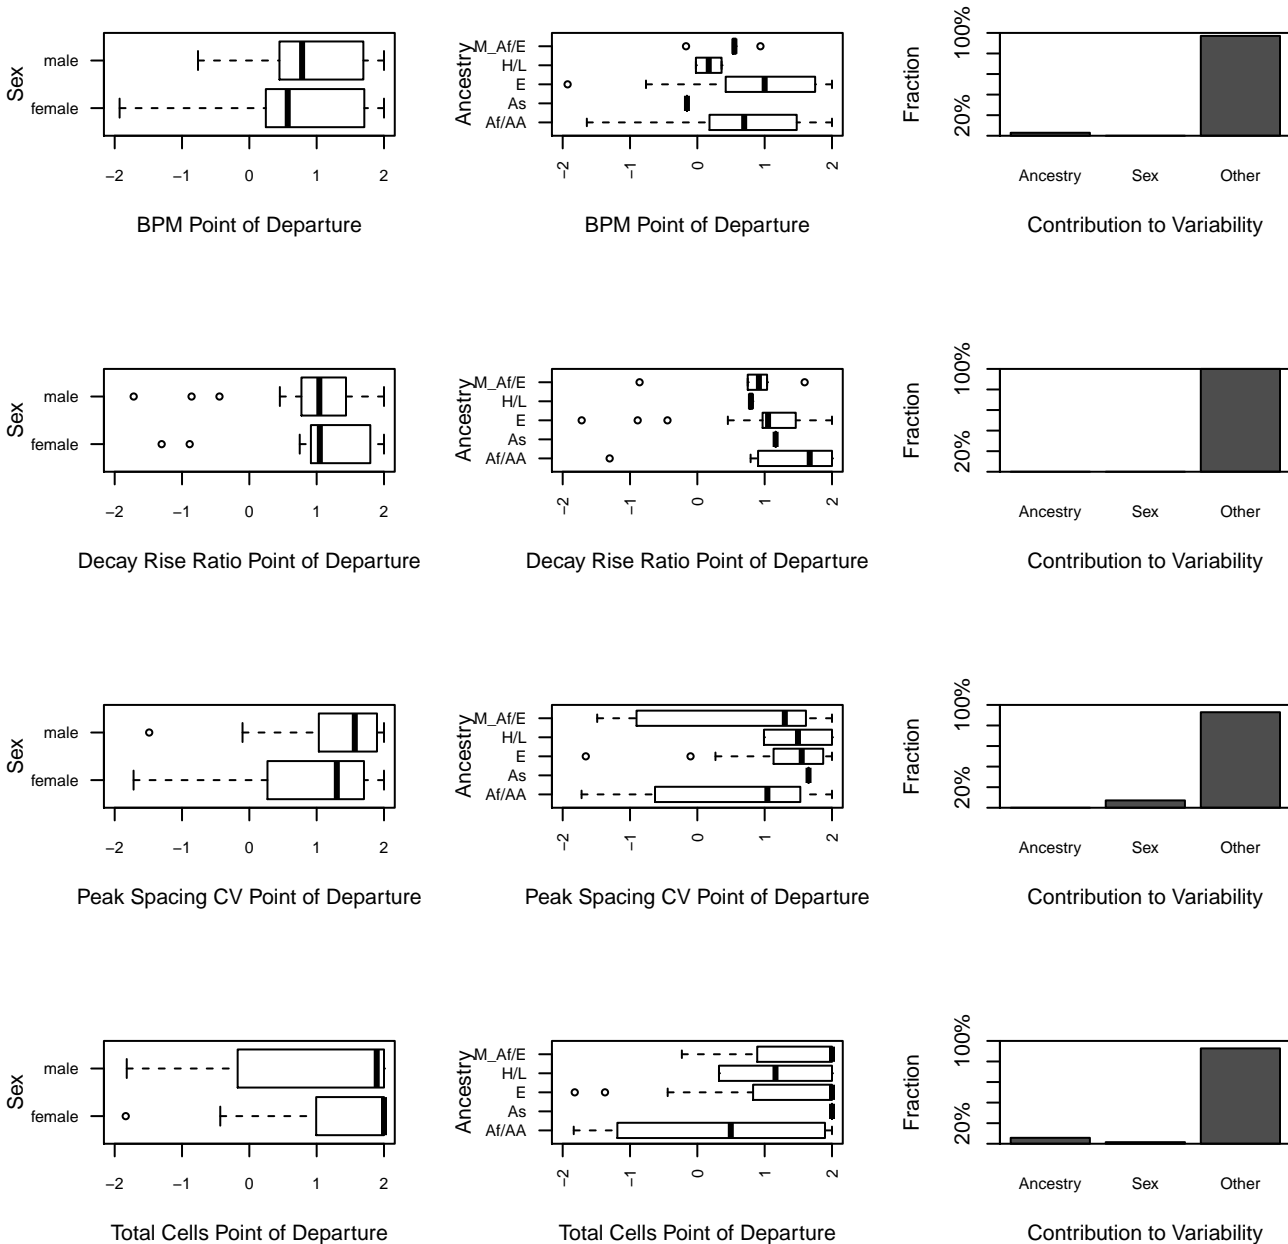

# lamotrigine 14

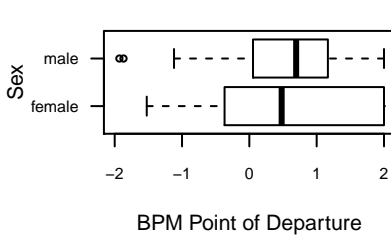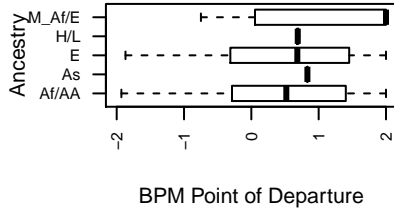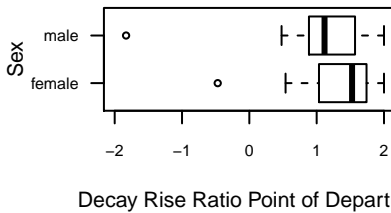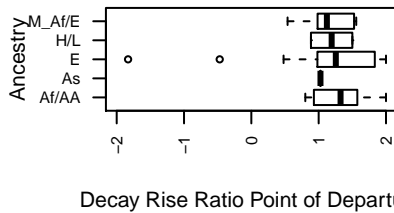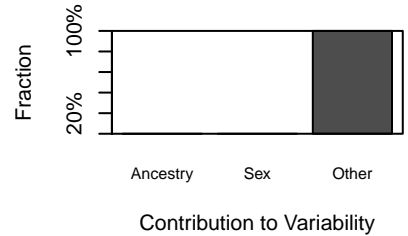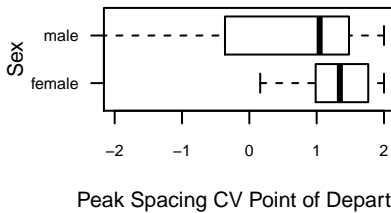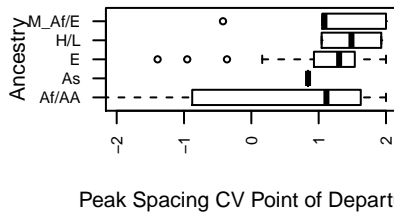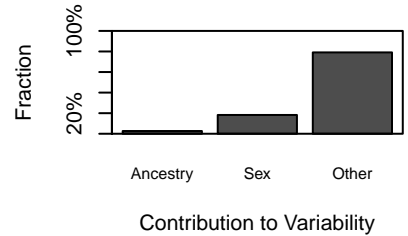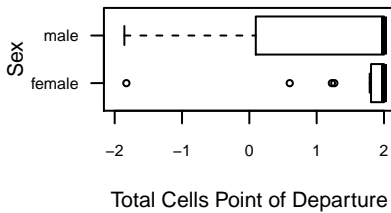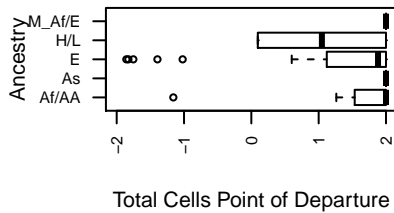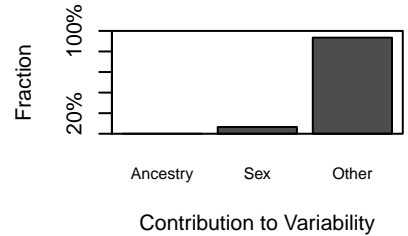

# dofetilide 15

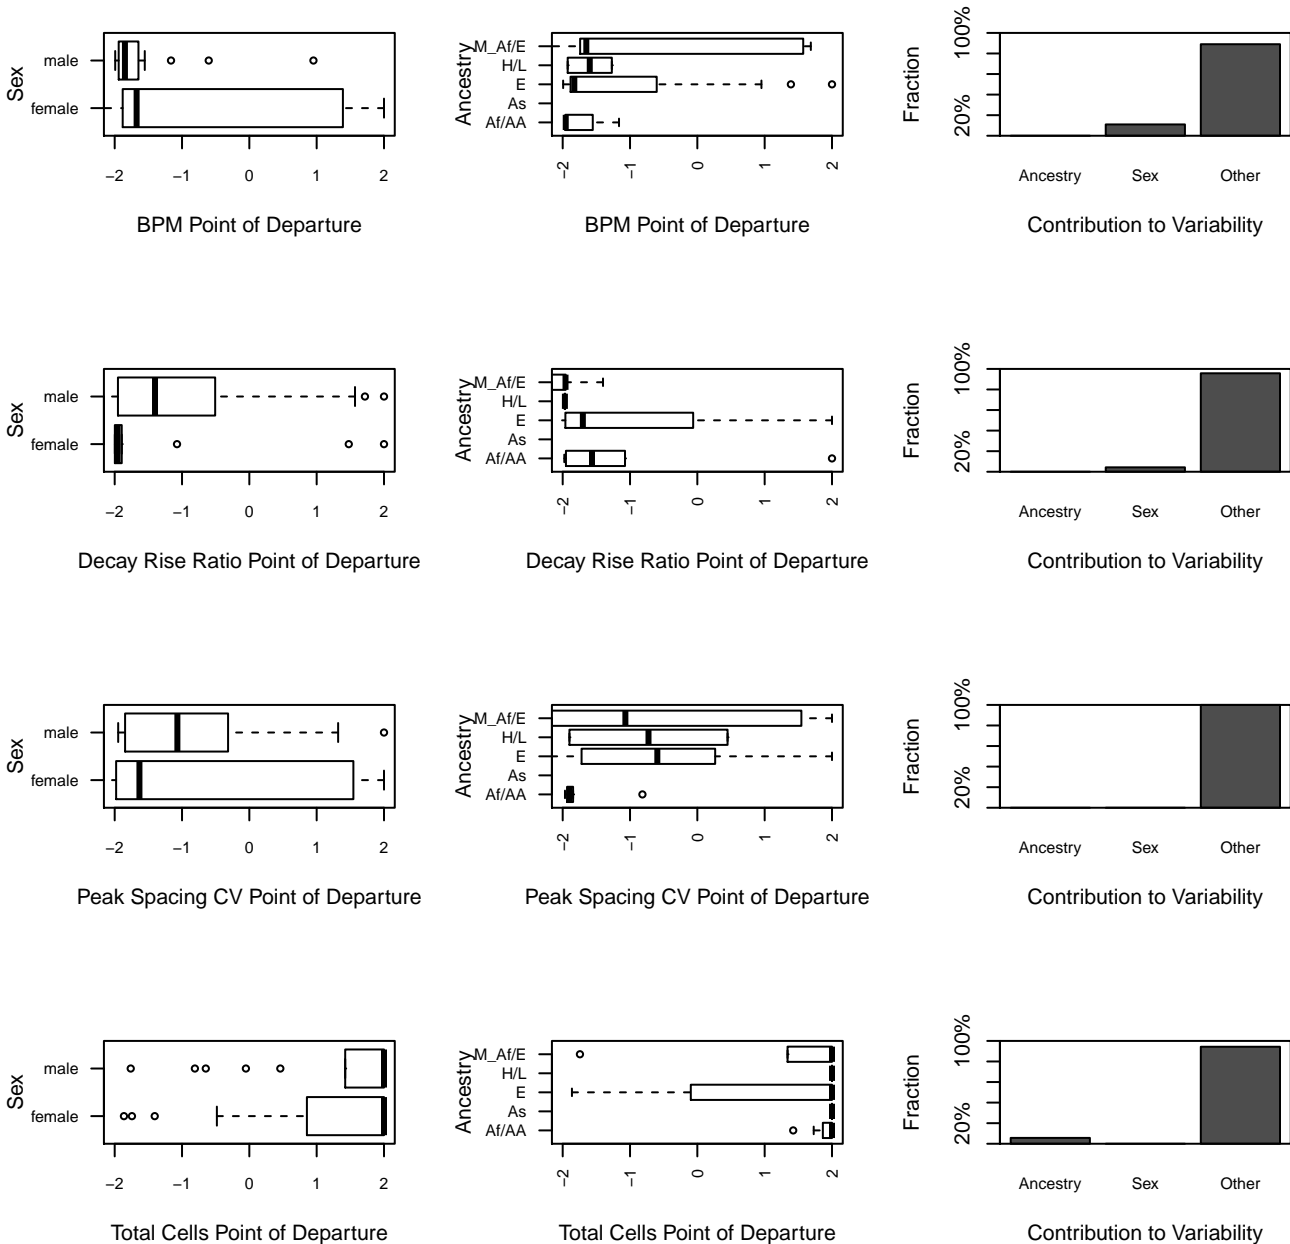



# diltiazem 16

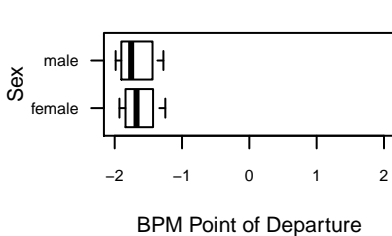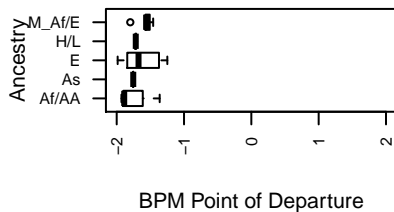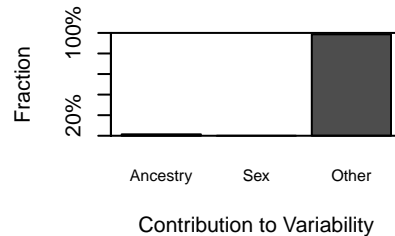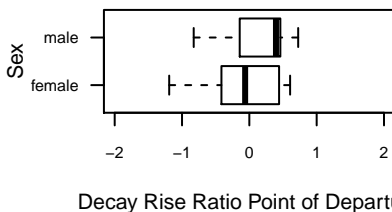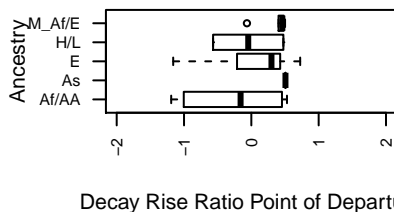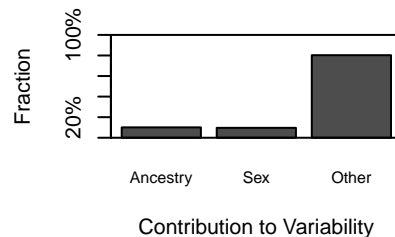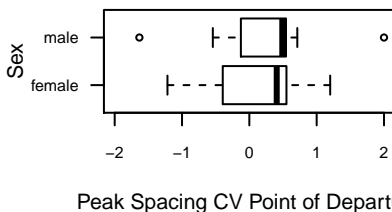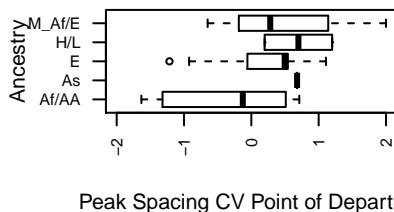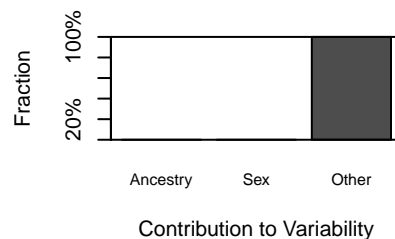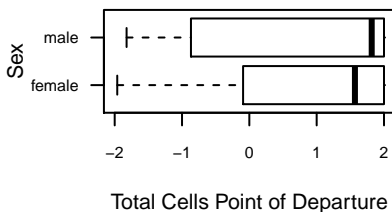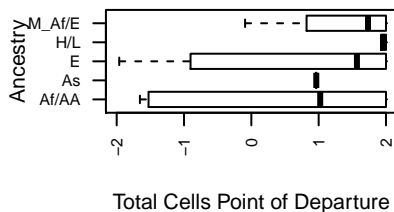

# cisapride\_monohydrate 17

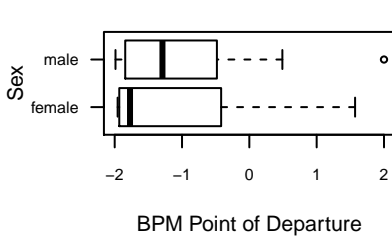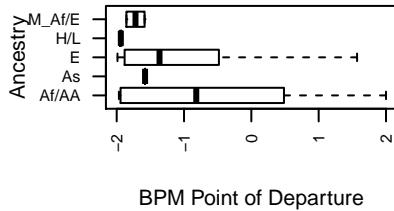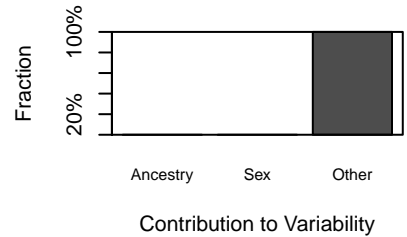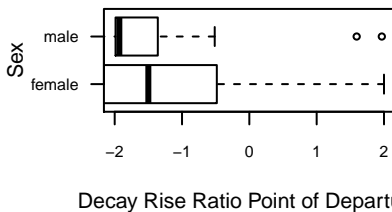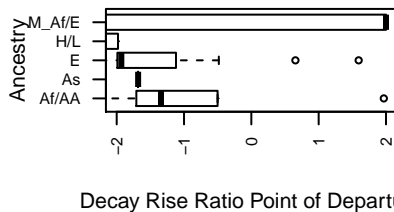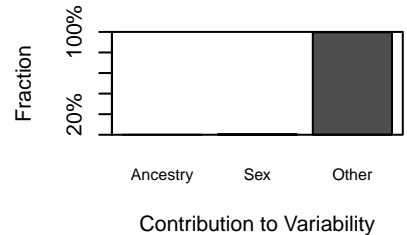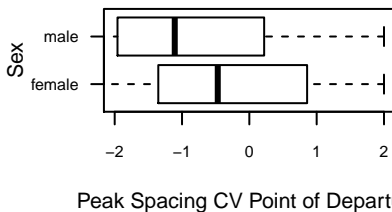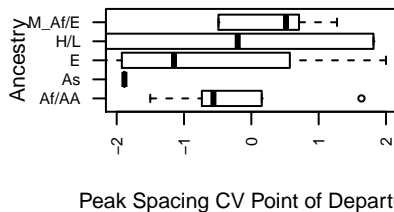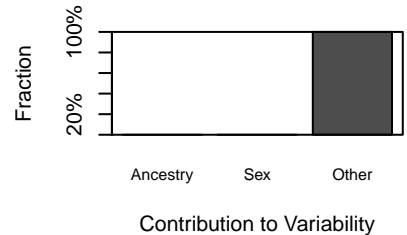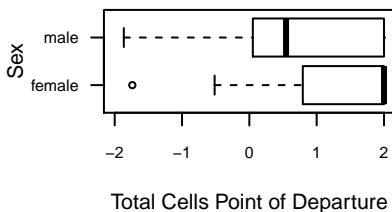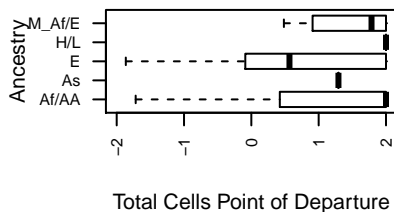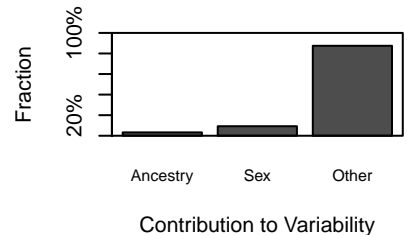

# ranolazine 18

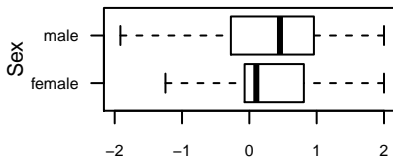

BPM Point of Departure

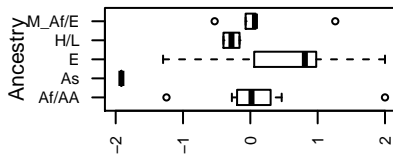

BPM Point of Departure

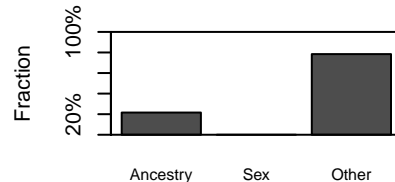

Contribution to Variability

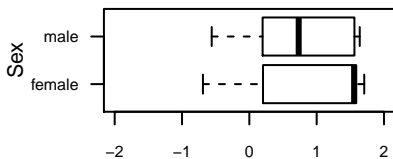

Decay Rise Ratio Point of Departure

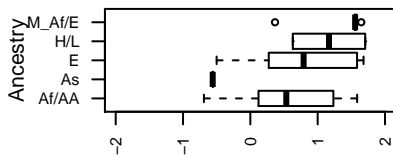

Decay Rise Ratio Point of Departure

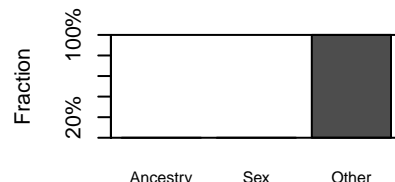

Contribution to Variability

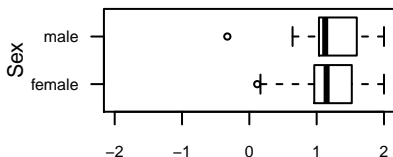

Peak Spacing CV Point of Departure

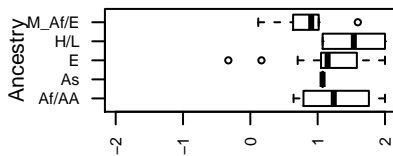

Peak Spacing CV Point of Departure

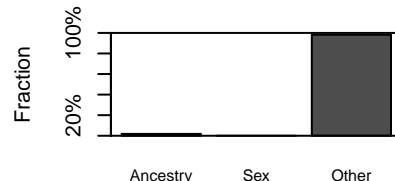

Contribution to Variability

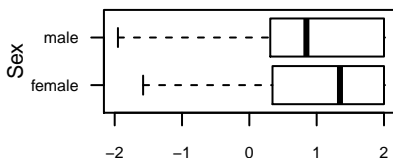

Total Cells Point of Departure

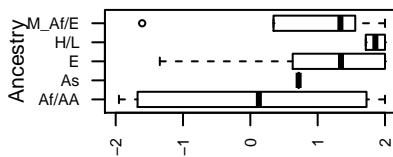

Total Cells Point of Departure

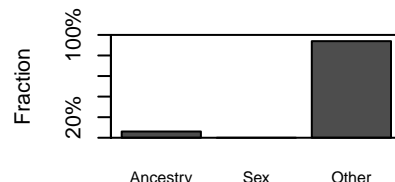

Contribution to Variability

# loratadine 19

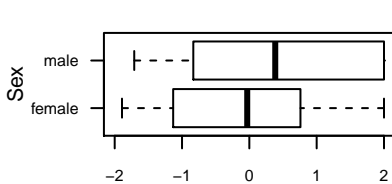

BPM Point of Departure

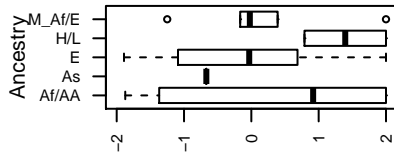

BPM Point of Departure

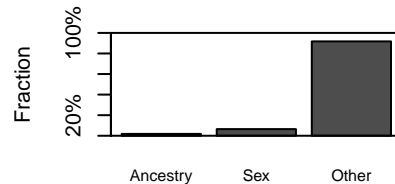

Contribution to Variability

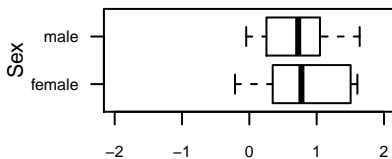

Decay Rise Ratio Point of Departure

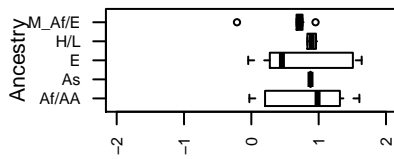

Decay Rise Ratio Point of Departure

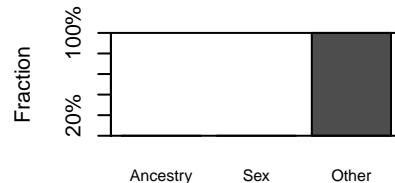

Contribution to Variability

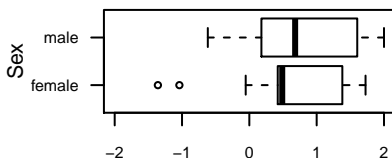

Peak Spacing CV Point of Departure

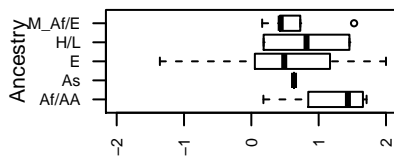

Peak Spacing CV Point of Departure

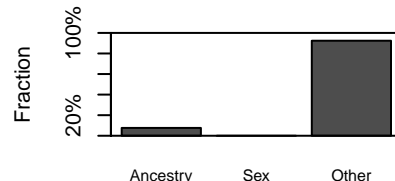

Contribution to Variability

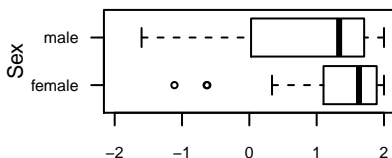

Total Cells Point of Departure

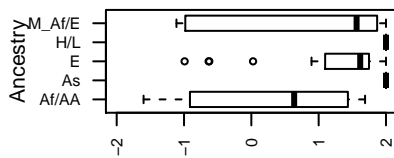

Total Cells Point of Departure

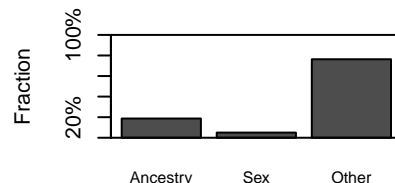

Contribution to Variability

# ibutilide\_fumarate 20

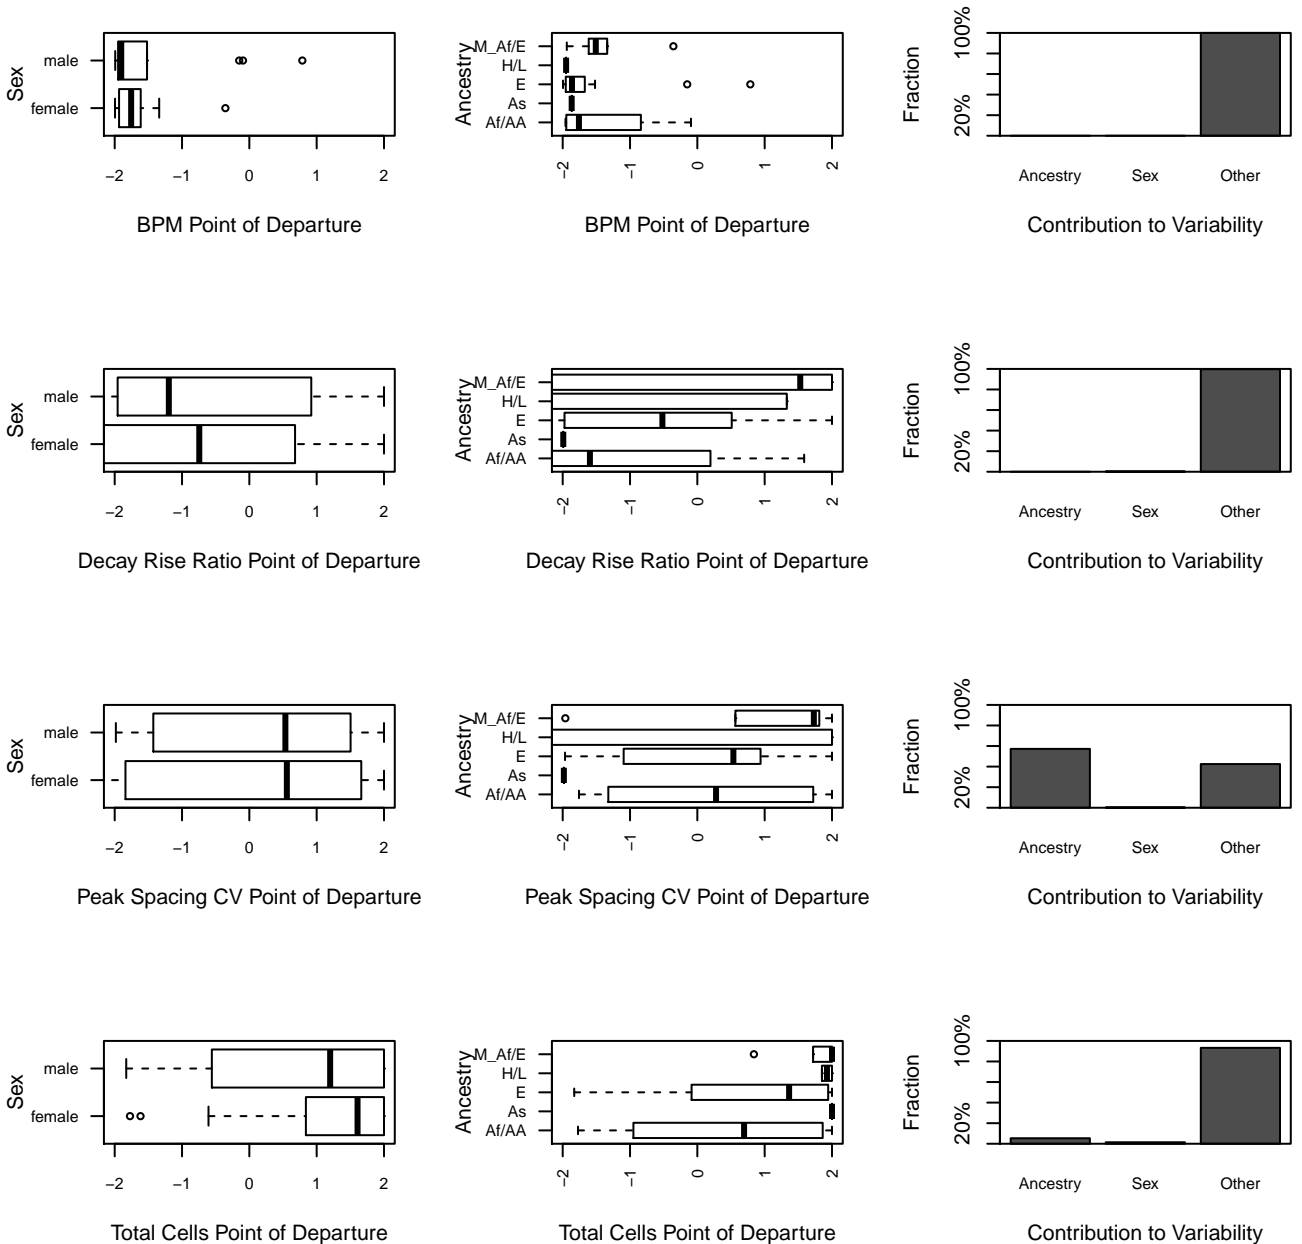

# cabazitaxel 21

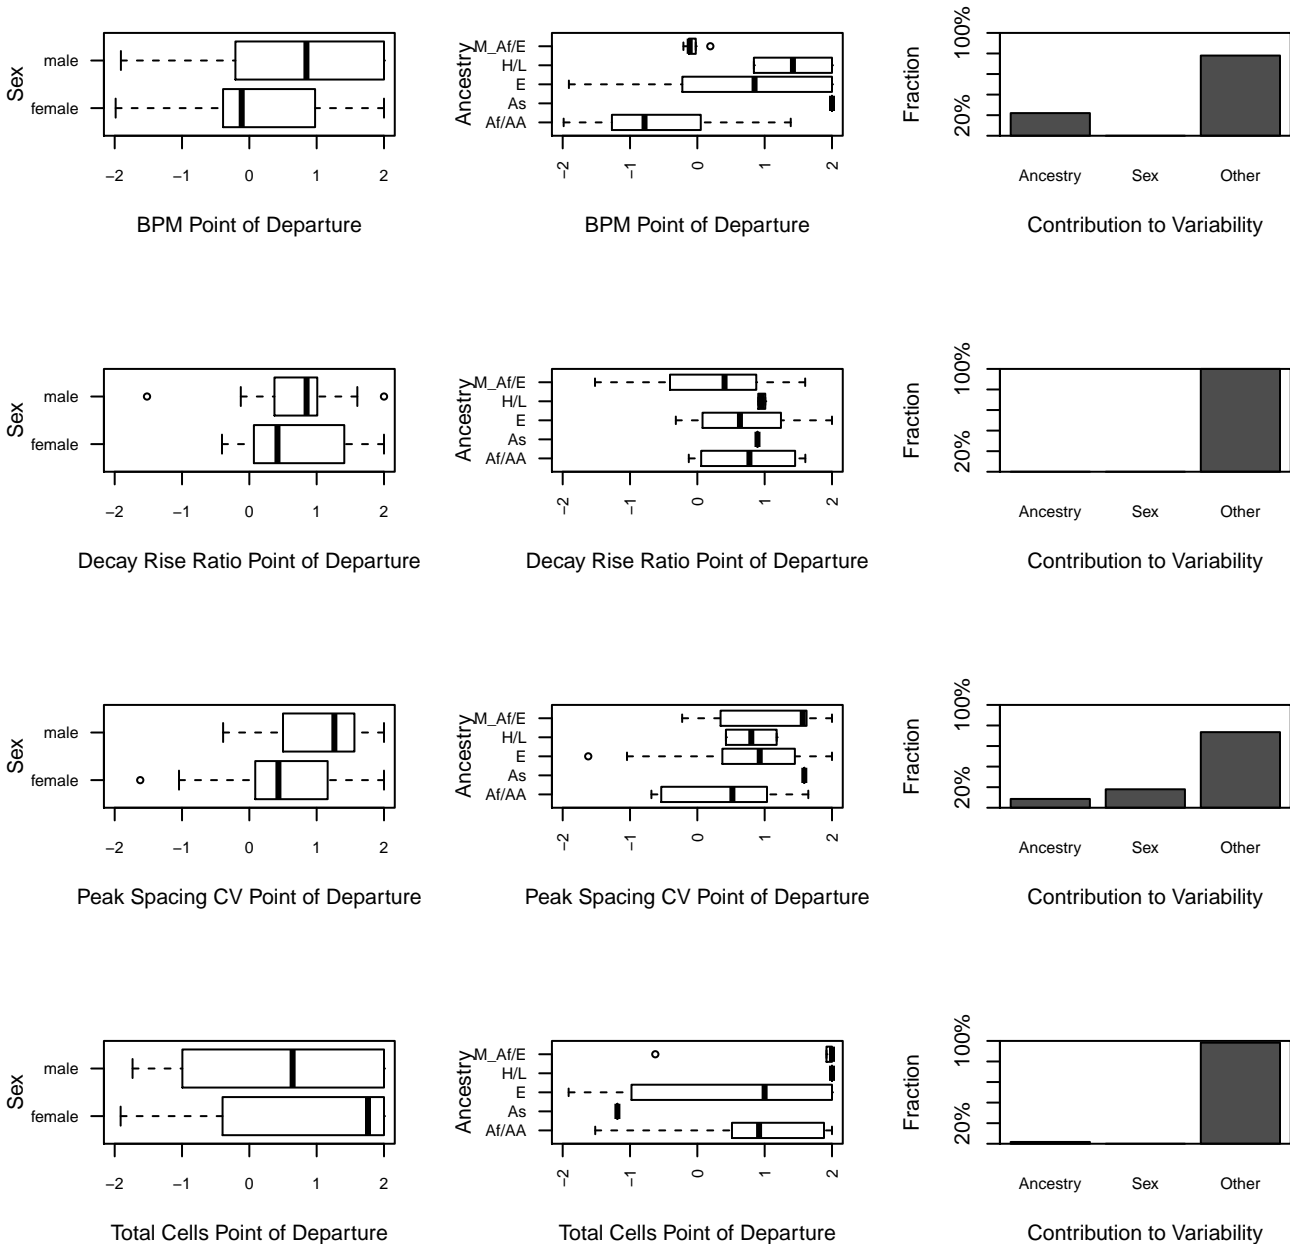

# Quinine.HCl.2H2O 22

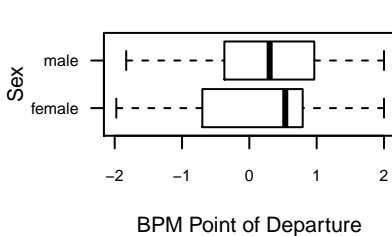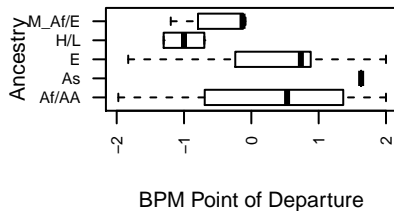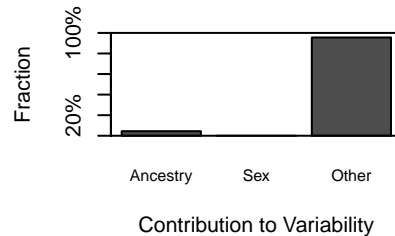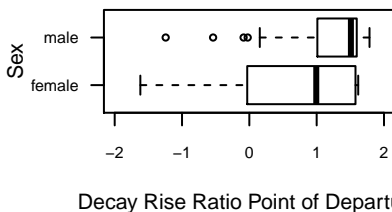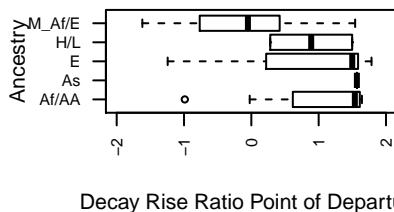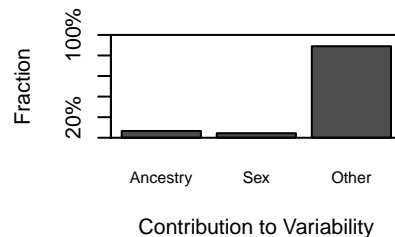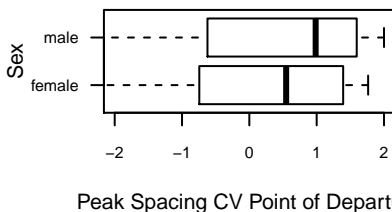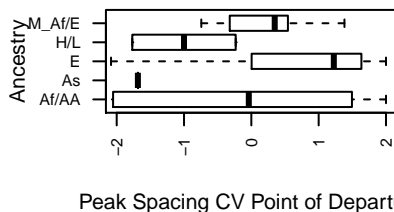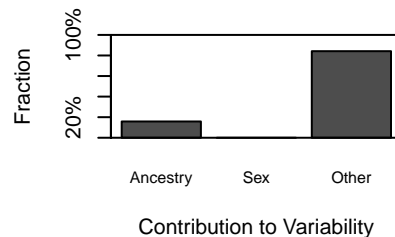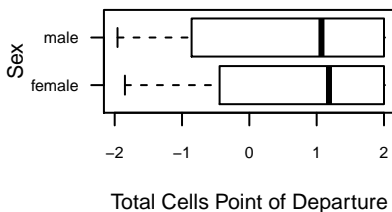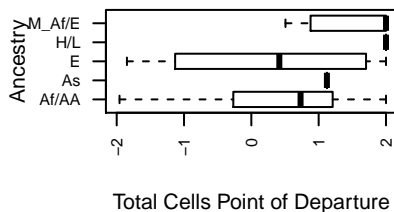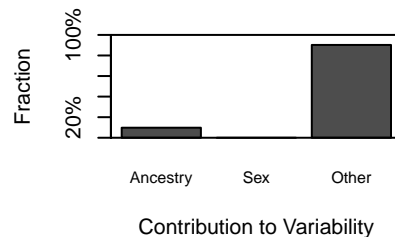

# chlorpromazine\_Hydrochloride 23

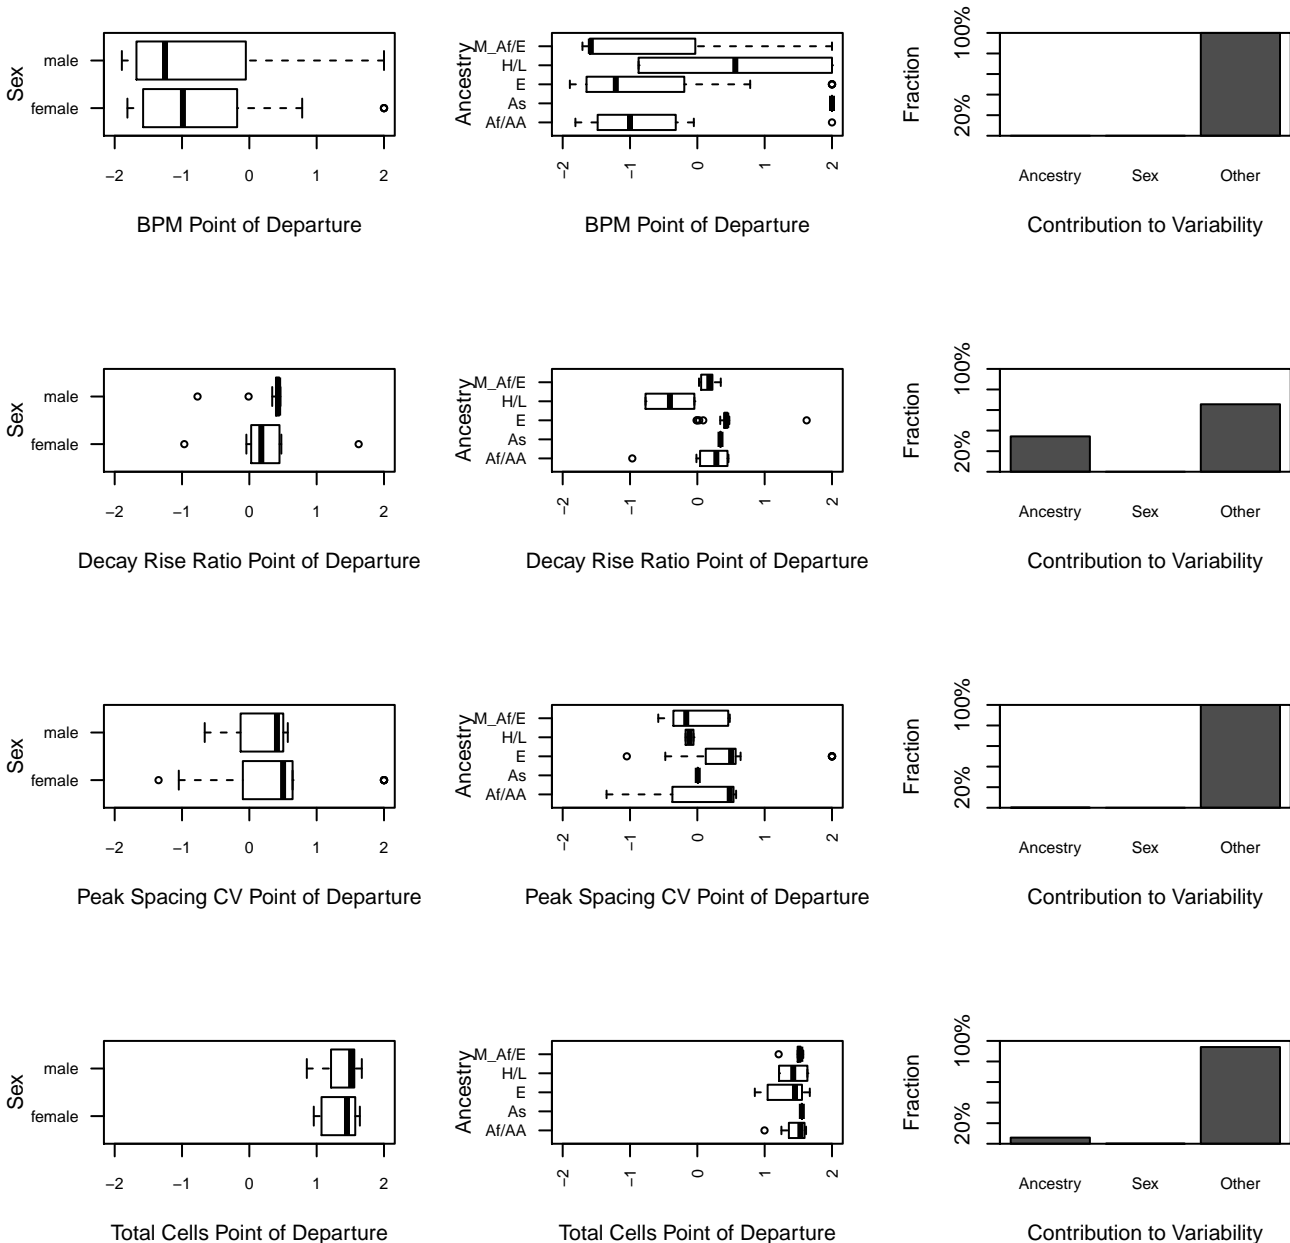



# Isoproterenol 24

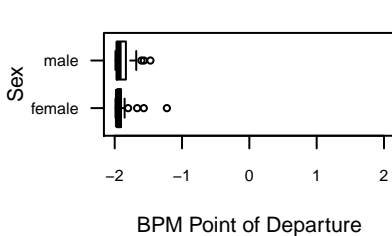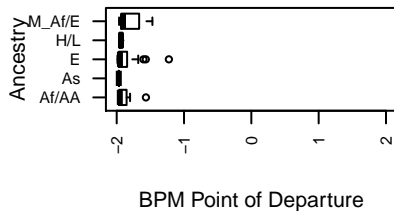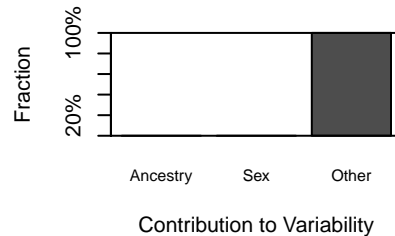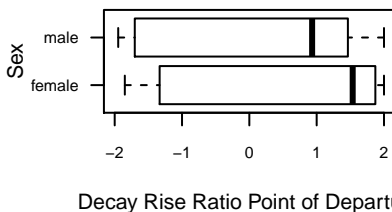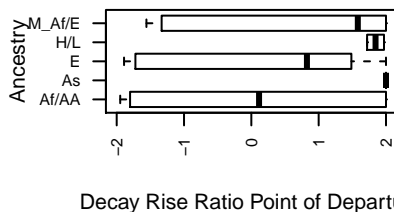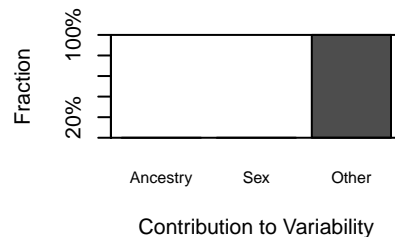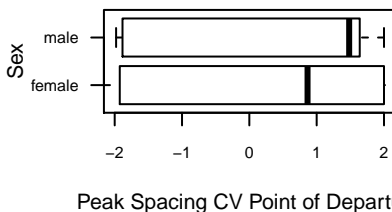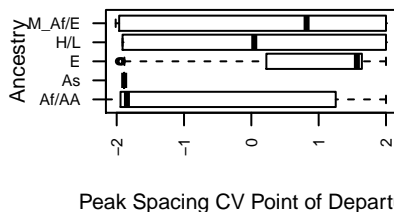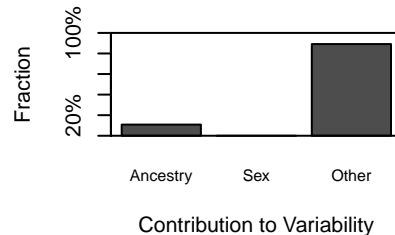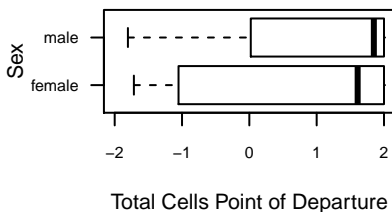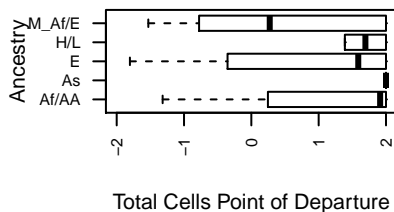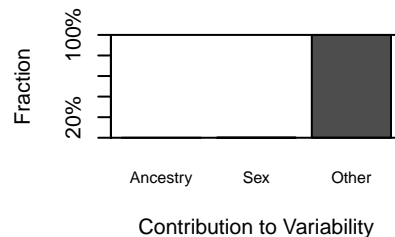

# Nifedipine 25

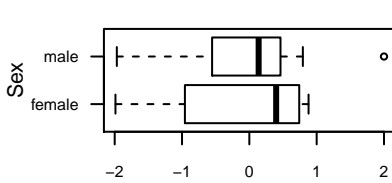

BPM Point of Departure

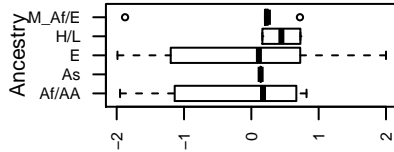

BPM Point of Departure

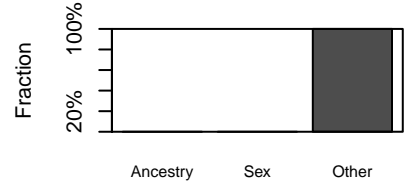

Contribution to Variability

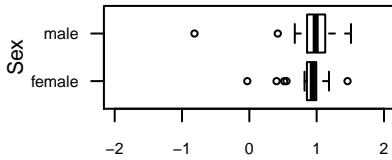

Decay Rise Ratio Point of Departure

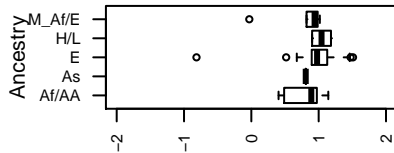

Decay Rise Ratio Point of Departure

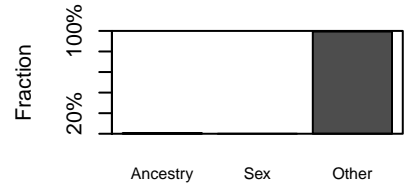

Contribution to Variability

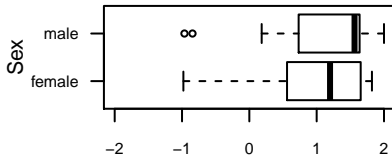

Peak Spacing CV Point of Departure

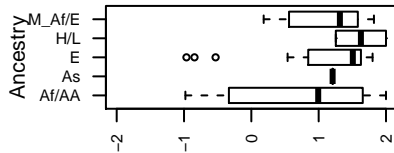

Peak Spacing CV Point of Departure

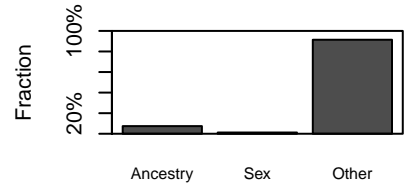

Contribution to Variability

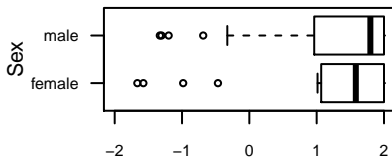

Total Cells Point of Departure

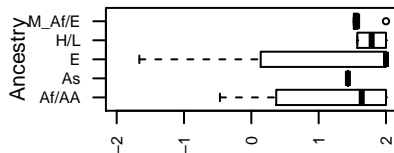

Total Cells Point of Departure

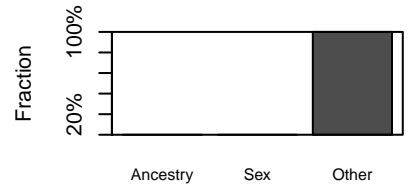

Contribution to Variability

# Azithromycin 26

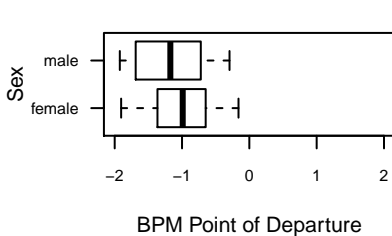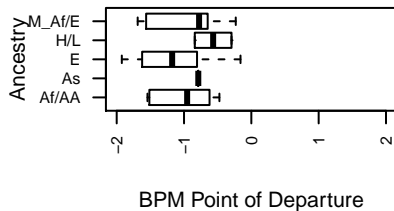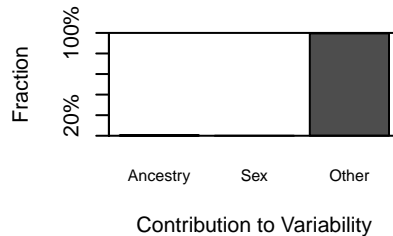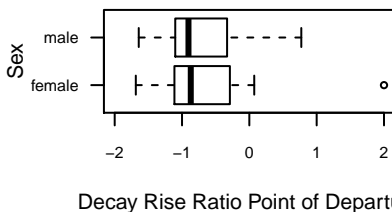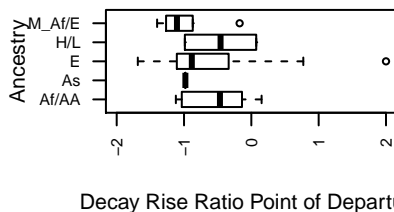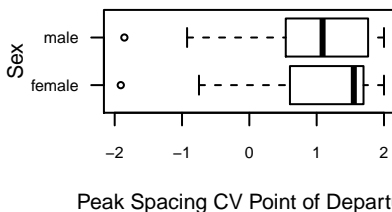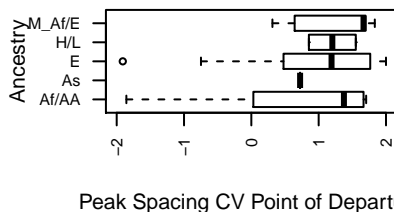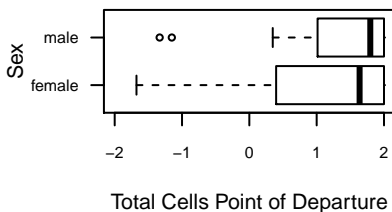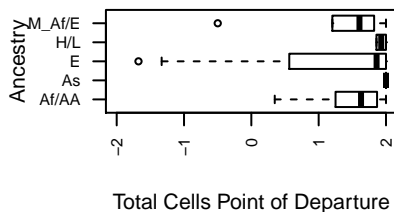

# Propranolol 27

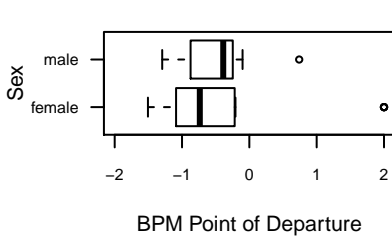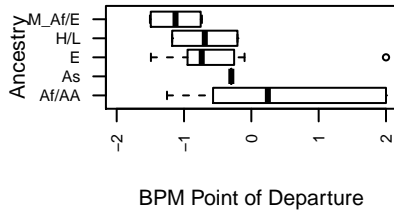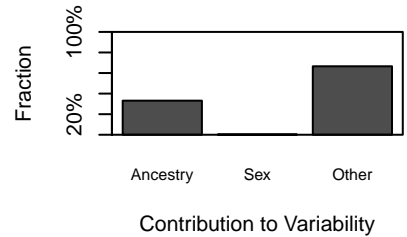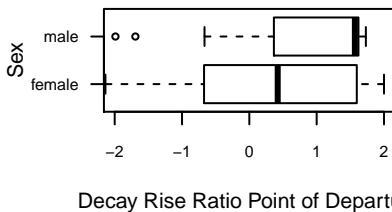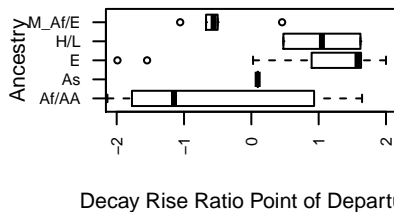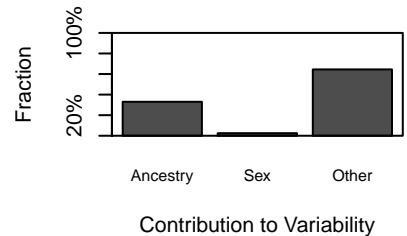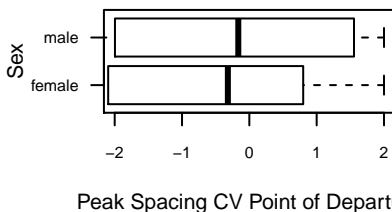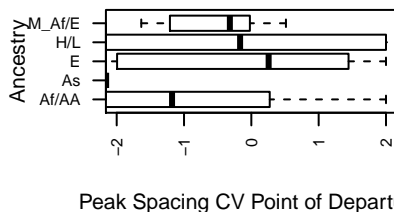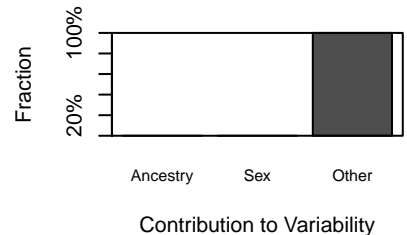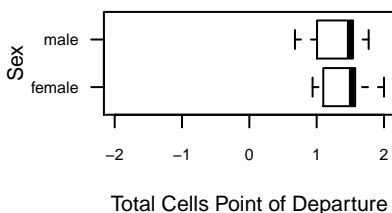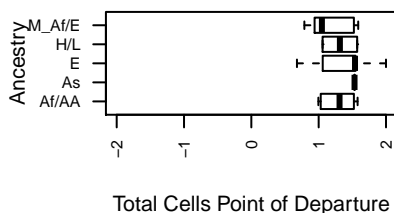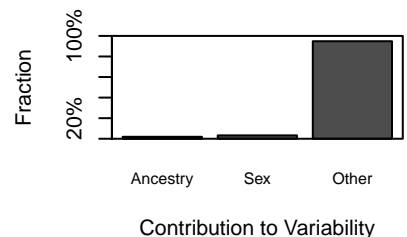

# sotalol\_hydrochloride 28

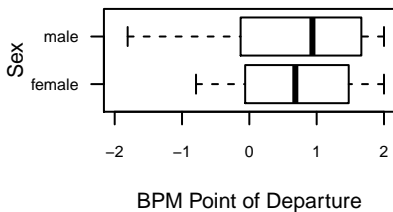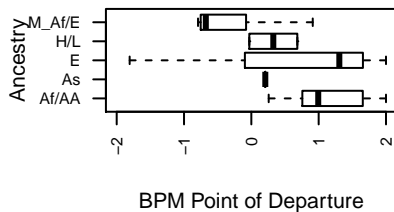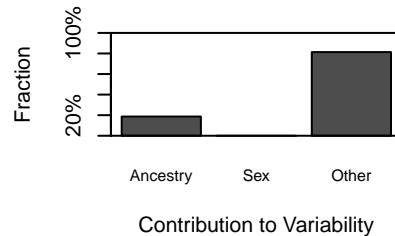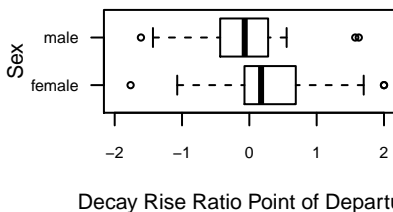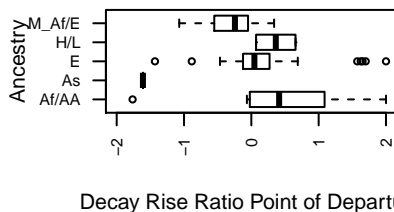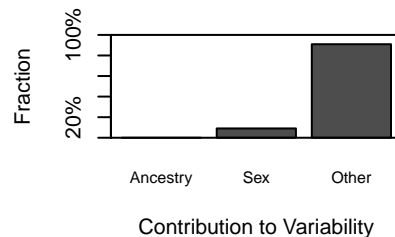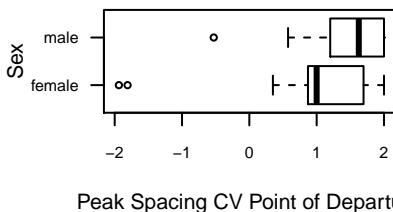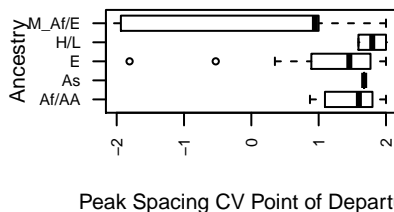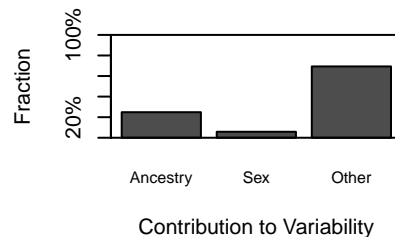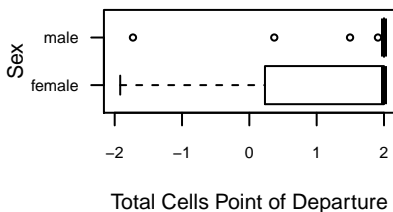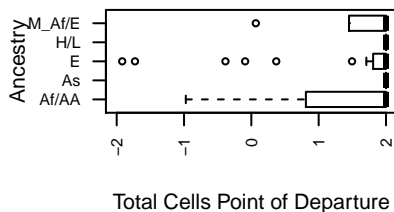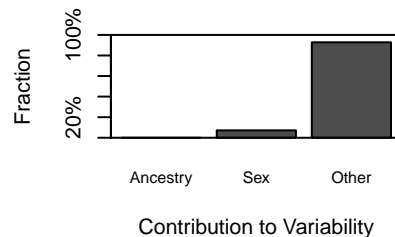

# Sotalol 29

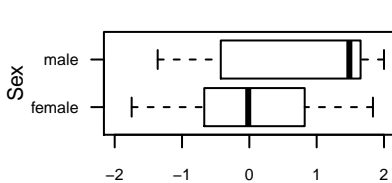

BPM Point of Departure

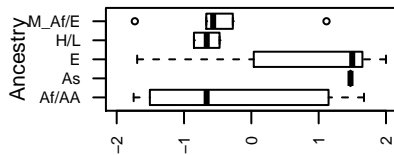

BPM Point of Departure

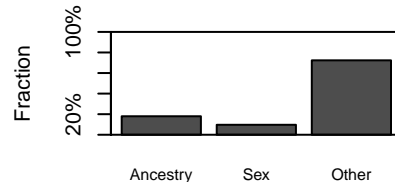

Contribution to Variability

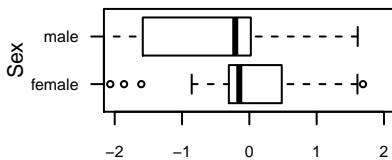

Decay Rise Ratio Point of Departure

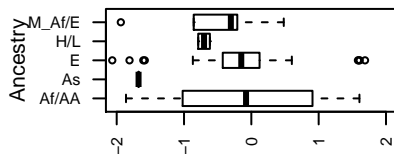

Decay Rise Ratio Point of Departure

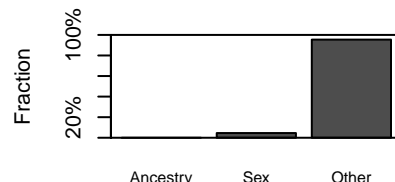

Contribution to Variability

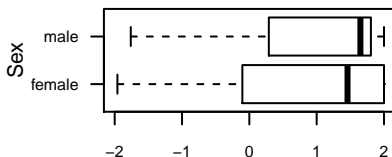

Peak Spacing CV Point of Departure

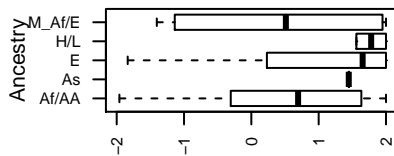

Peak Spacing CV Point of Departure

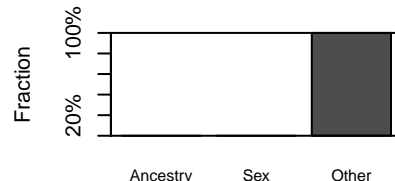

Contribution to Variability

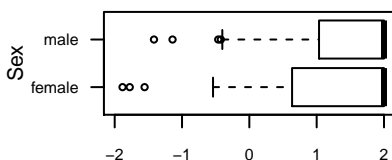

Total Cells Point of Departure

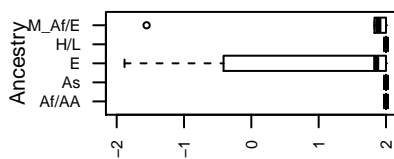

Total Cells Point of Departure

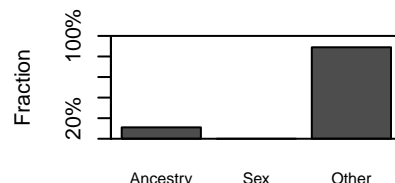

Contribution to Variability

# amitriptyline\_hydrochloride 30

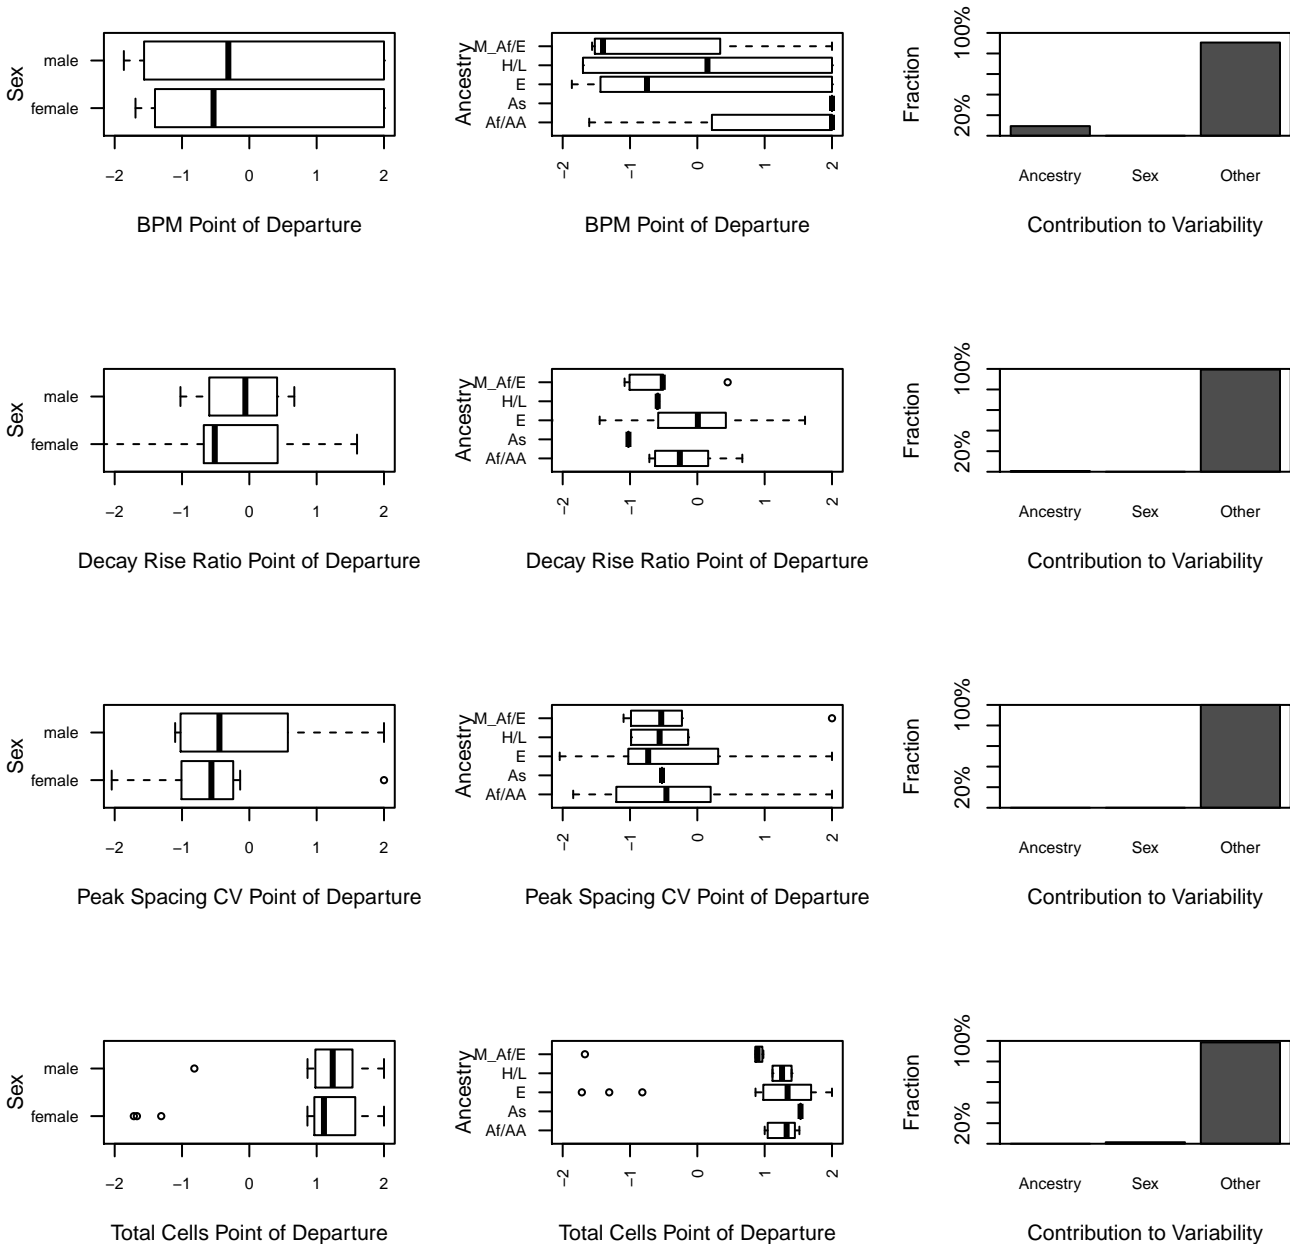

# Lisinopril 31

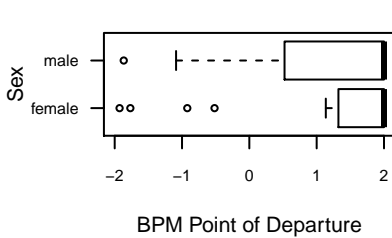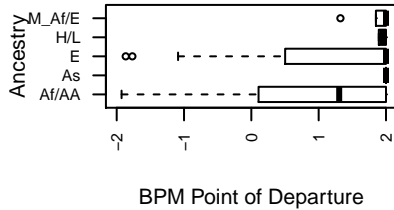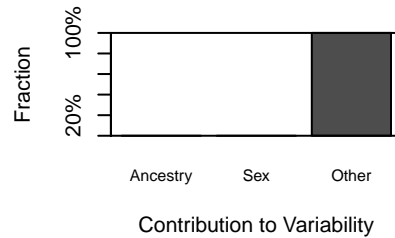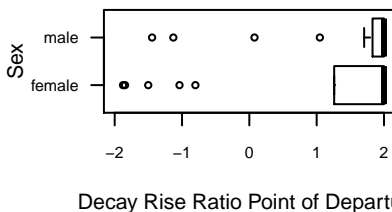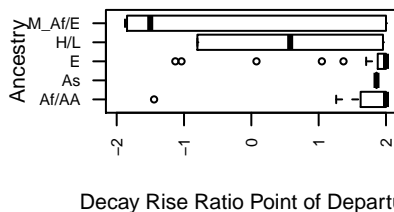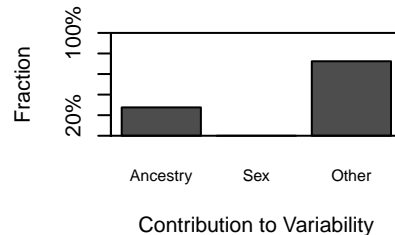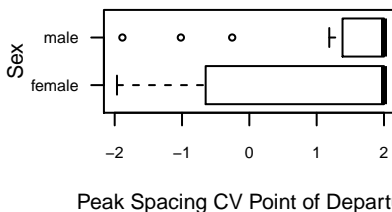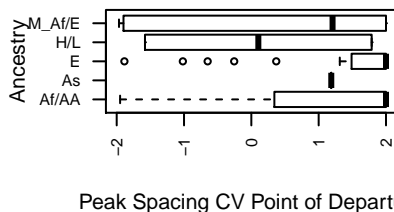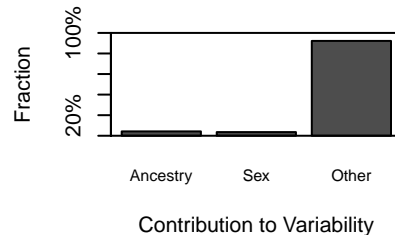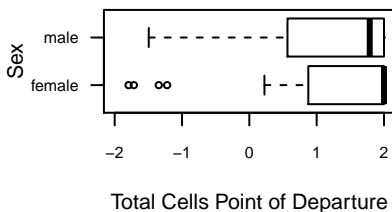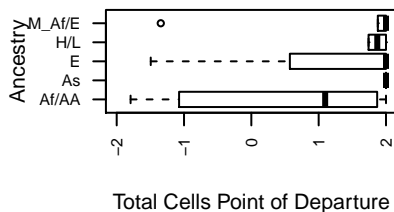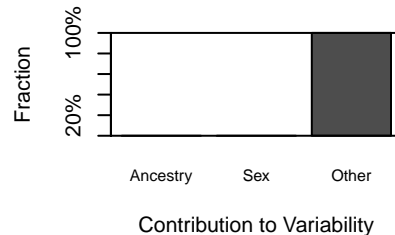



# Ranitidine.HCl 32

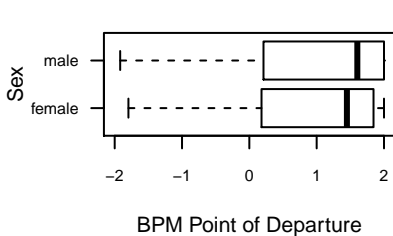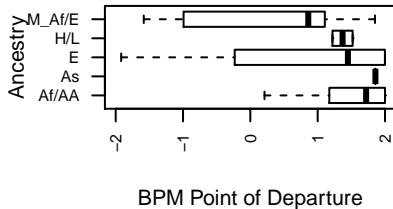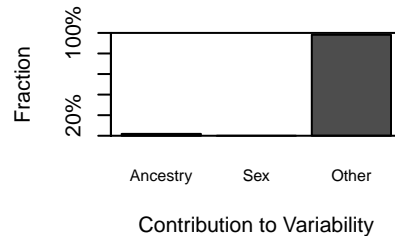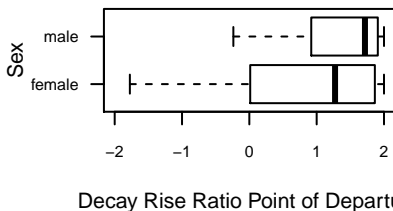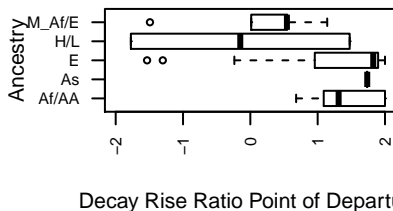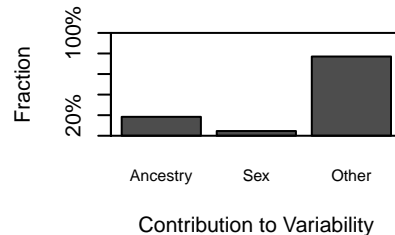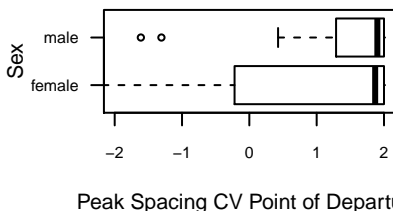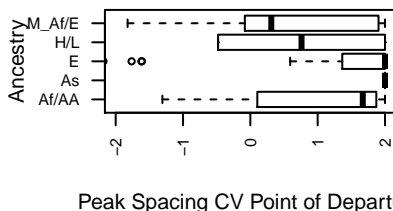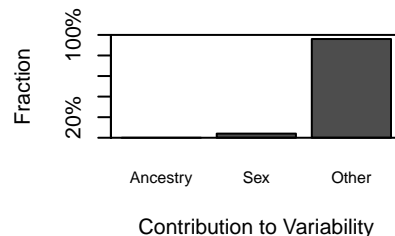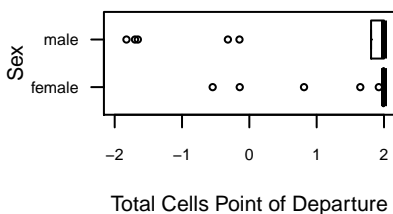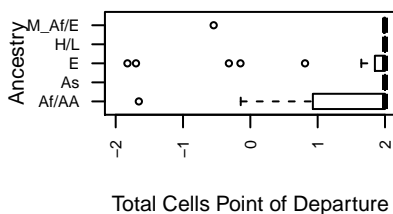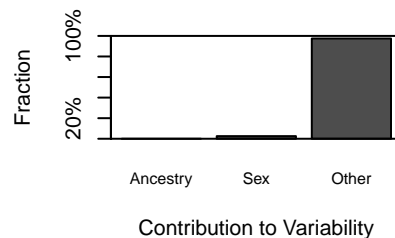

# nitrendipine 33

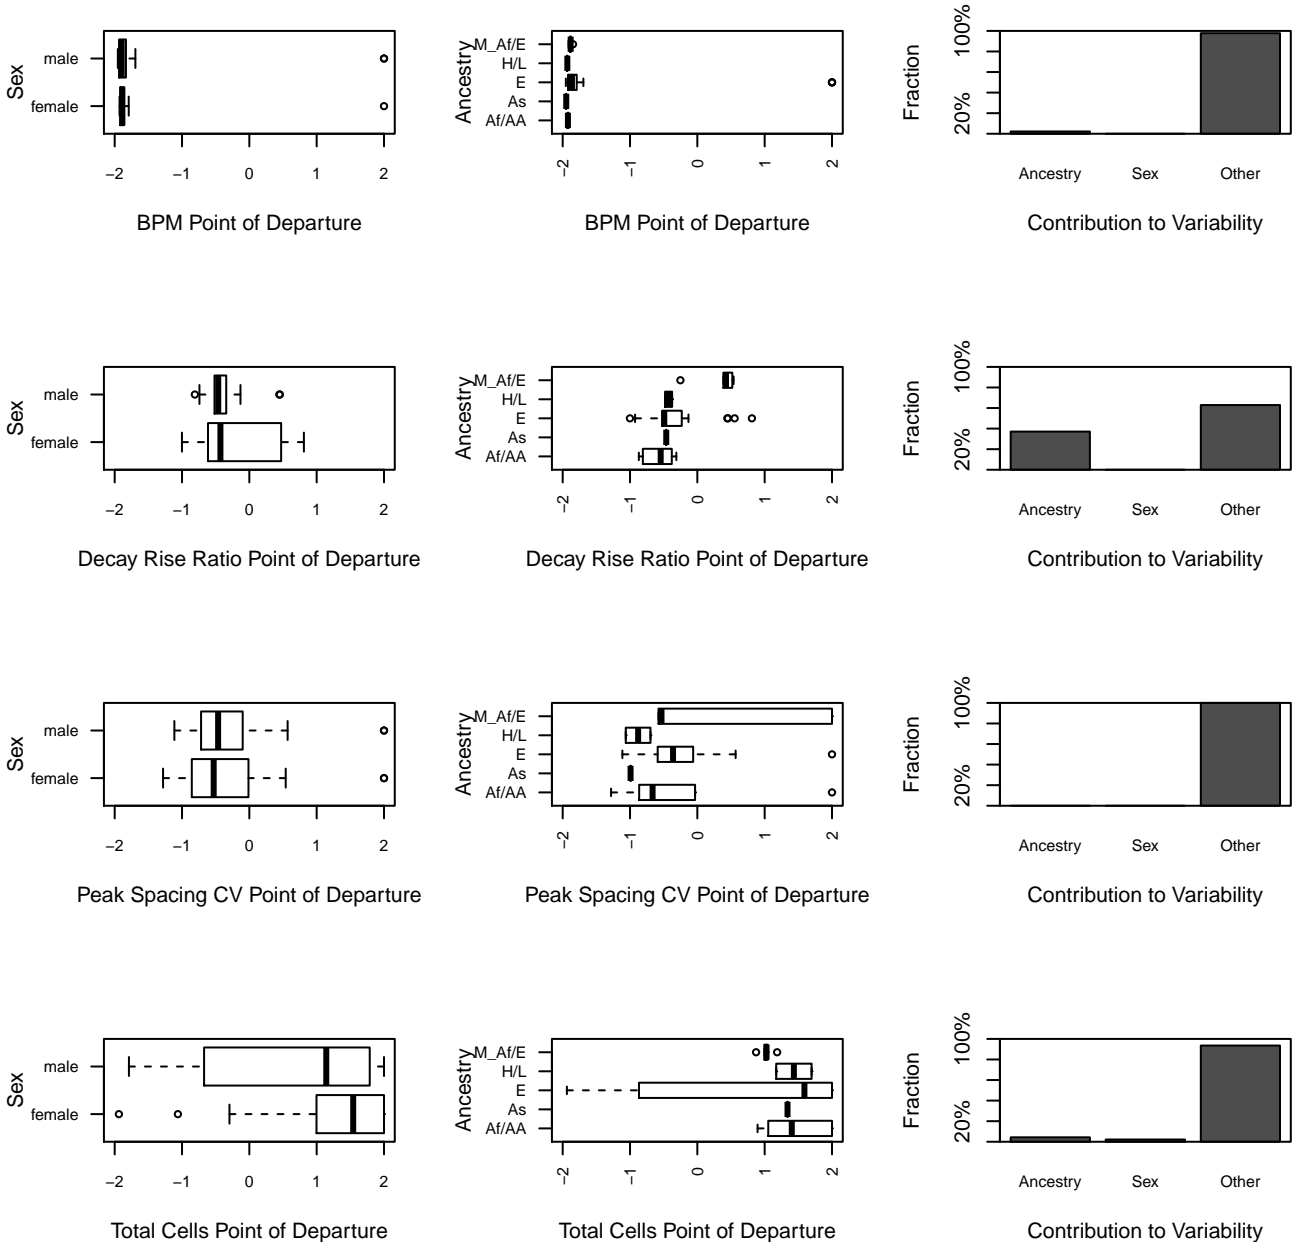

# quinidine\_sulfate 34

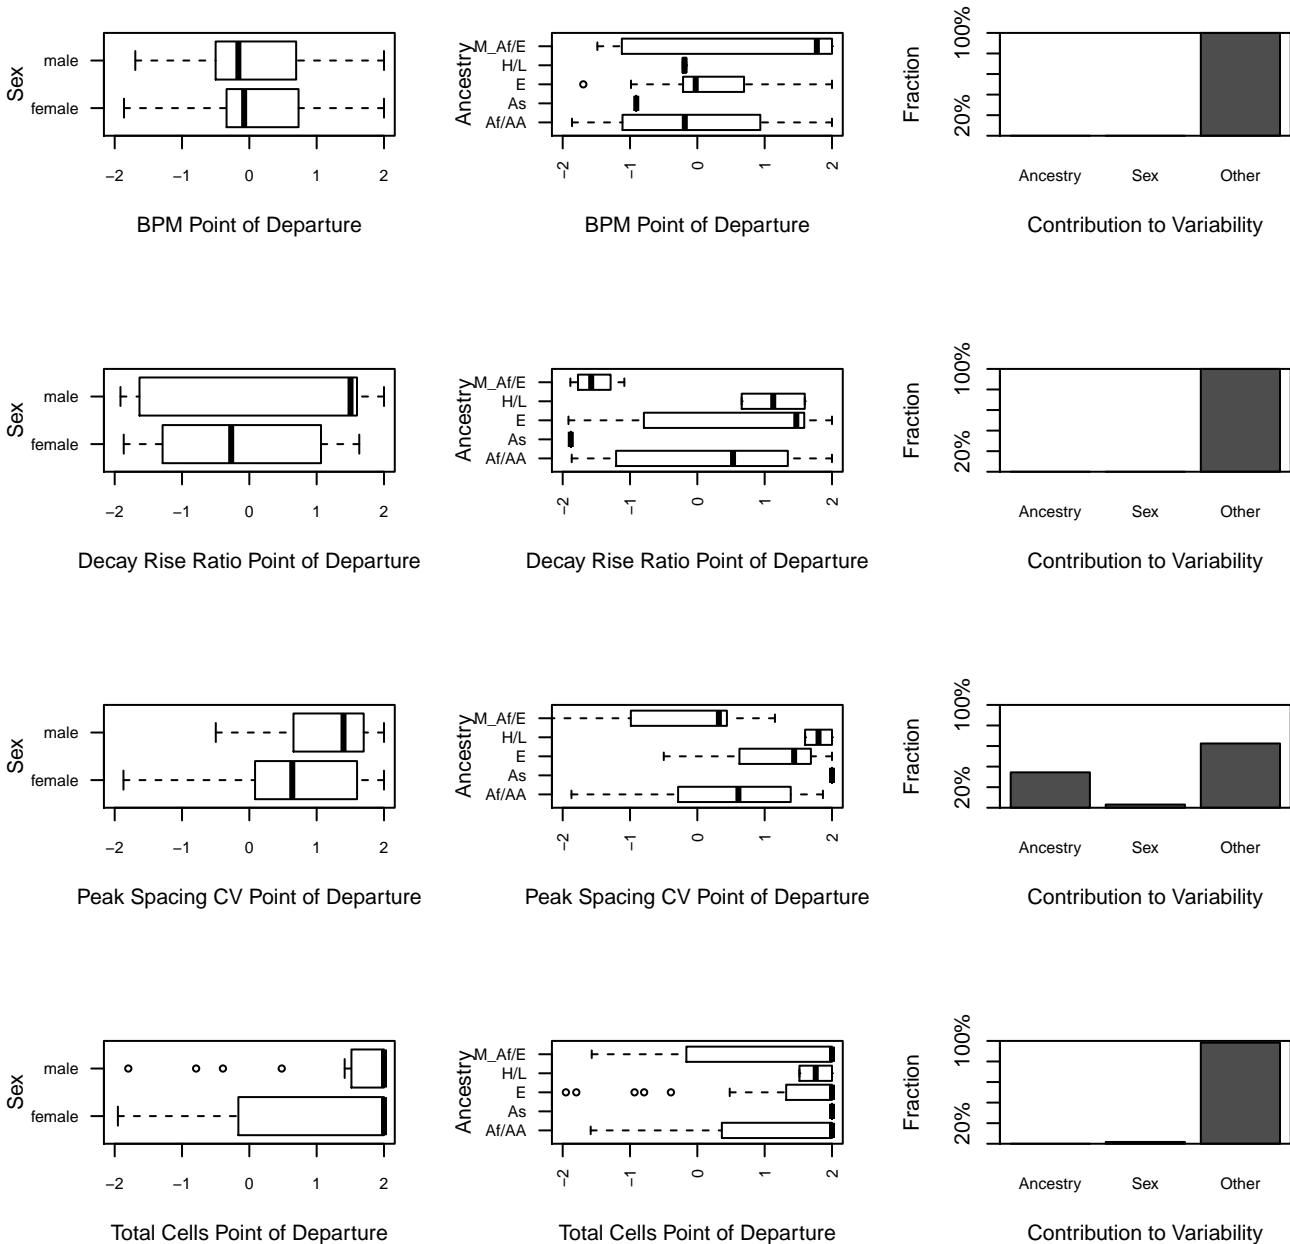

# sematilide 35

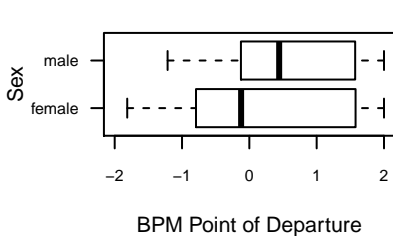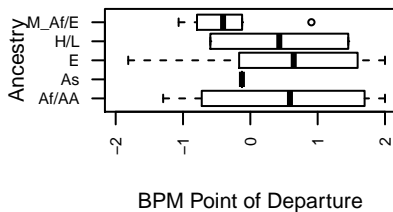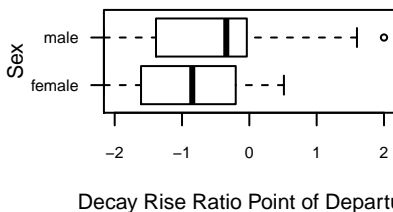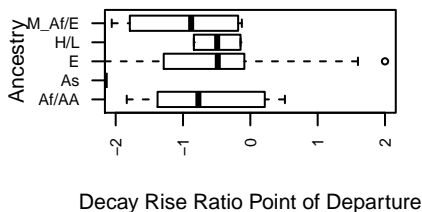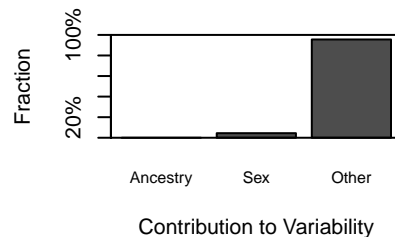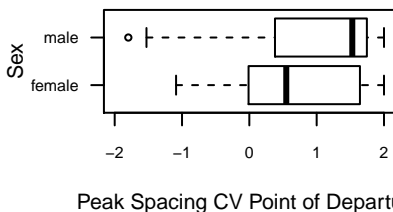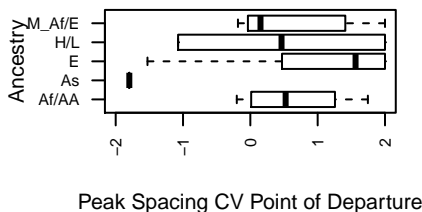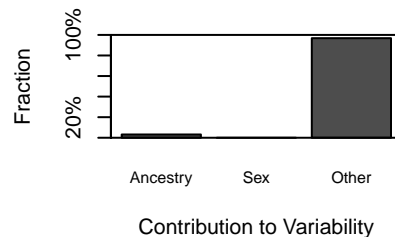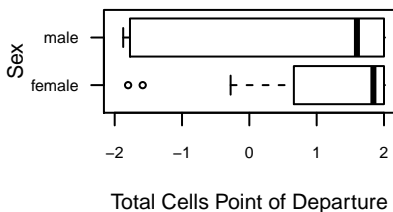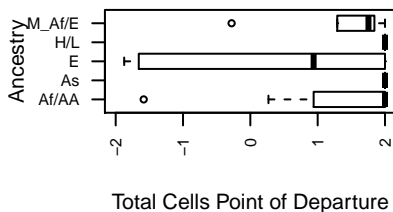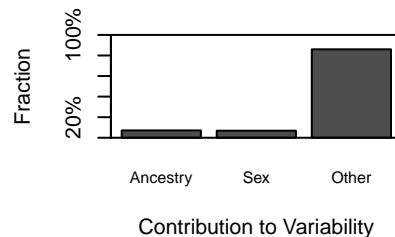

# Chloroquine 36

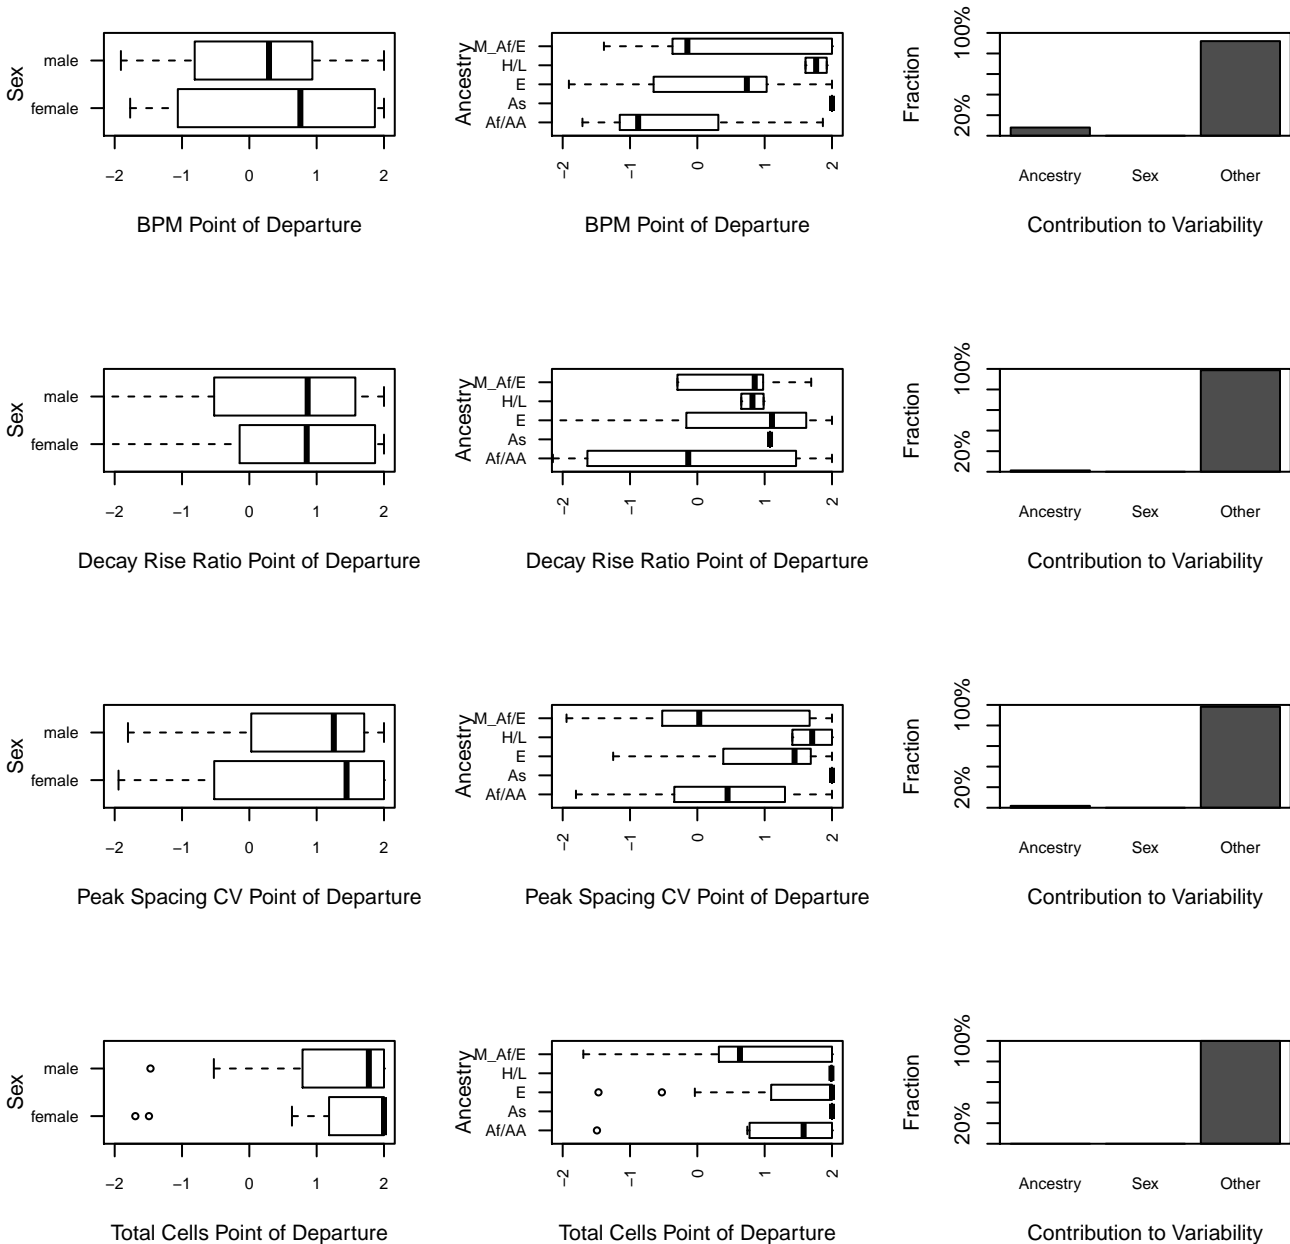

# moxifloxacin\_hydrochloride 37

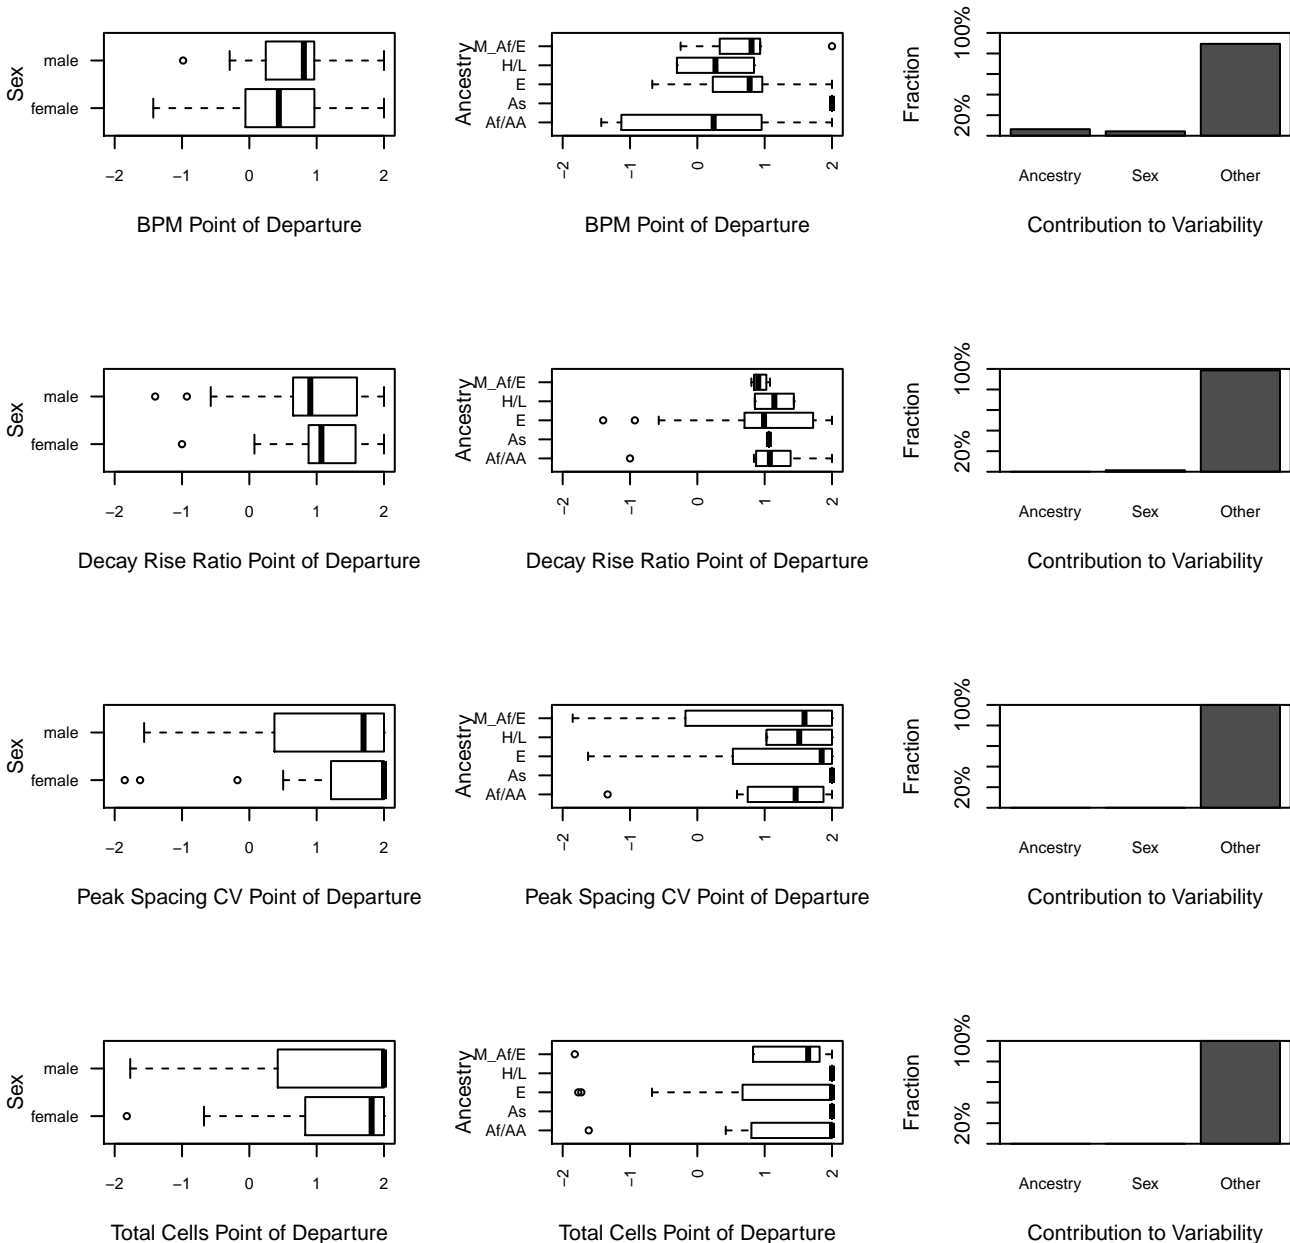

# mexiletine\_hydrochloride 38

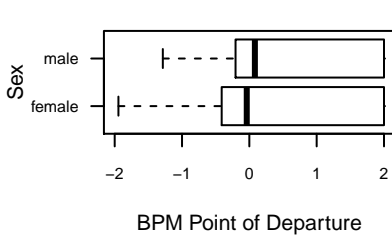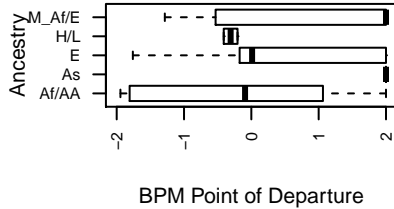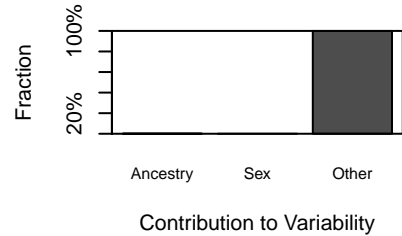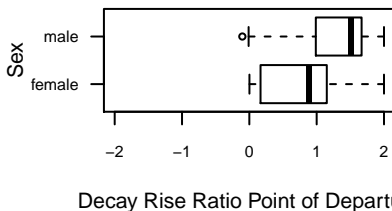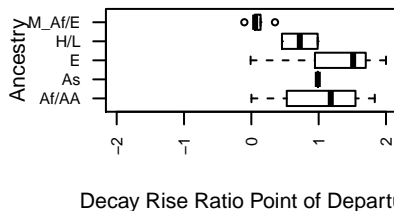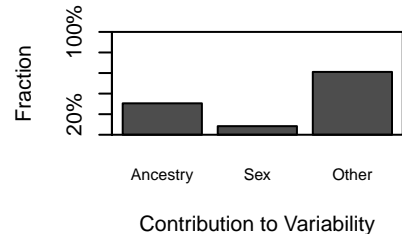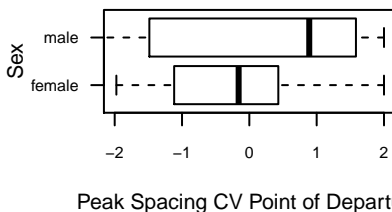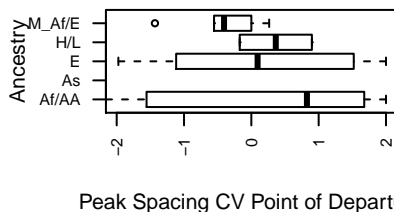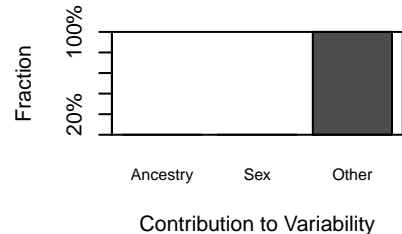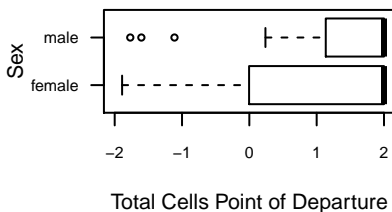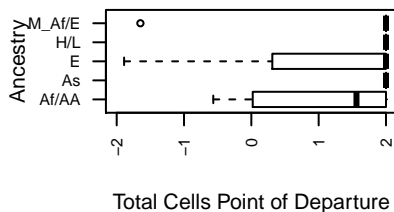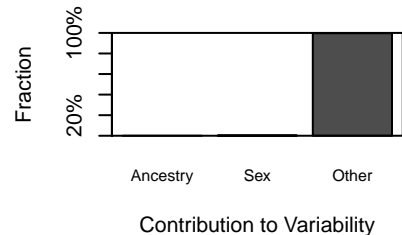

# Lignocaine(Lidocaine) 39

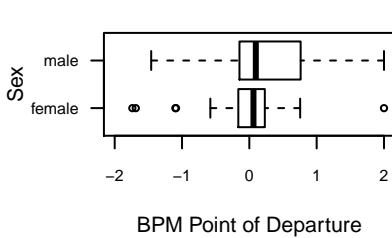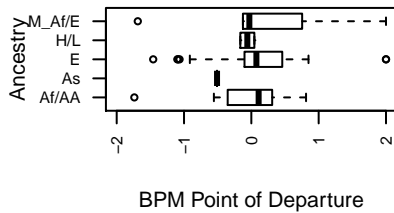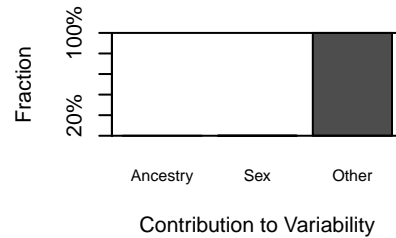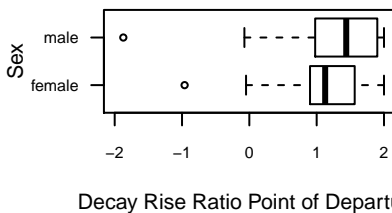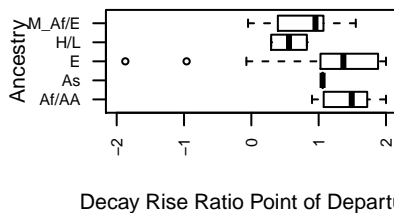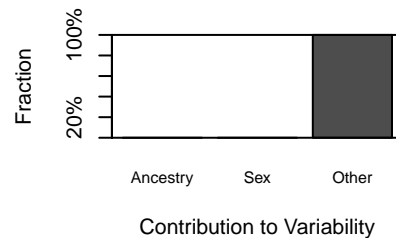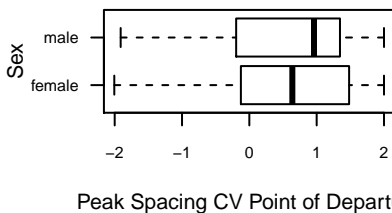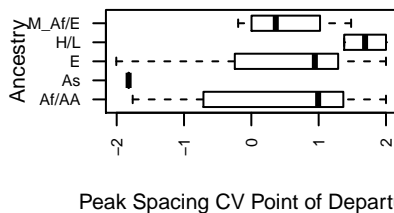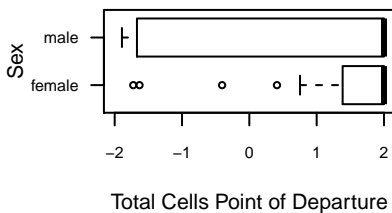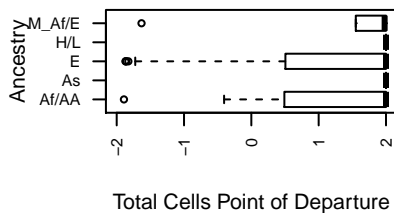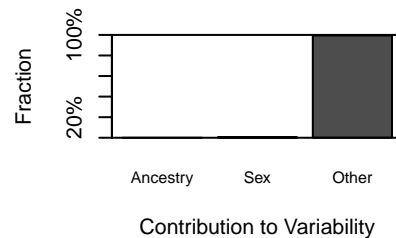



# Terfenadine 40

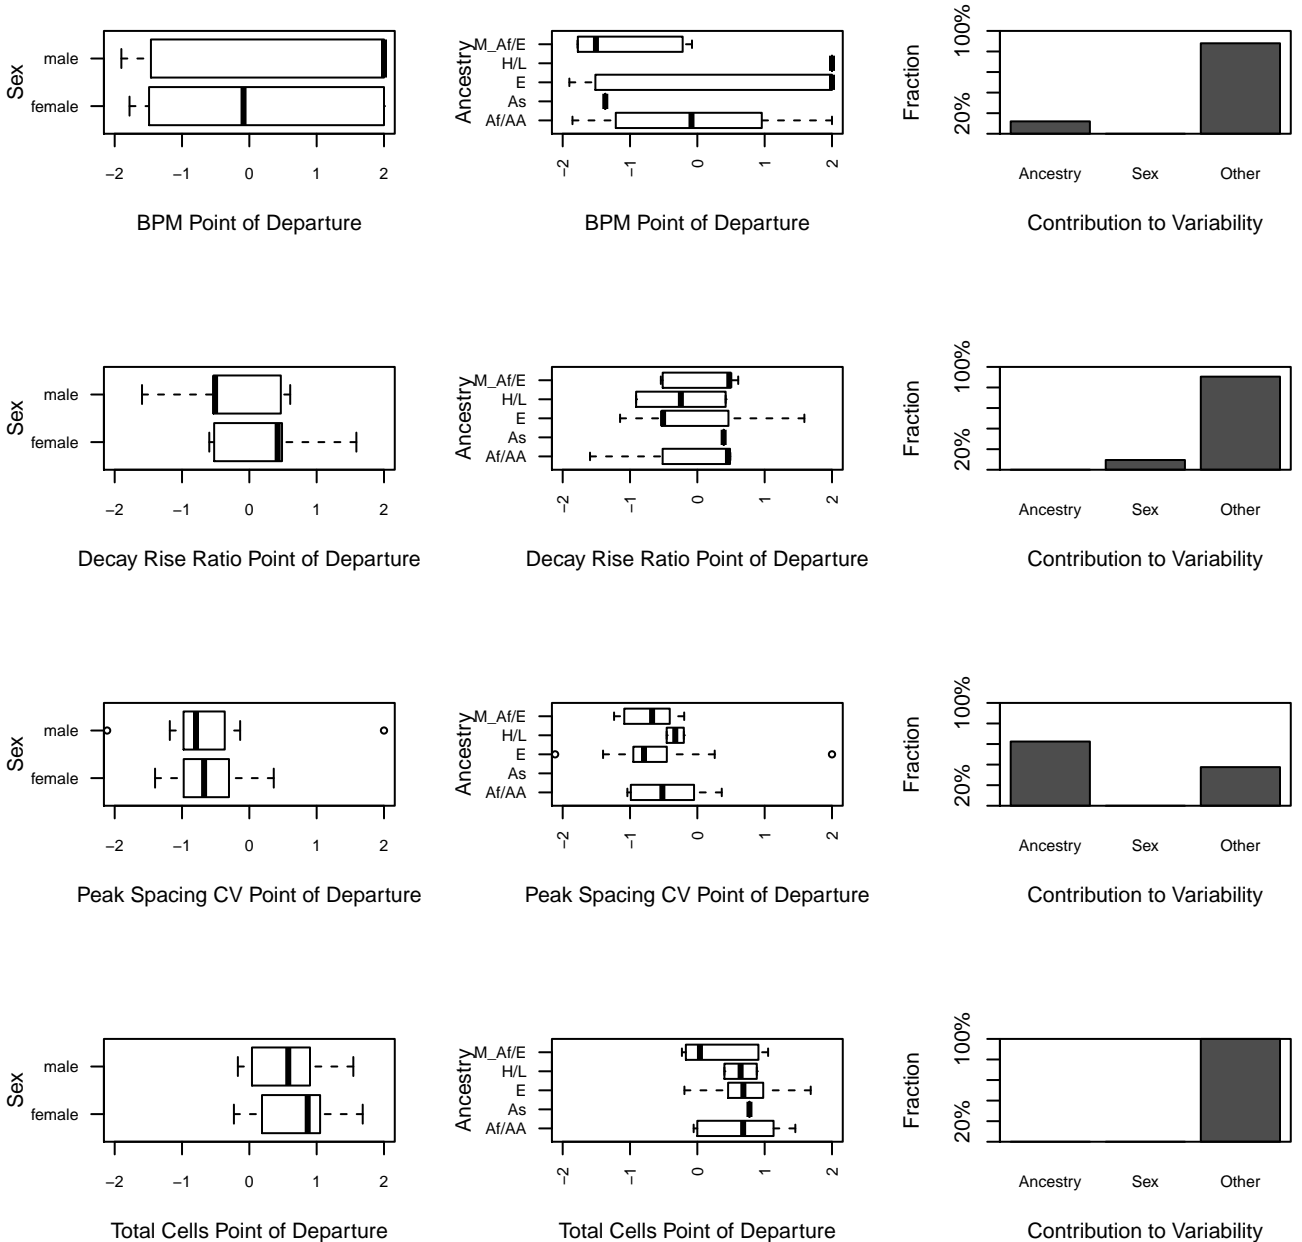

# Retinal 41

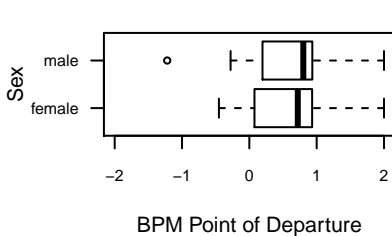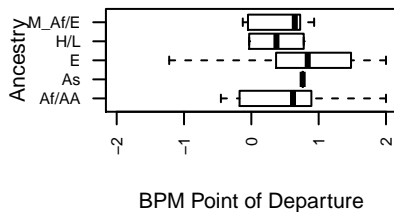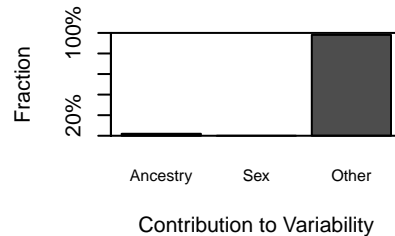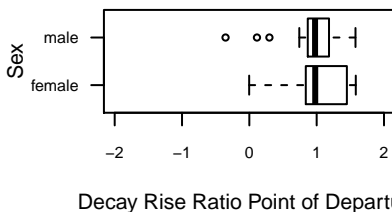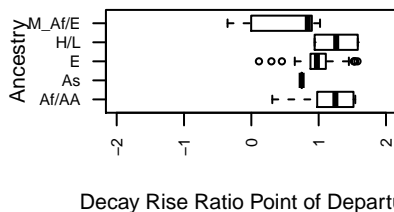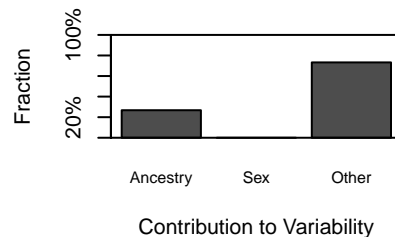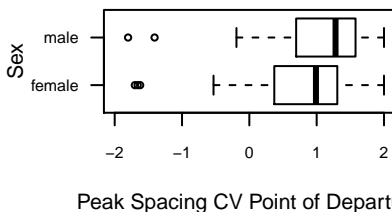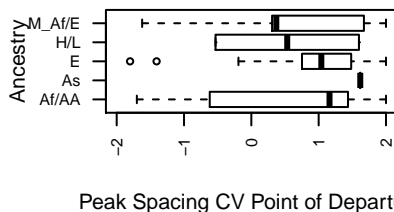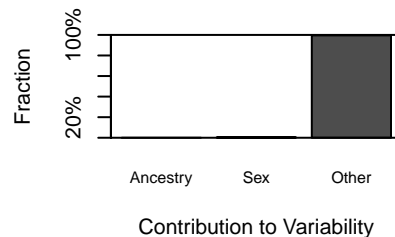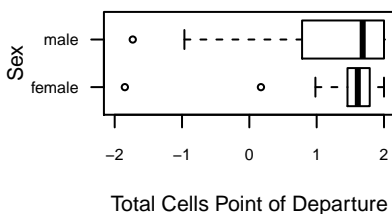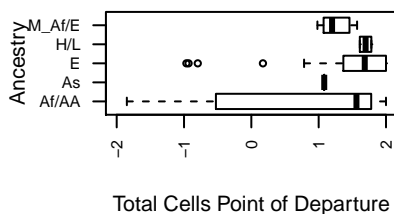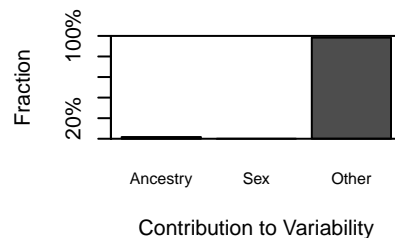

# Alizarin\_Yellow\_R(Mordant\_Orange\_1) 42

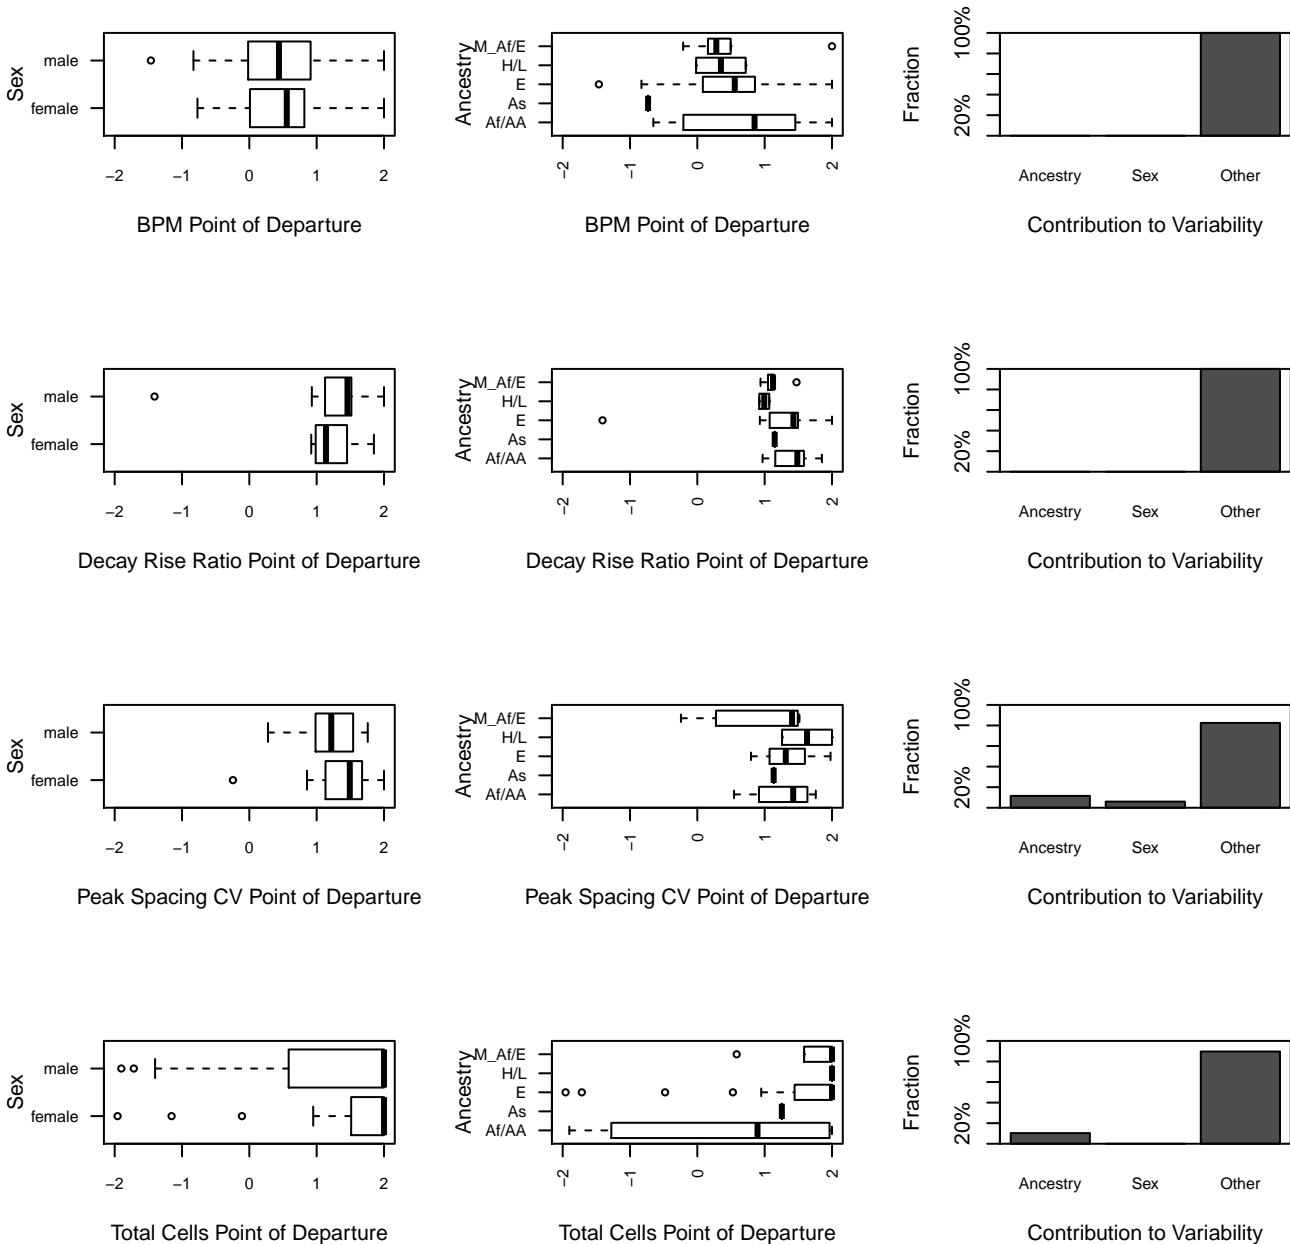

# Titanocene\_dichloride 43

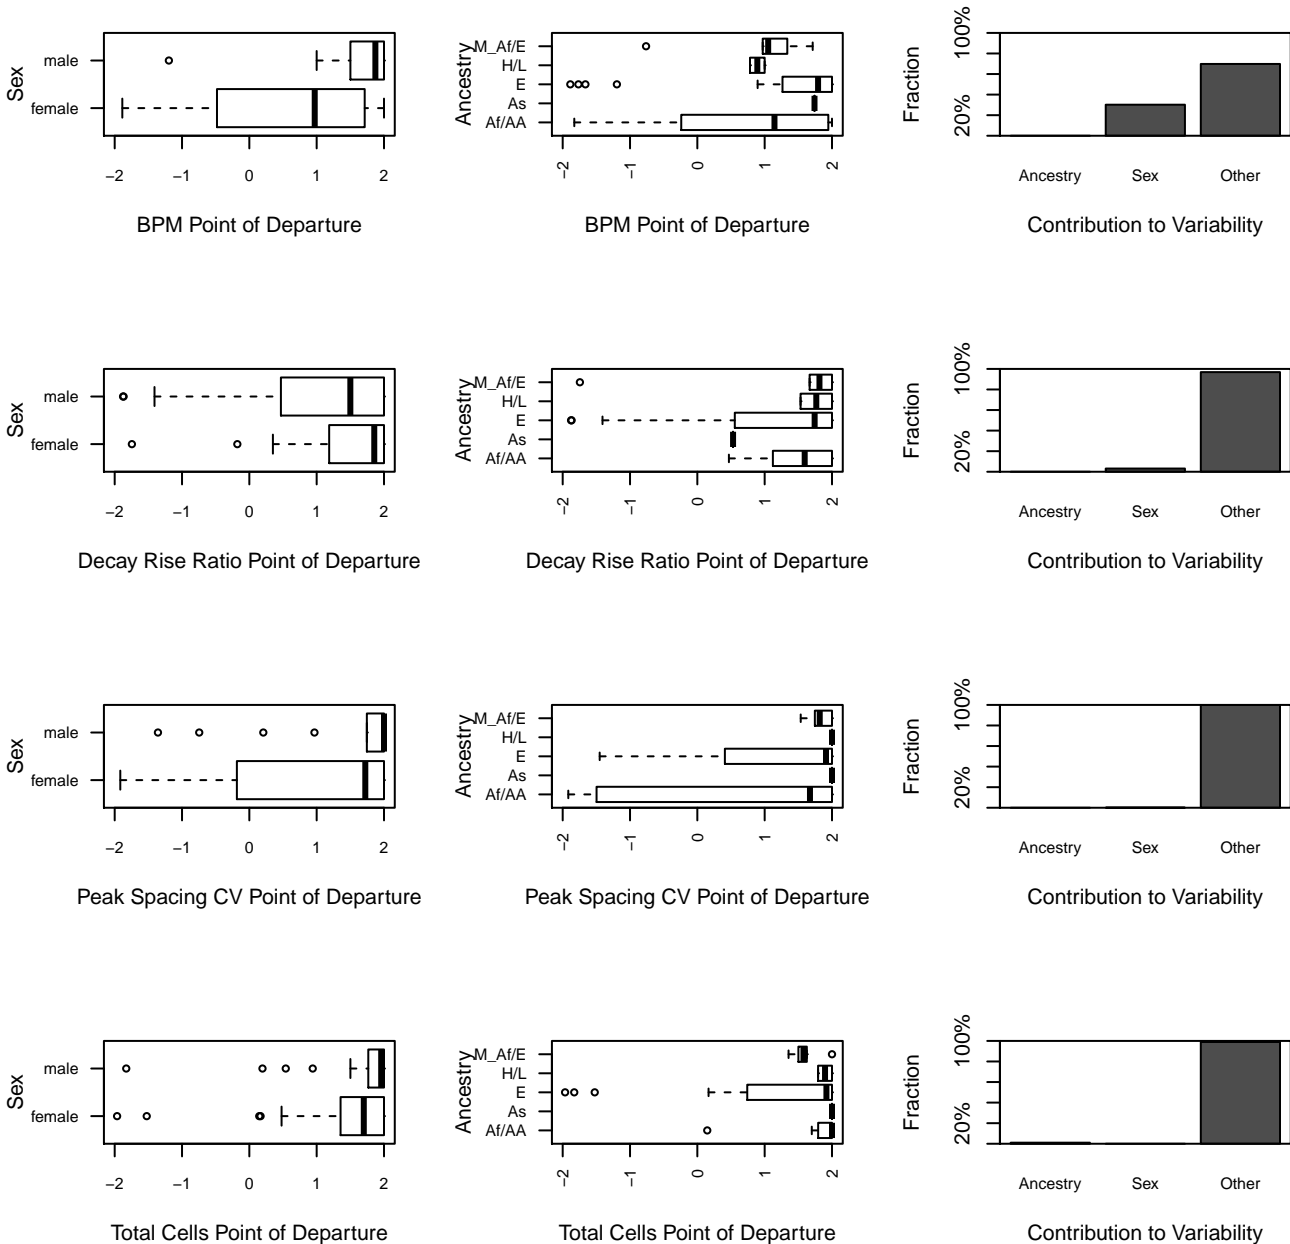

## 2-Amino-4-chlorophenol 44

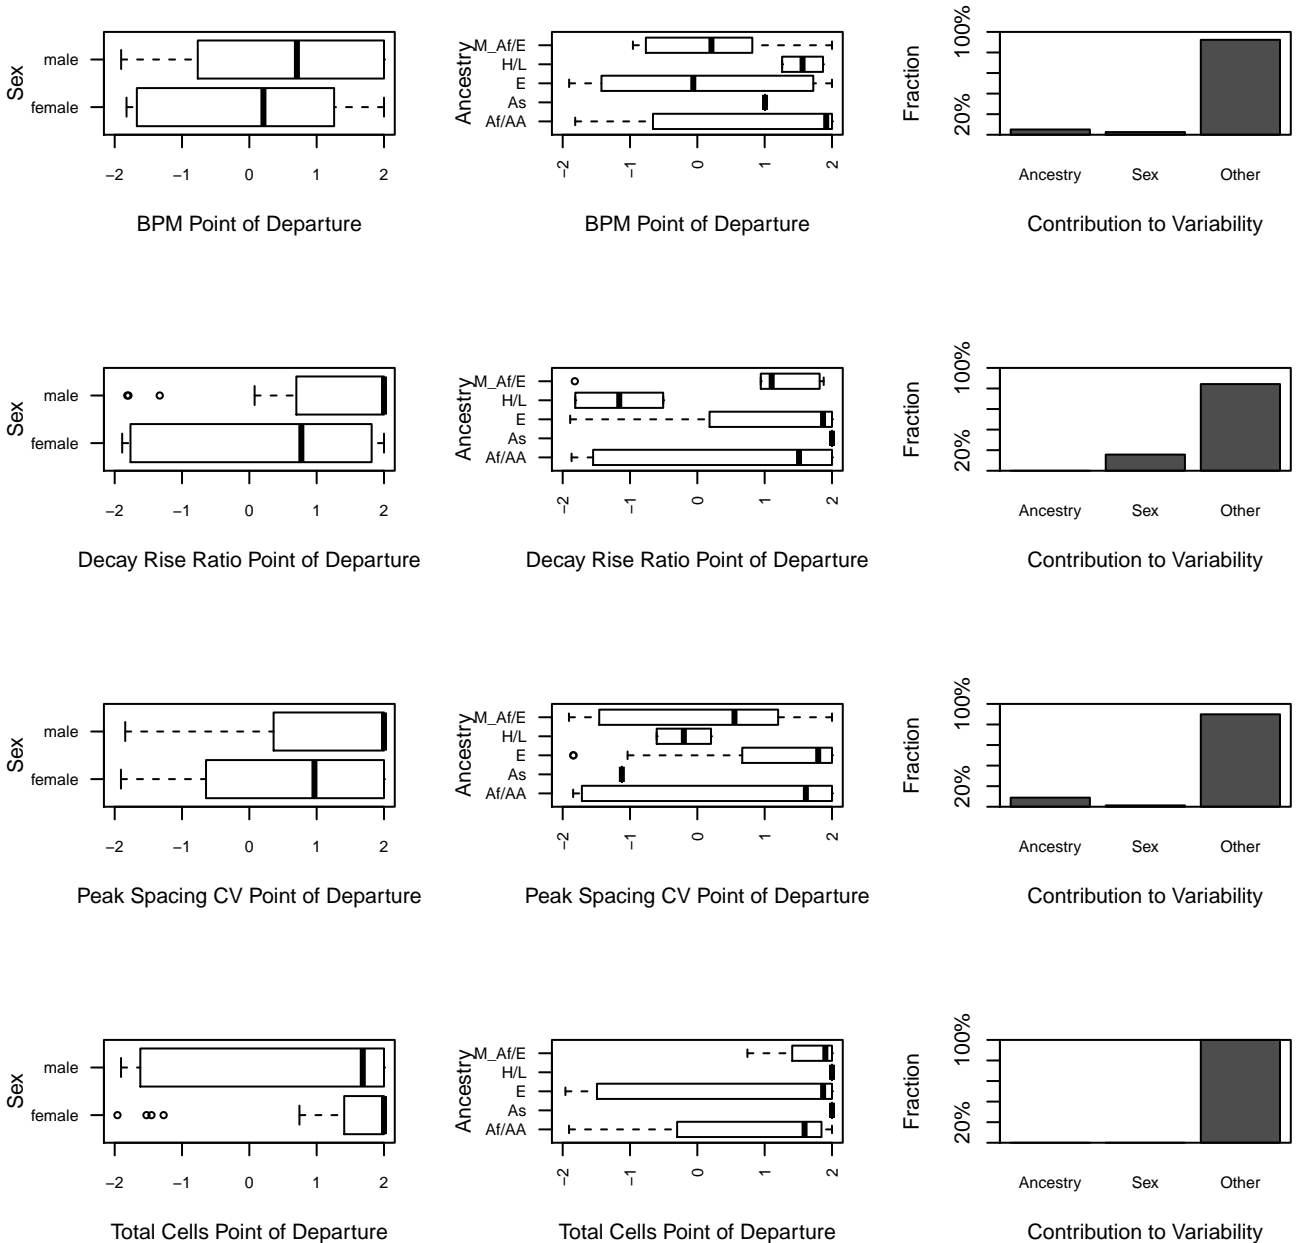

# Tris(2-chloroethyl)phosphate 45

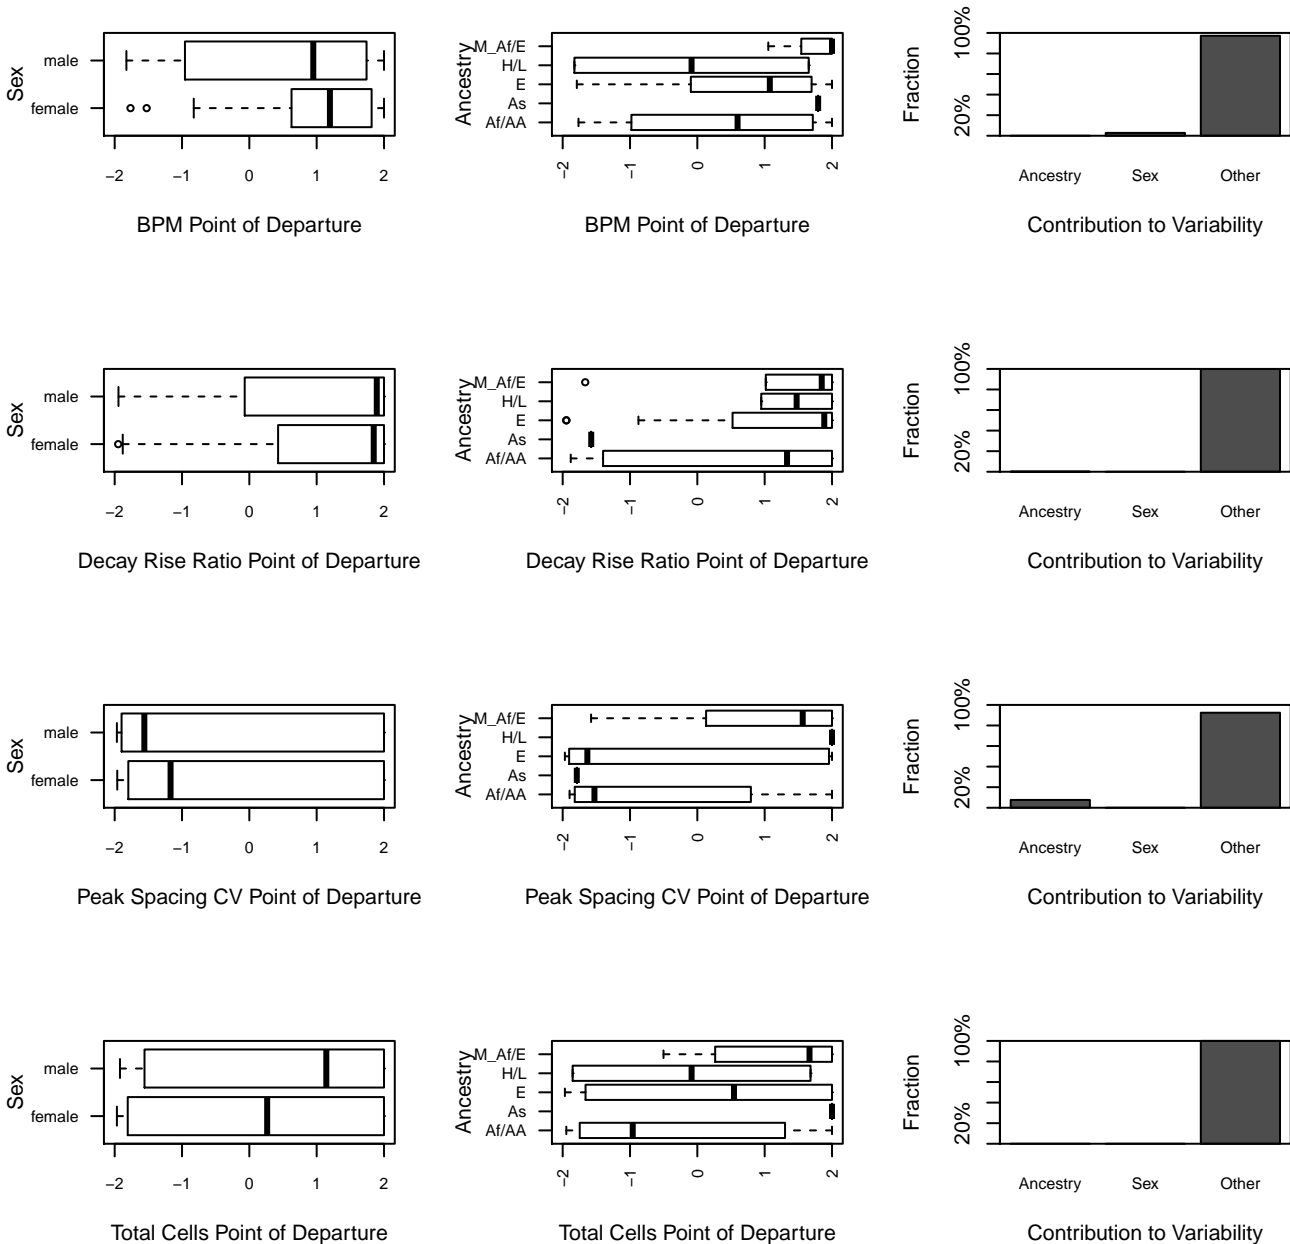

# Carbaryl 46

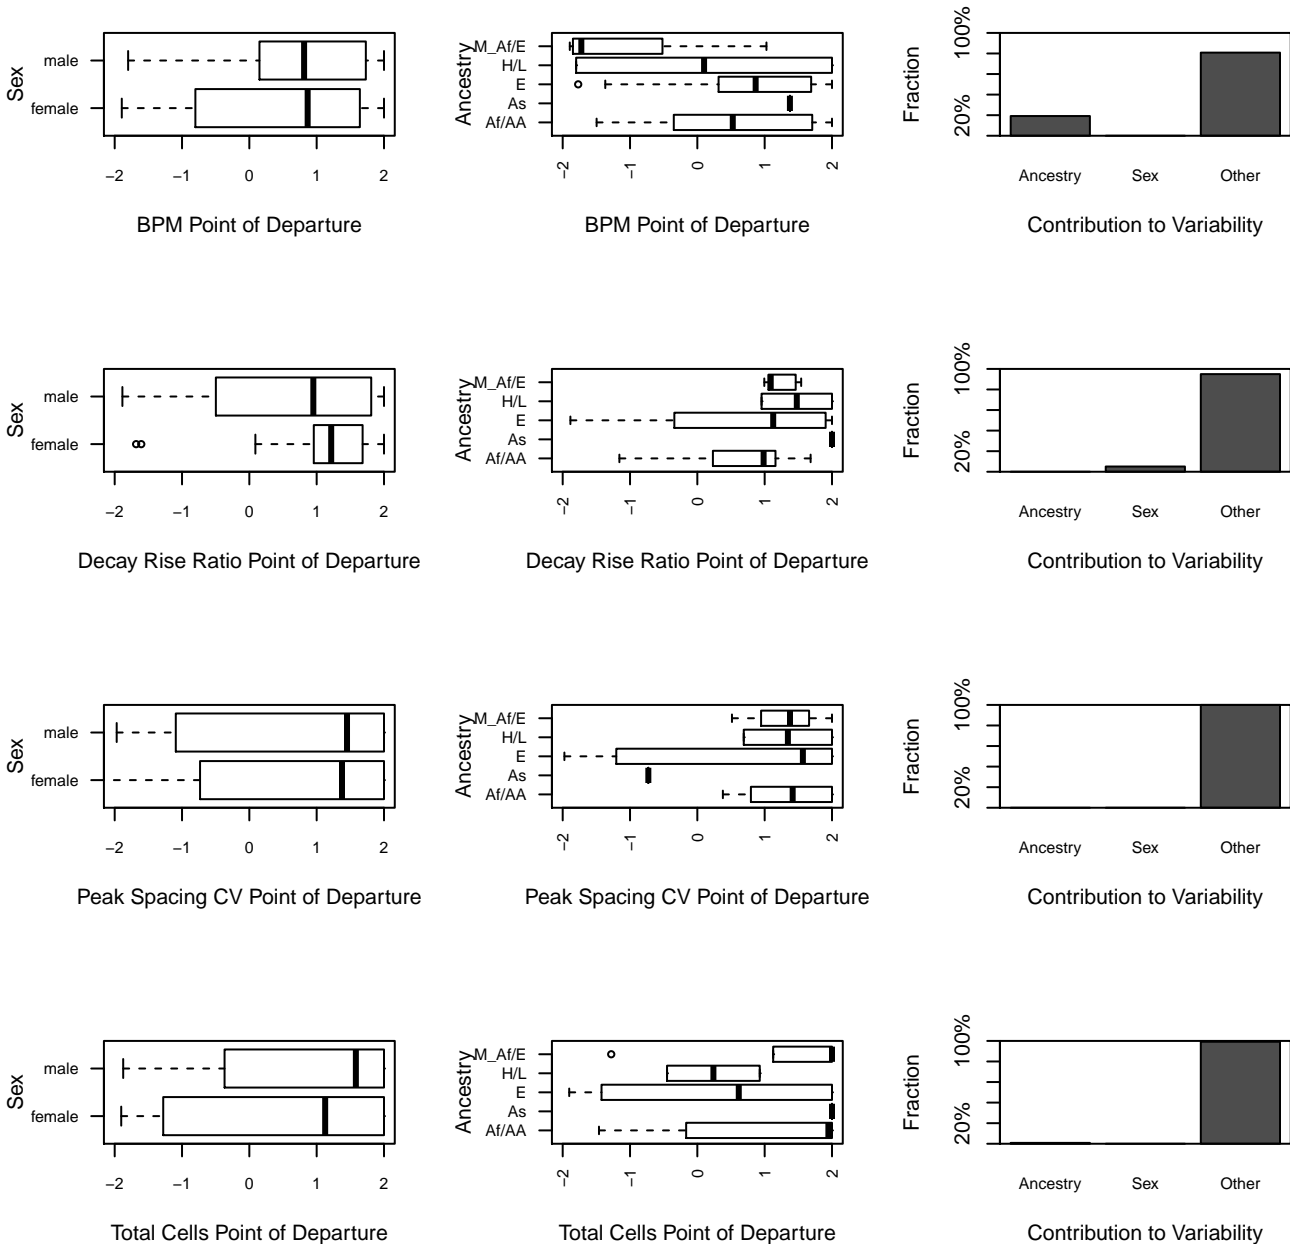

# Chlorpyrifos 47

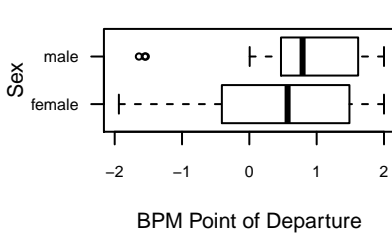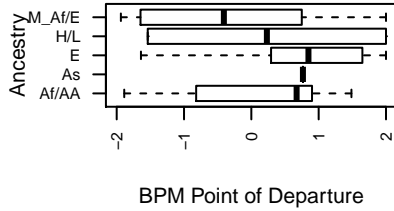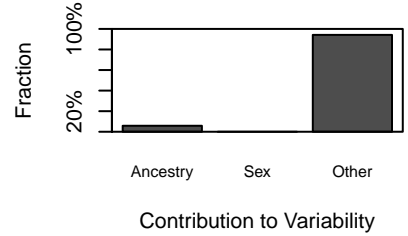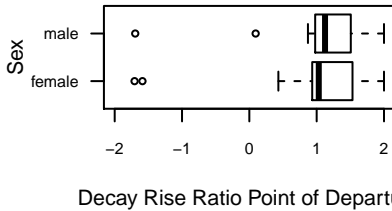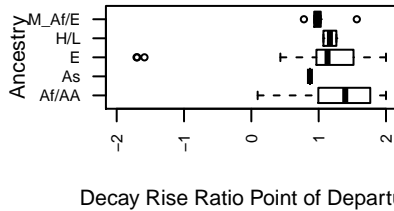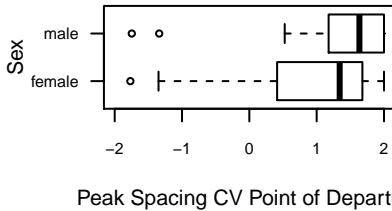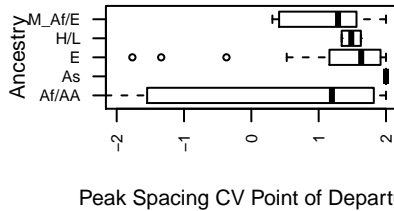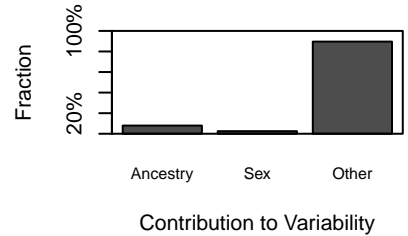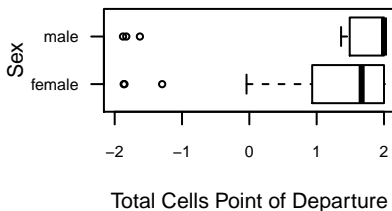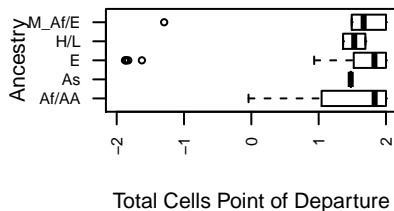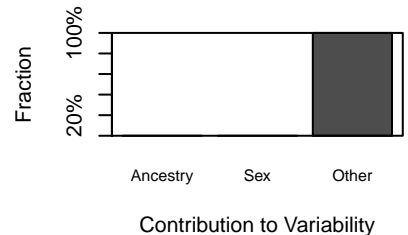



## 2-Methoxyethanol 48

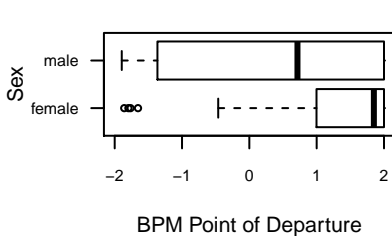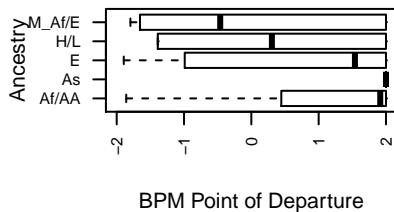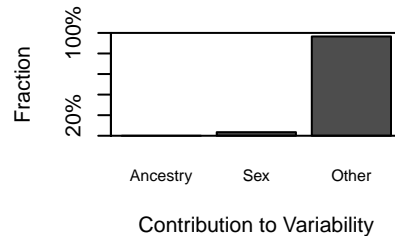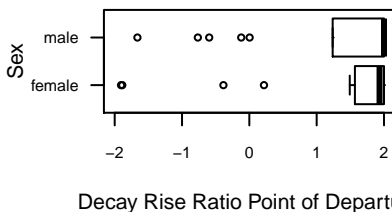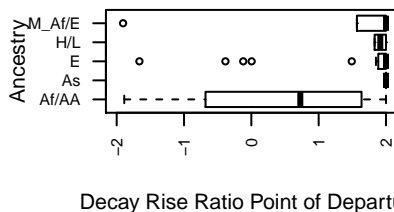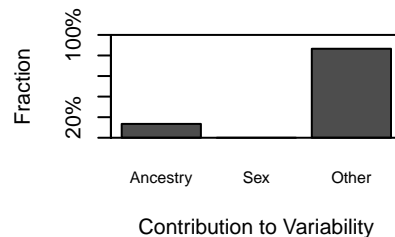

Decay Rise Ratio Point of Departure

Decay Rise Ratio Point of Departure

Contribution to Variability

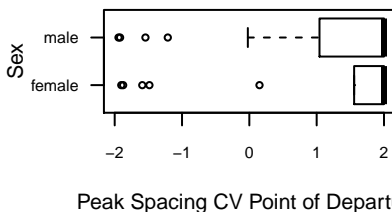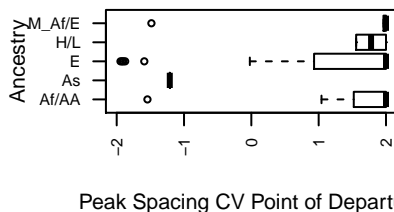

Peak Spacing CV Point of Departure

Peak Spacing CV Point of Departure

Contribution to Variability

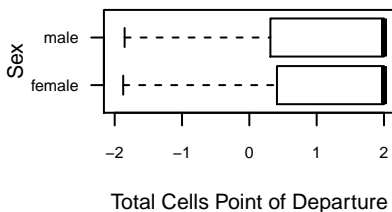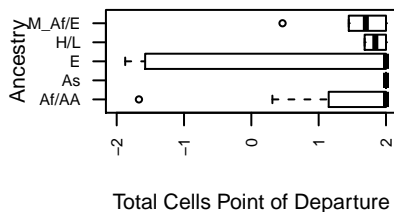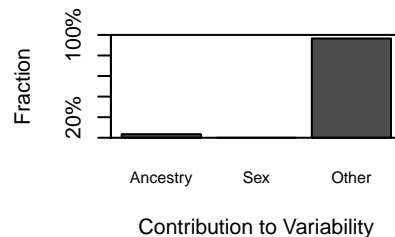

Total Cells Point of Departure

Total Cells Point of Departure

Contribution to Variability

# Ethoxyquin 49

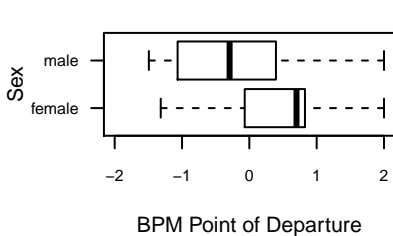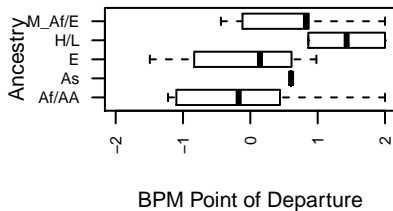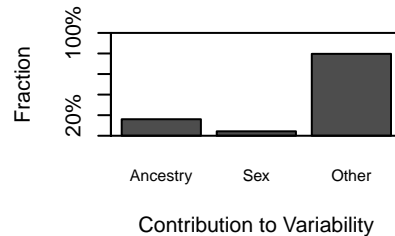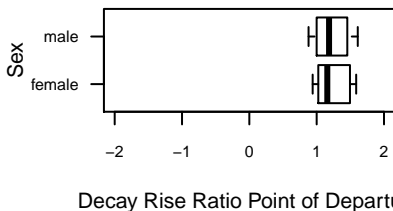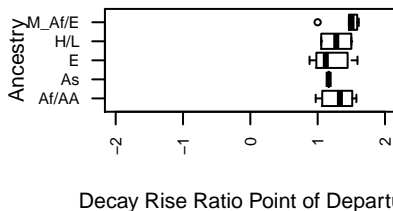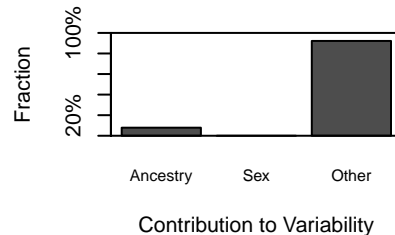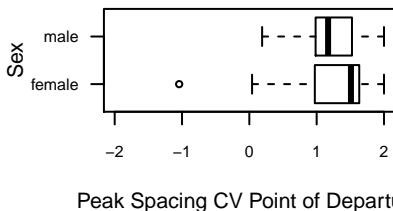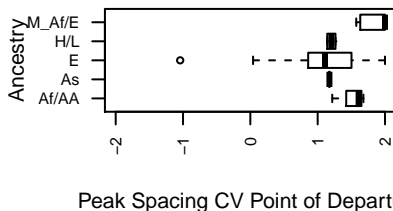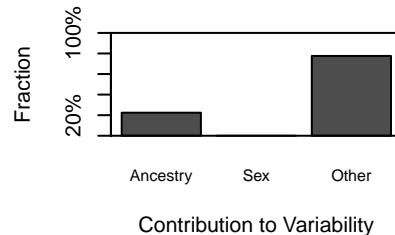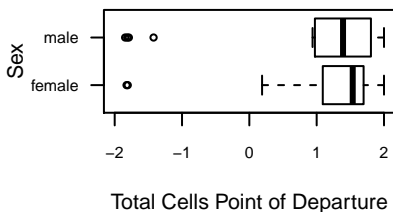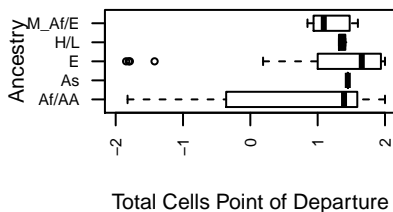

# Dibenz(a,h)anthracene 50

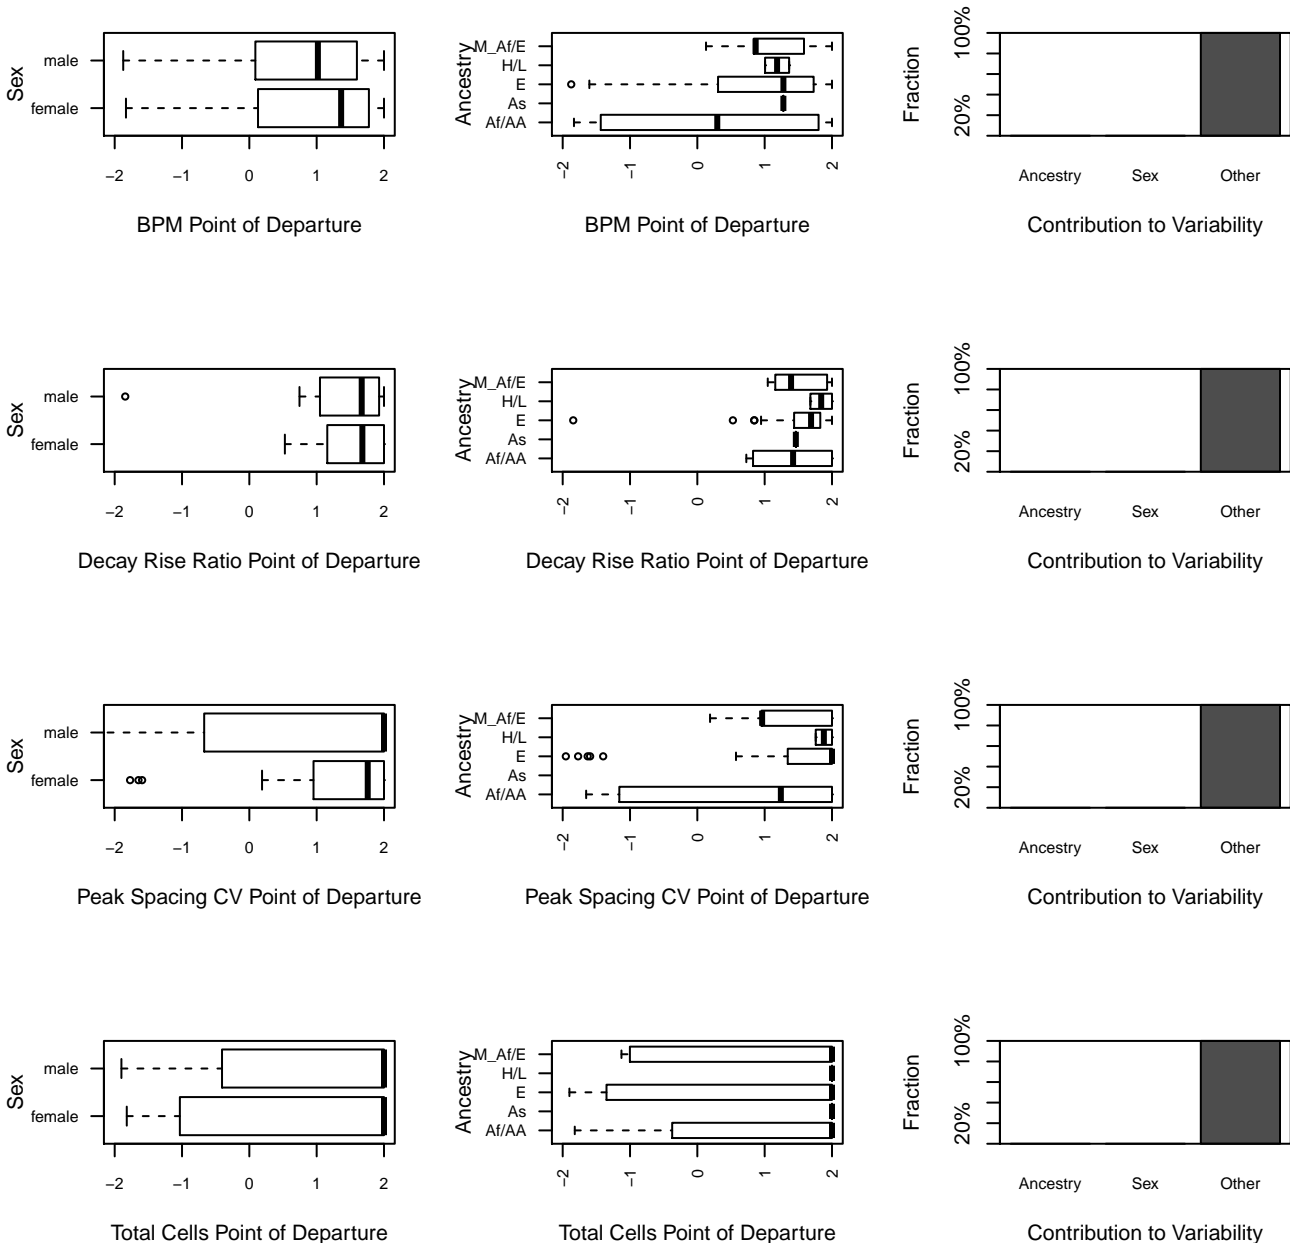

# Gentian\_Violet 51

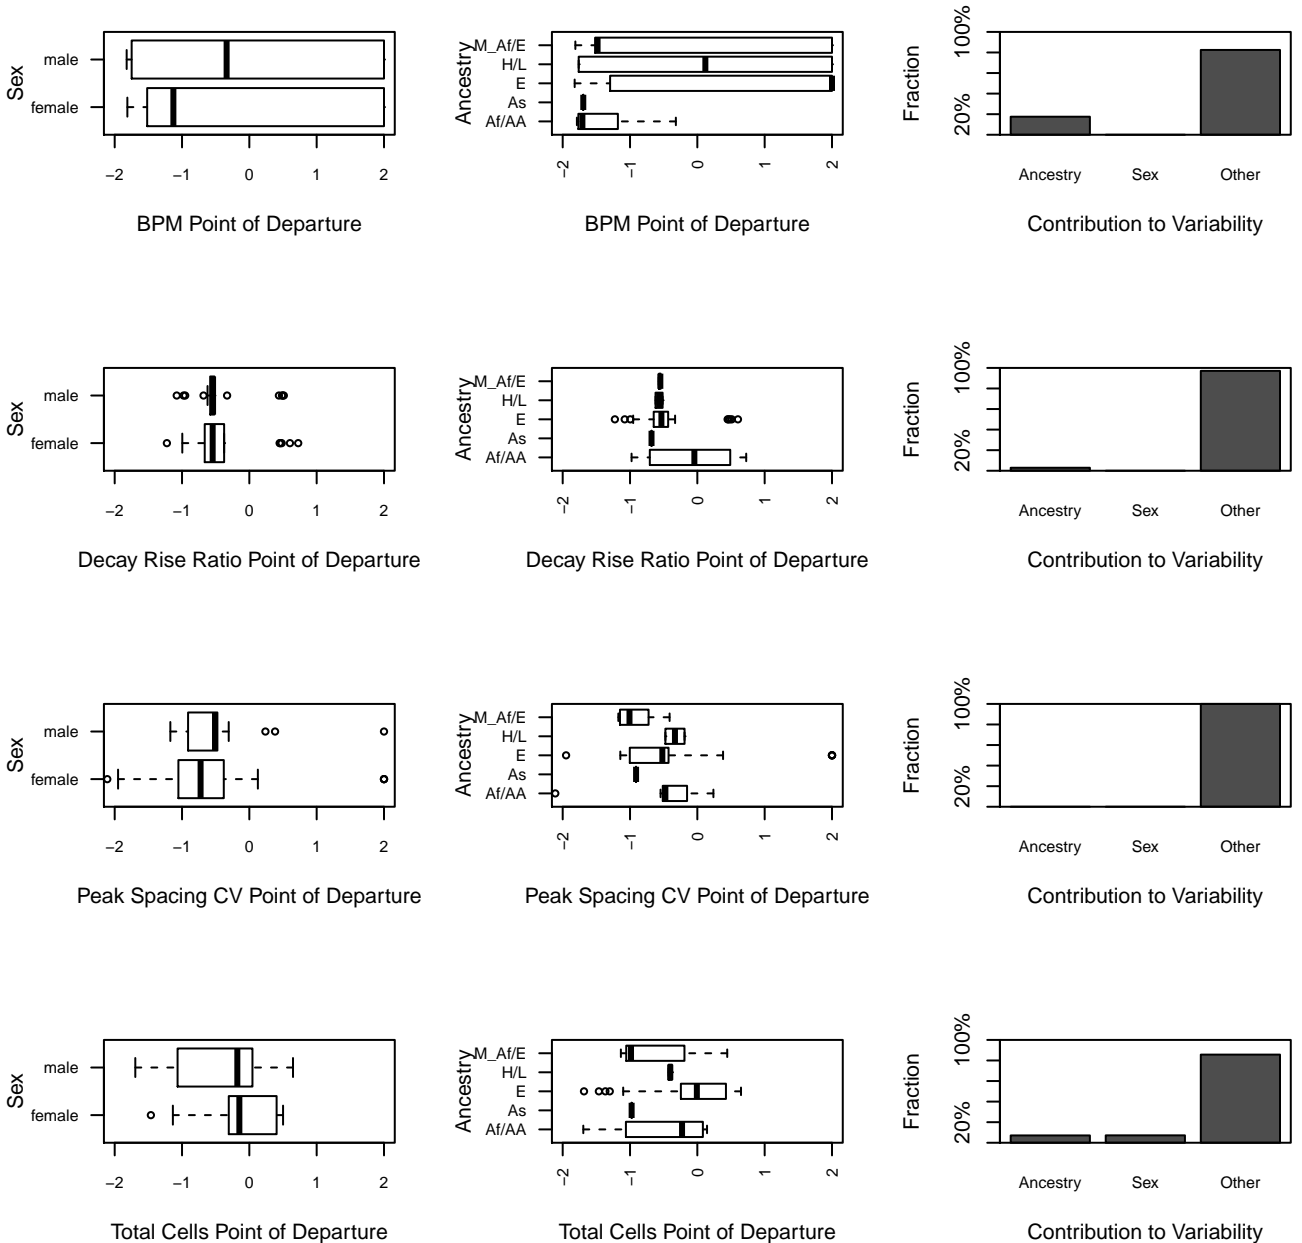

# 3-Iodo-2-propynyl-N-butylcarbamate 52

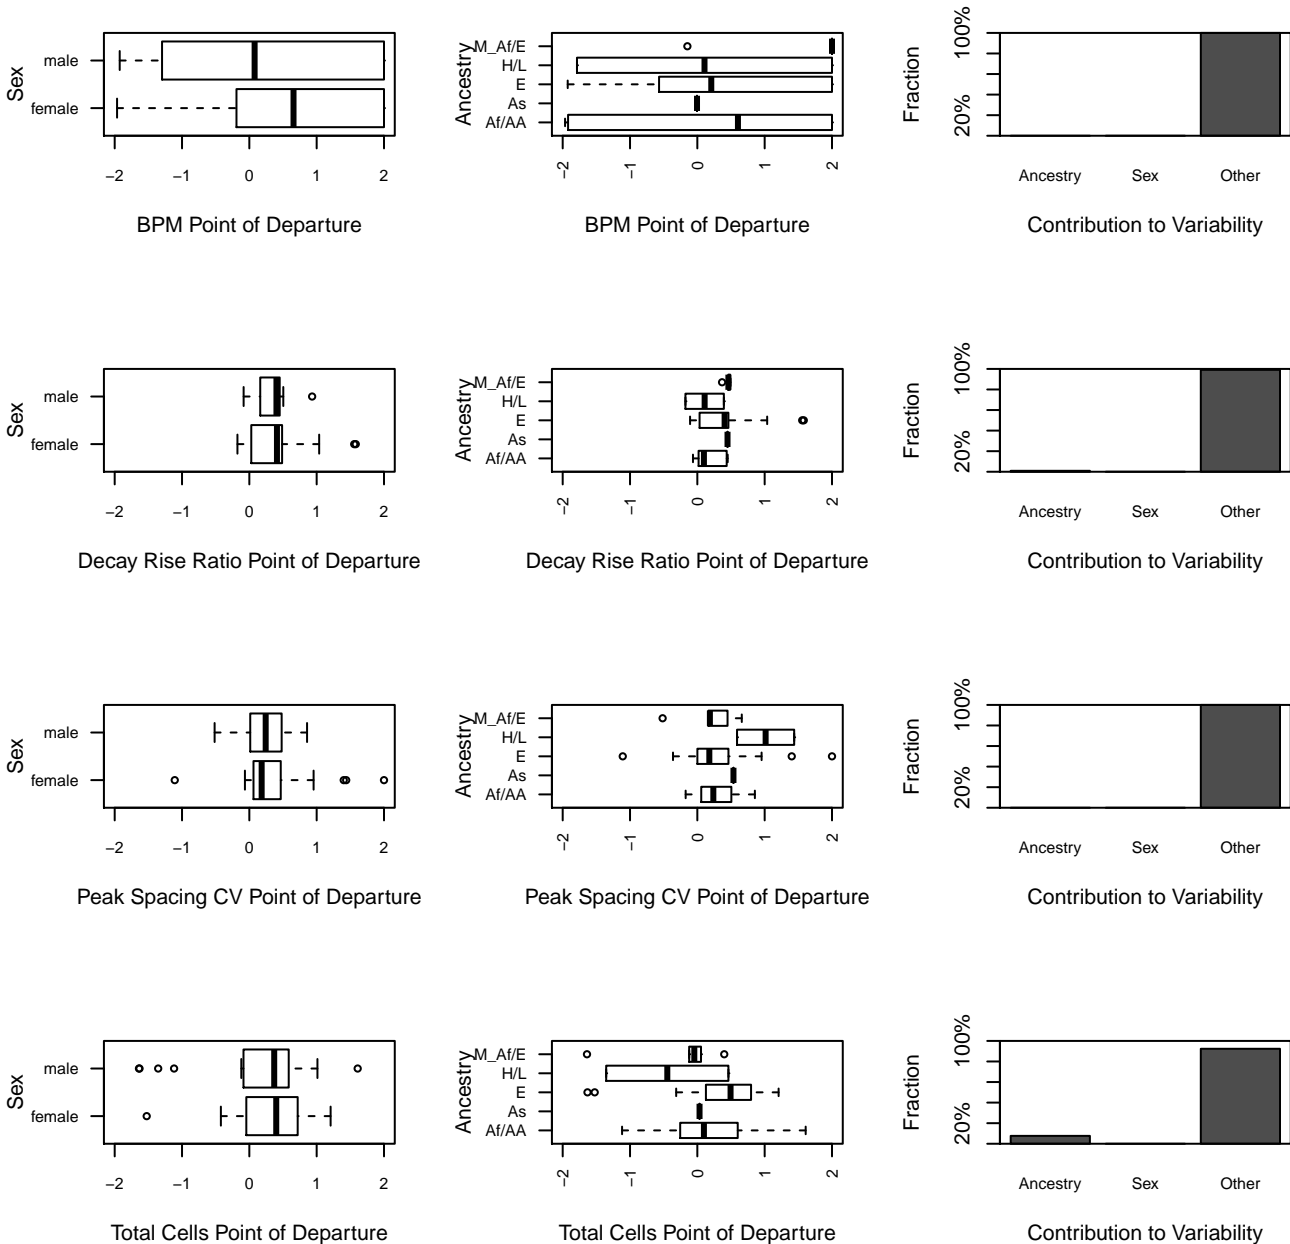

# Maltol 53

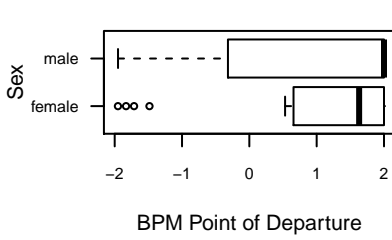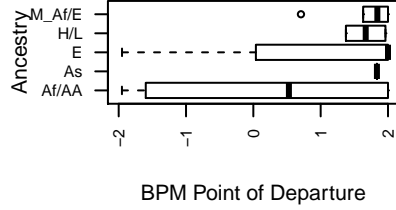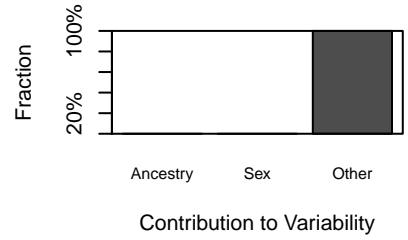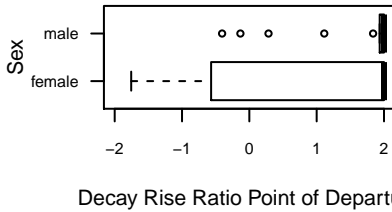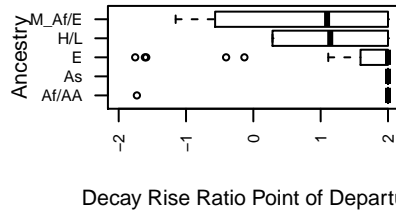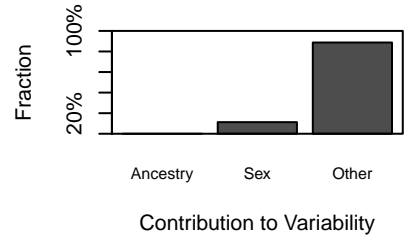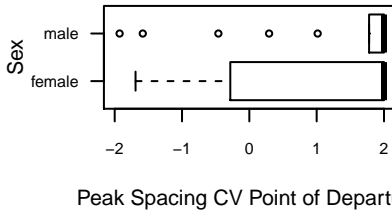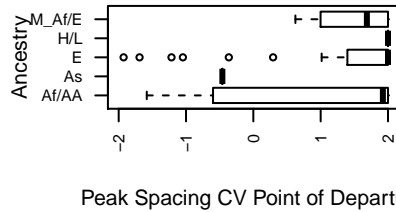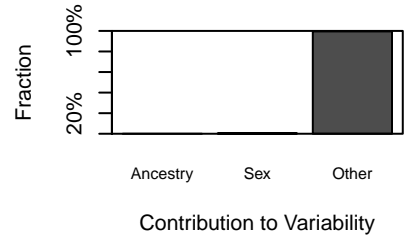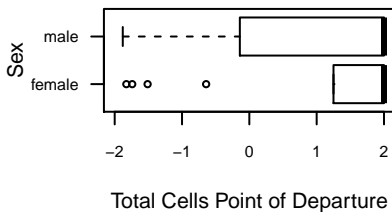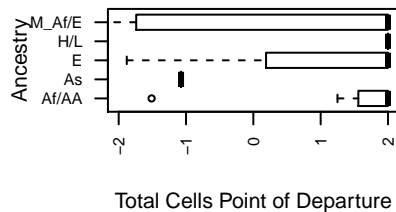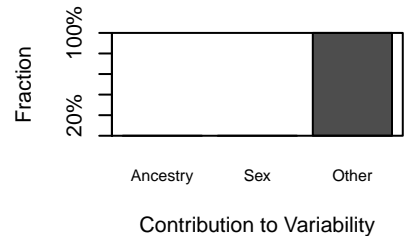

# Acenaphthylene 54

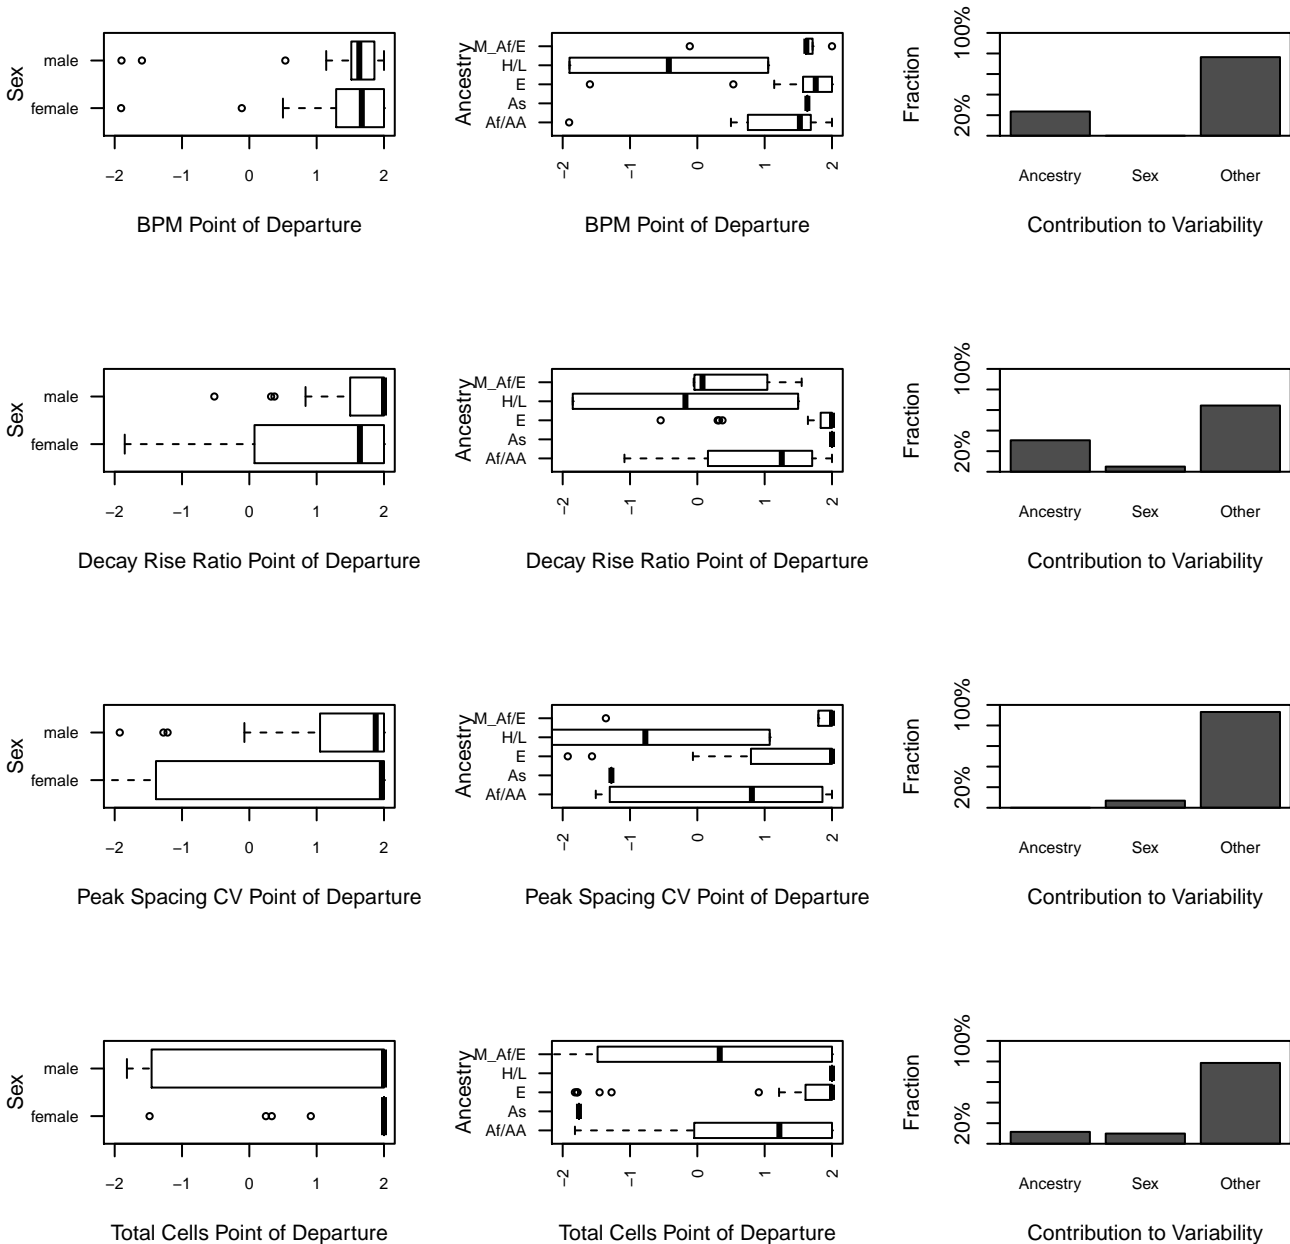

# 4-Hexylresorcinol 55

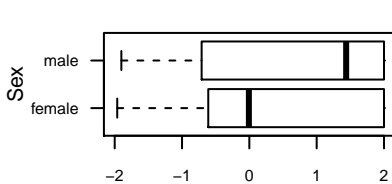

BPM Point of Departure

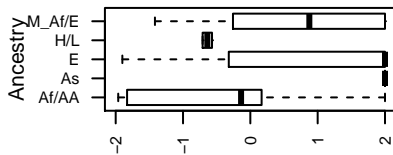

BPM Point of Departure

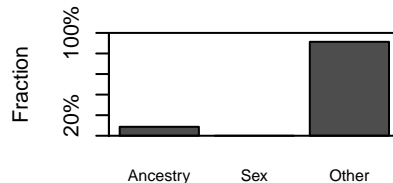

Contribution to Variability

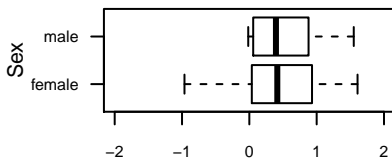

Decay Rise Ratio Point of Departure

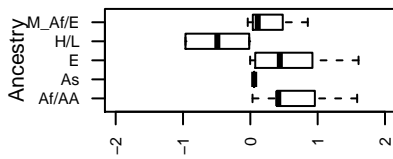

Decay Rise Ratio Point of Departure

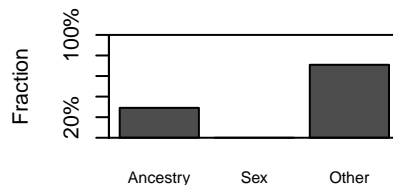

Contribution to Variability

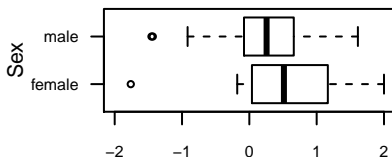

Peak Spacing CV Point of Departure

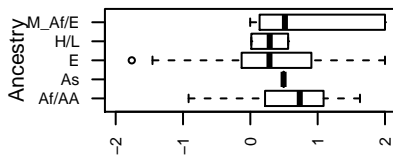

Peak Spacing CV Point of Departure

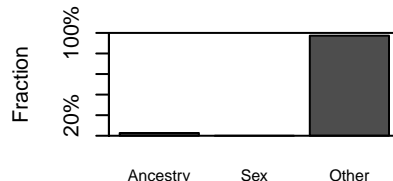

Contribution to Variability

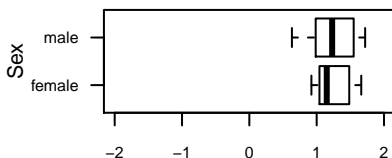

Total Cells Point of Departure

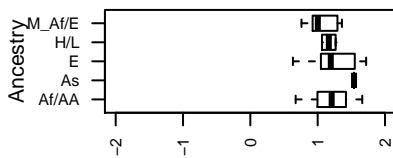

Total Cells Point of Departure

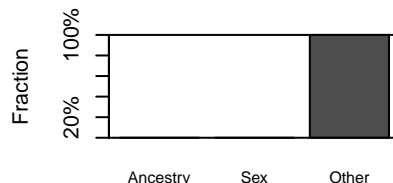

Contribution to Variability



# Thiabendazole 56

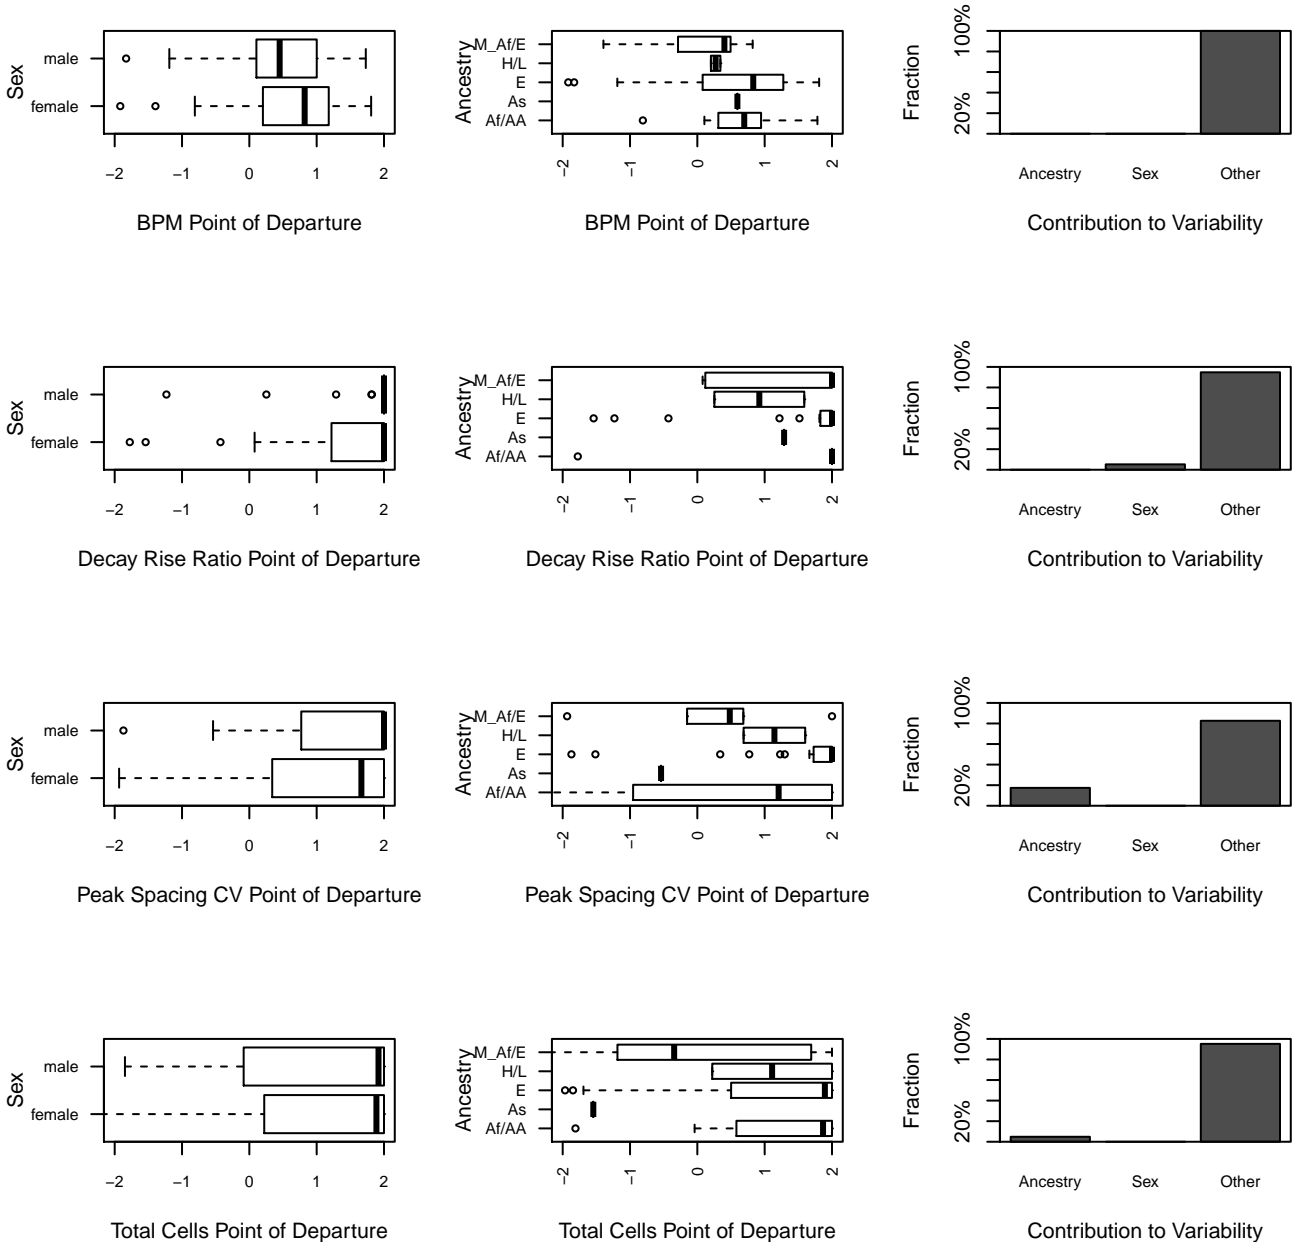

# Naphthalene 57

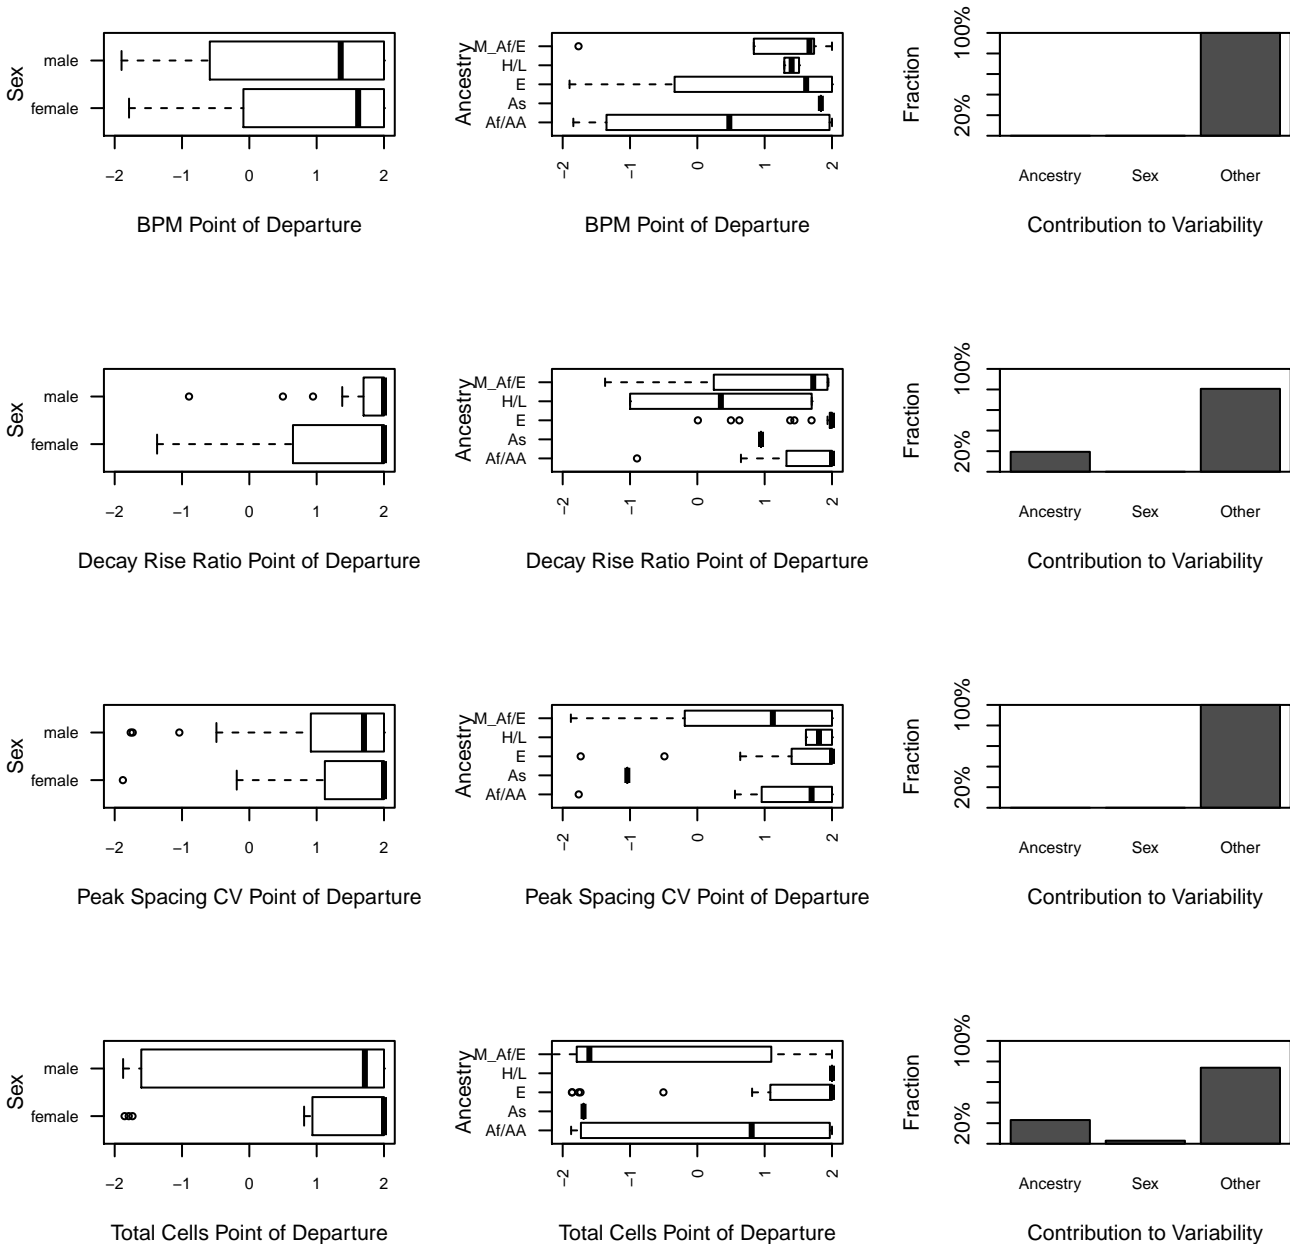

# Benzo(e)pyrene 58

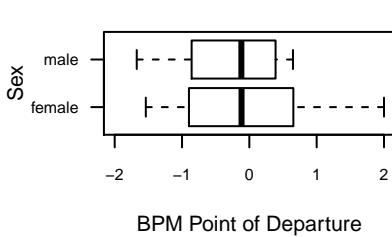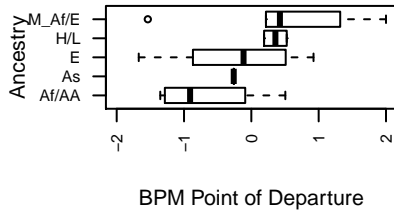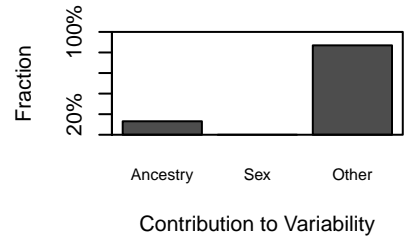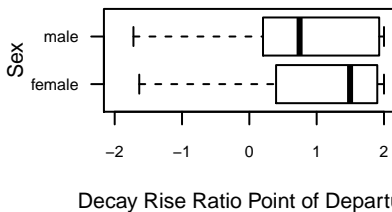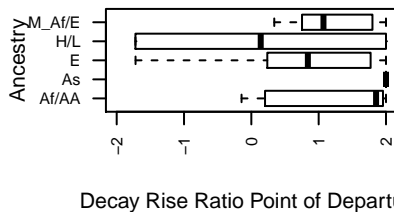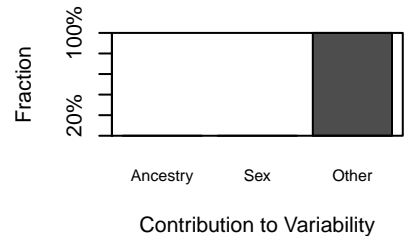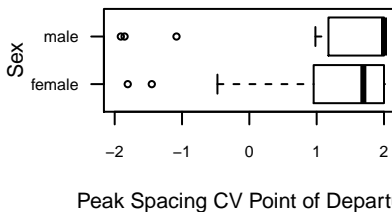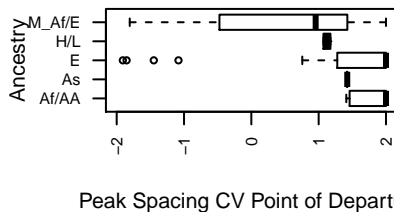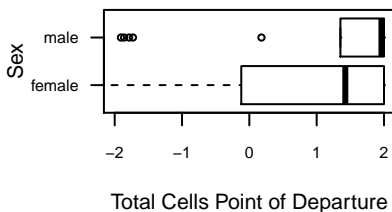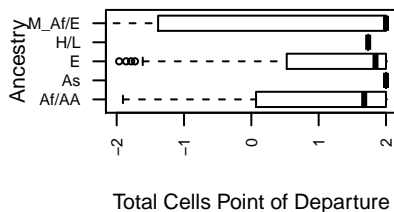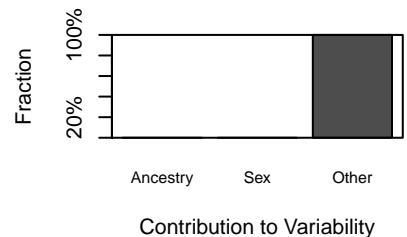

# Triphenyl\_phosphates\_isopropylated 59

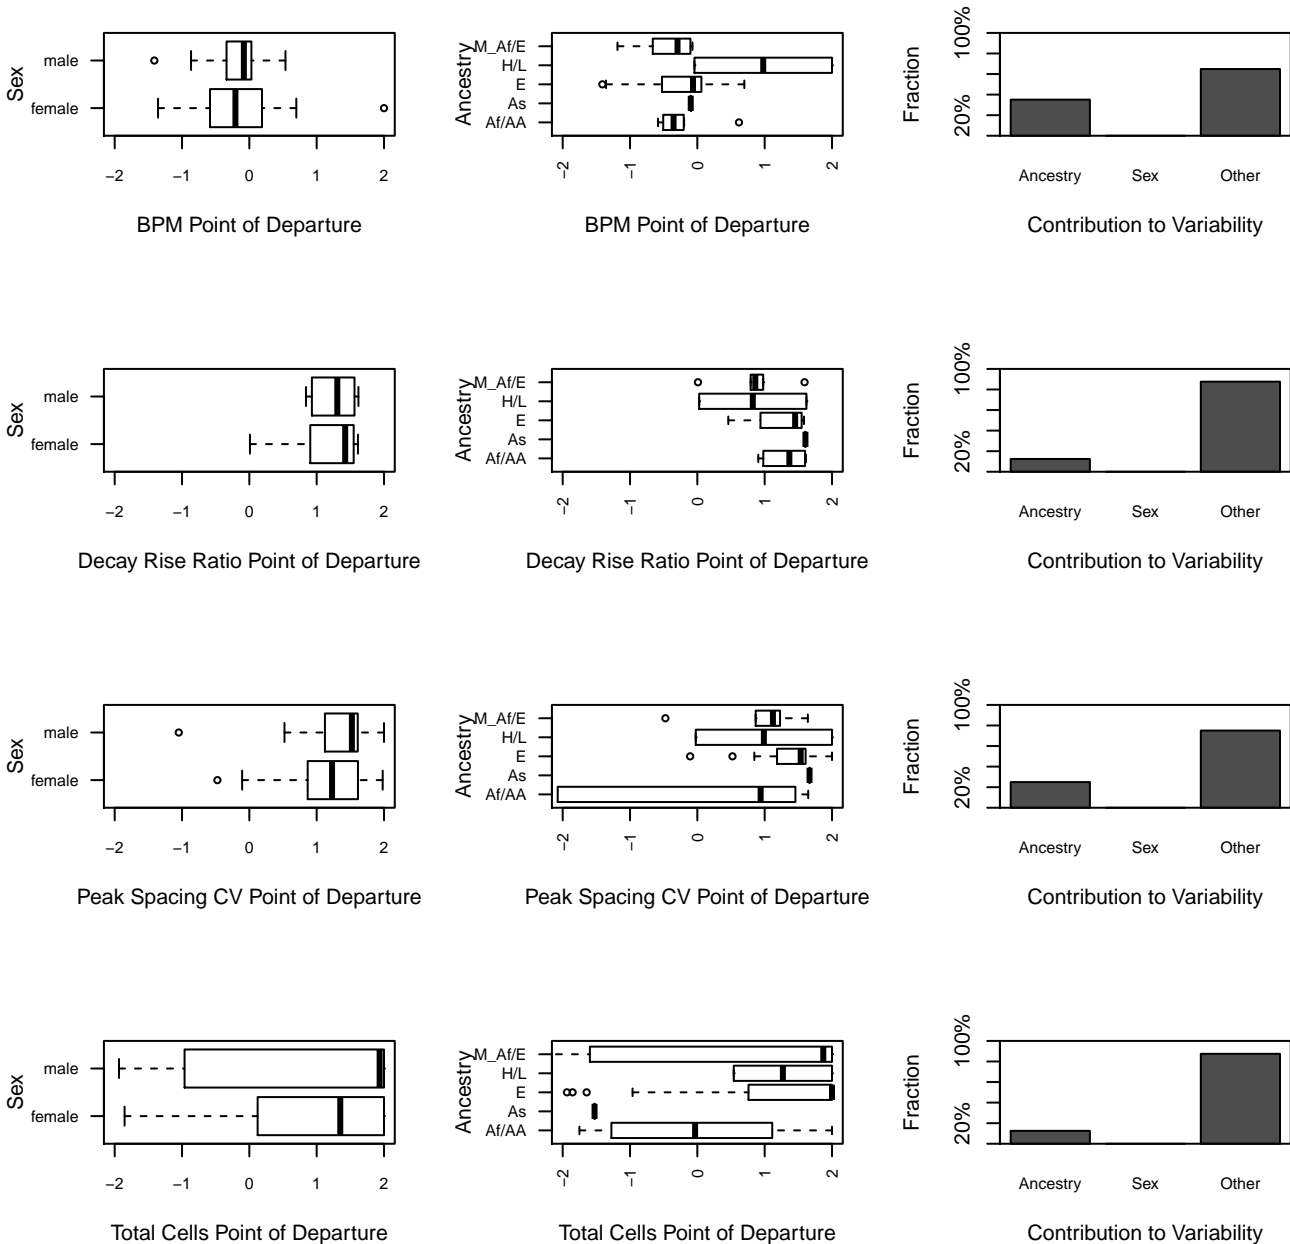

# Parathion 60

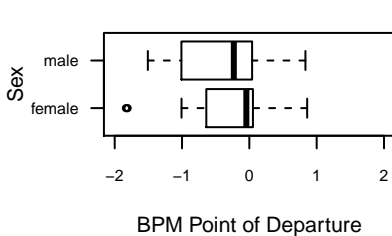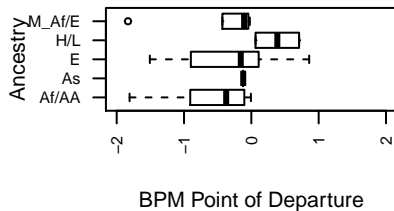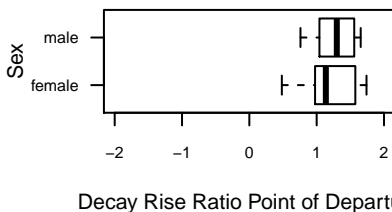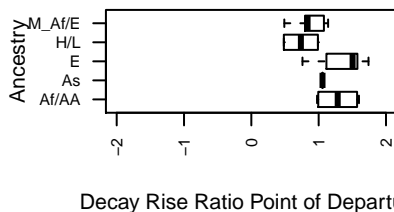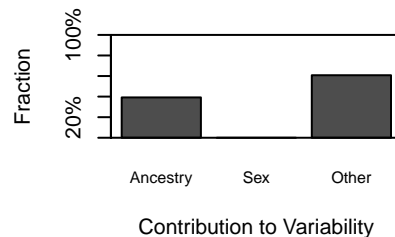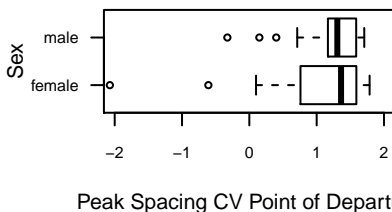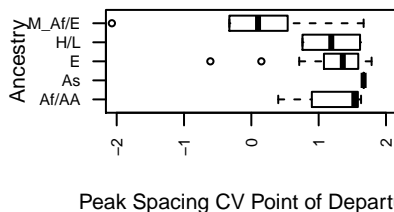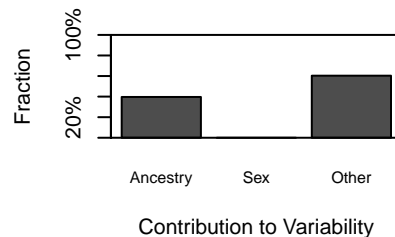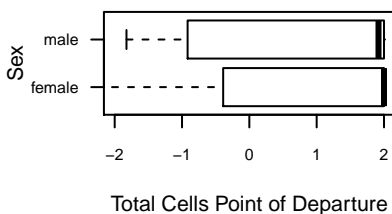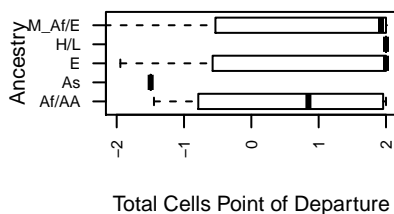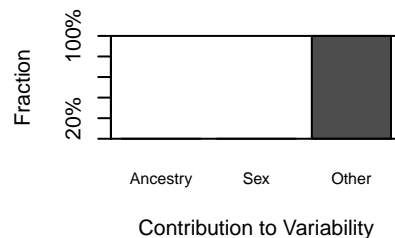

# 8-Hydroxyquinoline 61

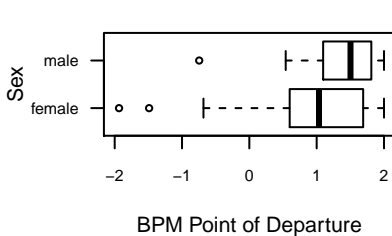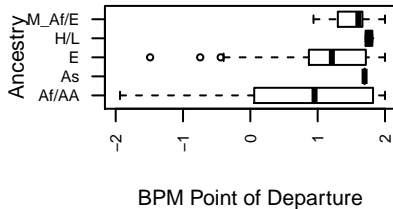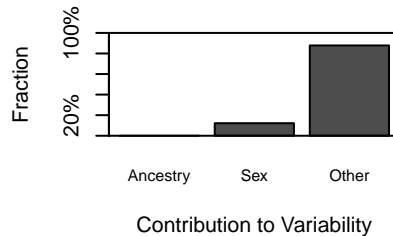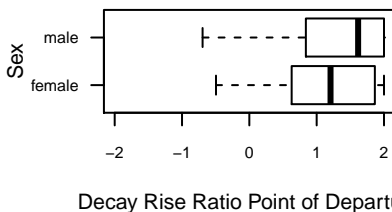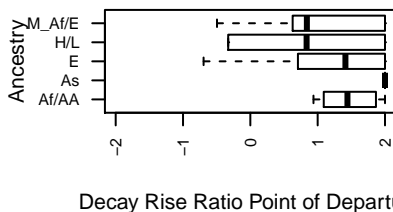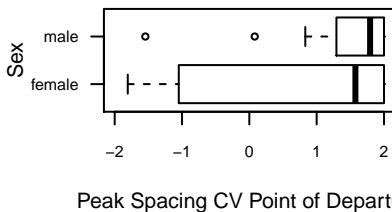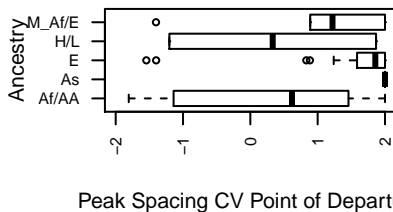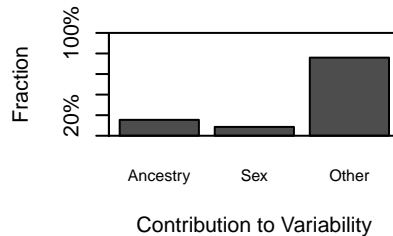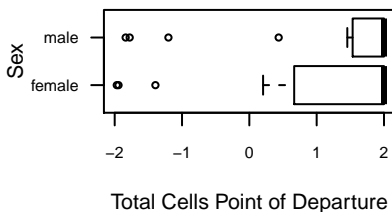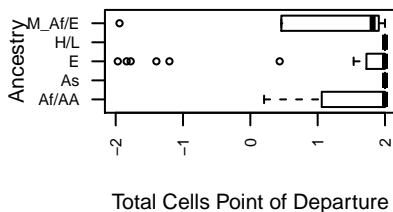

# 6-Propyl-2-thiouracil 6Z

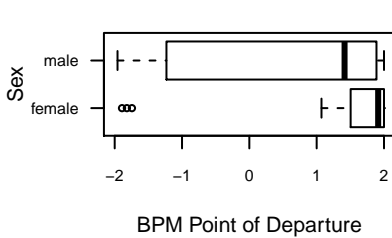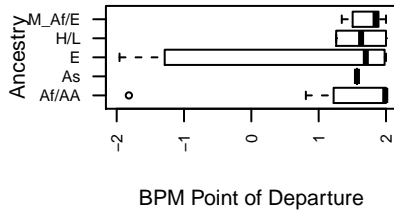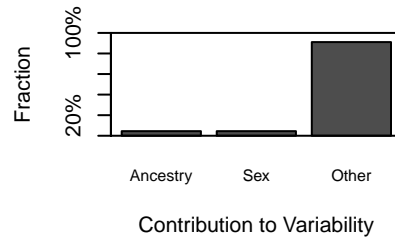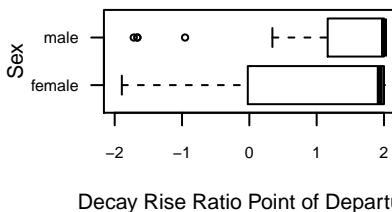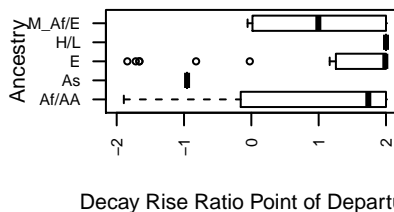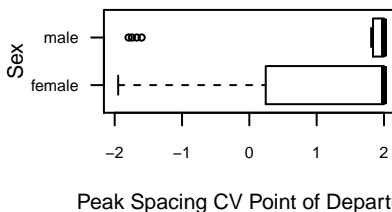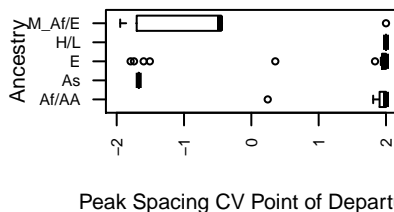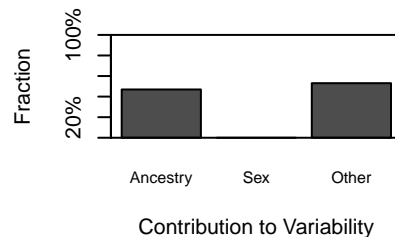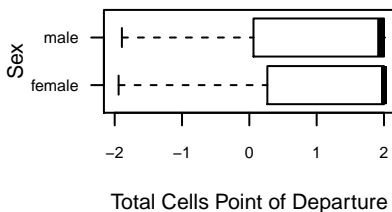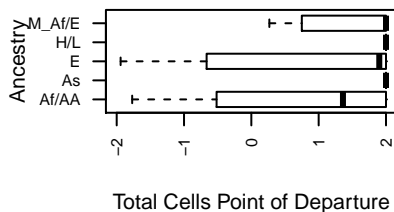

## 2-Ethylhexyl\_diphenyl\_phosphate 63

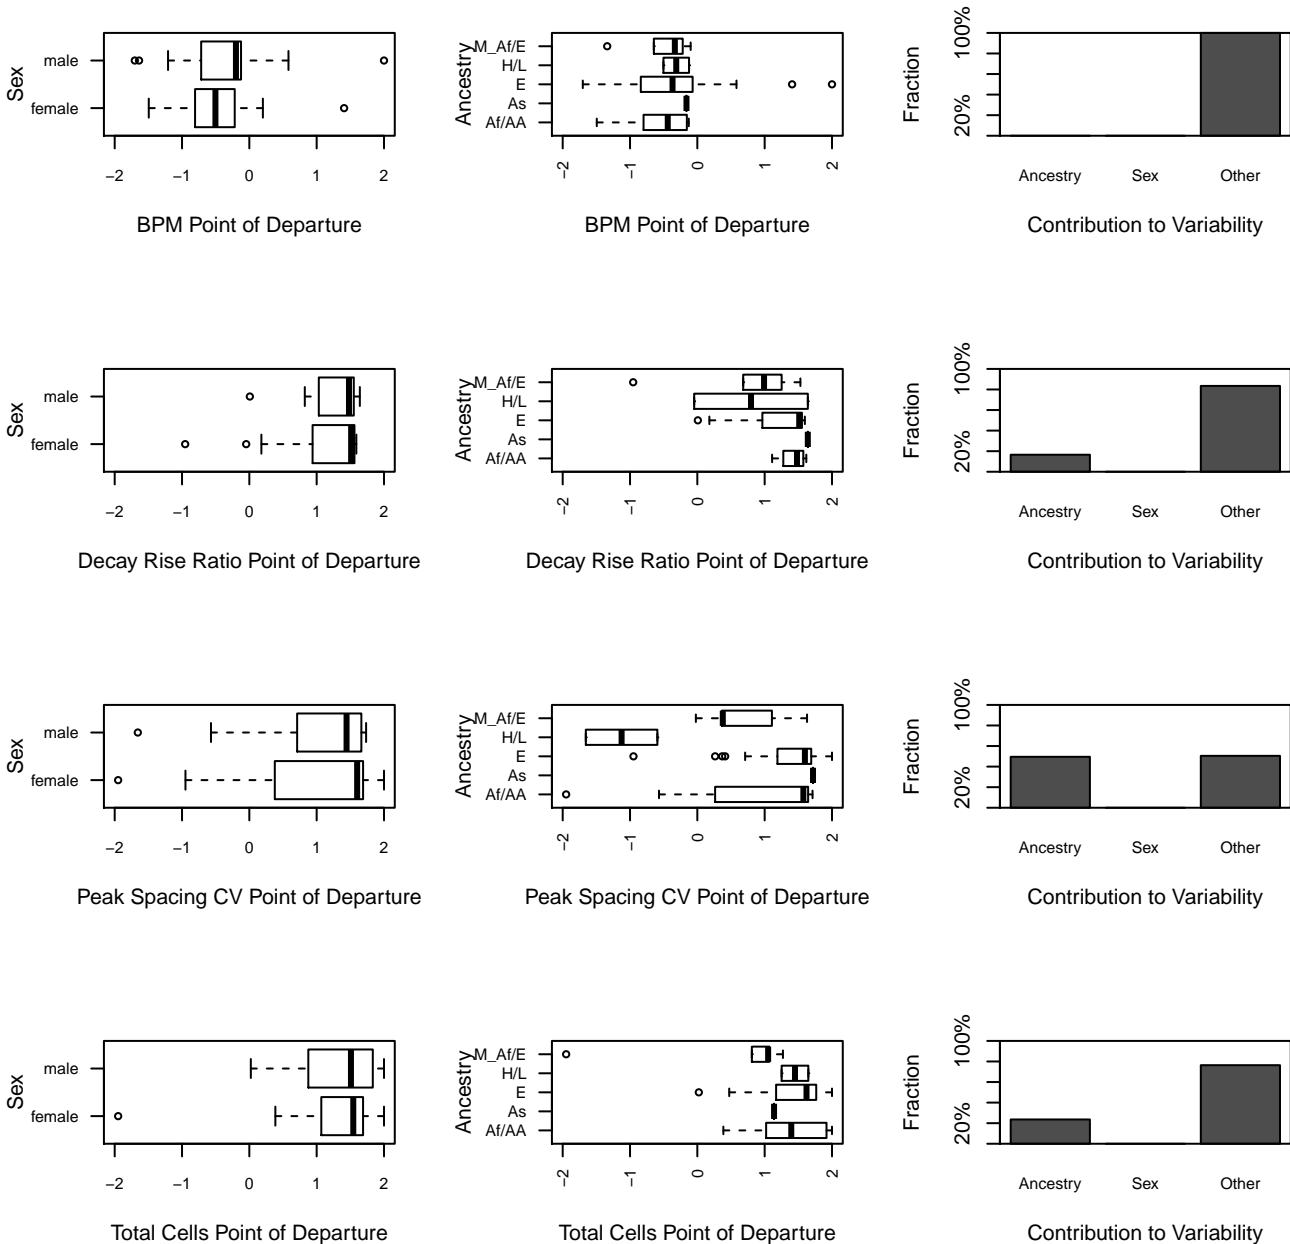



# Aspartame 64

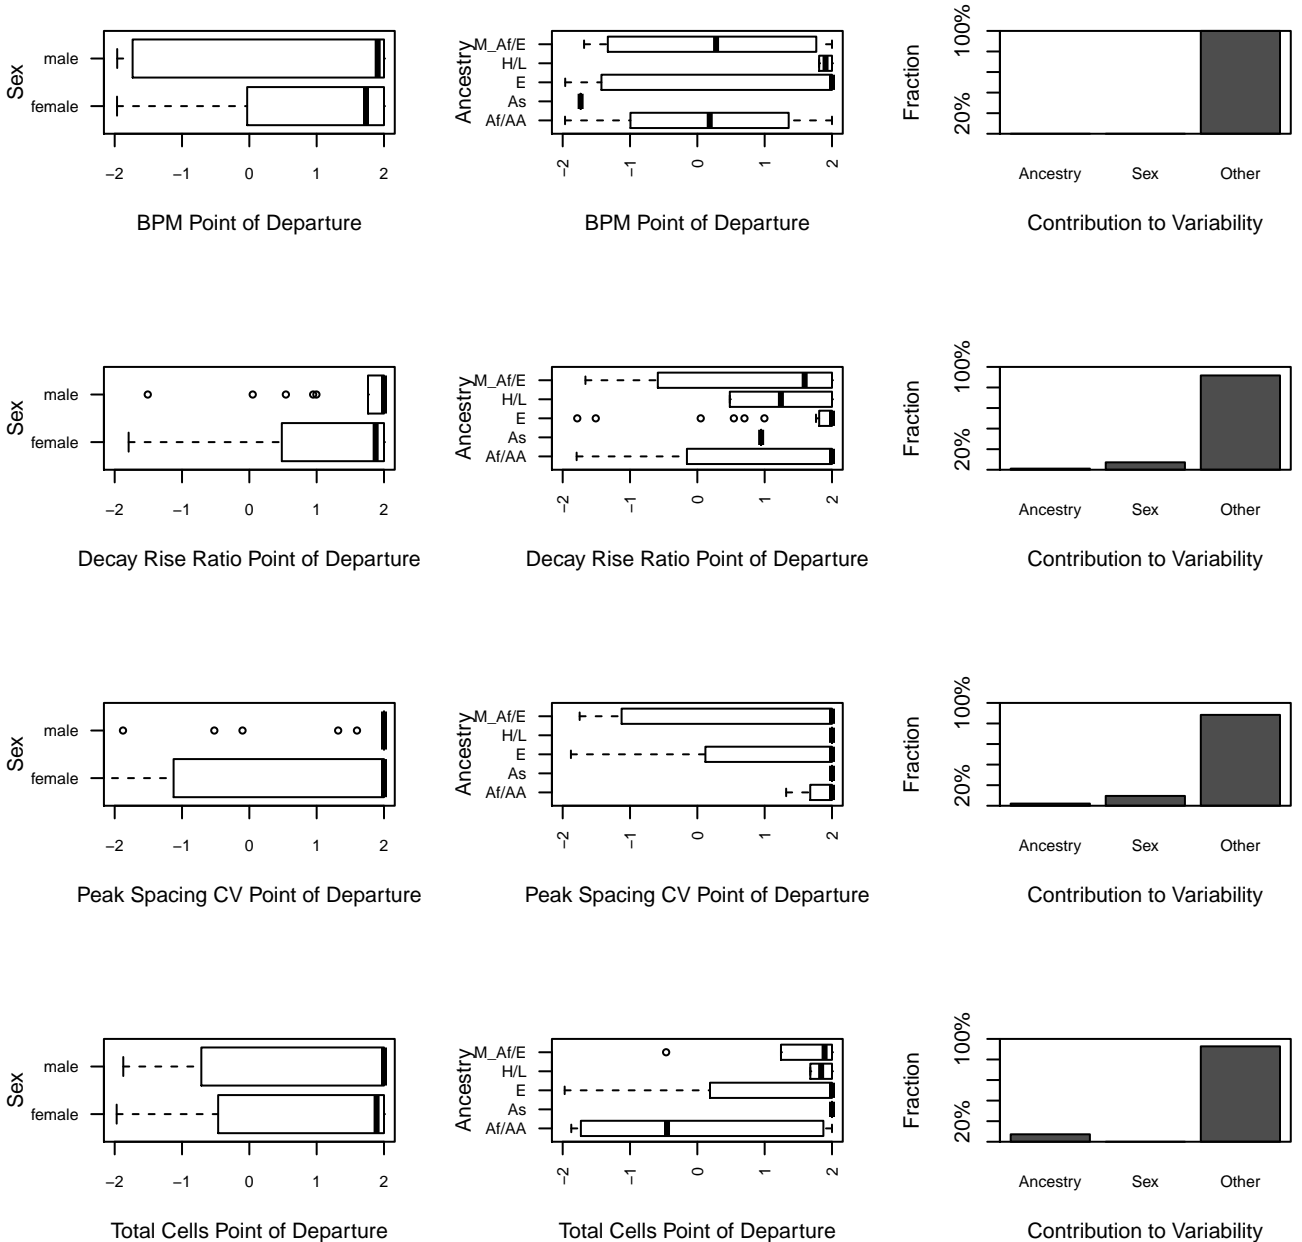

# Hexanedioic\_acid 65

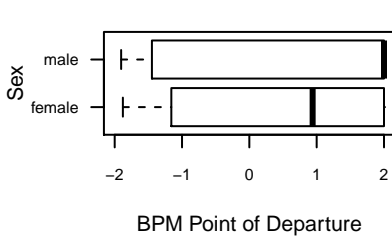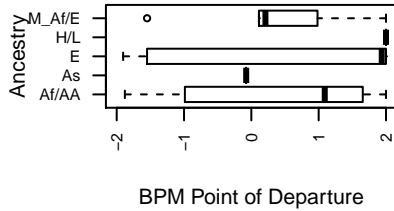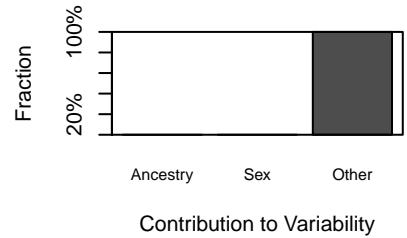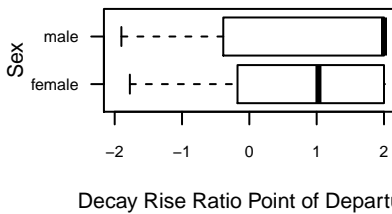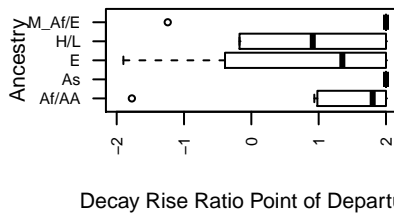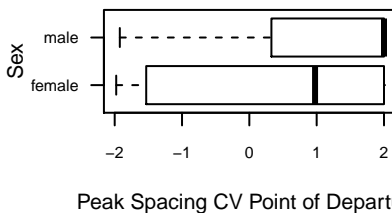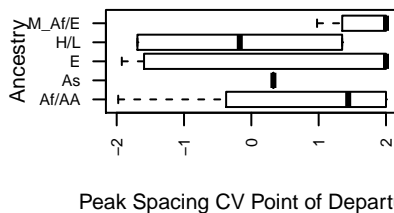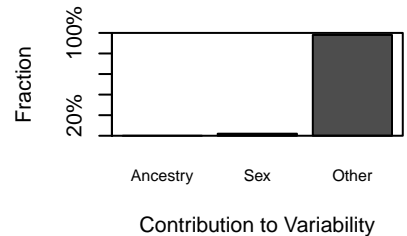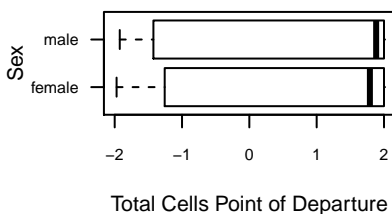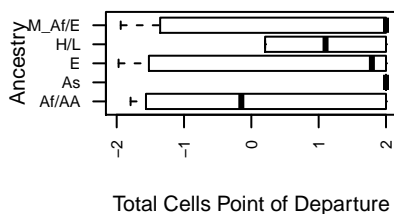

# Dieldrin 66

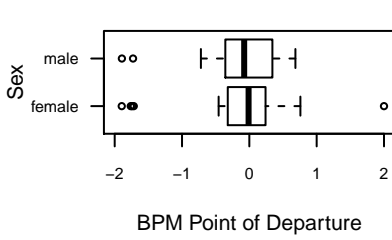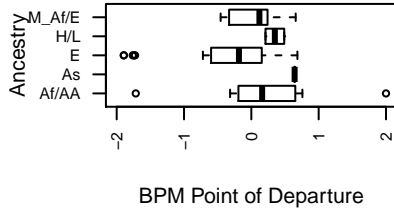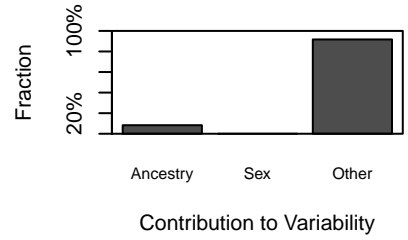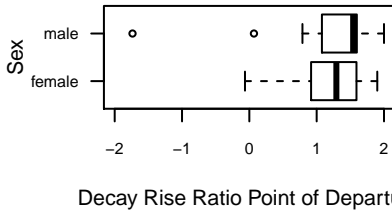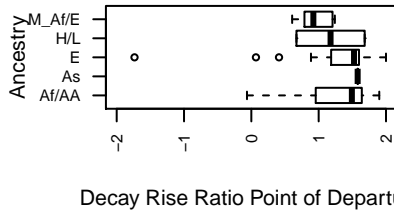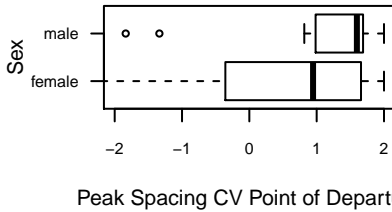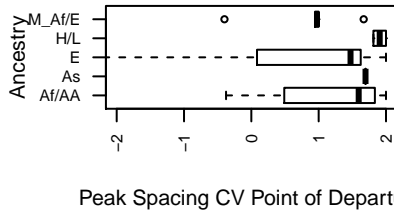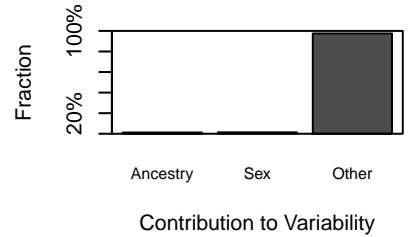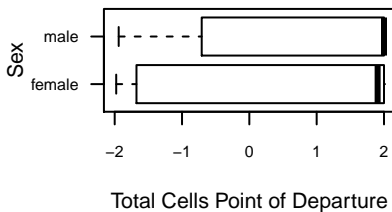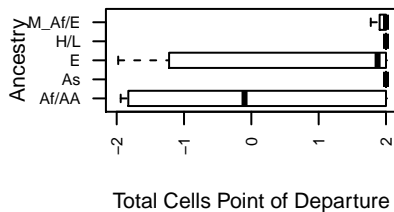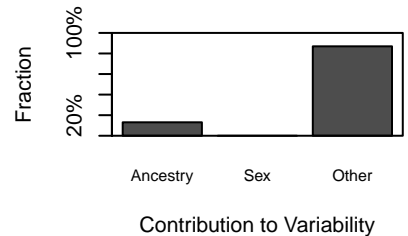

# Acenaphthene 67

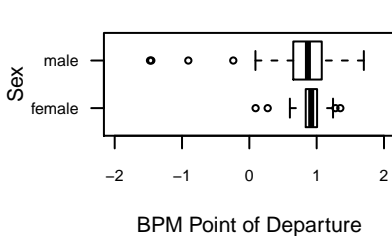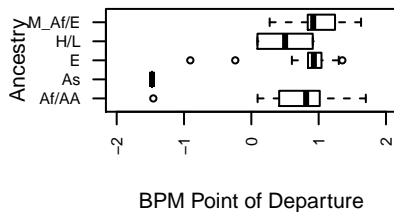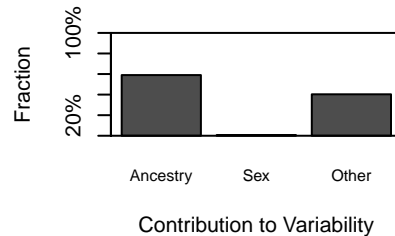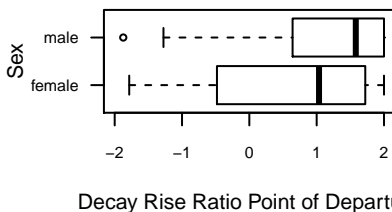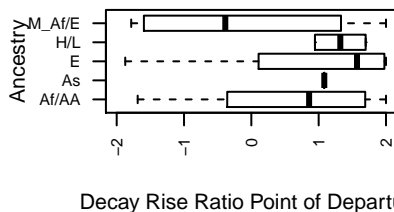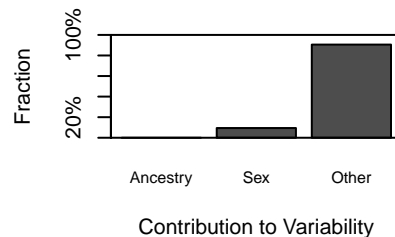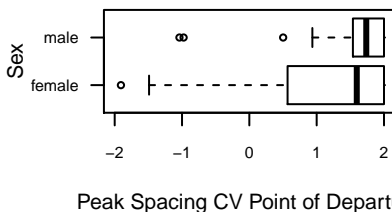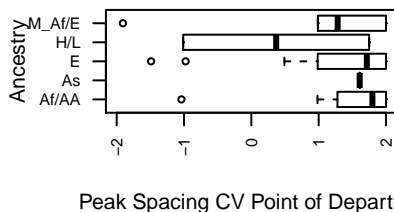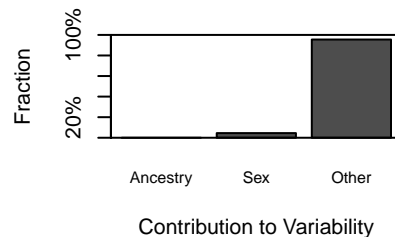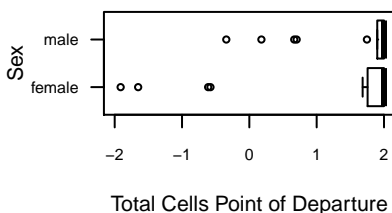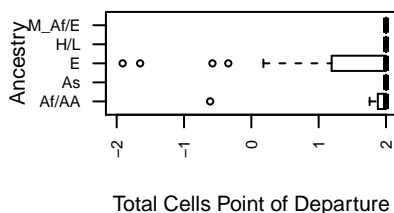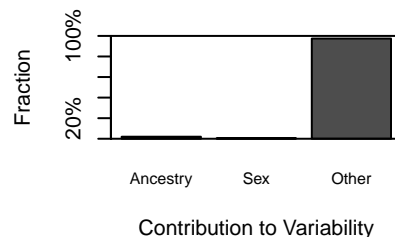

# Sodium\_saccharin\_hydrate 68

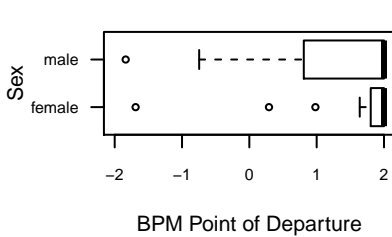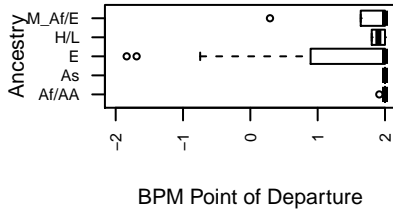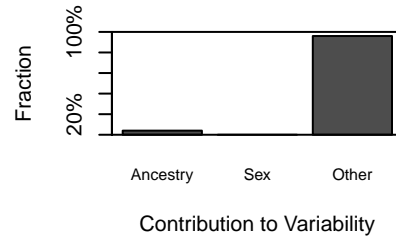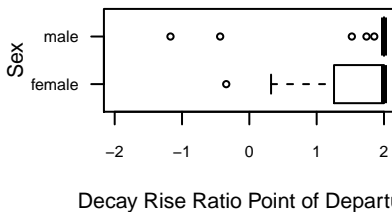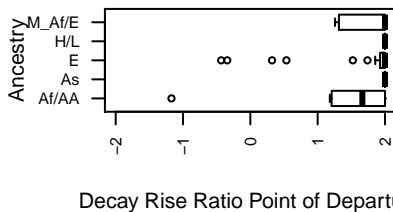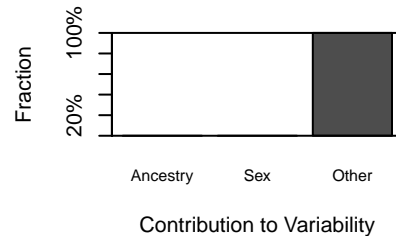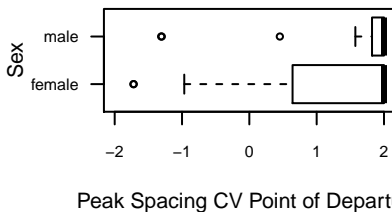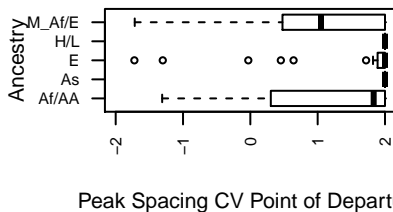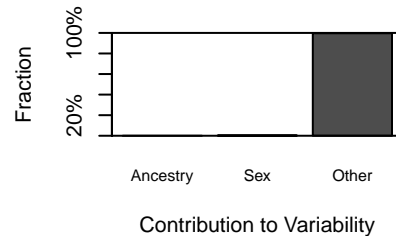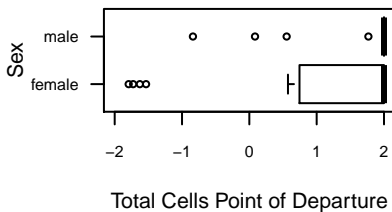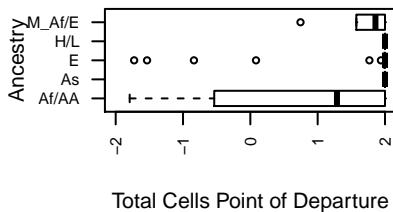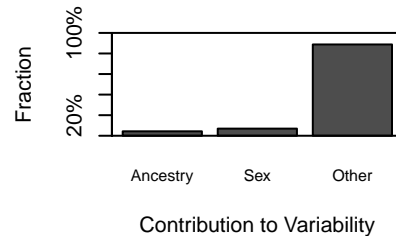

# Heptachlor 69

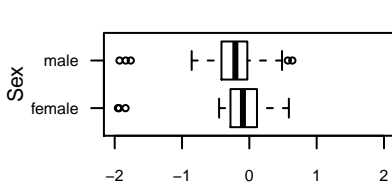

BPM Point of Departure

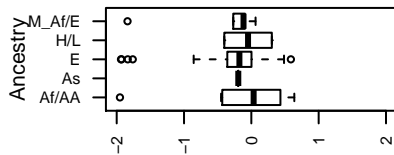

BPM Point of Departure

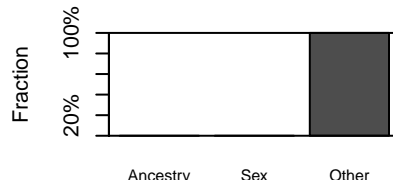

Contribution to Variability

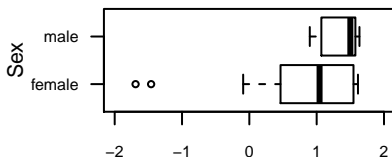

Decay Rise Ratio Point of Departure

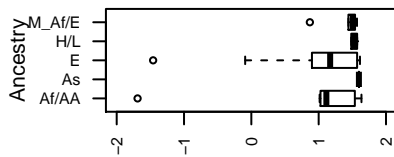

Decay Rise Ratio Point of Departure

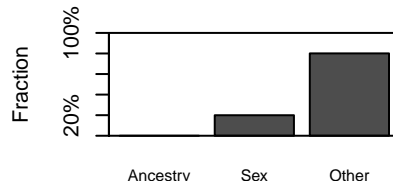

Contribution to Variability

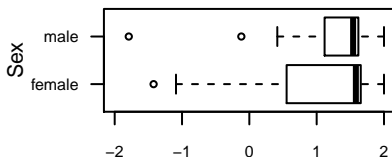

Peak Spacing CV Point of Departure

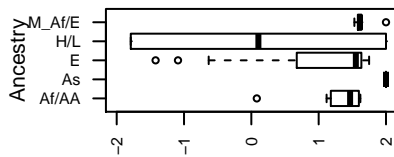

Peak Spacing CV Point of Departure

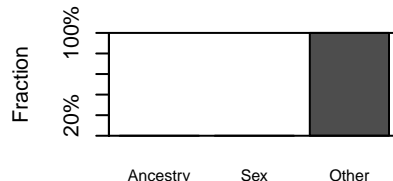

Contribution to Variability

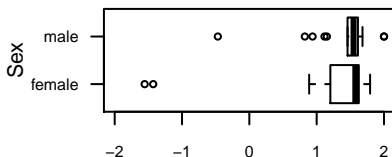

Total Cells Point of Departure

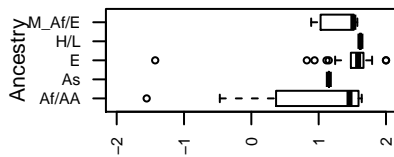

Total Cells Point of Departure

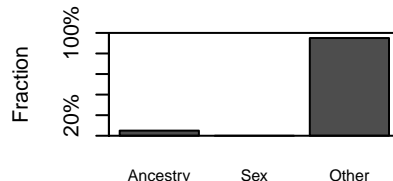

Contribution to Variability

# D-Glucitol 70

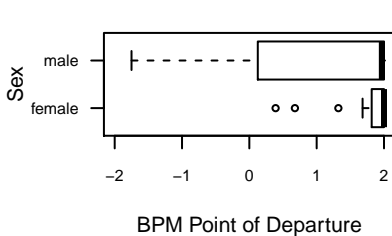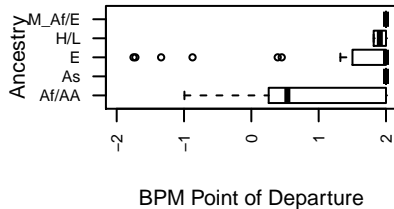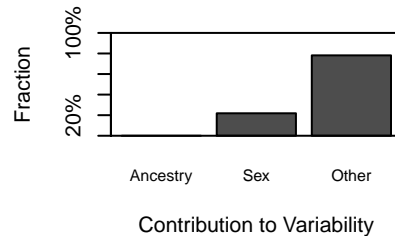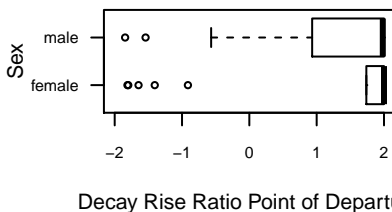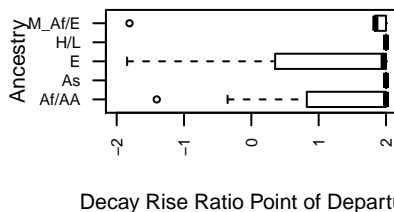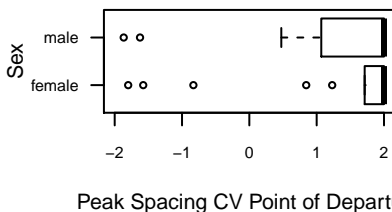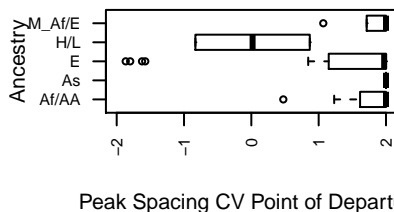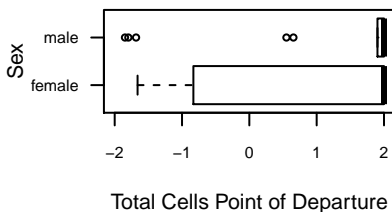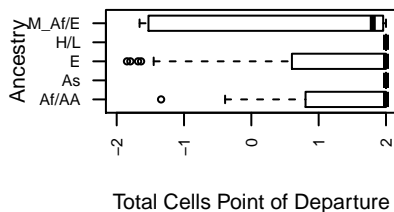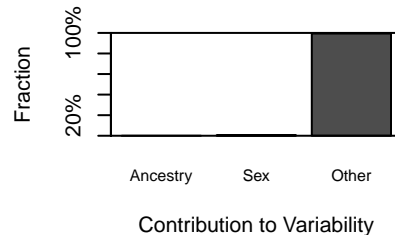

# Colchicine 71

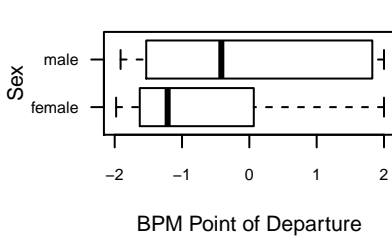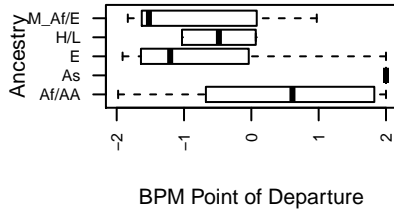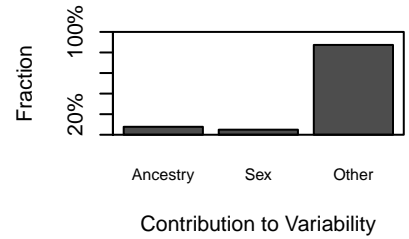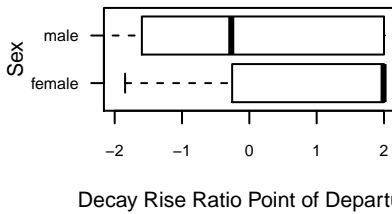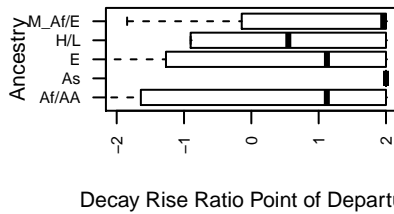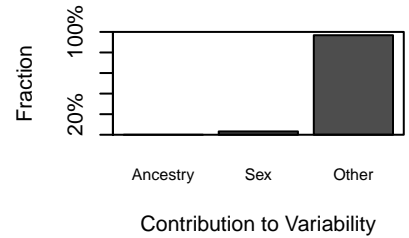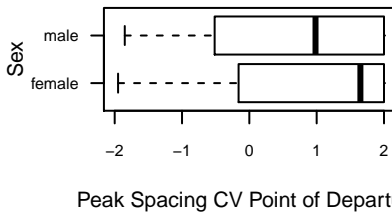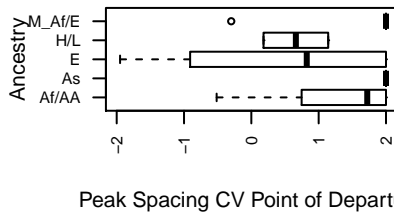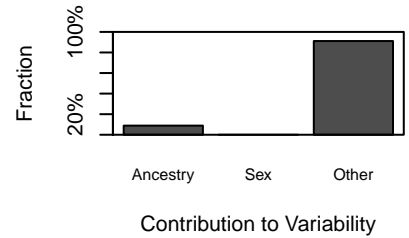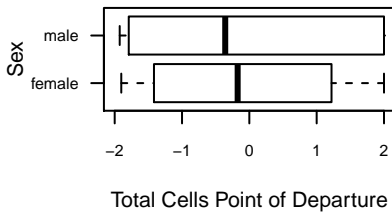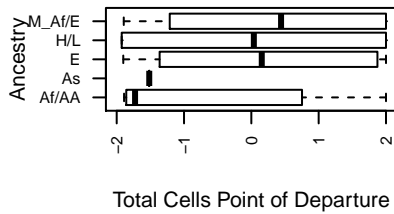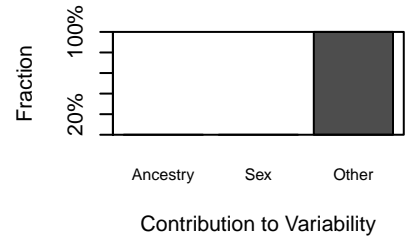



# Lindane 72

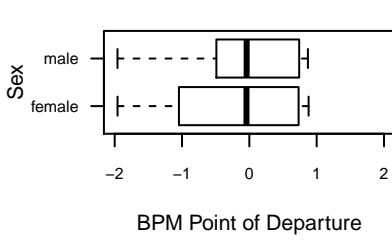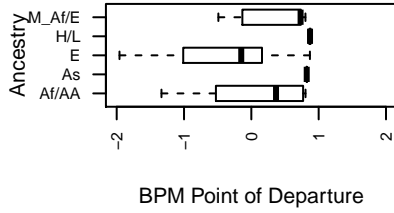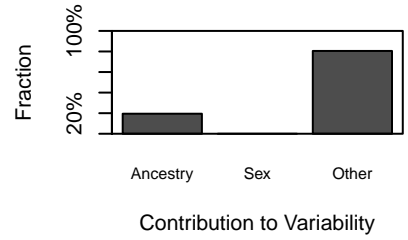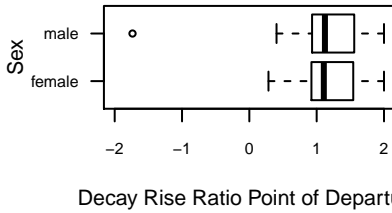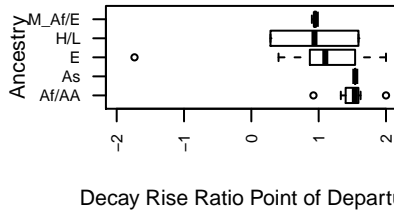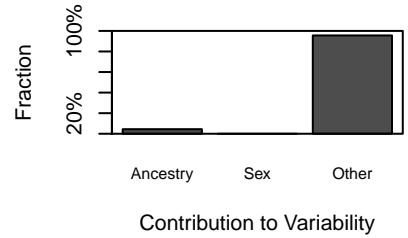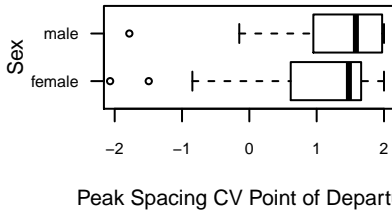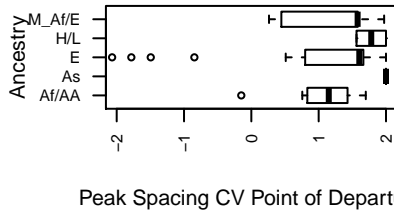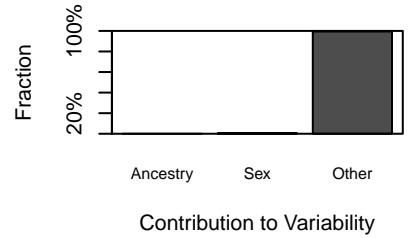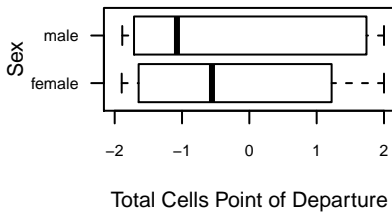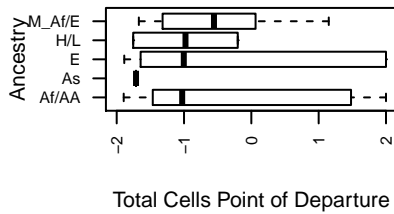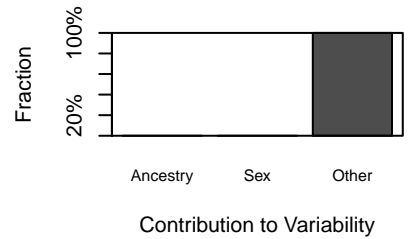

# Phenanthrene 73

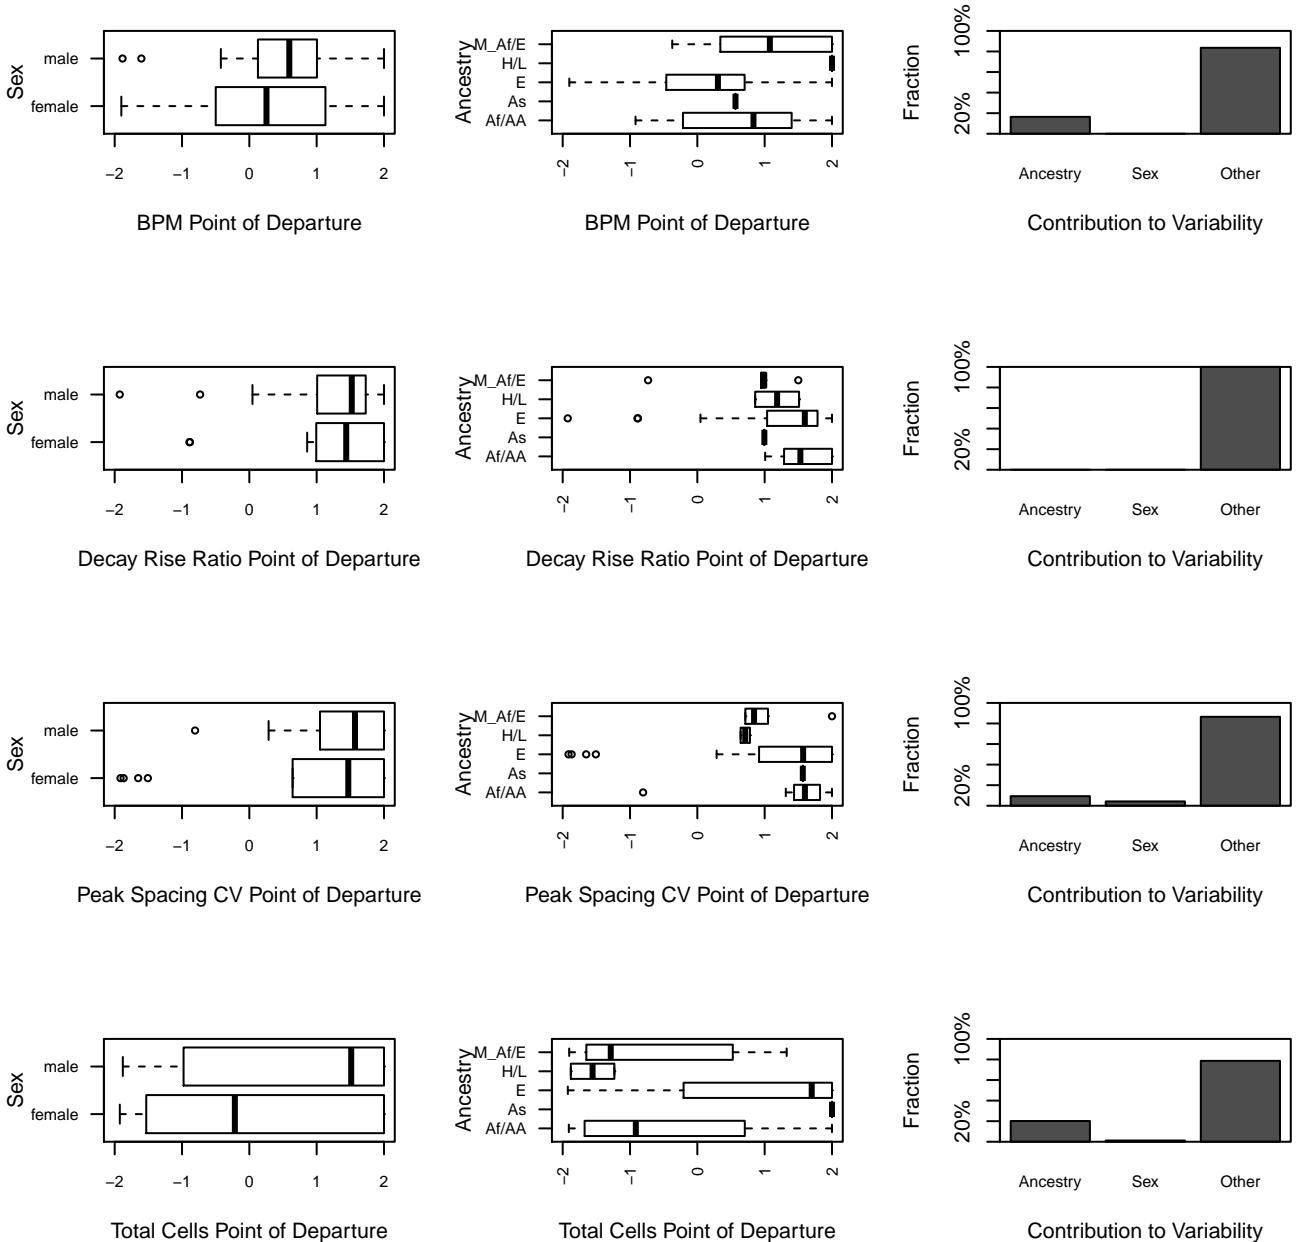

# Aldicarb 74

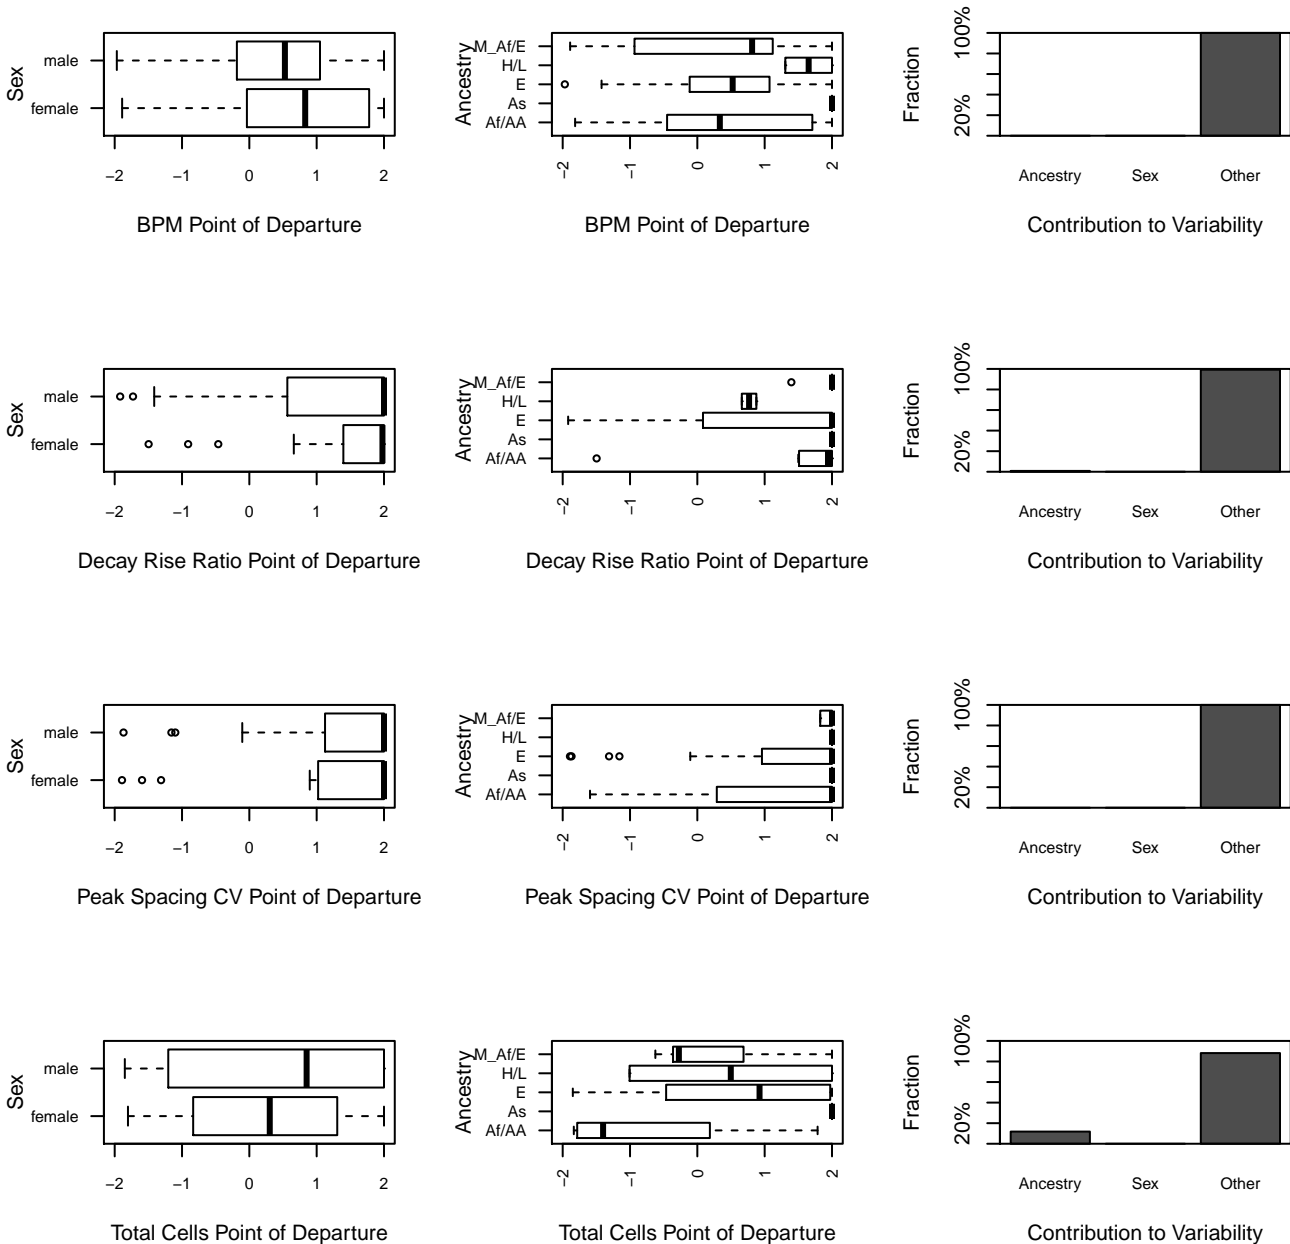

# Permethrin 75

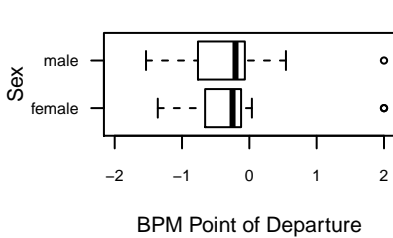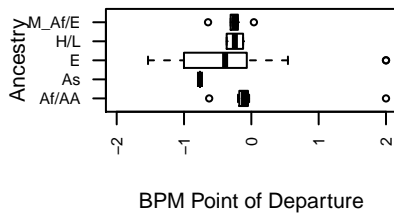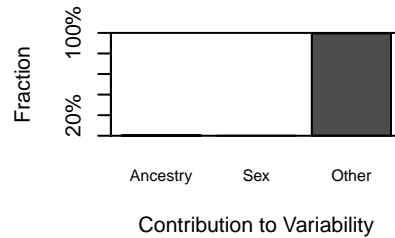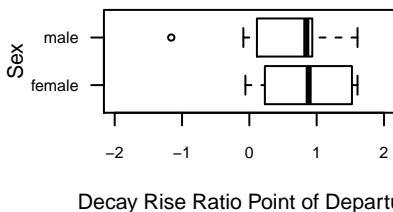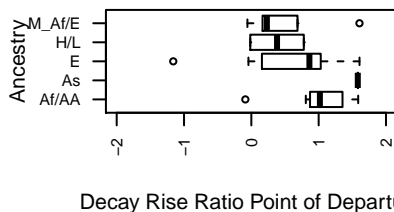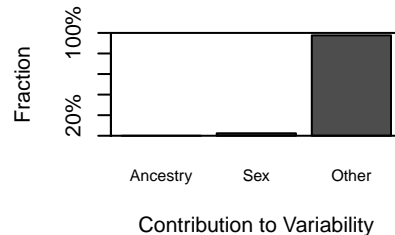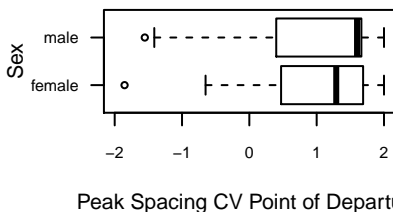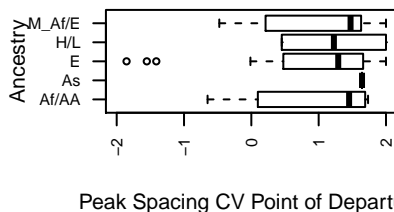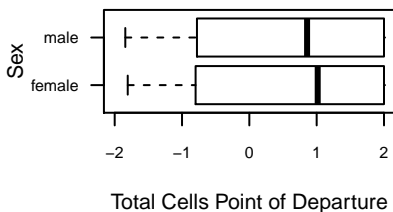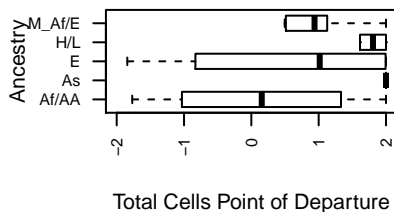

# Dazomet 76

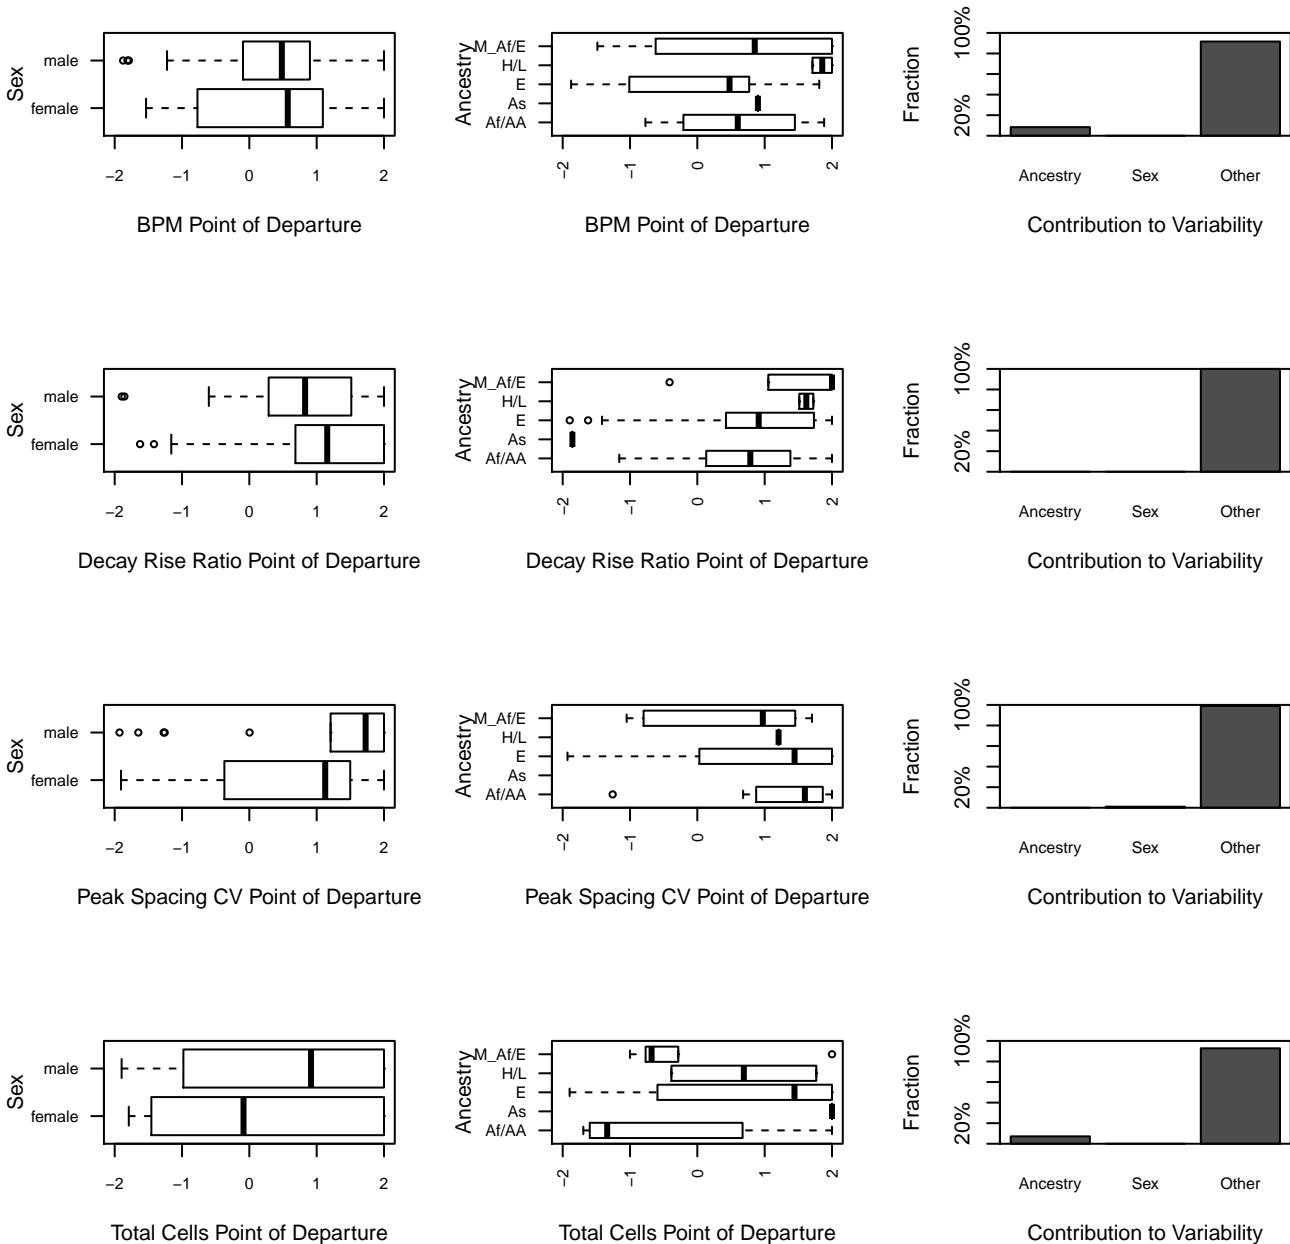

# Rotenone 77

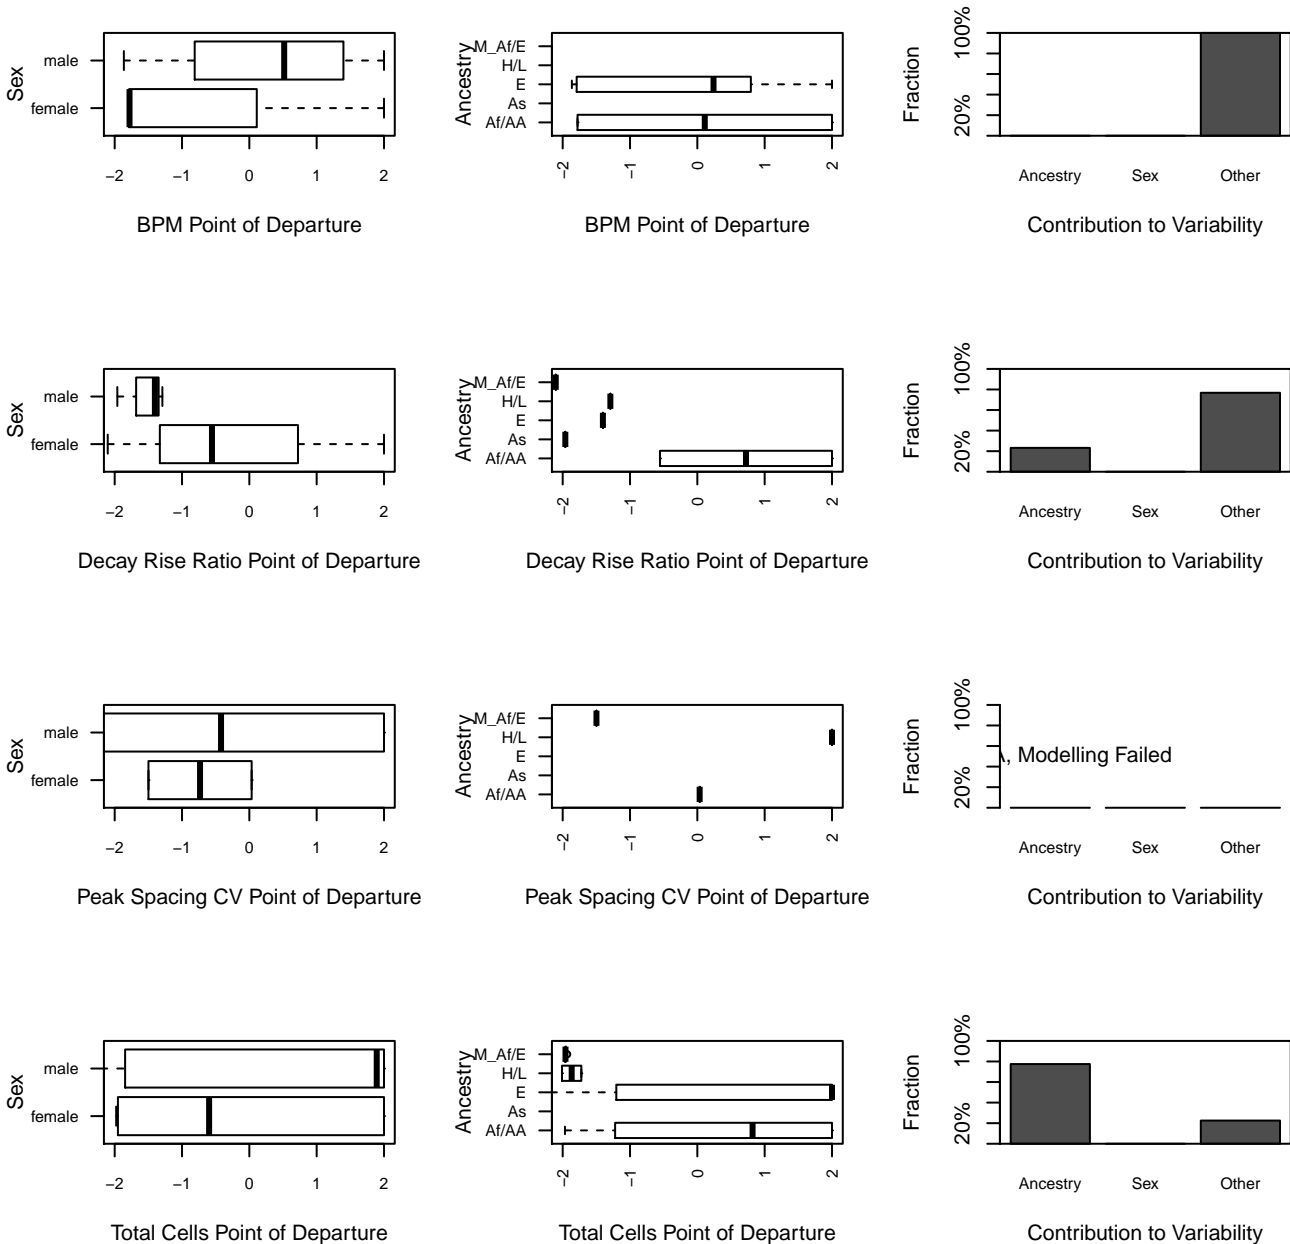

# Manganese(2)acetate 78

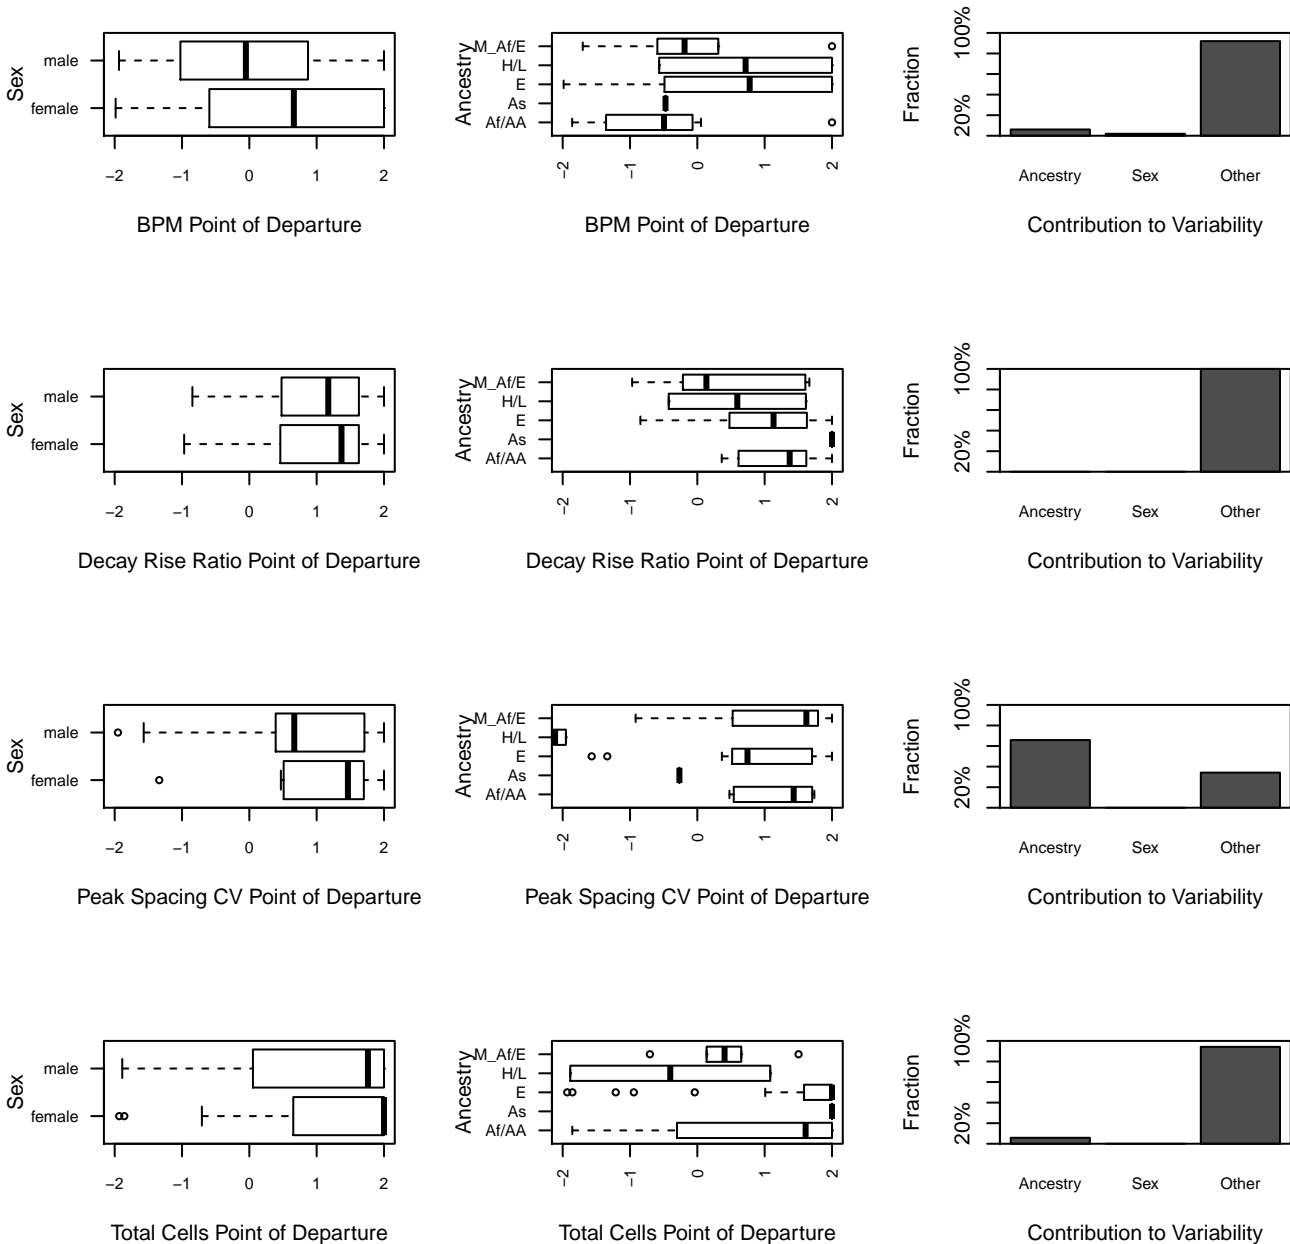

# Captan 79

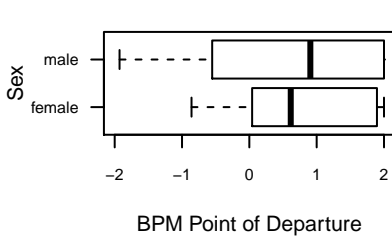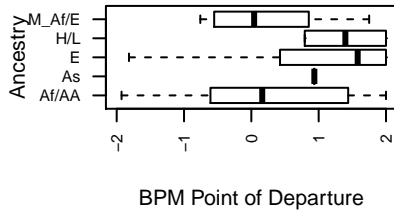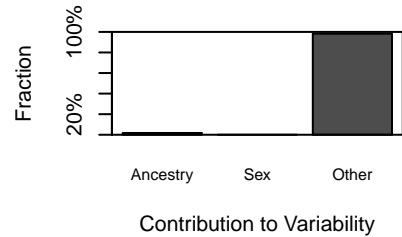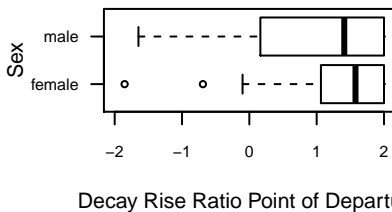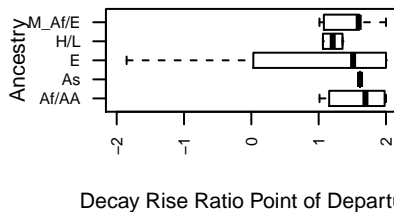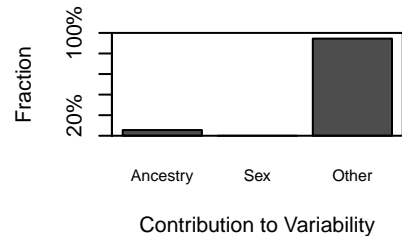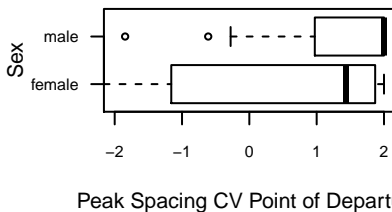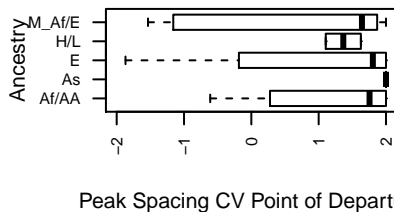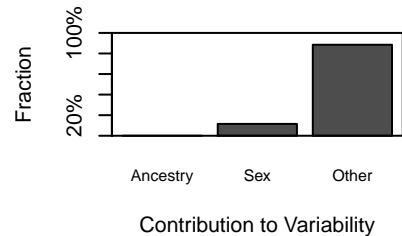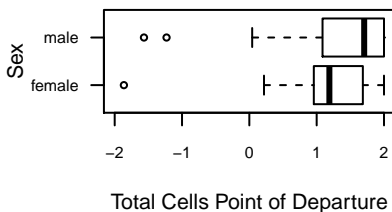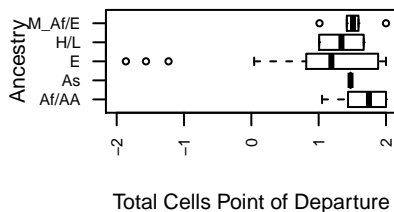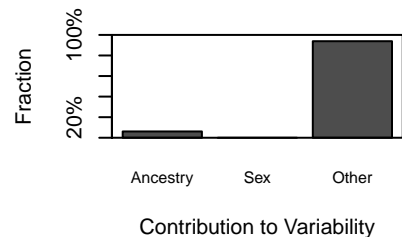



# 5-Fluorouracil 80

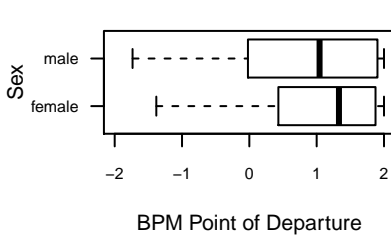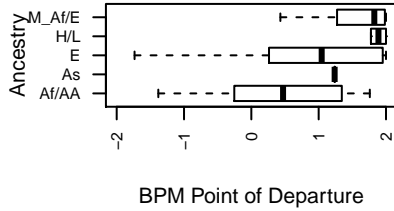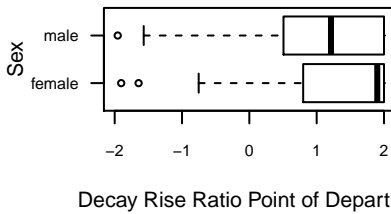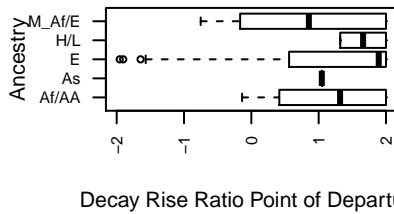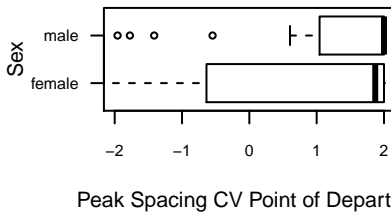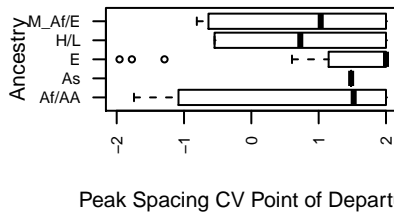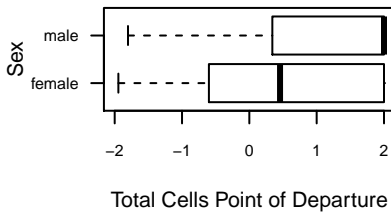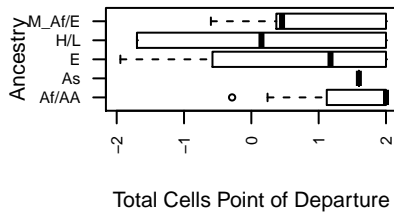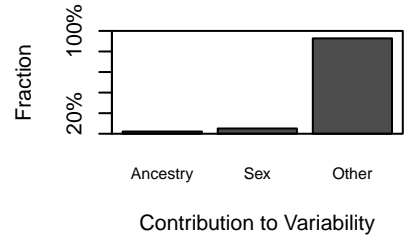

# Hexachlorophene 81

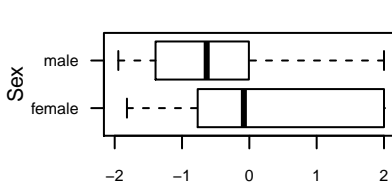

BPM Point of Departure

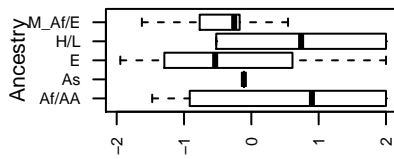

BPM Point of Departure

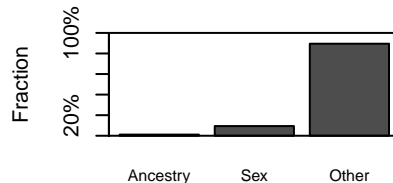

Contribution to Variability

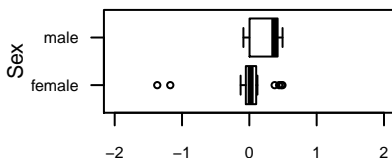

Decay Rise Ratio Point of Departure

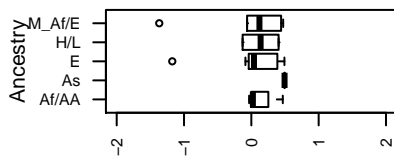

Decay Rise Ratio Point of Departure

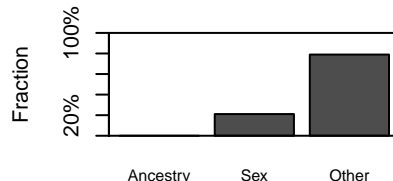

Contribution to Variability

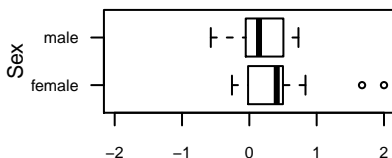

Peak Spacing CV Point of Departure

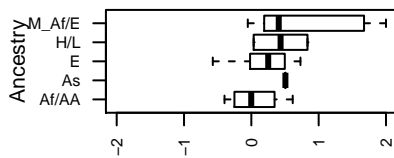

Peak Spacing CV Point of Departure

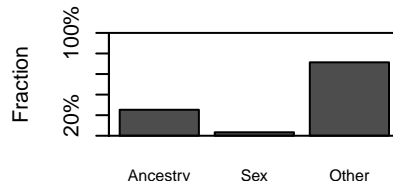

Contribution to Variability

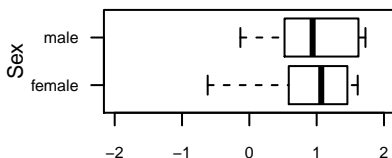

Total Cells Point of Departure

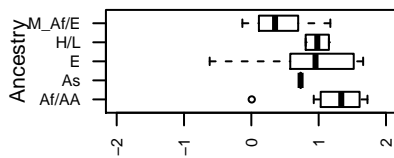

Total Cells Point of Departure

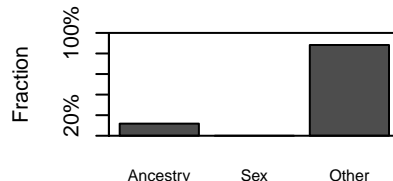

Contribution to Variability

# 3,3'-Iminobispropanenitrile 82

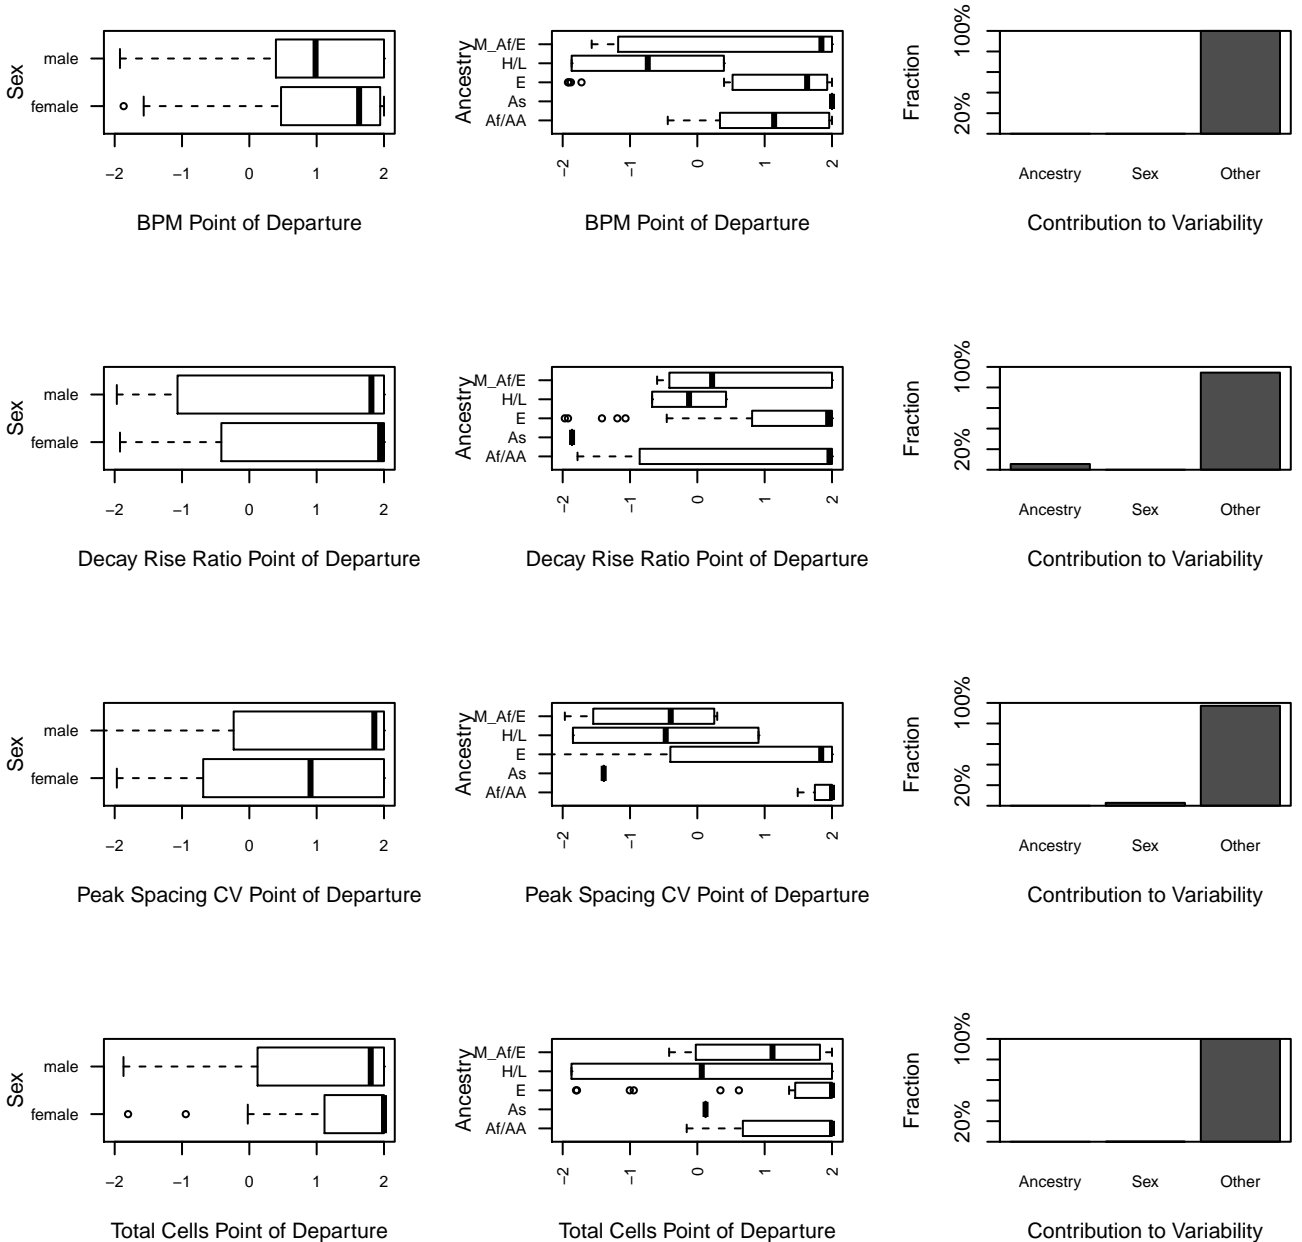

## 2-Phenylphenol 83

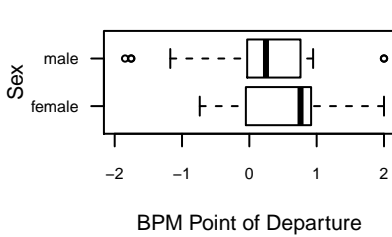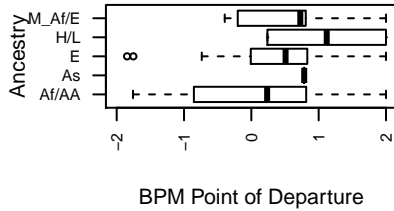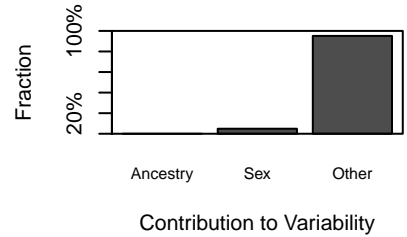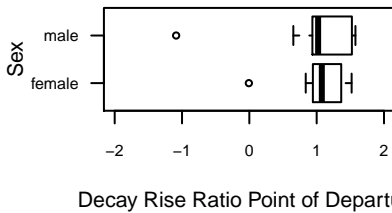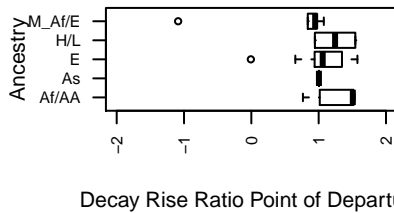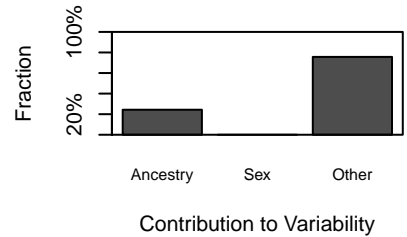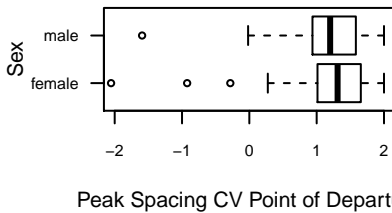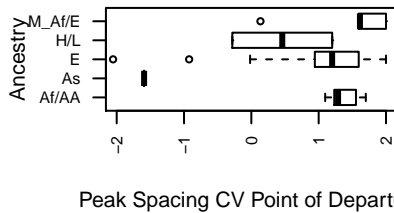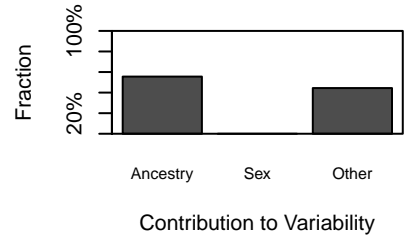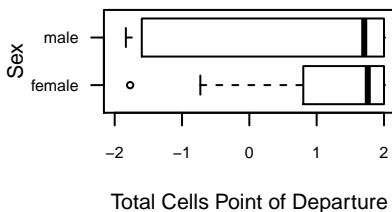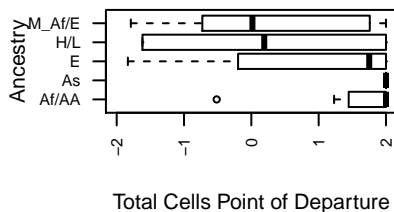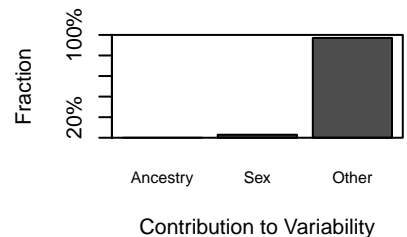

# Myclobutanil 84

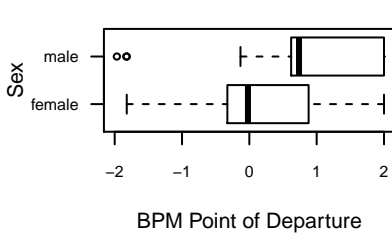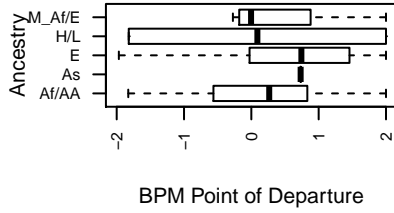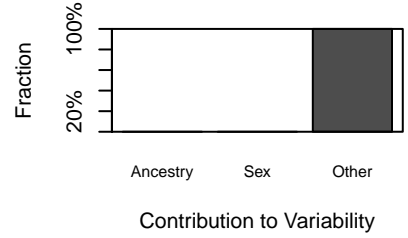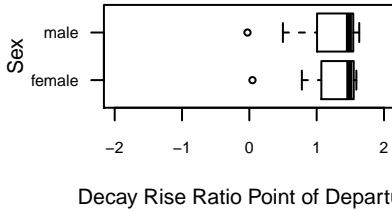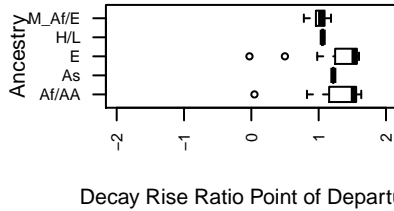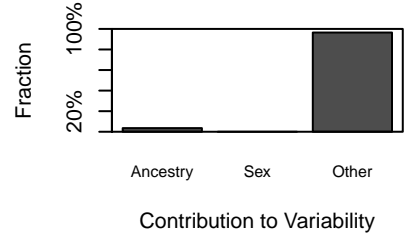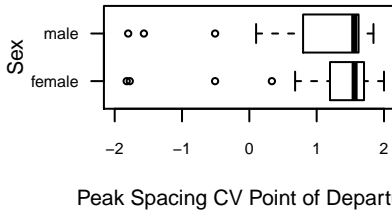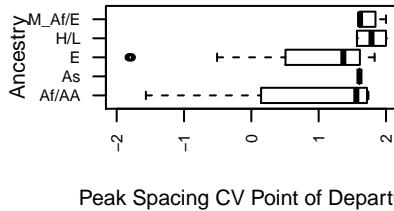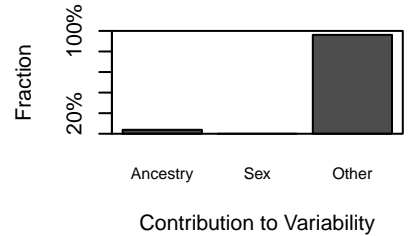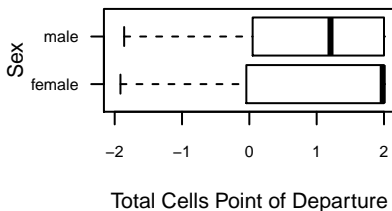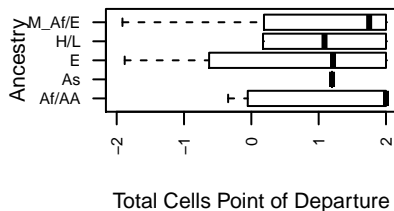

# Acetochlor 85

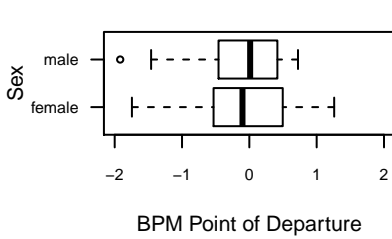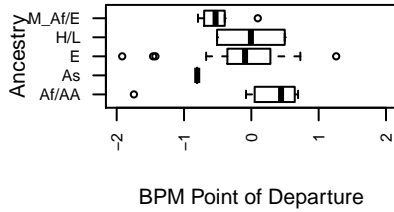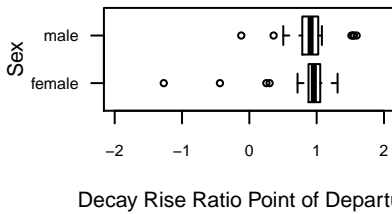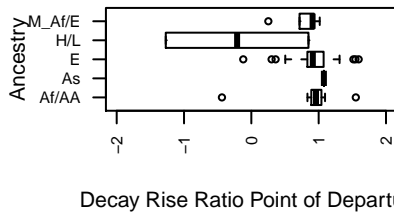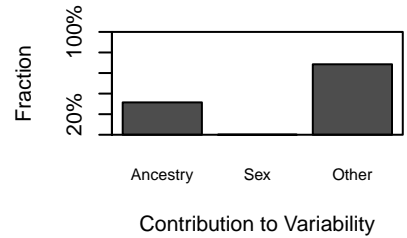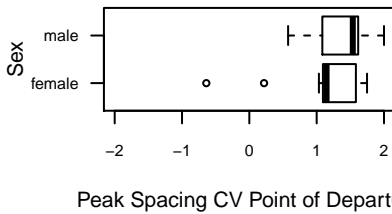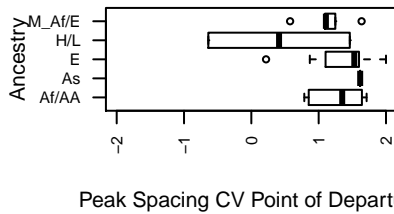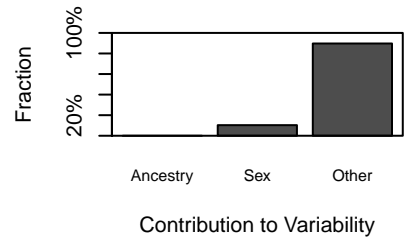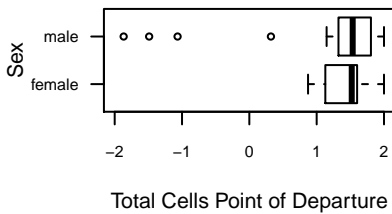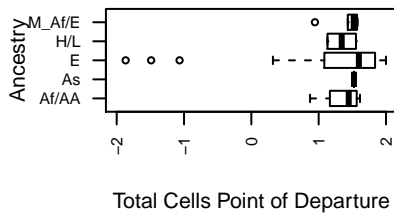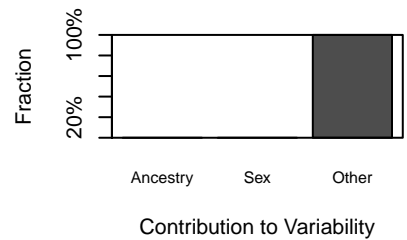

# Hexachloro-1,3-butadiene 86

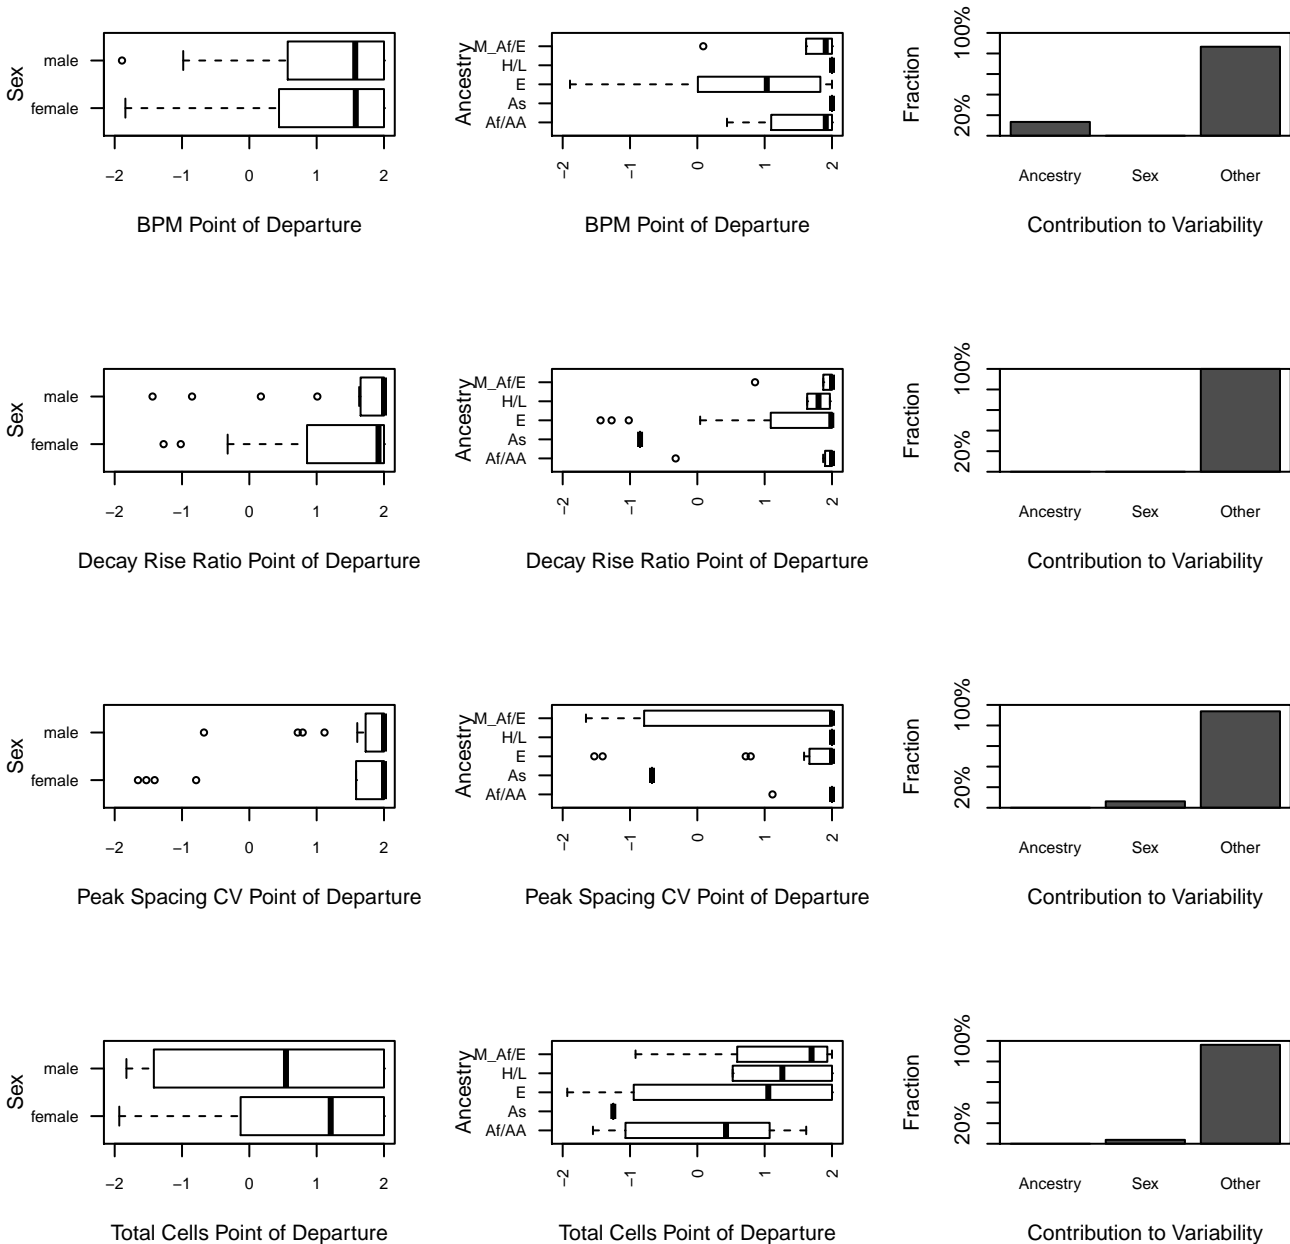

# Octhlinone 87

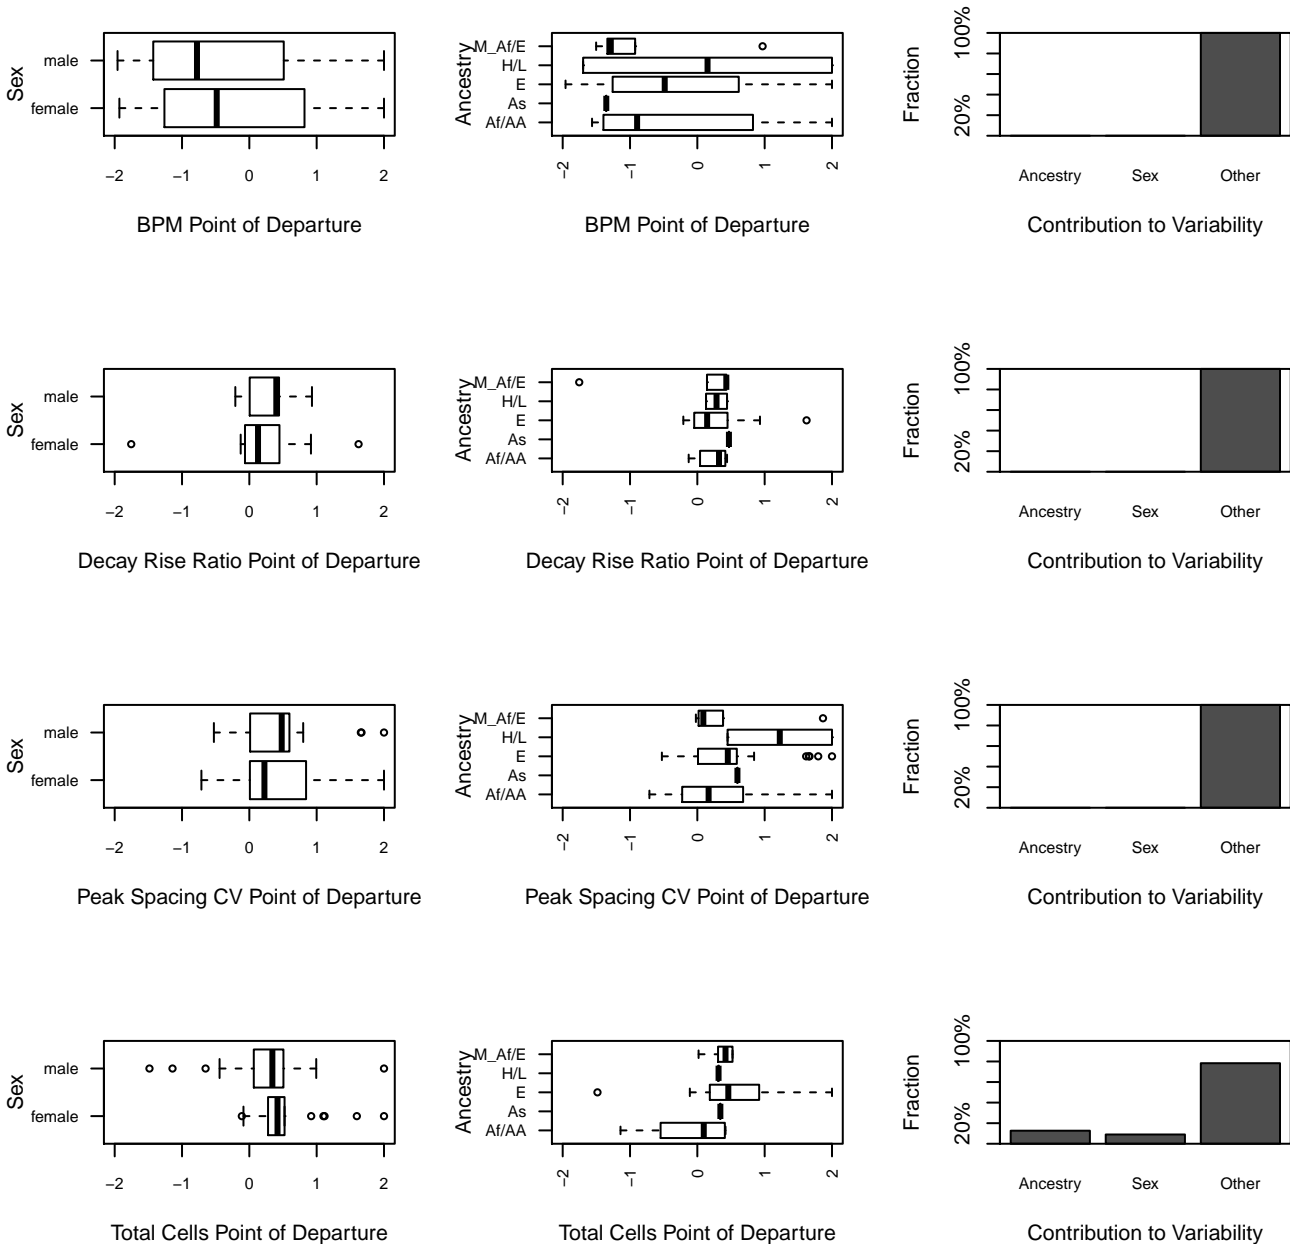



# 6-Thioguanine 88

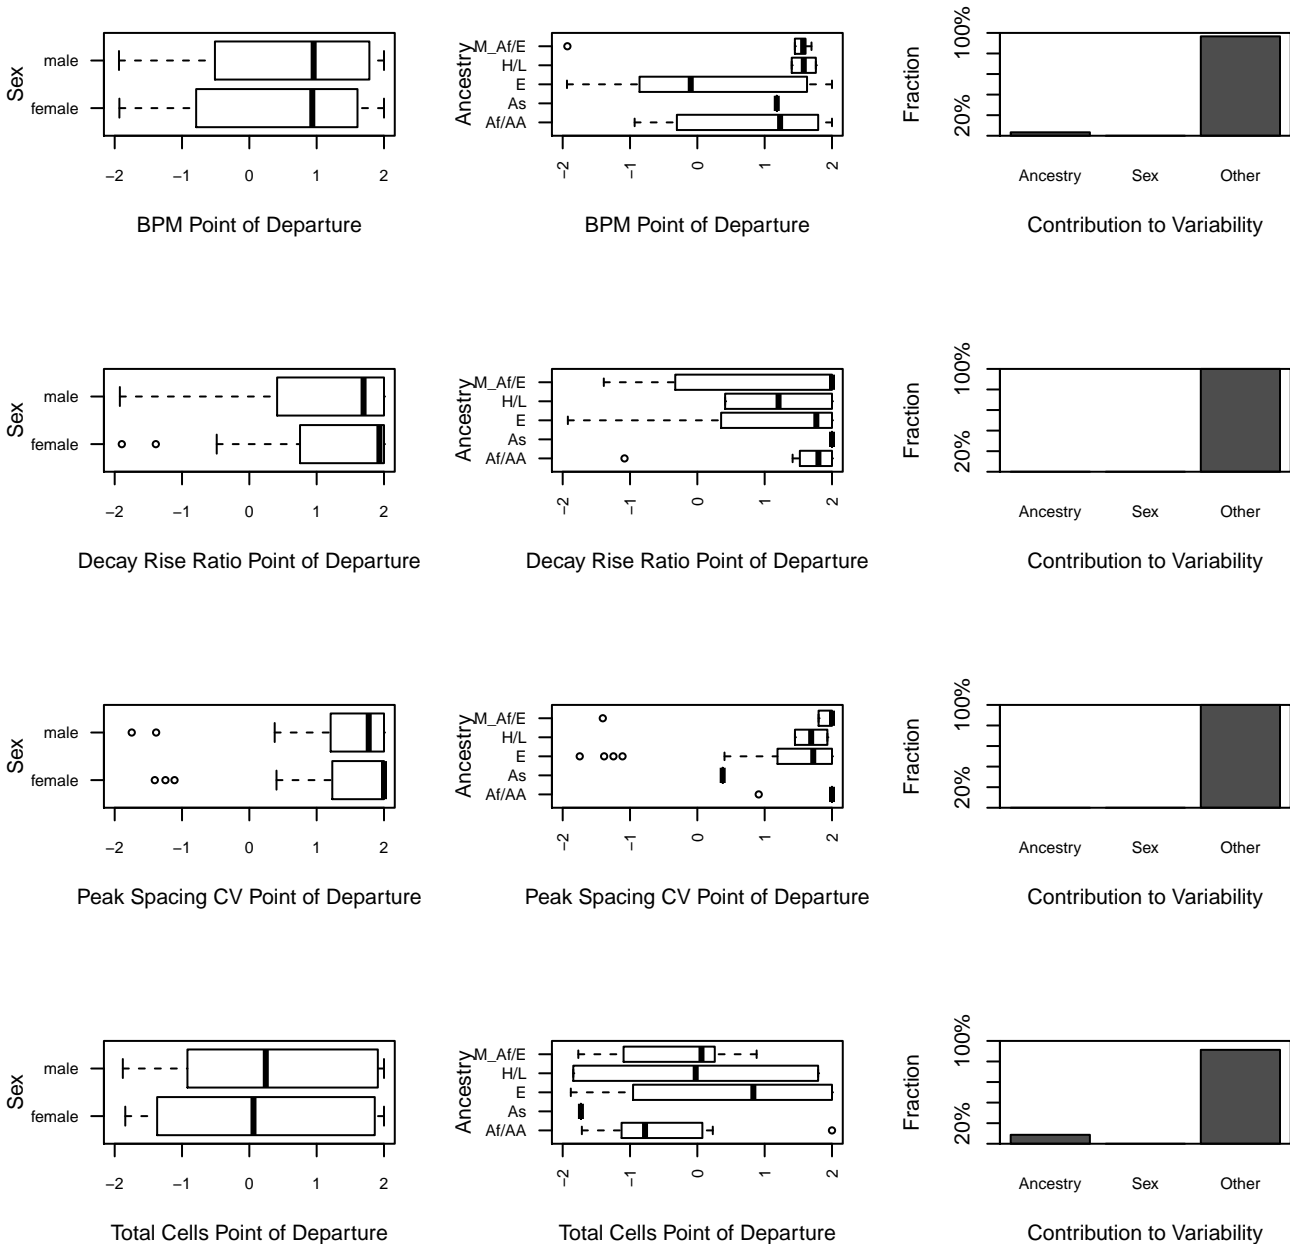

# tert-Butylphenyl\_diphenyl\_phosphate 89

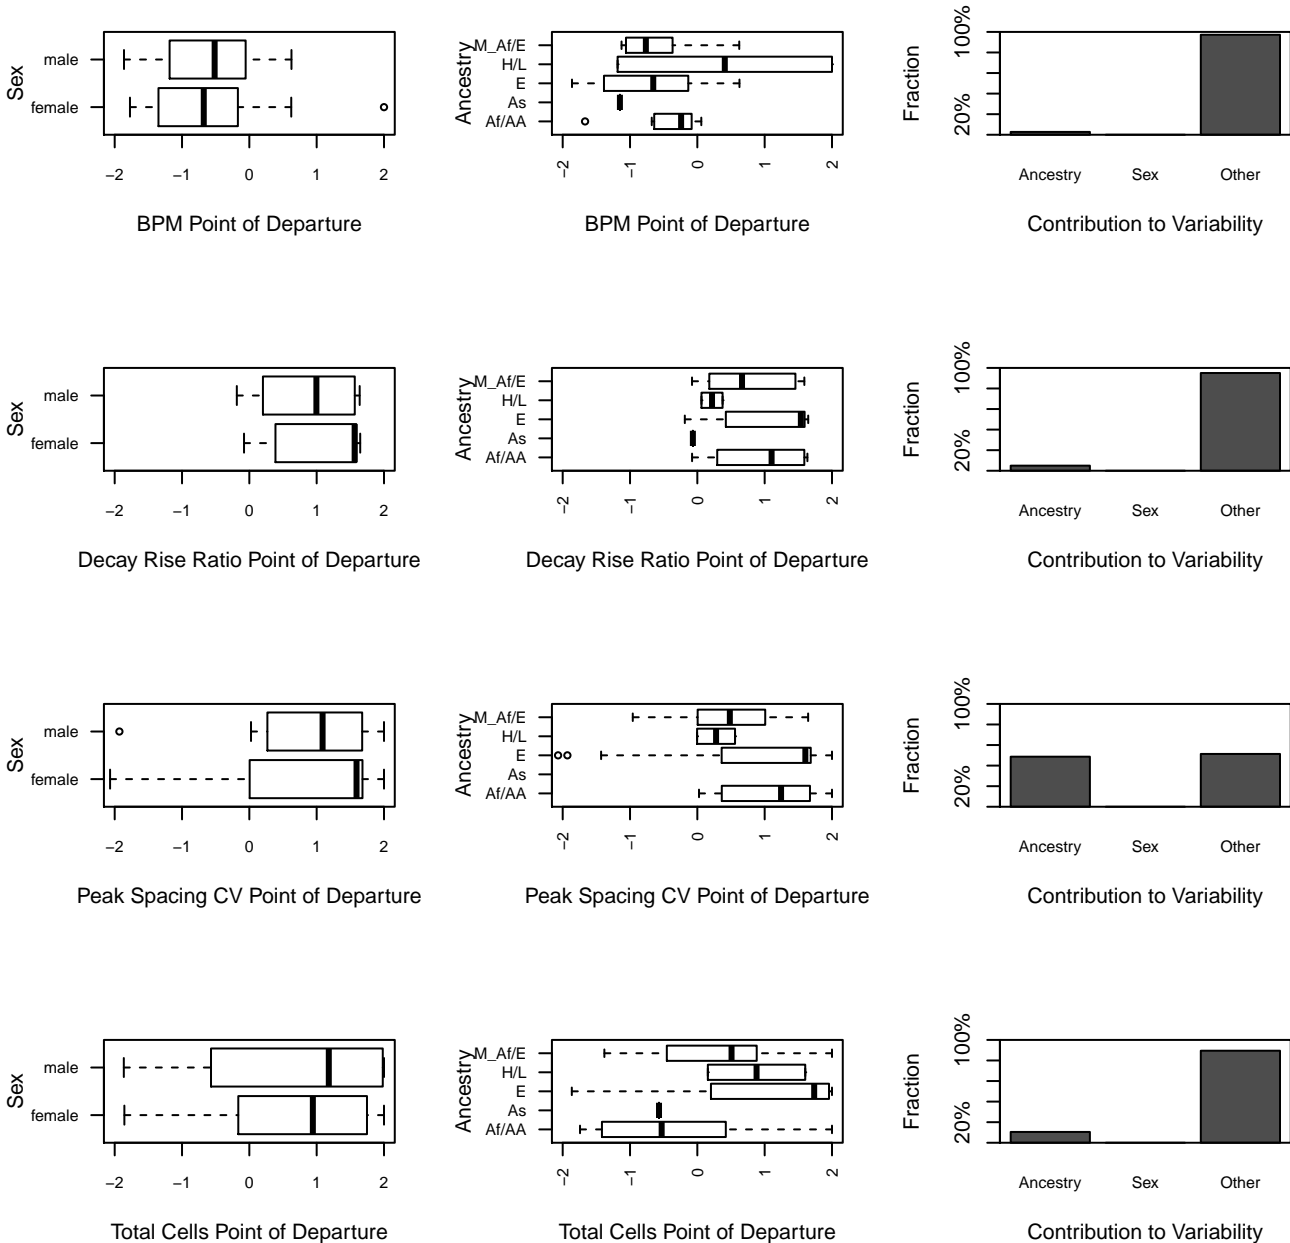

# Thalidomide 90

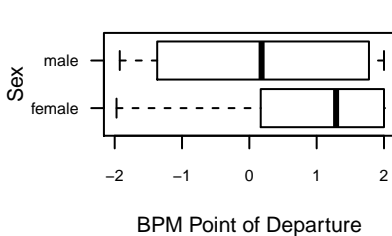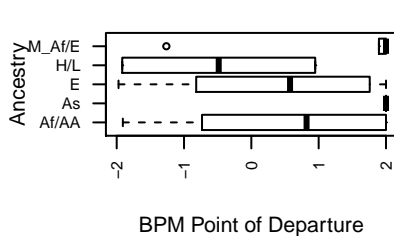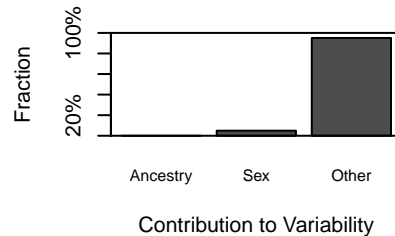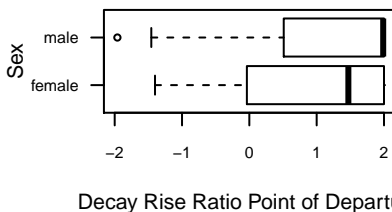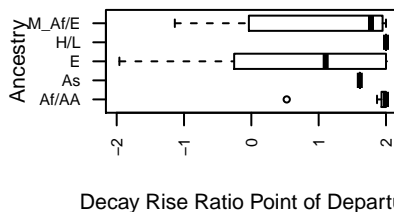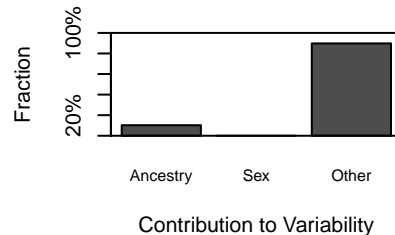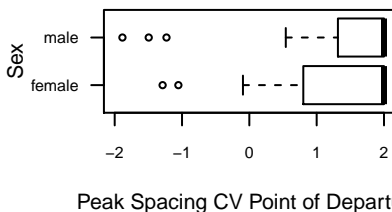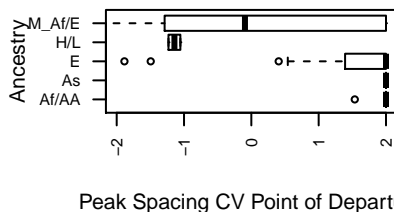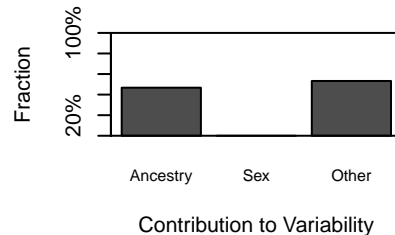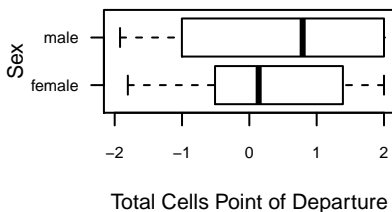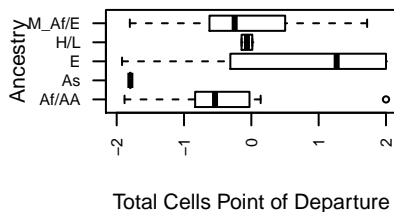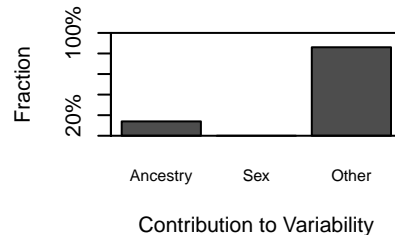

# Sucrose 91

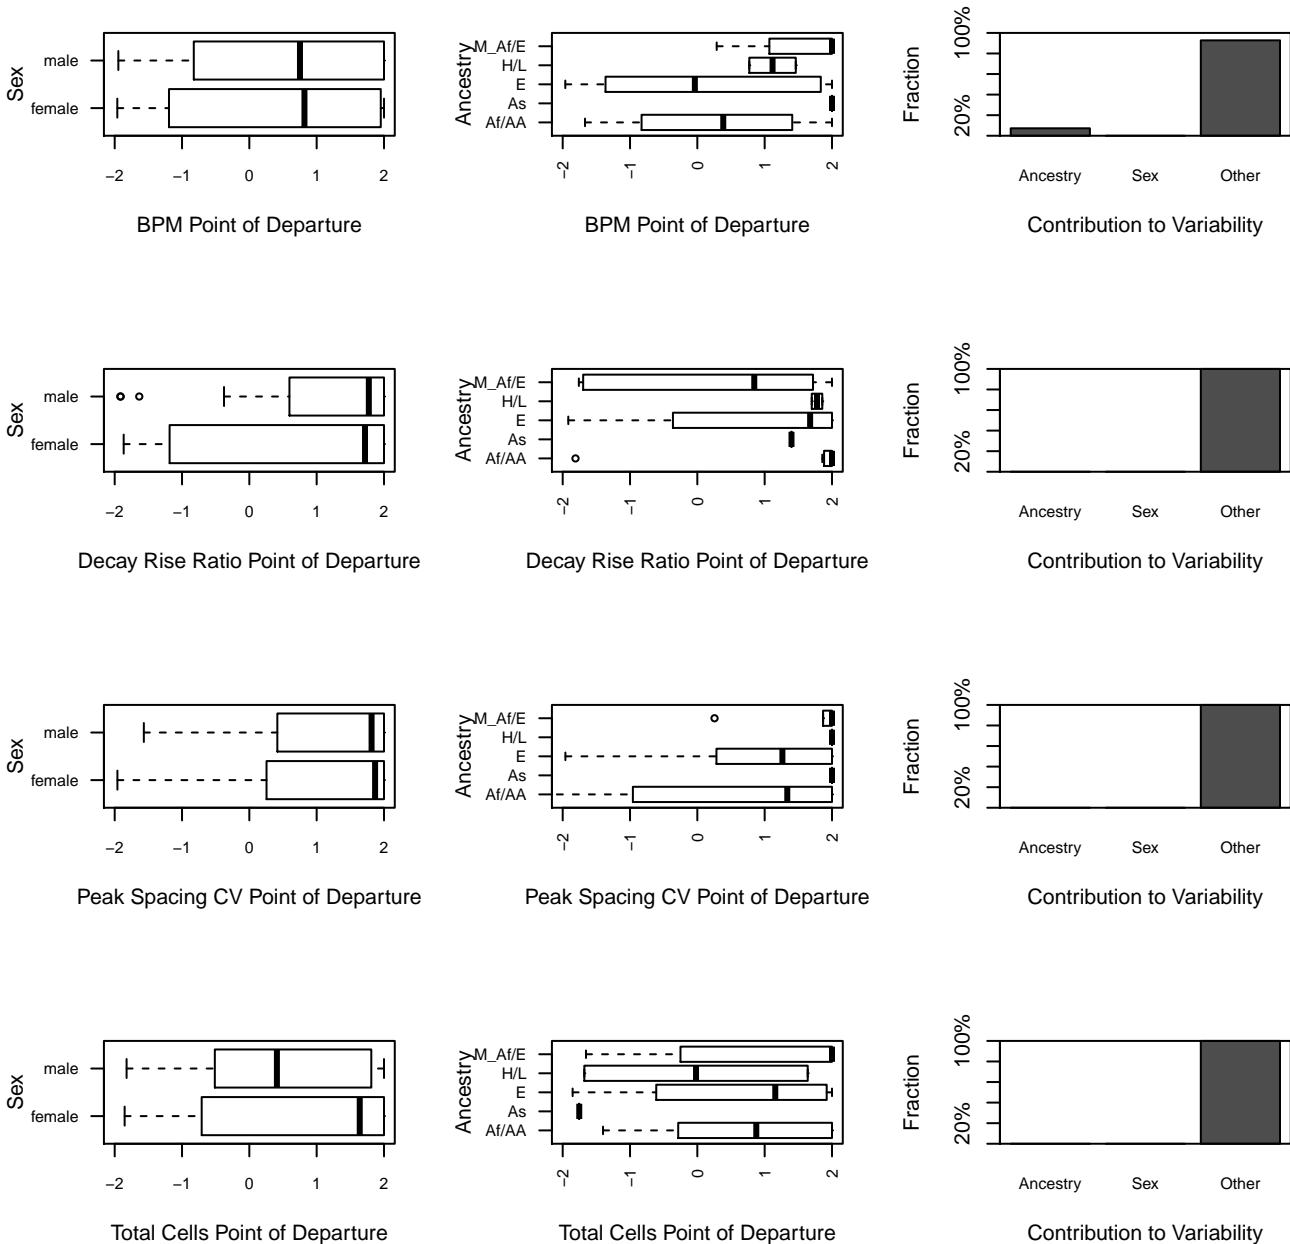

# 3,3',5,5'-Tetrabromobisphenol\_A 92

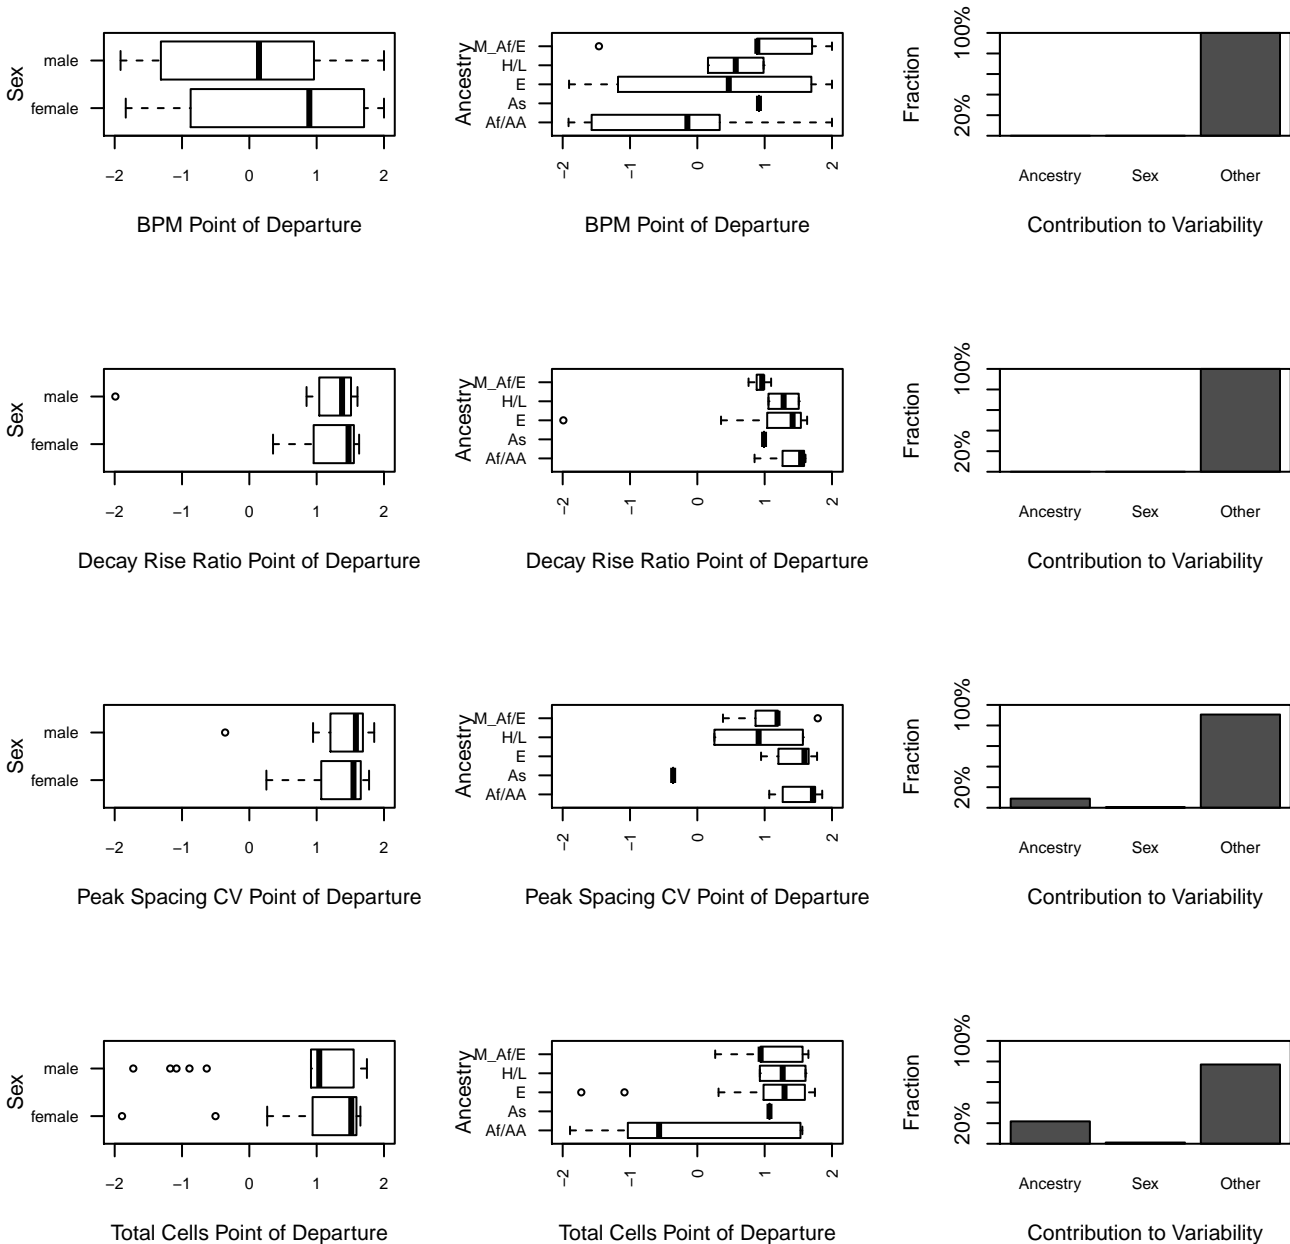

# Triphenyl\_phosphate 93

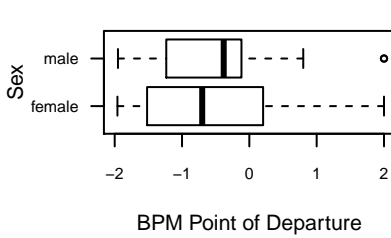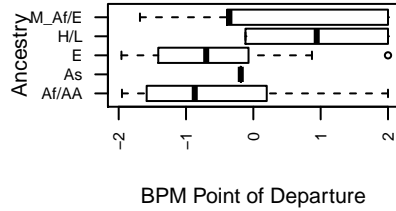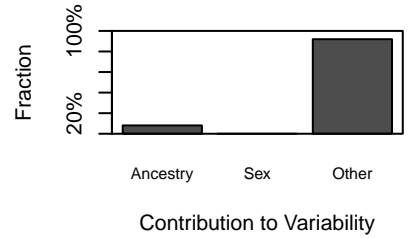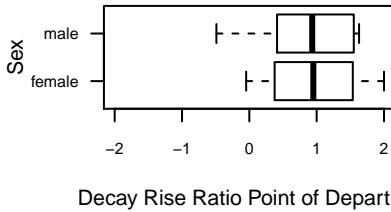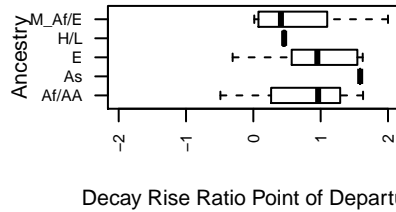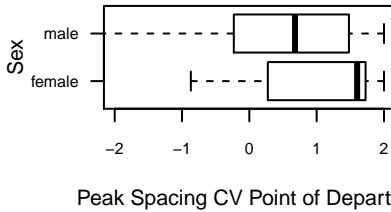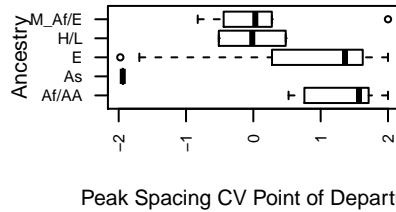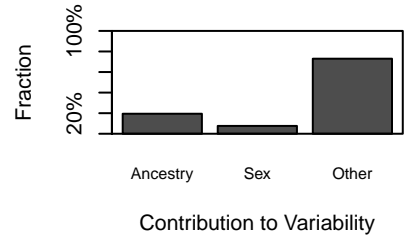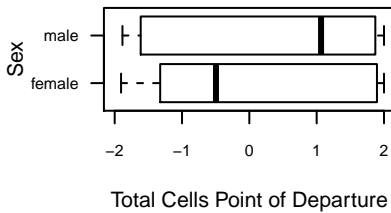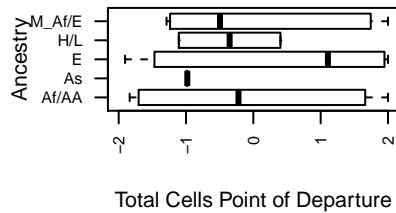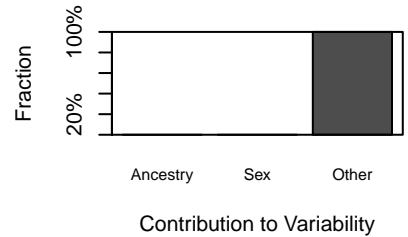

# Triamterene 94

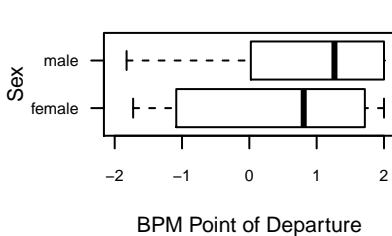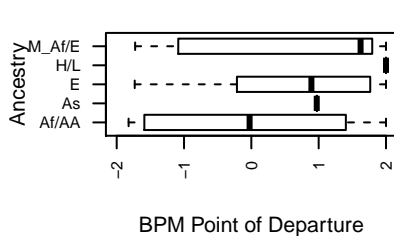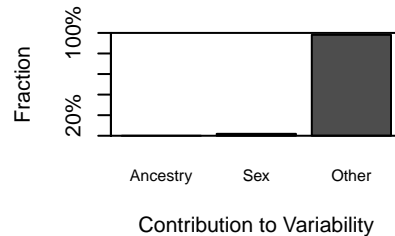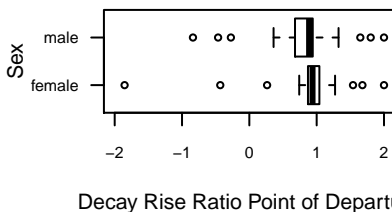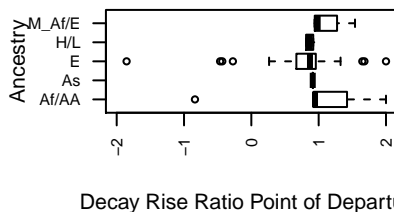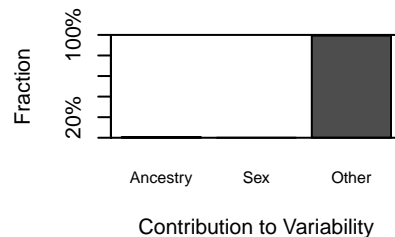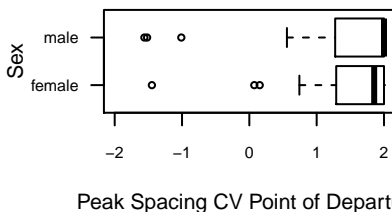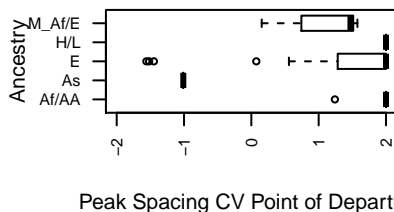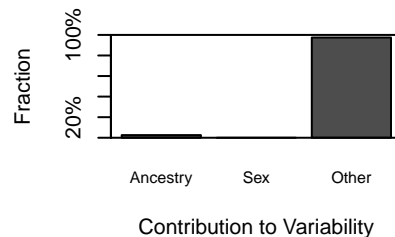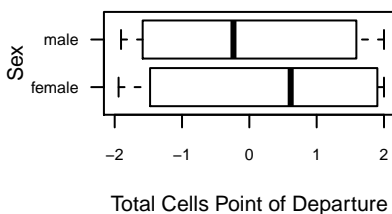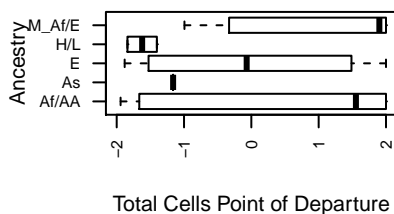

# (Methylcyclopentadienyl)tricarbonylmanganese 95

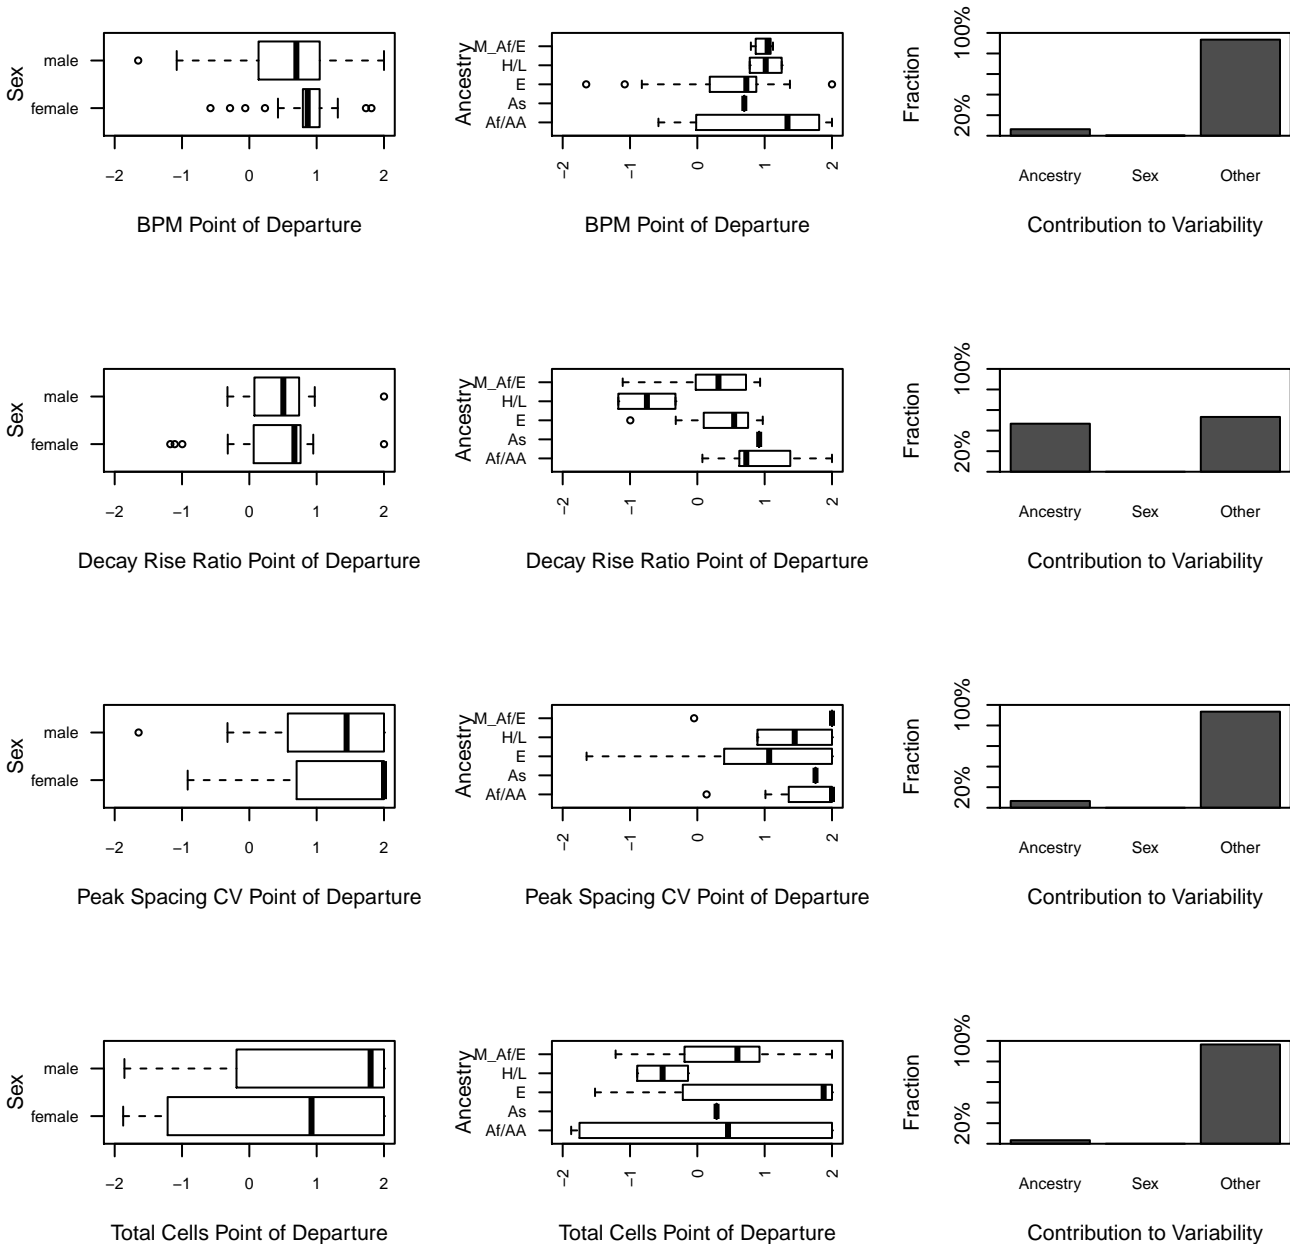



# Benzoic\_acid 96

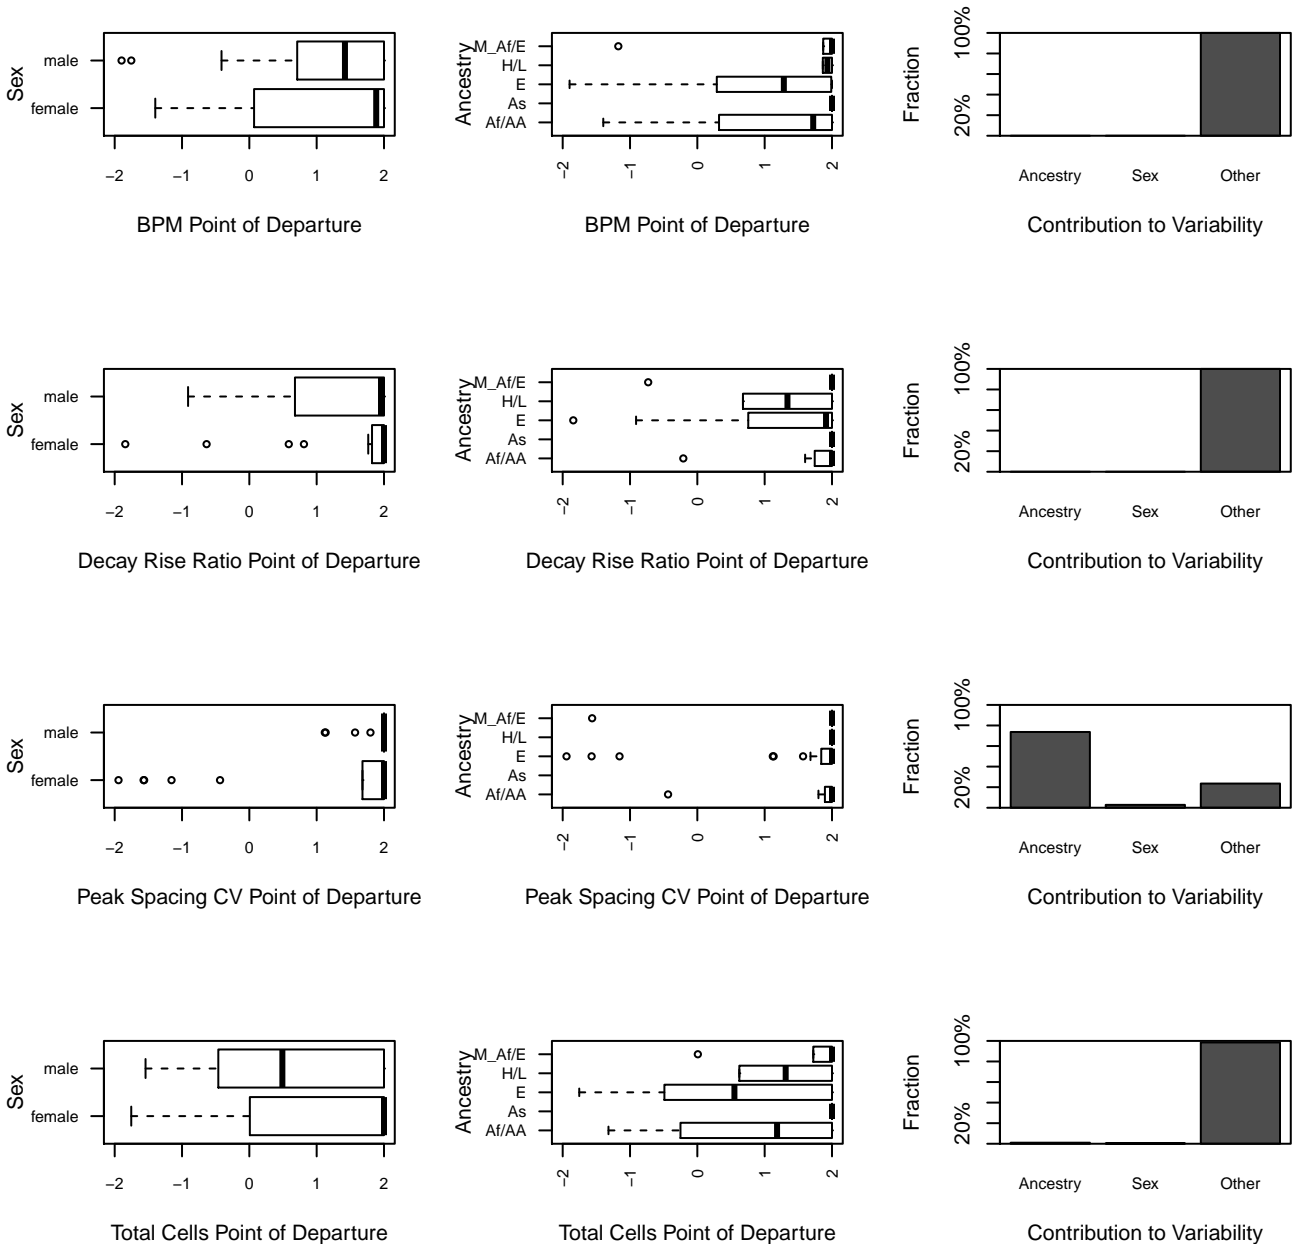

# Disulfiram 97

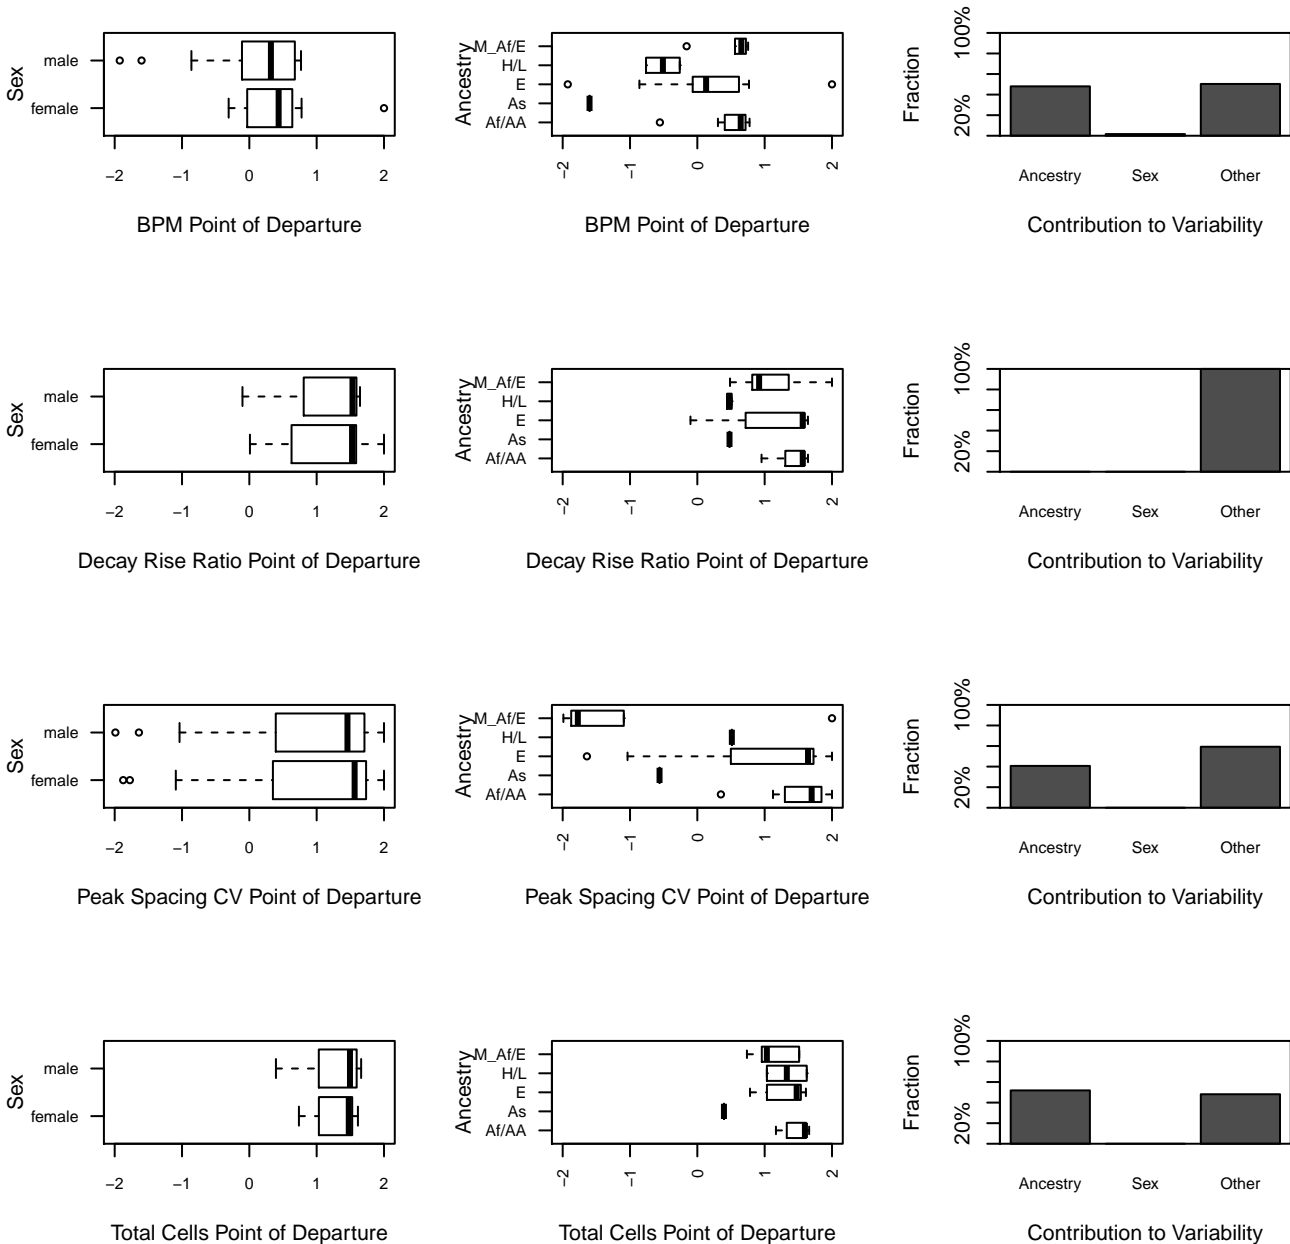

# Anthracene 98

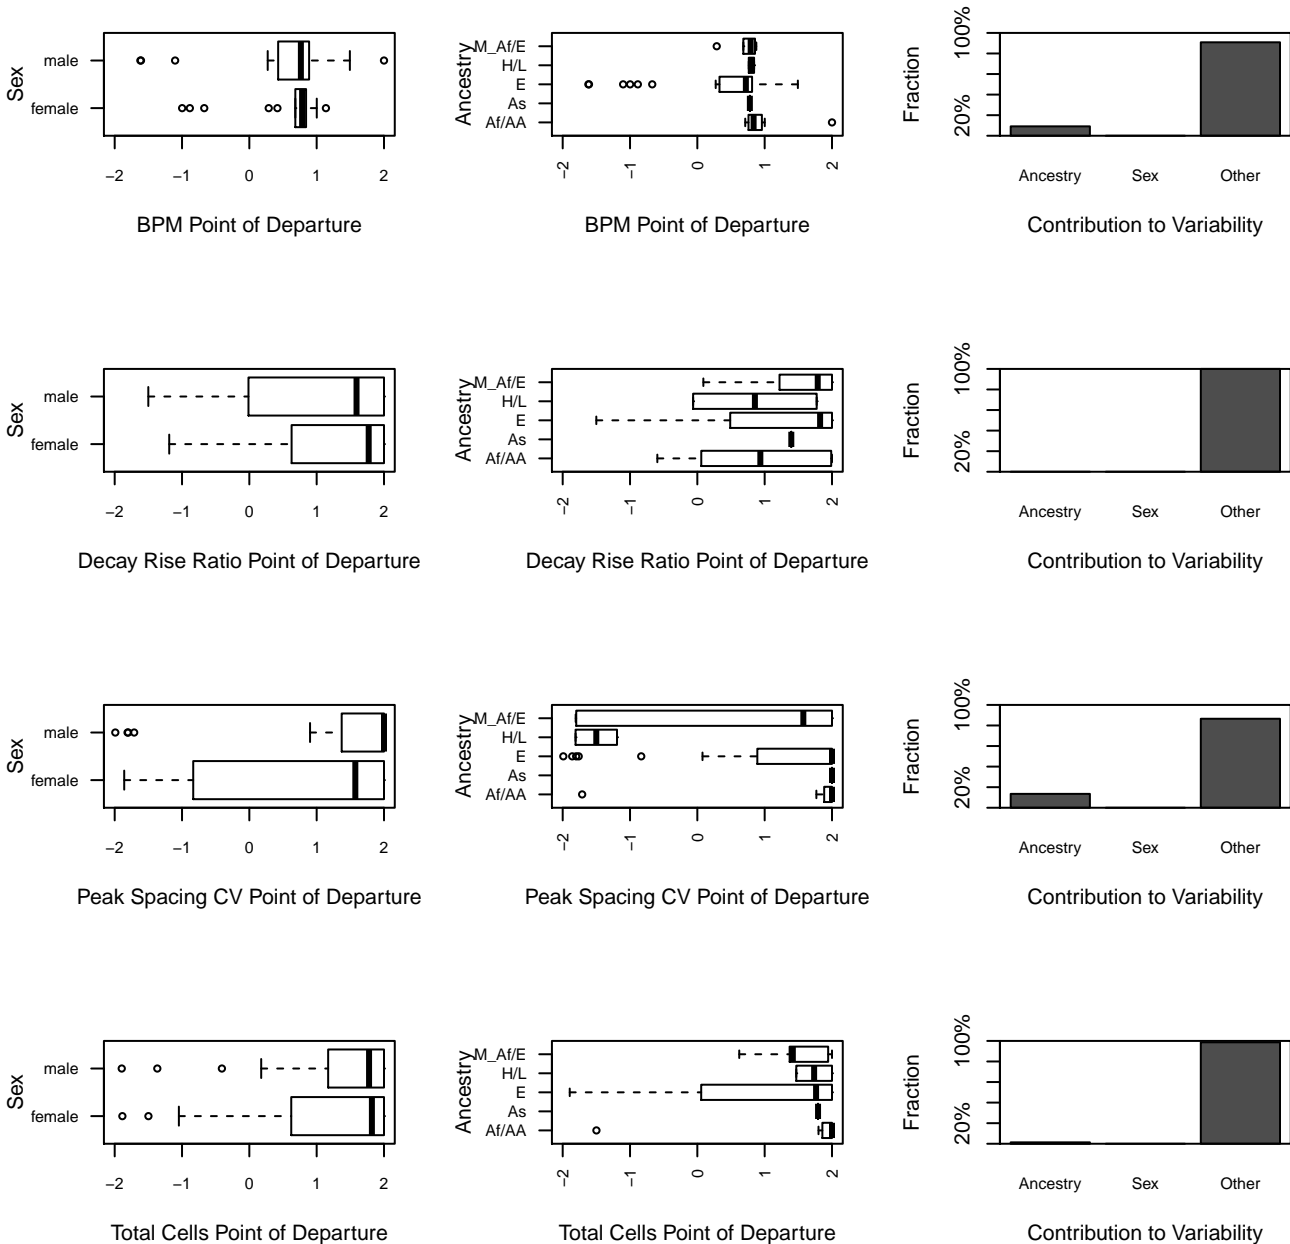

# Acetaminophen 99

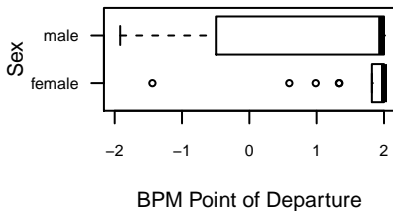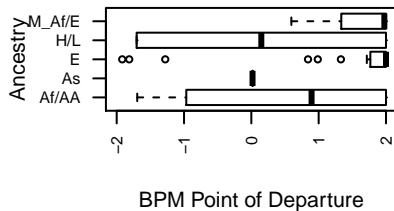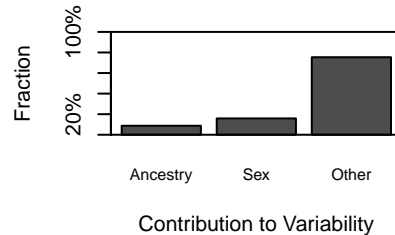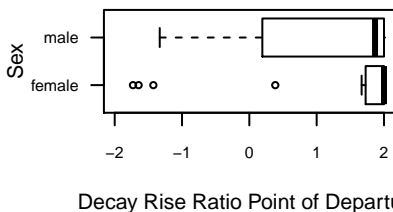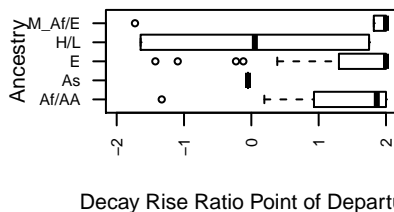

Decay Rise Ratio Point of Departure

Decay Rise Ratio Point of Departure

Contribution to Variability

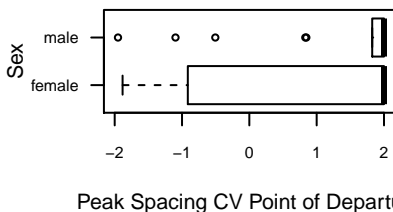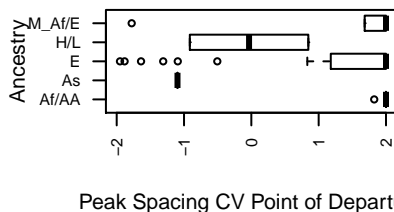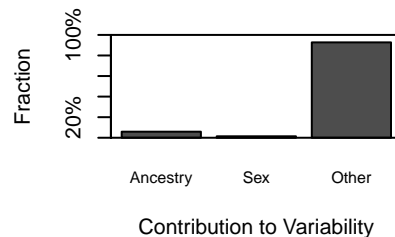

Peak Spacing CV Point of Departure

Peak Spacing CV Point of Departure

Contribution to Variability

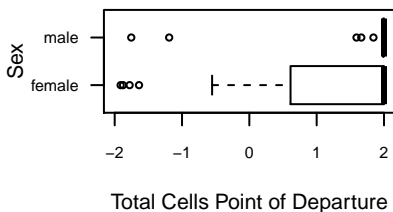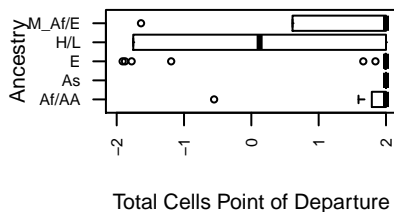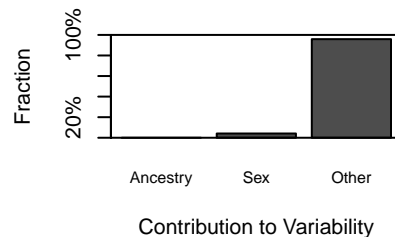

Total Cells Point of Departure

Total Cells Point of Departure

Contribution to Variability

# Aspirin 100

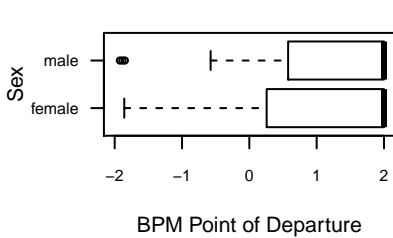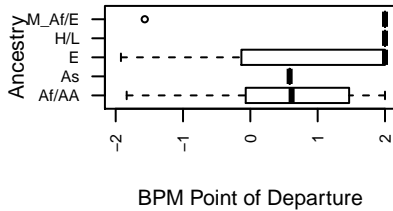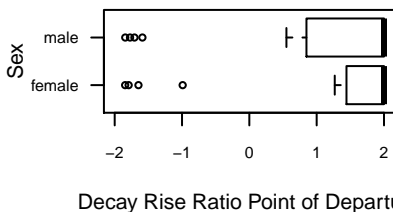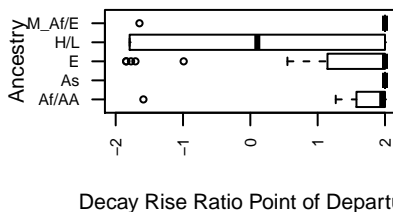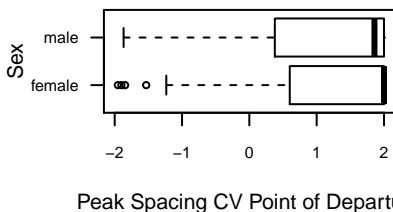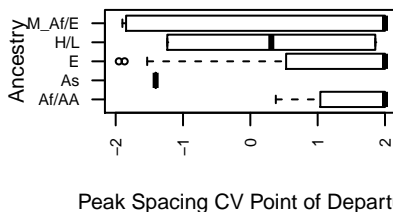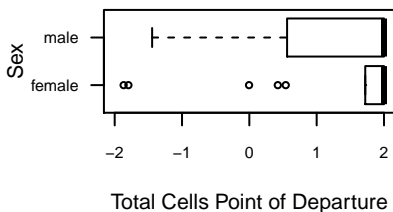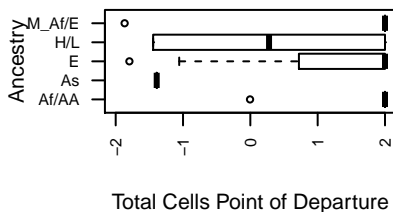

# Acrylamide 101

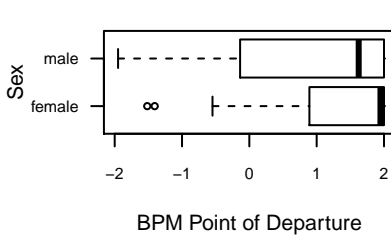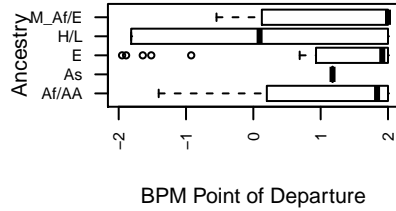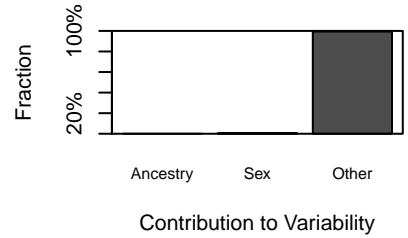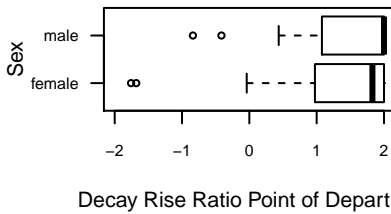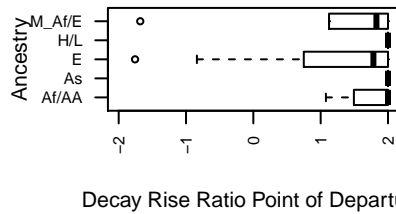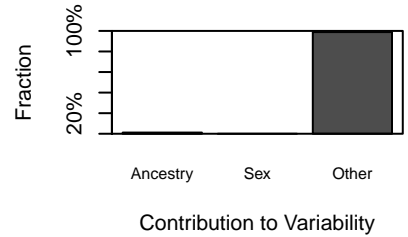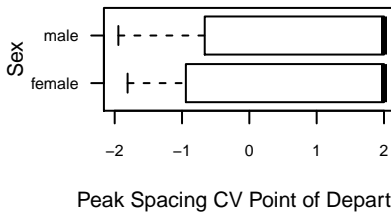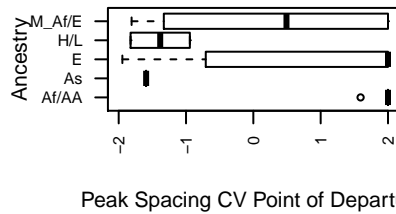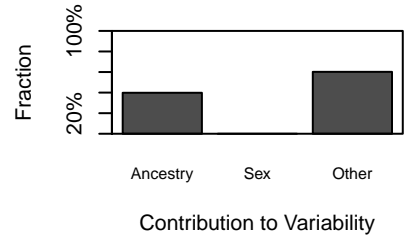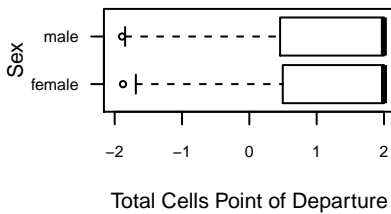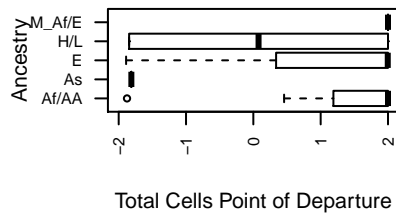

# Benz(a)anthracene 102

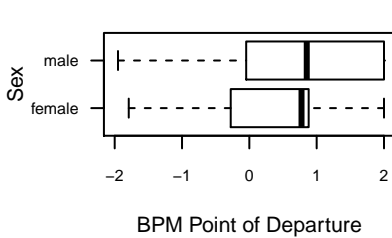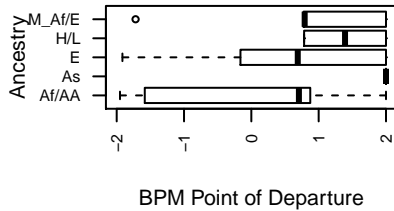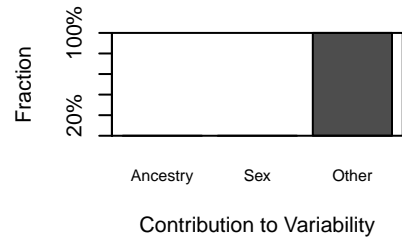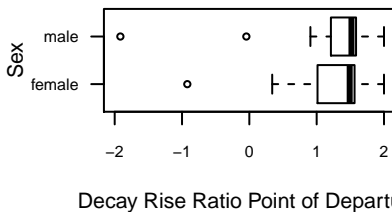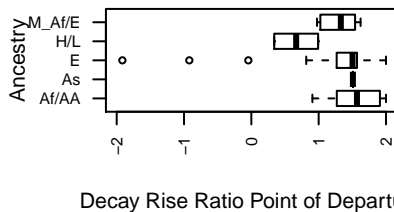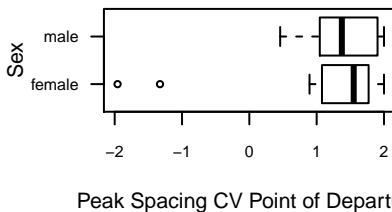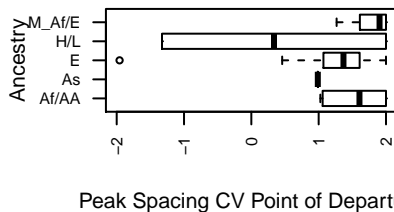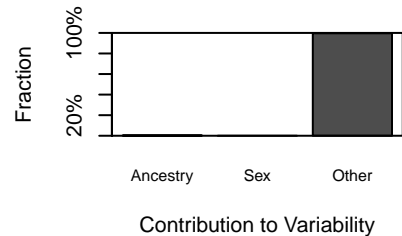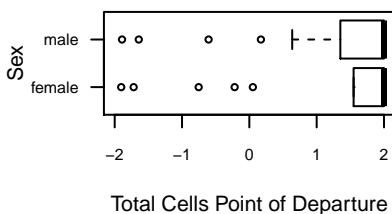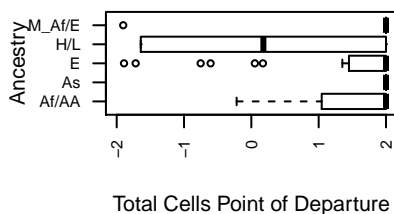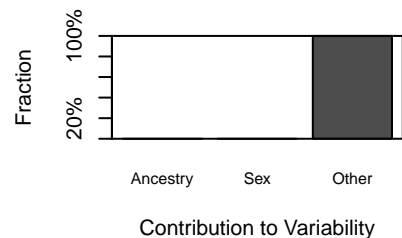

# Azobenzene 103

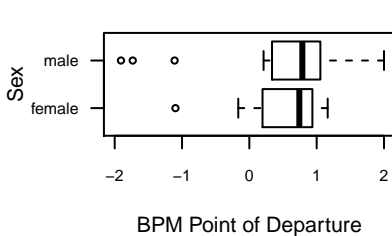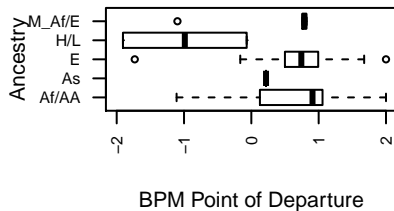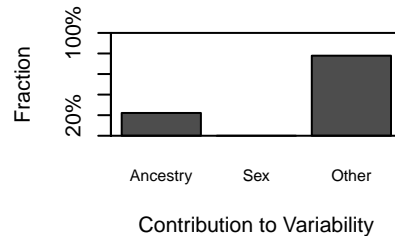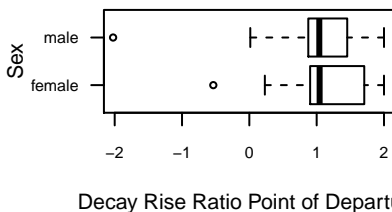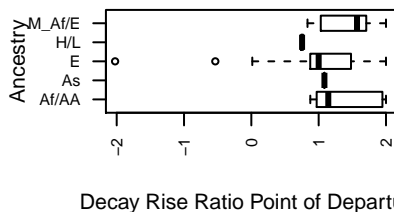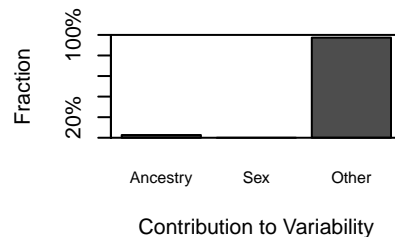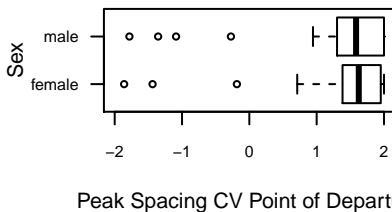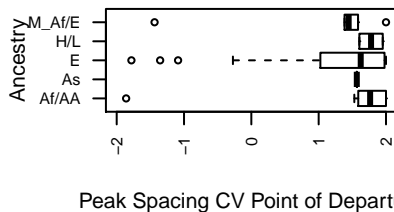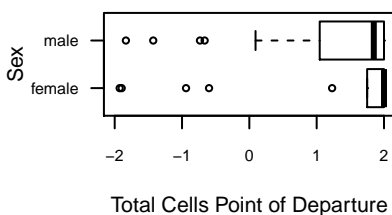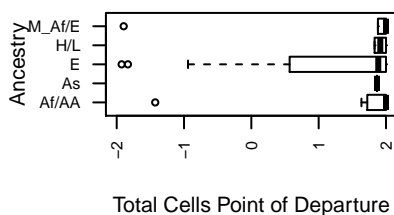



# Mifepristone2 104

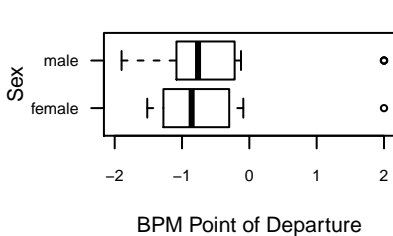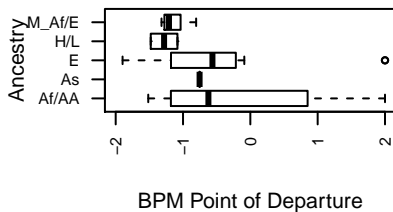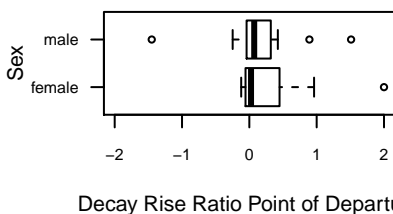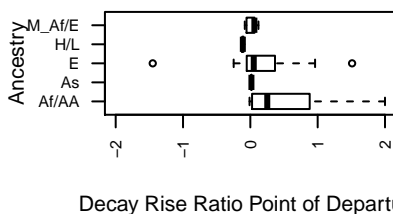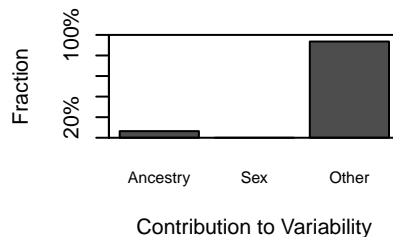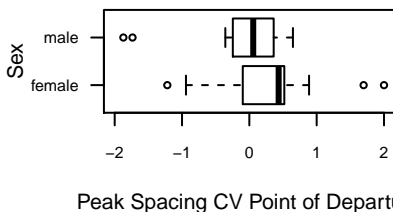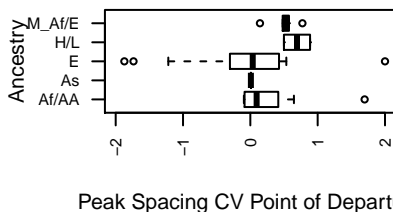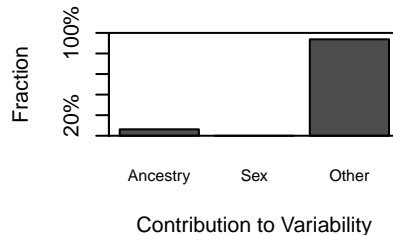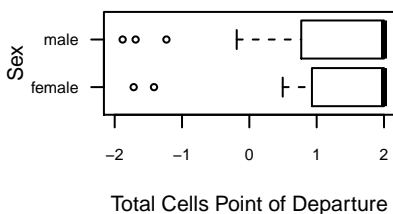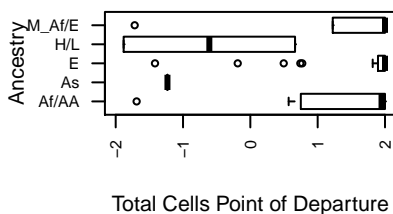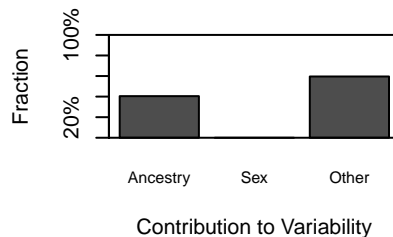

# Tebuconazole 105

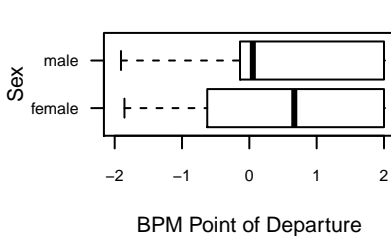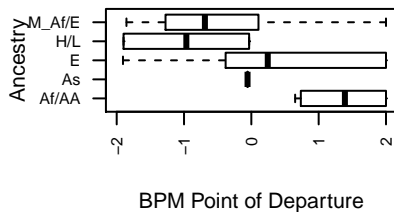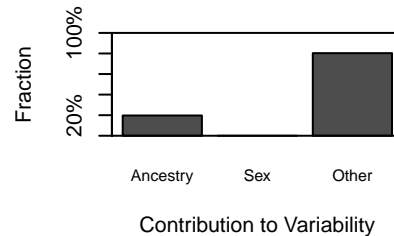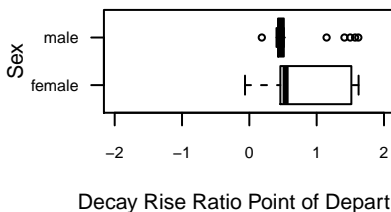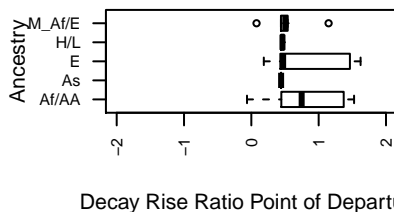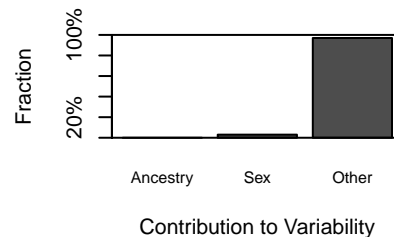

Decay Rise Ratio Point of Departure

Decay Rise Ratio Point of Departure

Contribution to Variability

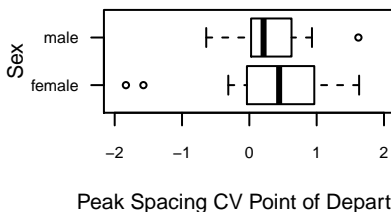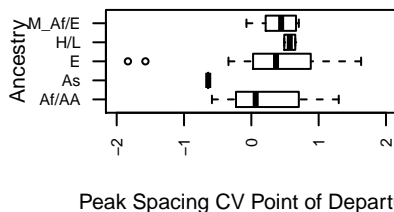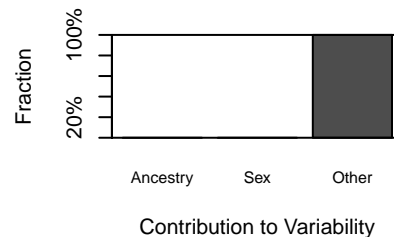

Peak Spacing CV Point of Departure

Peak Spacing CV Point of Departure

Contribution to Variability

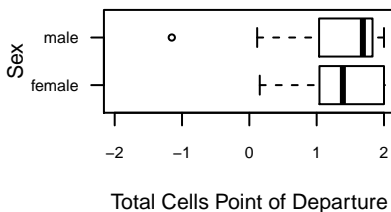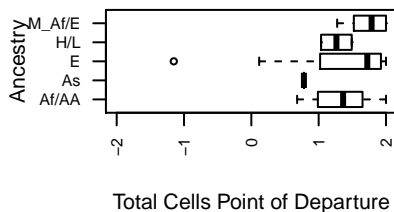

Total Cells Point of Departure

Total Cells Point of Departure

Contribution to Variability

# Aldrin 106

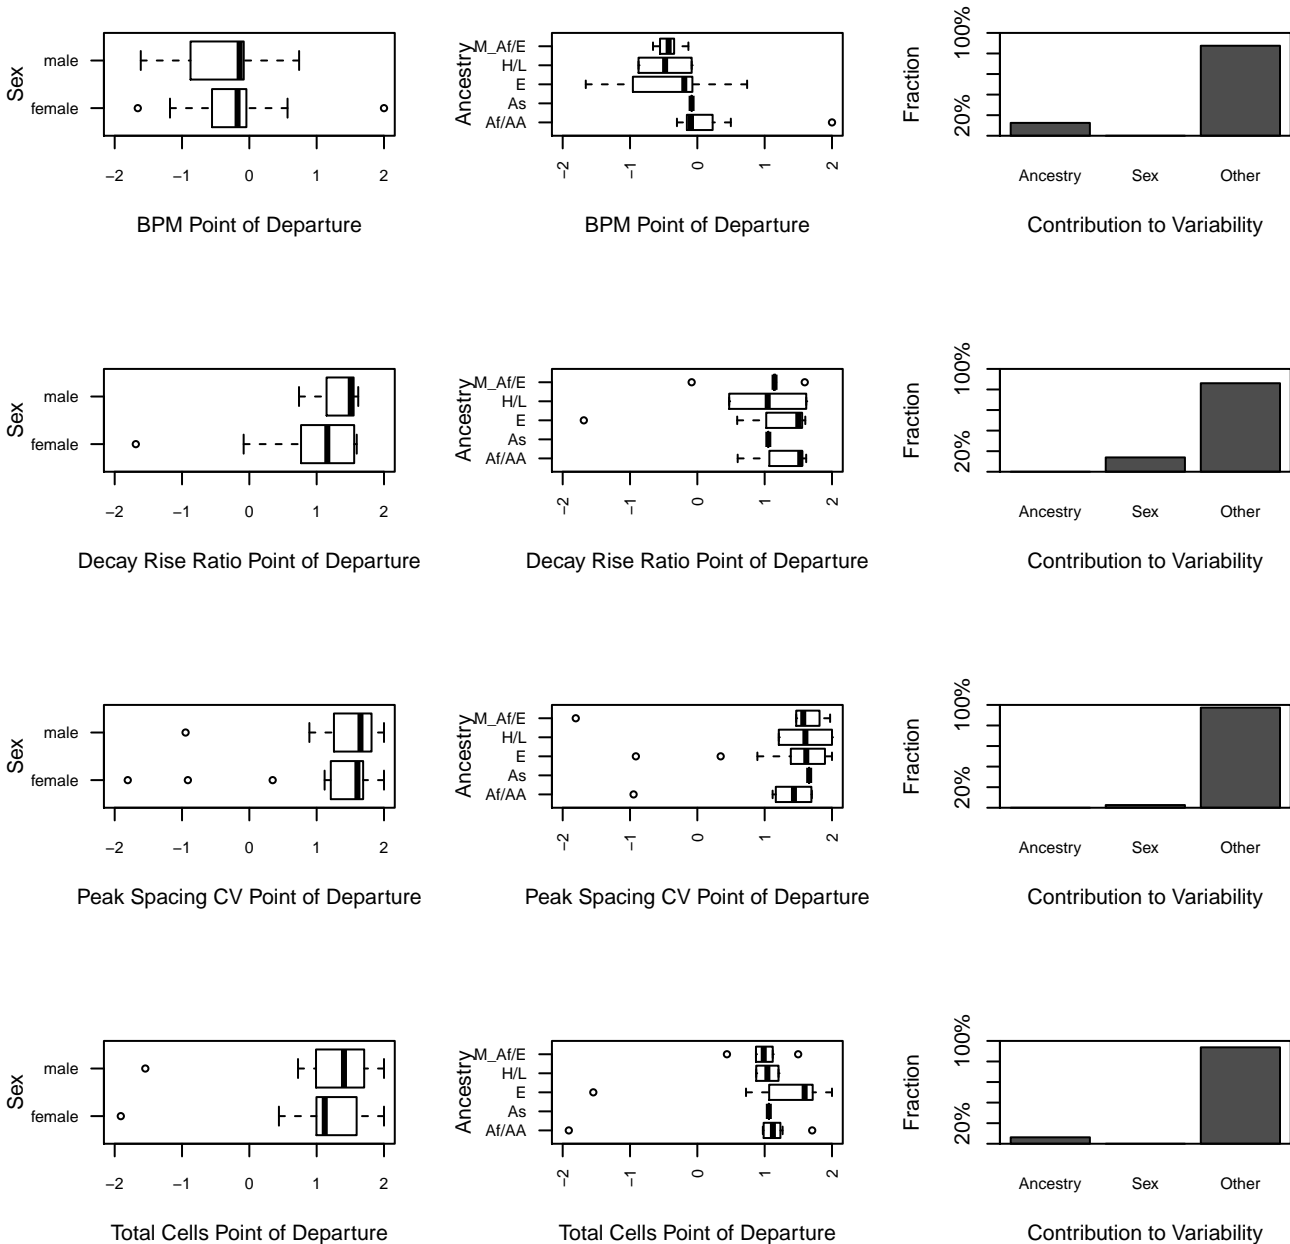

# Tris(methylphenyl)phosphate 107

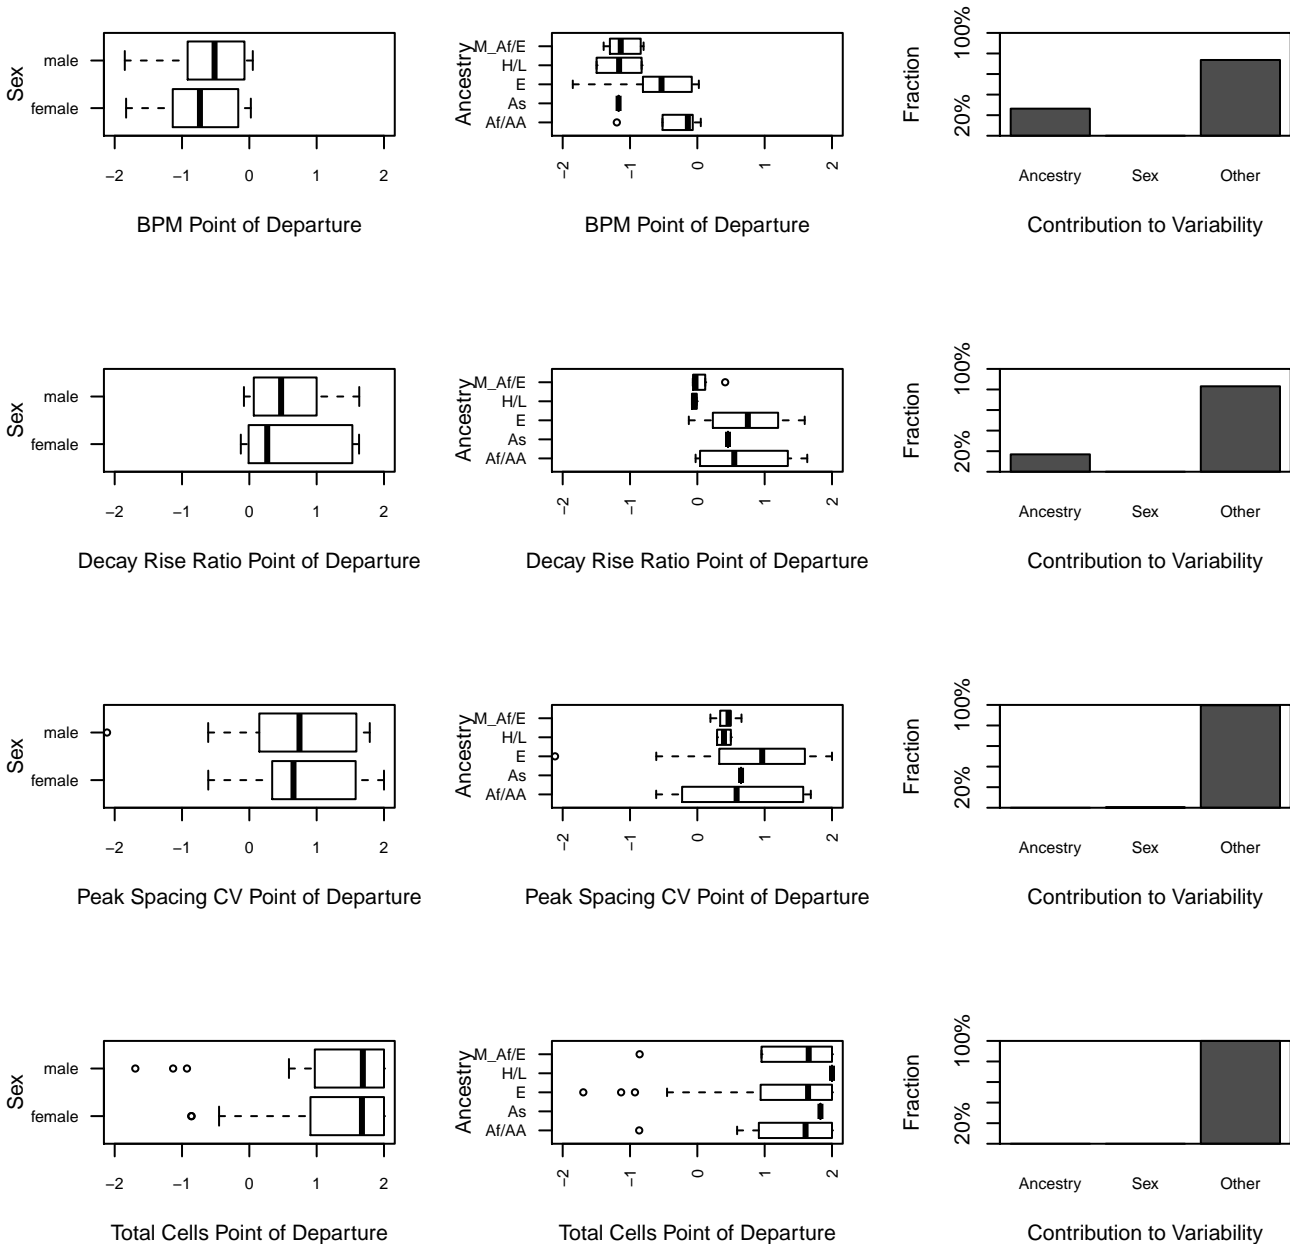

# Atenolol 108

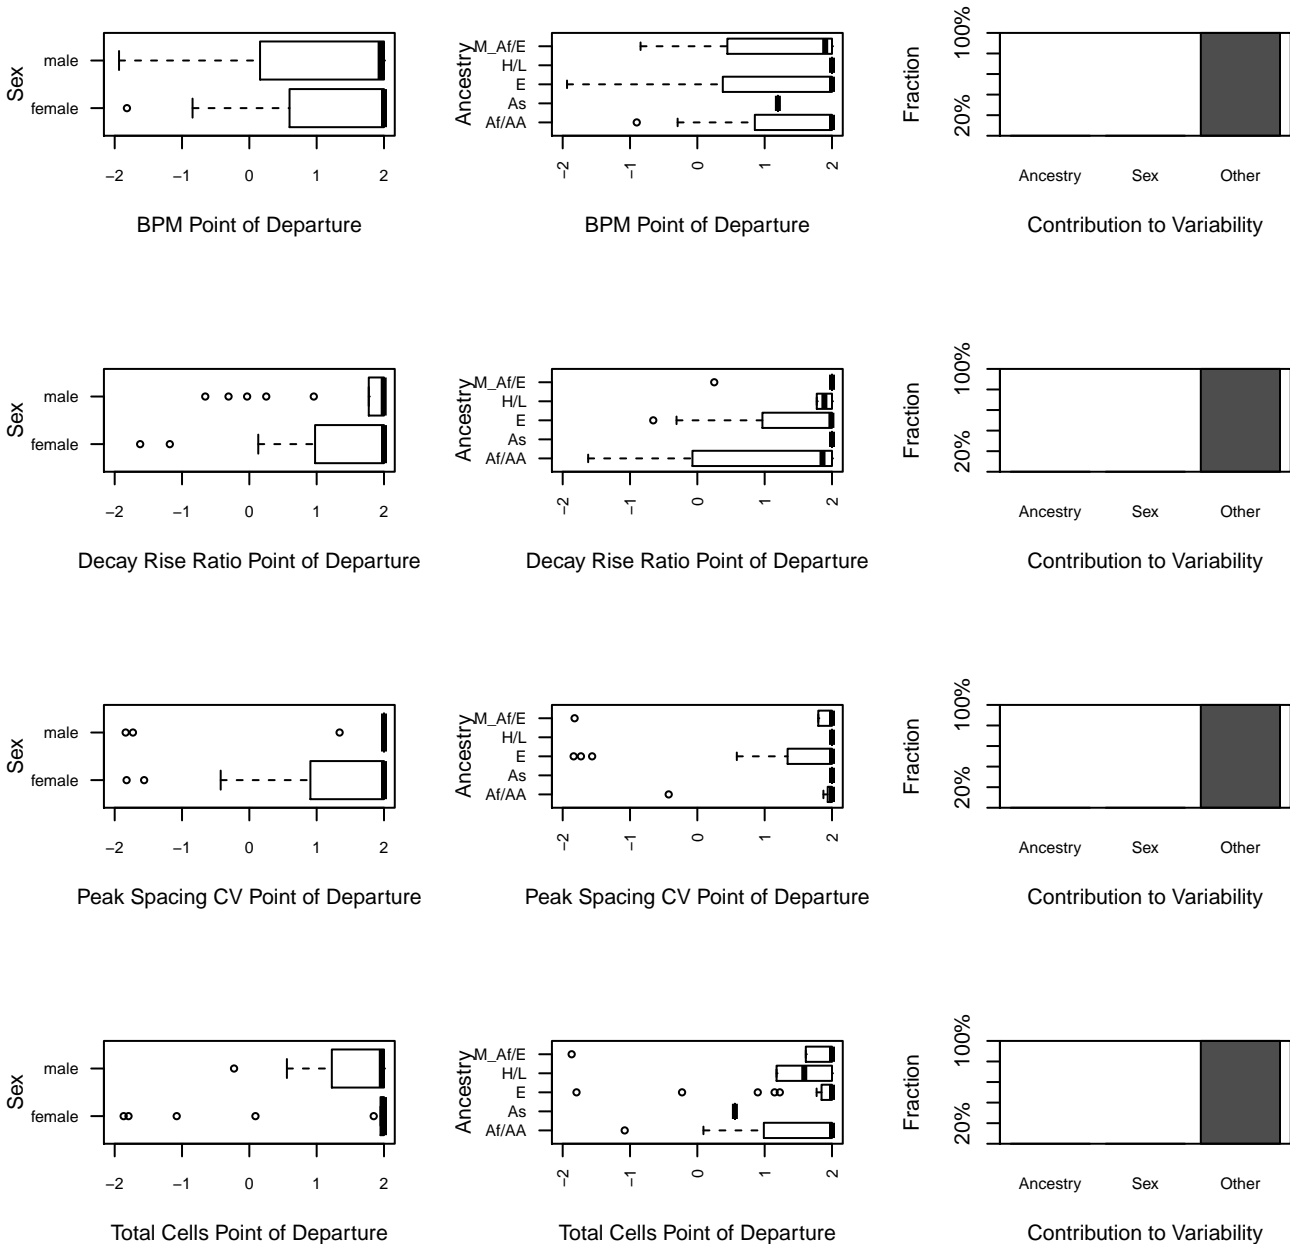

# L-Ascorbic\_acid 109

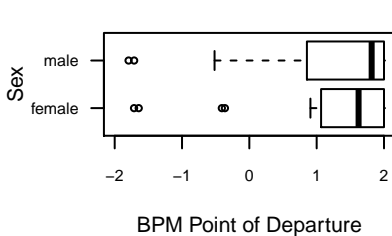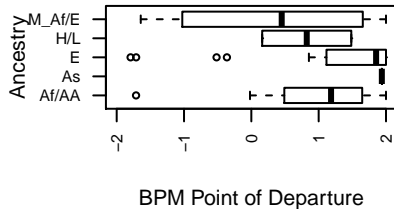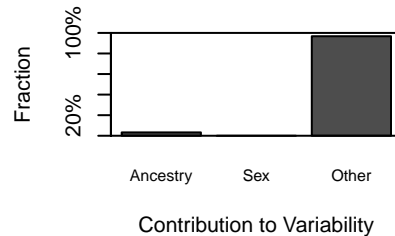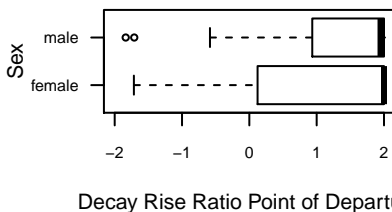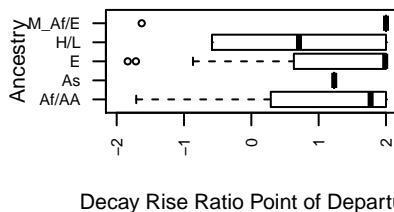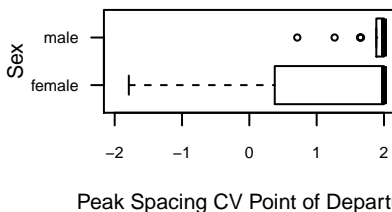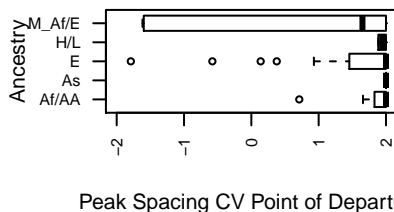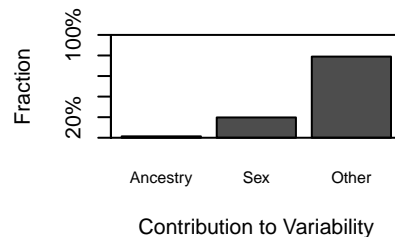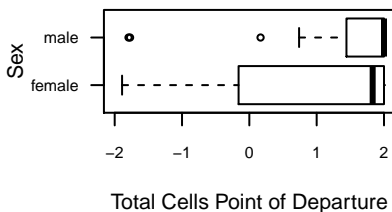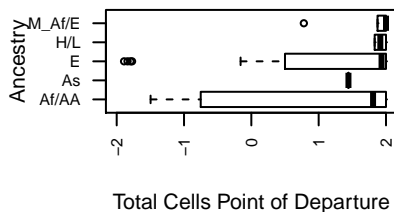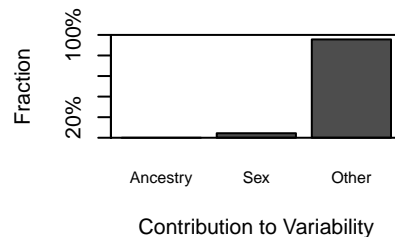

# Verapamil\_hydrochloride 110

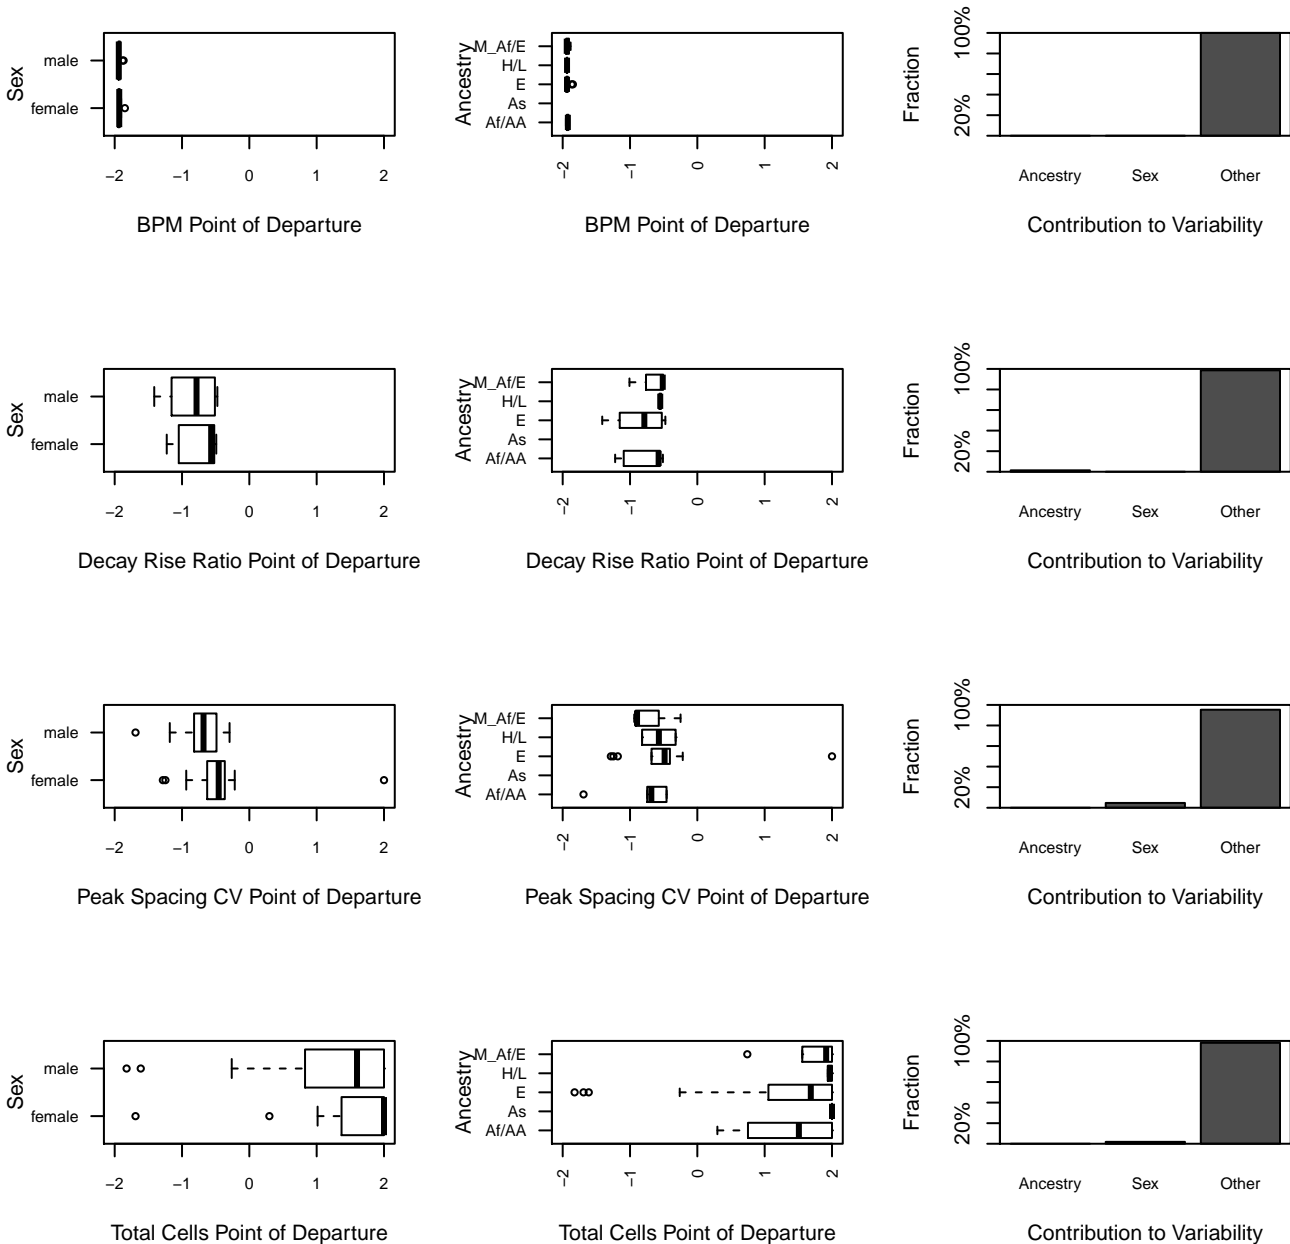

# Benzo(k)fluoranthene 111

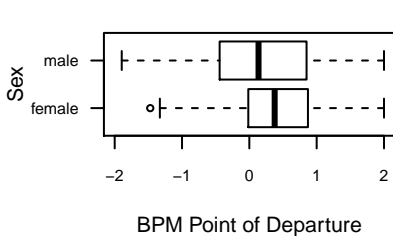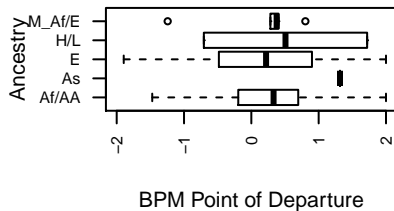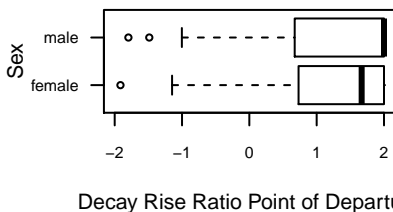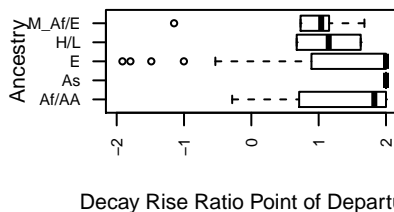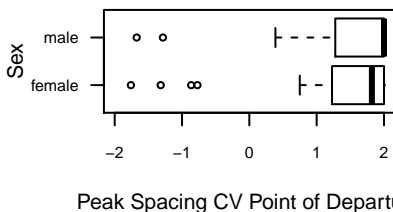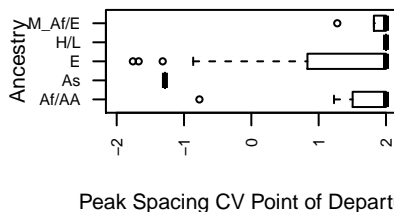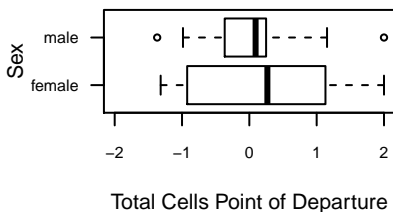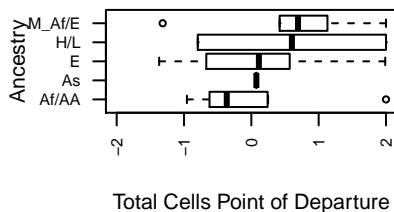



# Dibenz[a,c]anthracene 112

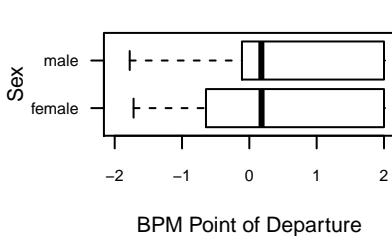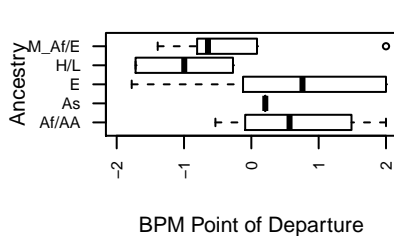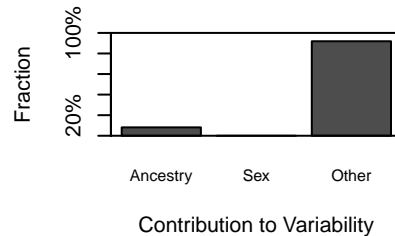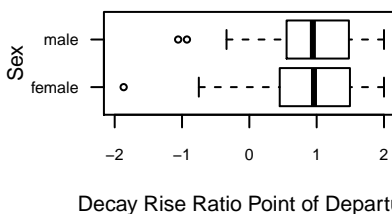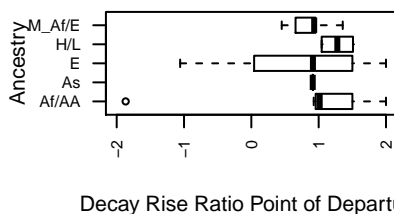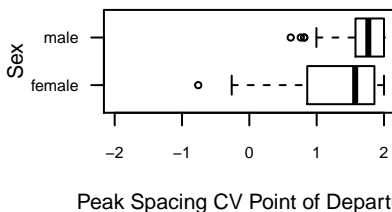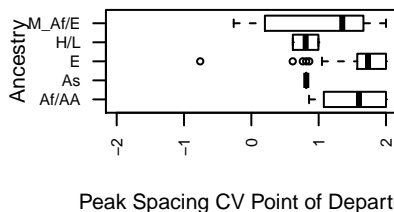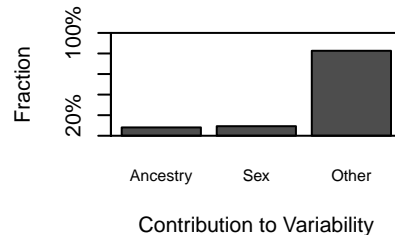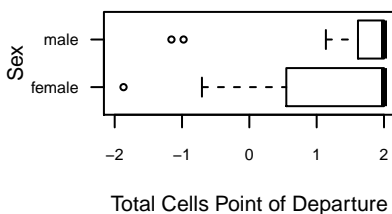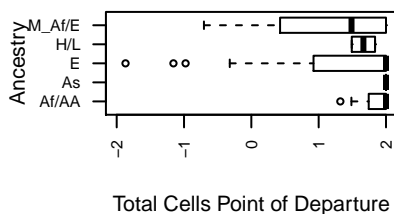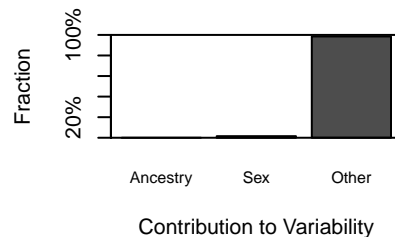

# Methylmercuric(2)chloride 113

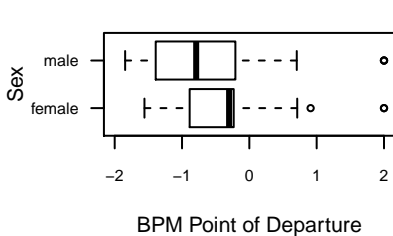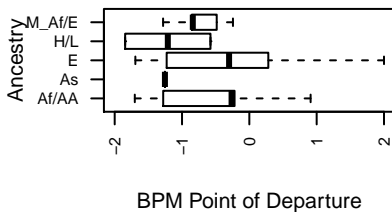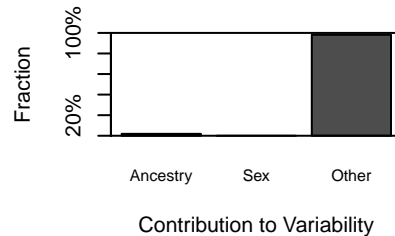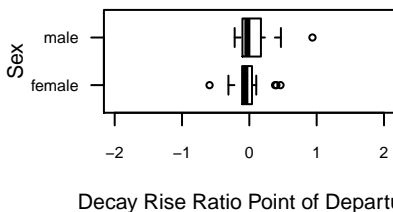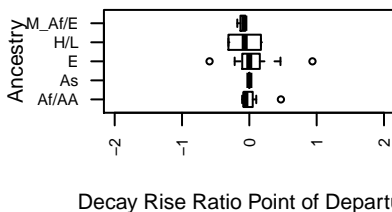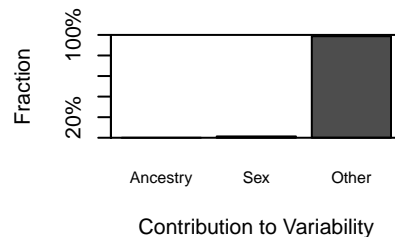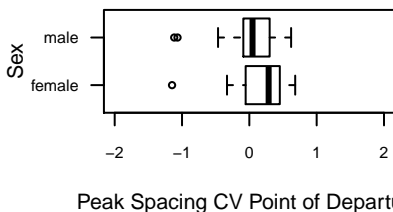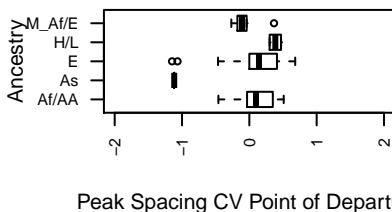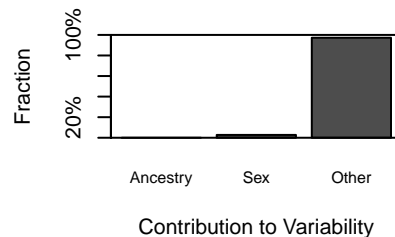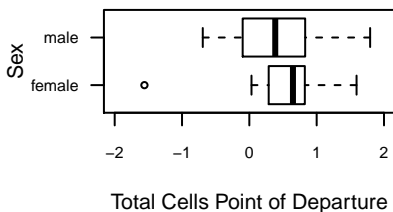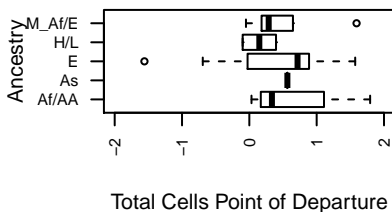

# Isodecyl\_diphenyl\_phosphate 114

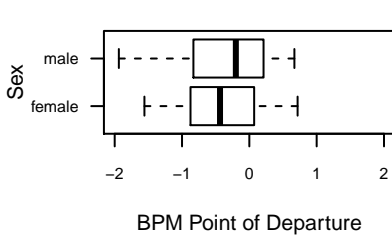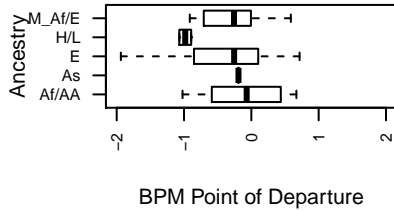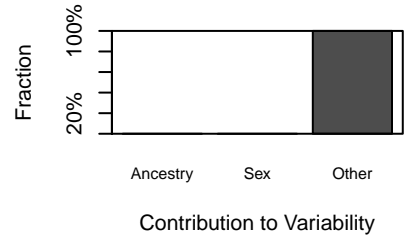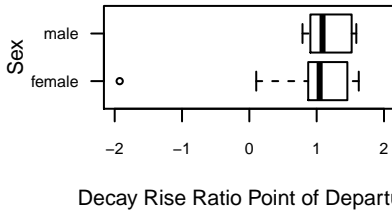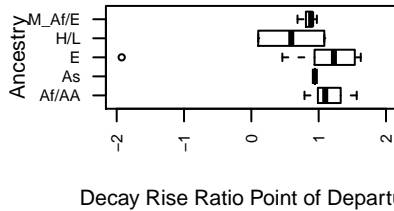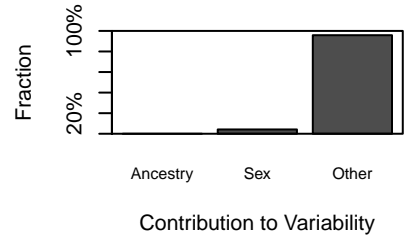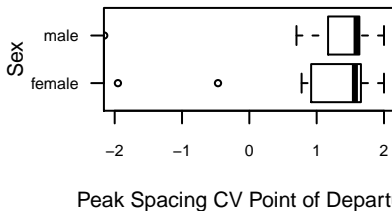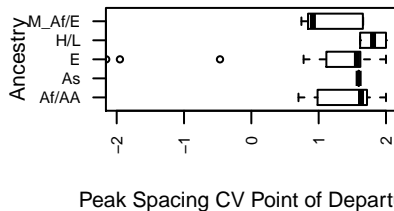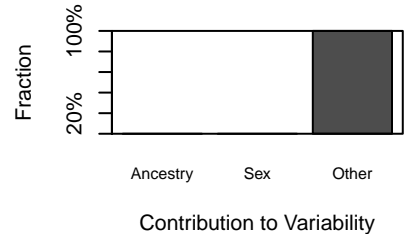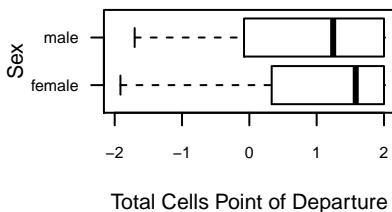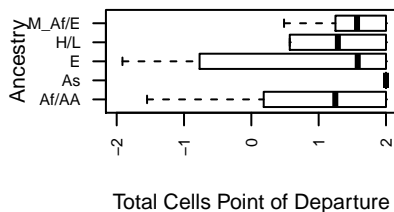

# tert-Butylhydroquinone 115

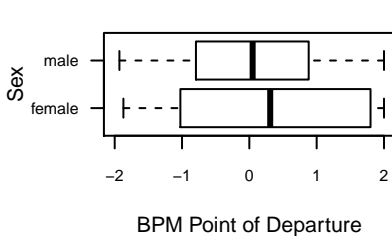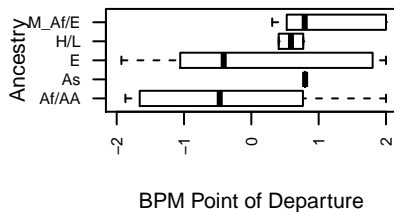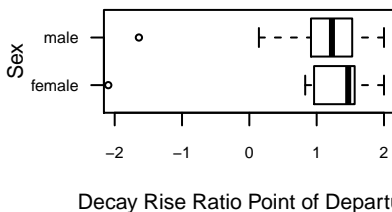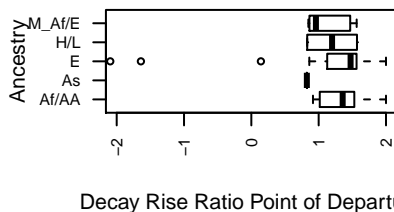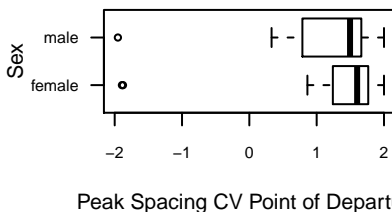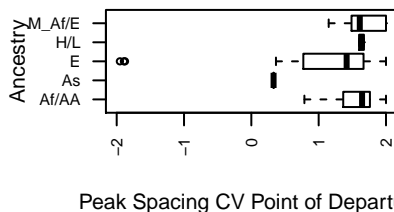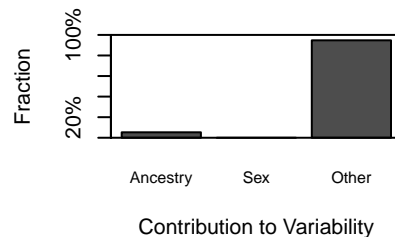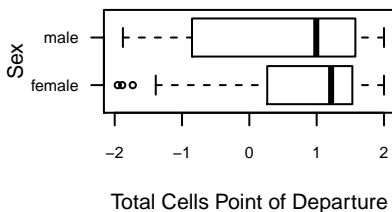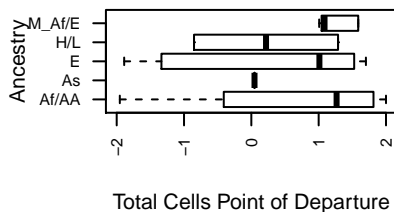

# Deltamethrin 116

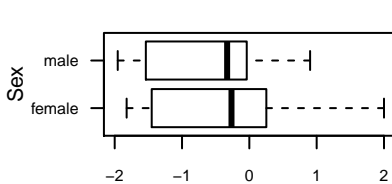

BPM Point of Departure

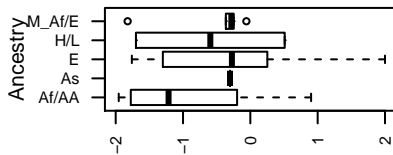

BPM Point of Departure

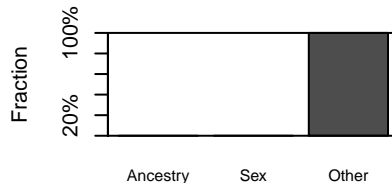

Contribution to Variability

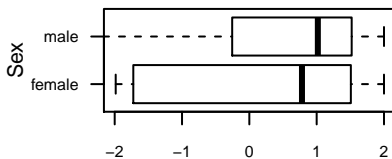

Decay Rise Ratio Point of Departure

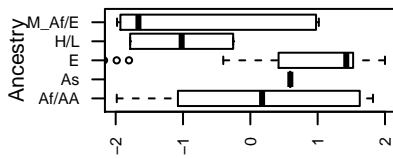

Decay Rise Ratio Point of Departure

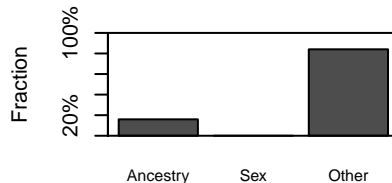

Contribution to Variability

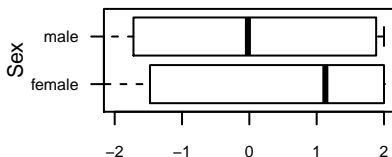

Peak Spacing CV Point of Departure

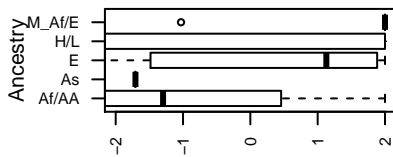

Peak Spacing CV Point of Departure

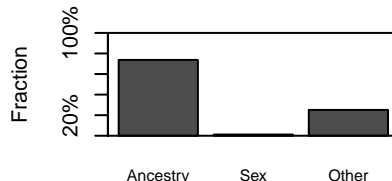

Contribution to Variability

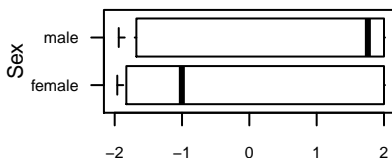

Total Cells Point of Departure

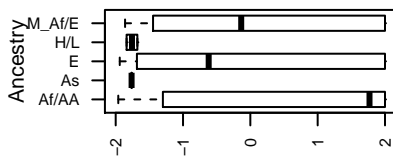

Total Cells Point of Departure

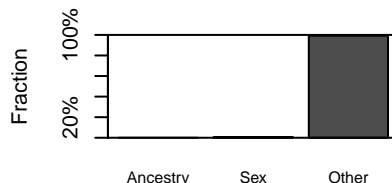

Contribution to Variability

# Fluorene 117

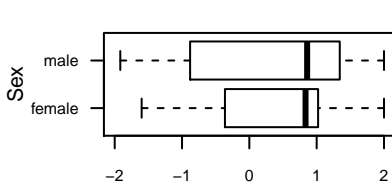

BPM Point of Departure

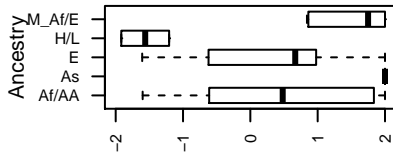

BPM Point of Departure

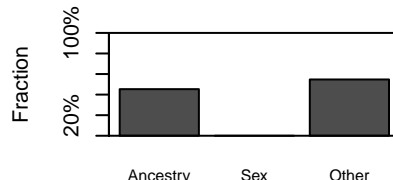

Contribution to Variability

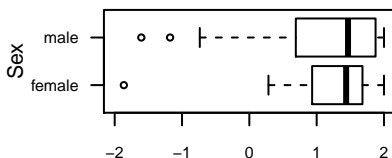

Decay Rise Ratio Point of Departure

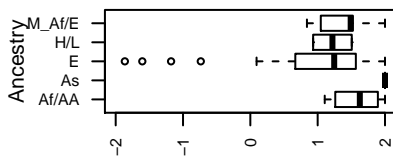

Decay Rise Ratio Point of Departure

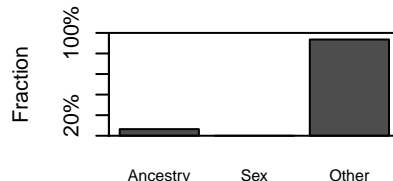

Contribution to Variability

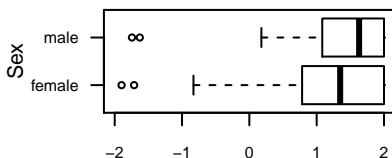

Peak Spacing CV Point of Departure

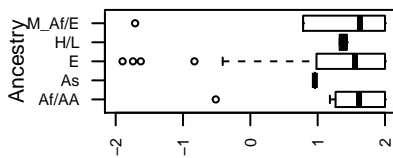

Peak Spacing CV Point of Departure



Contribution to Variability

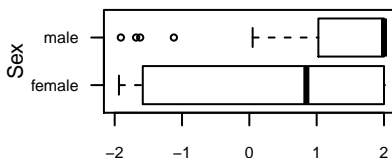

Total Cells Point of Departure

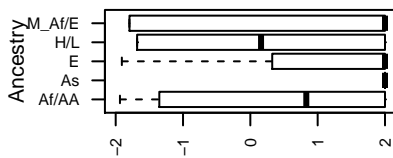

Total Cells Point of Departure

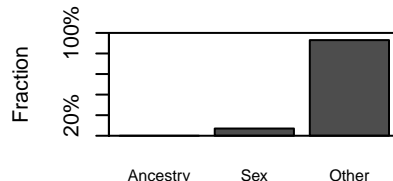

Contribution to Variability

# Pyrimethamine 118

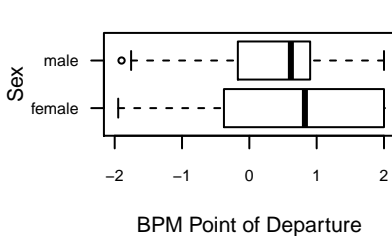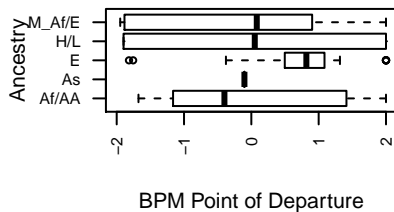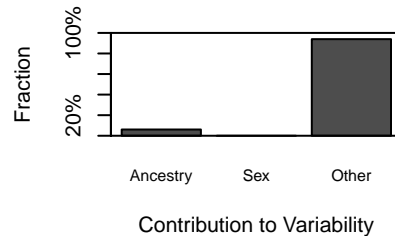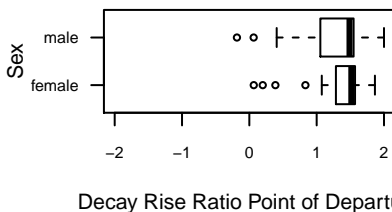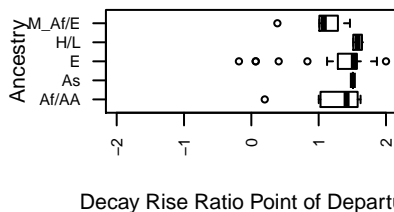

Decay Rise Ratio Point of Departure

Decay Rise Ratio Point of Departure

Contribution to Variability

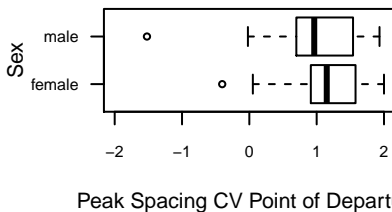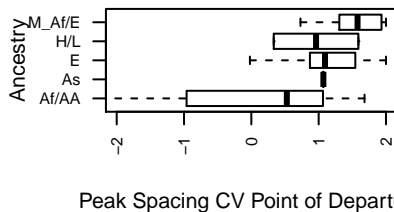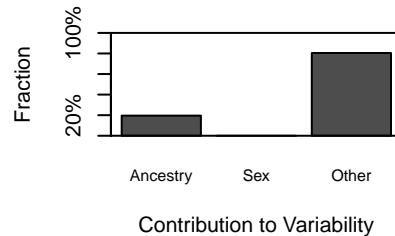

Peak Spacing CV Point of Departure

Peak Spacing CV Point of Departure

Contribution to Variability

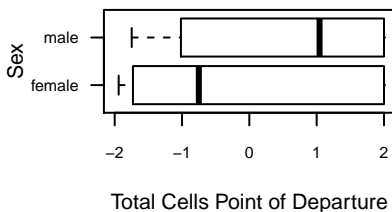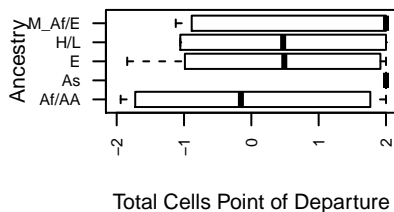

Total Cells Point of Departure

Total Cells Point of Departure

Contribution to Variability

# Endosulfan 119

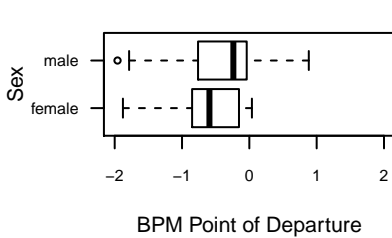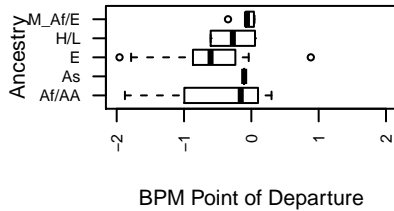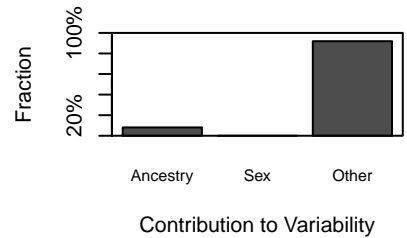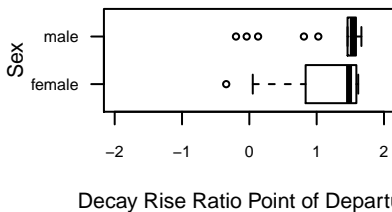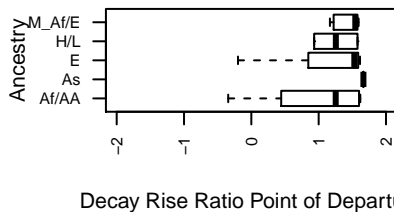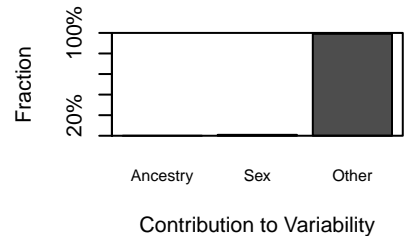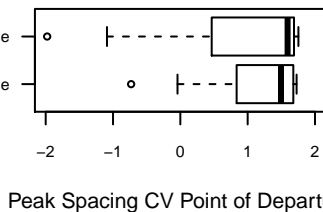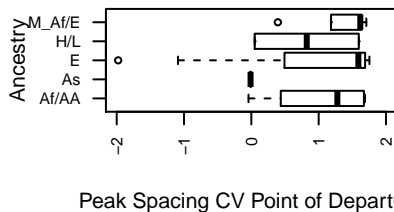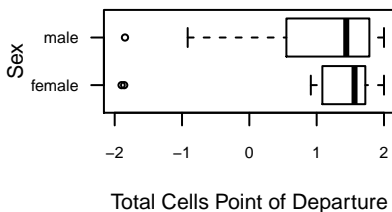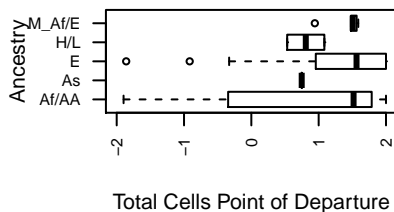



# Ranitidine 120

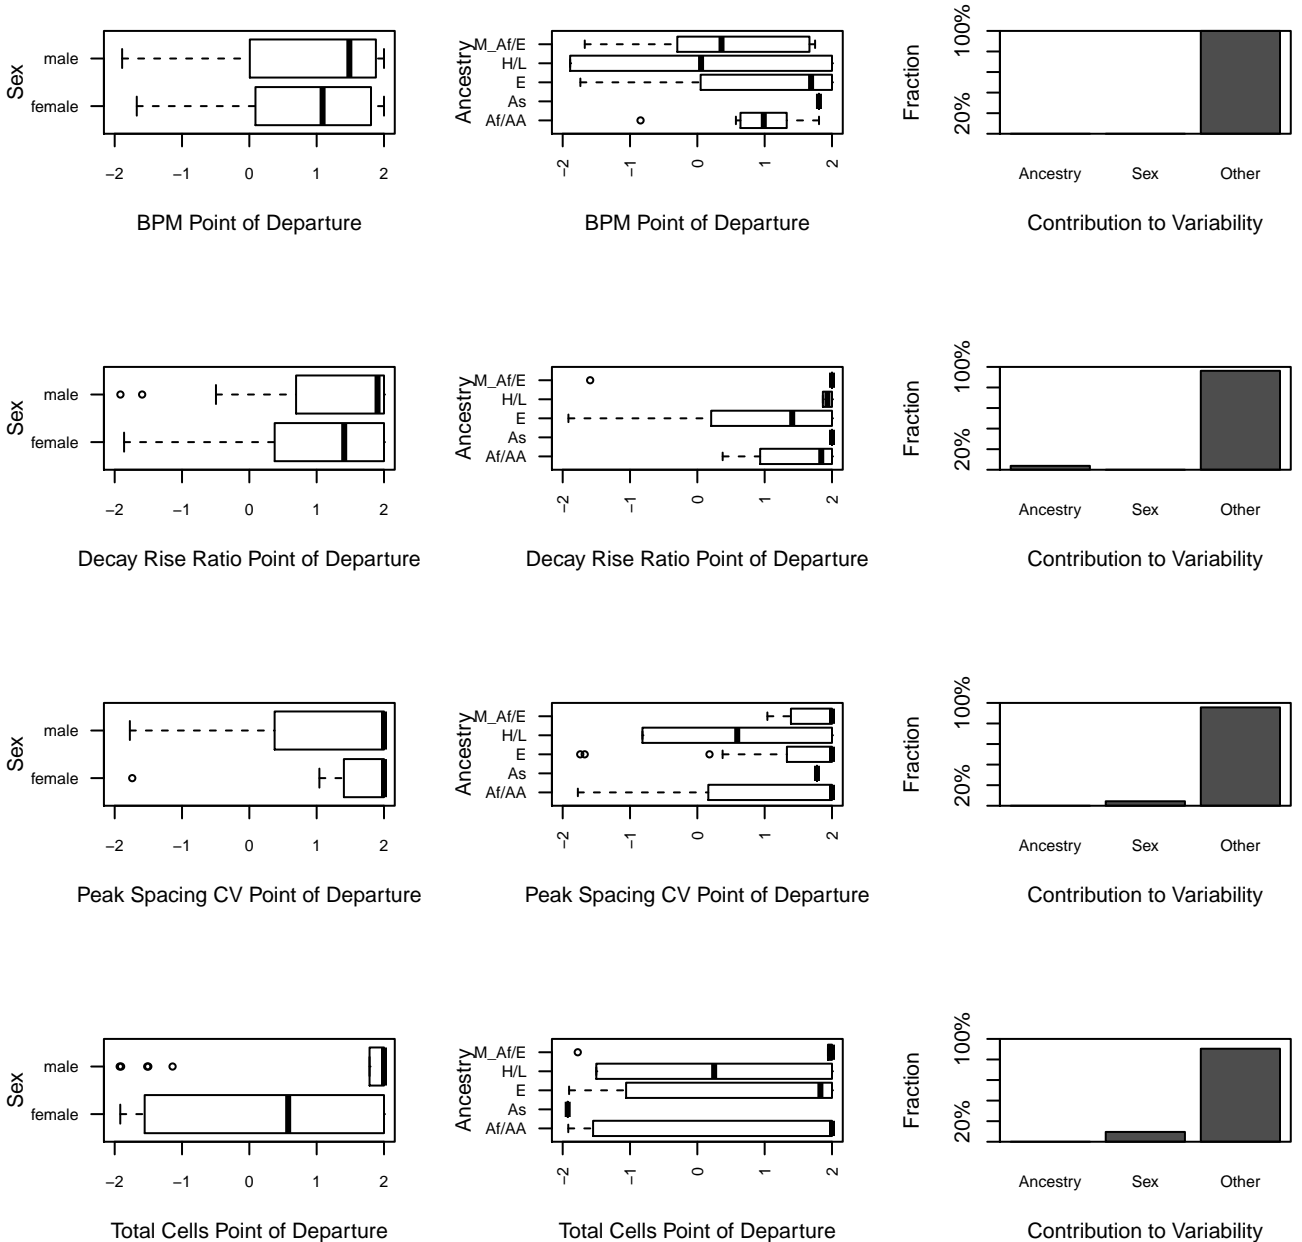

# Pyrene 121

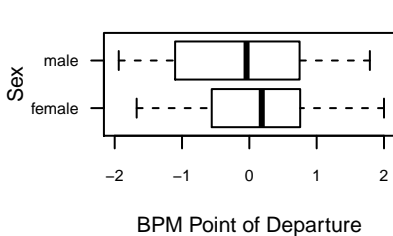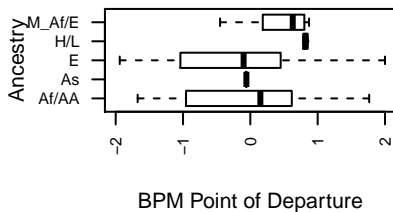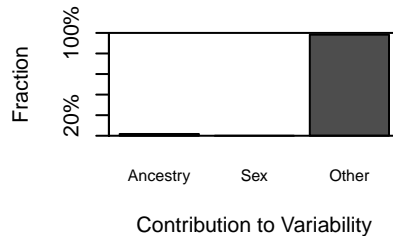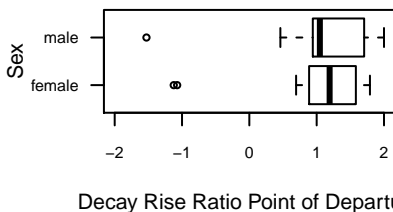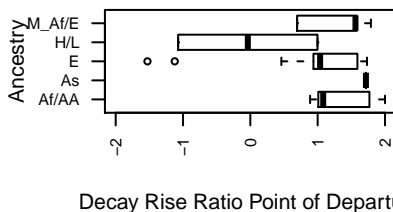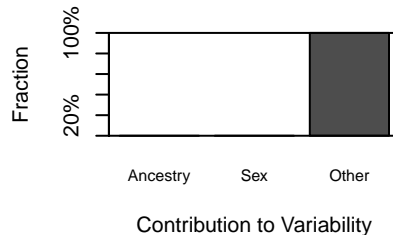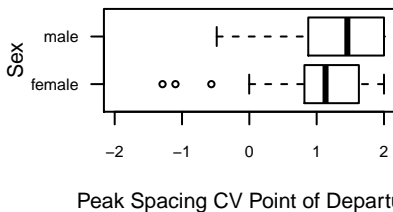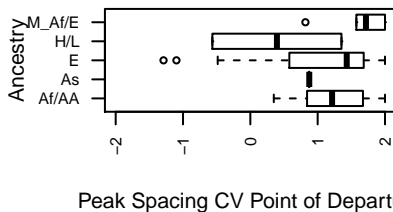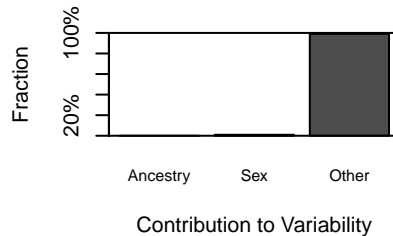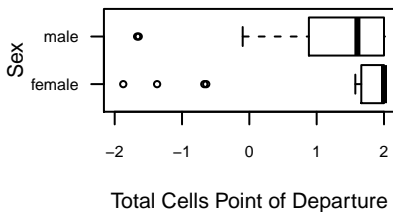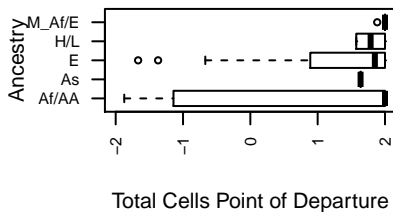

# Methylparaben 122

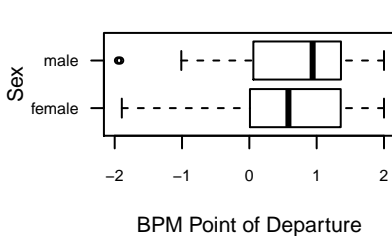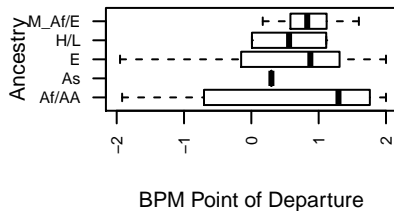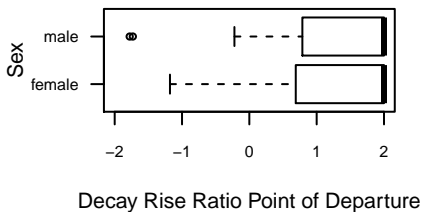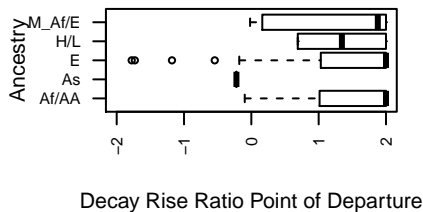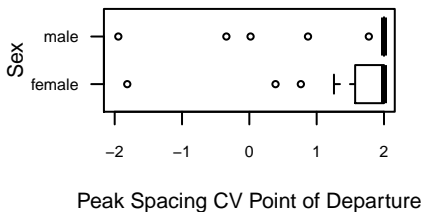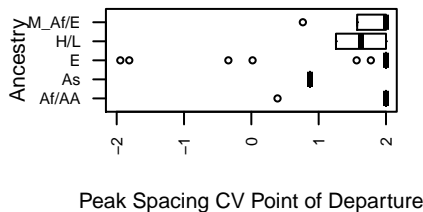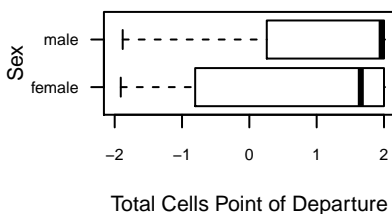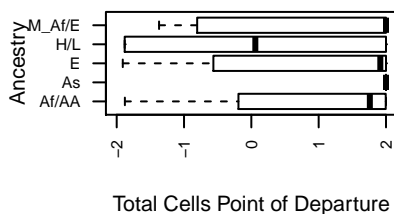

# 1,4-Benzoquinone 123

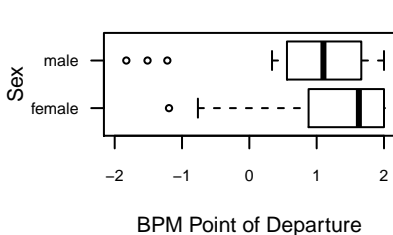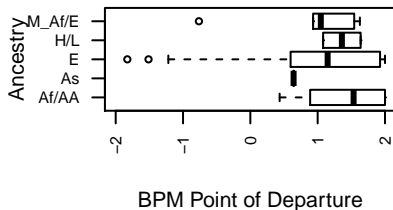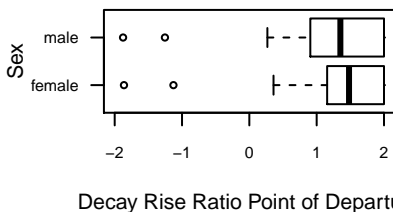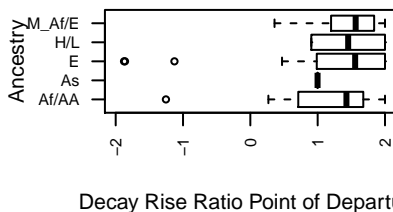

Decay Rise Ratio Point of Departure

Decay Rise Ratio Point of Departure

Contribution to Variability

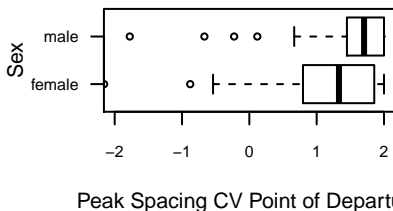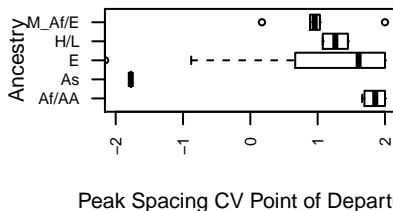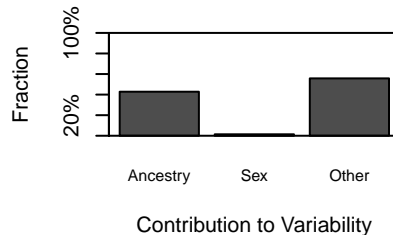

Peak Spacing CV Point of Departure

Peak Spacing CV Point of Departure

Contribution to Variability

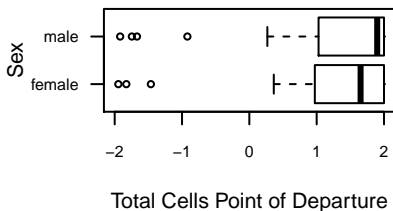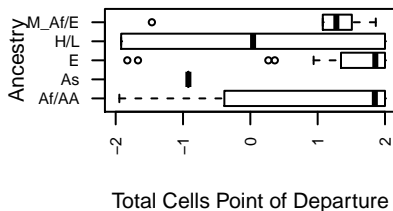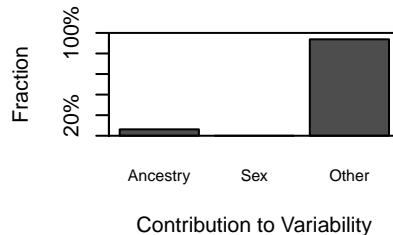

Total Cells Point of Departure

Total Cells Point of Departure

Contribution to Variability

# Propyl\_gallate 124

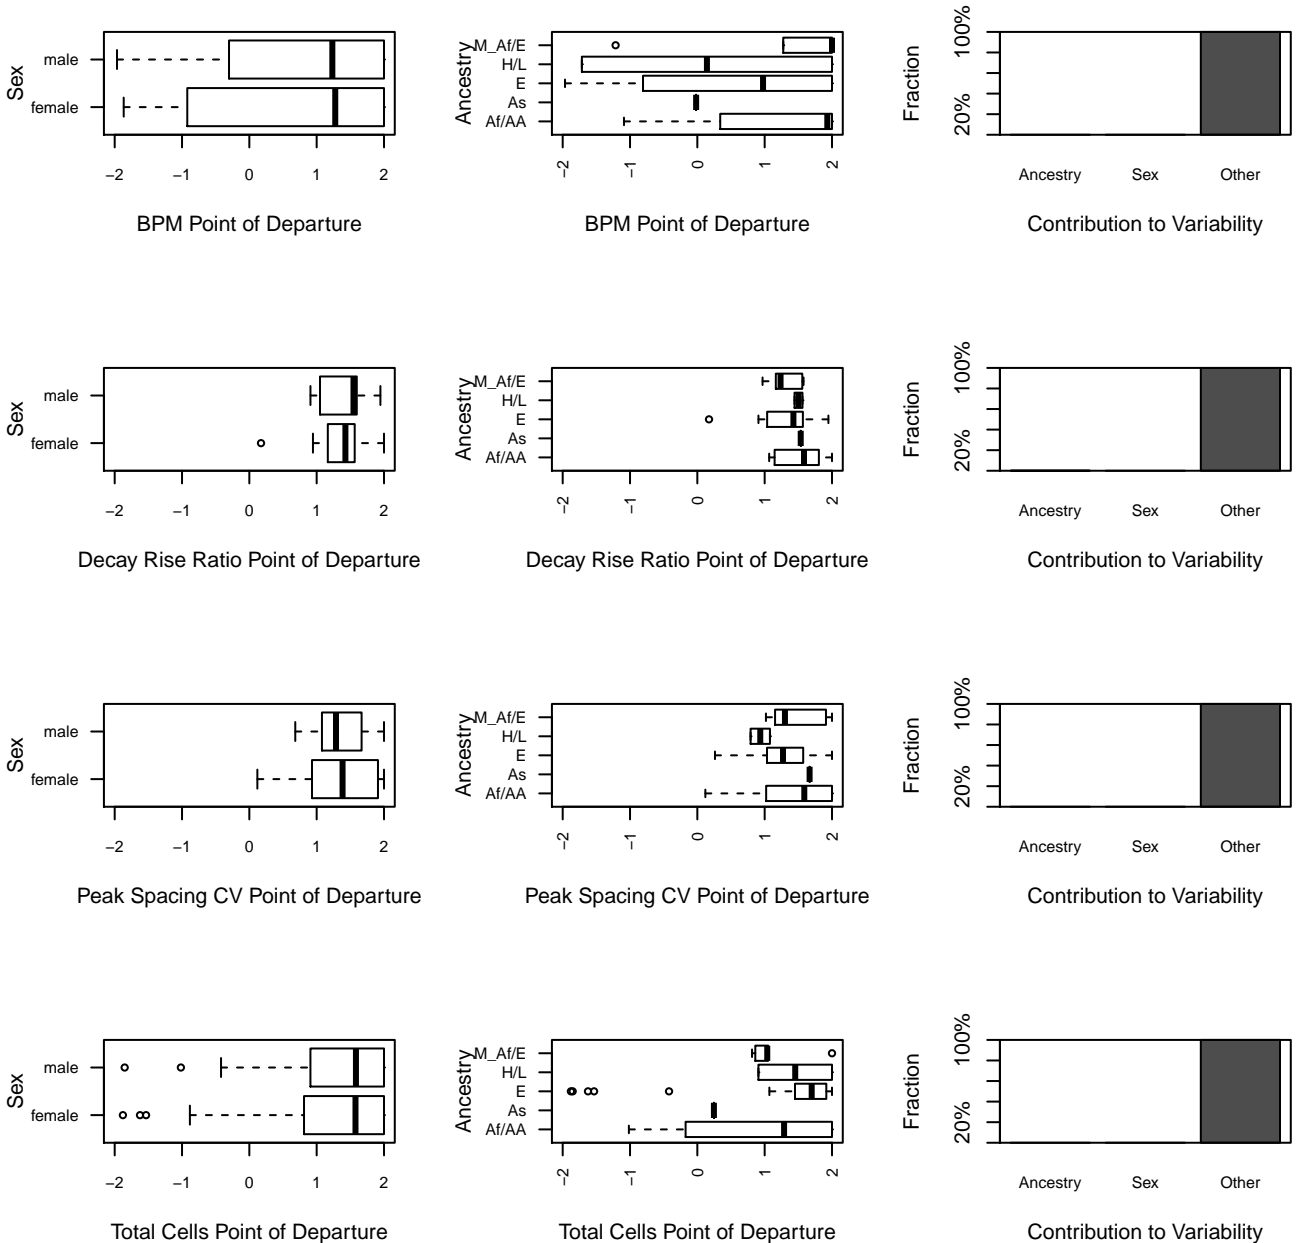

# Citric\_acid 125

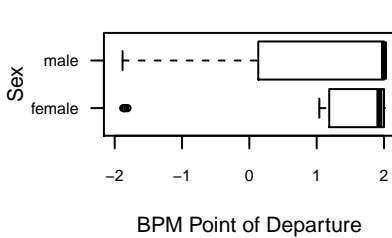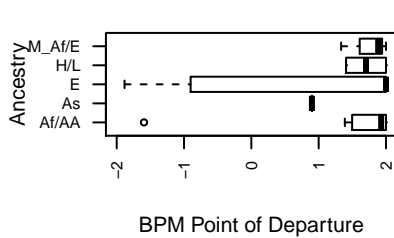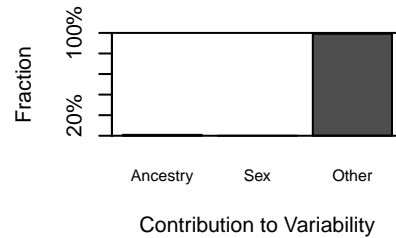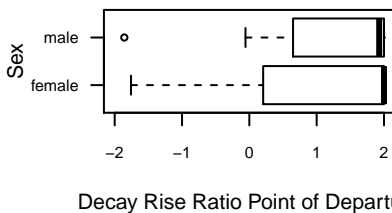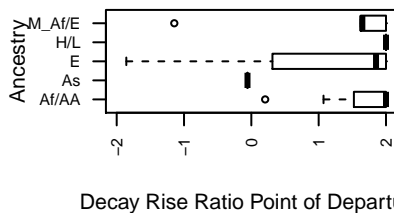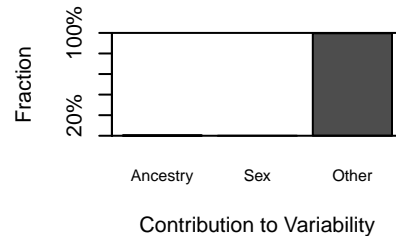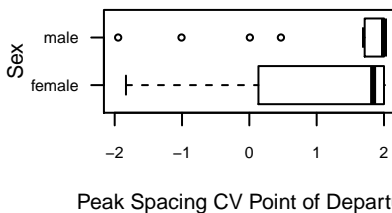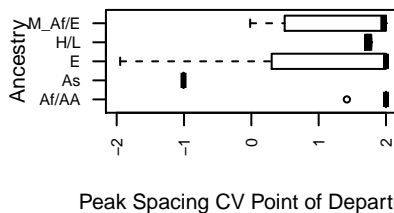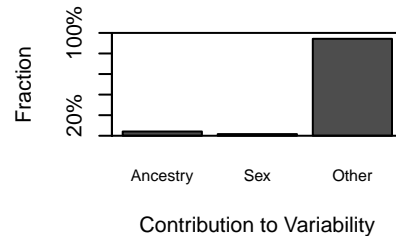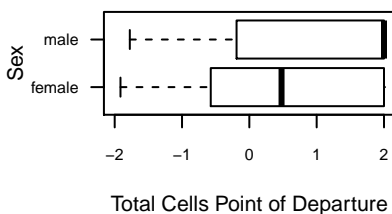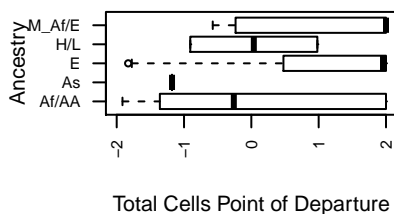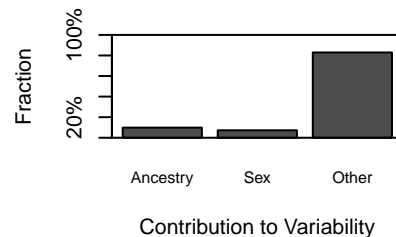

# Sodium\_valproate 126

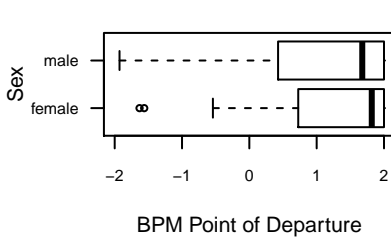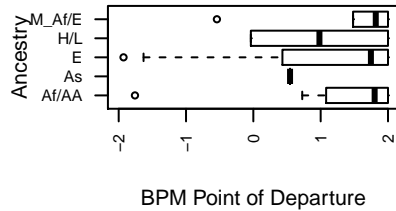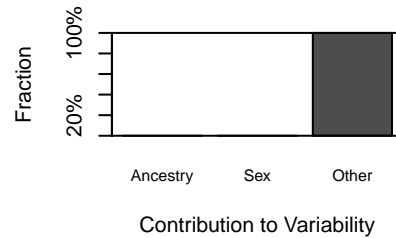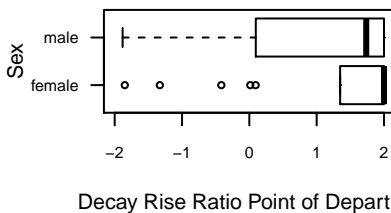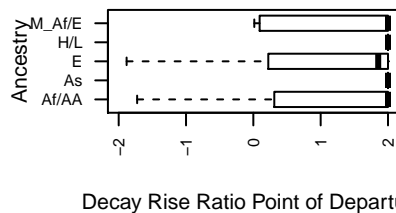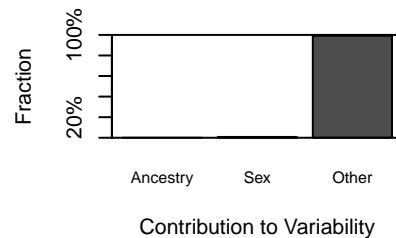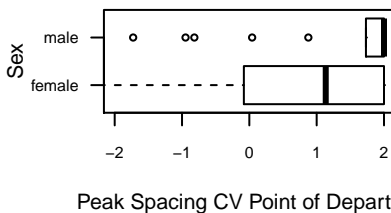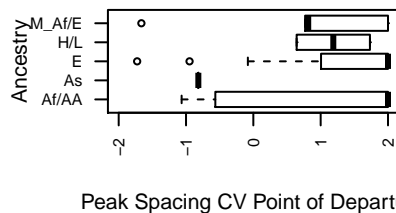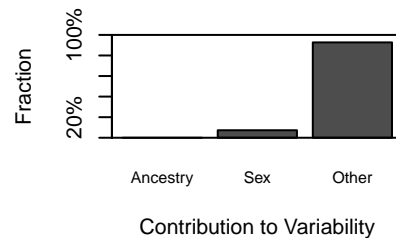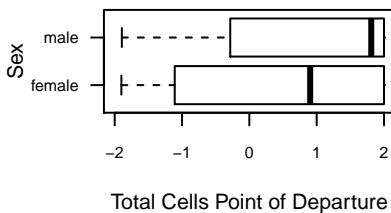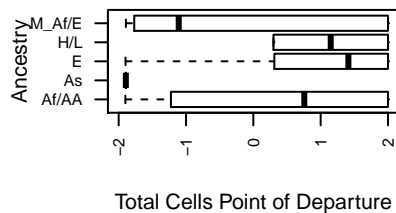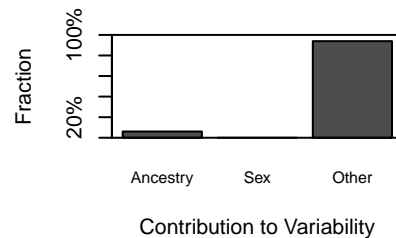

# Benzo(b)fluoranthene 127

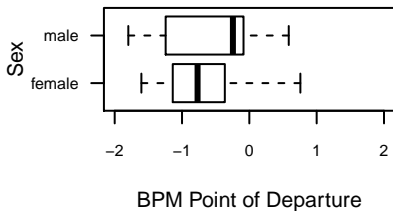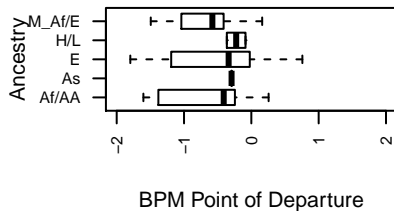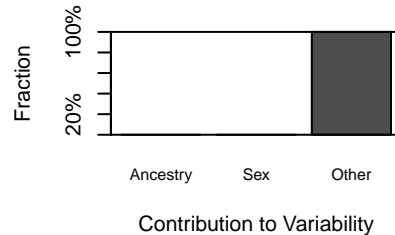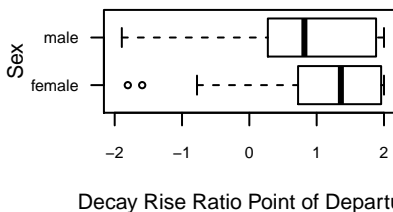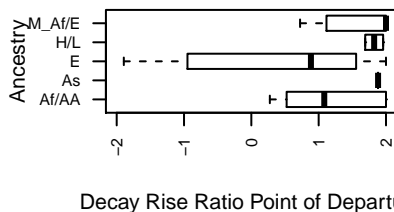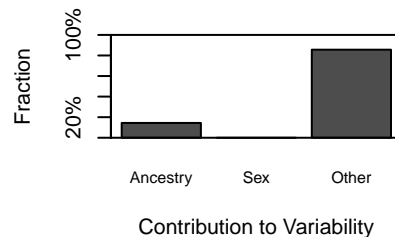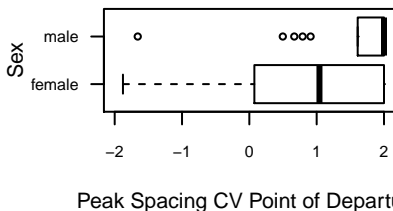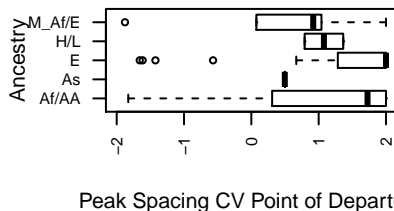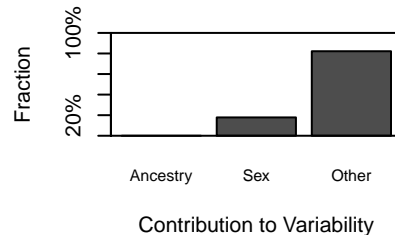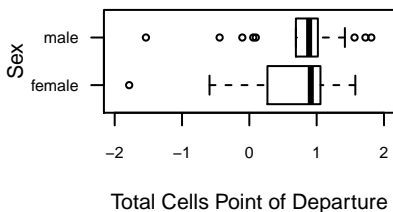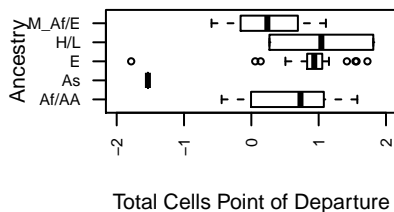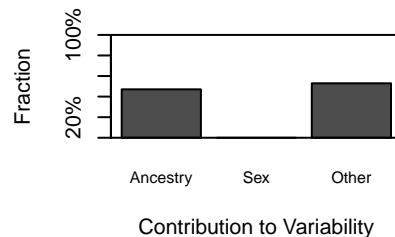



# Biotin 128

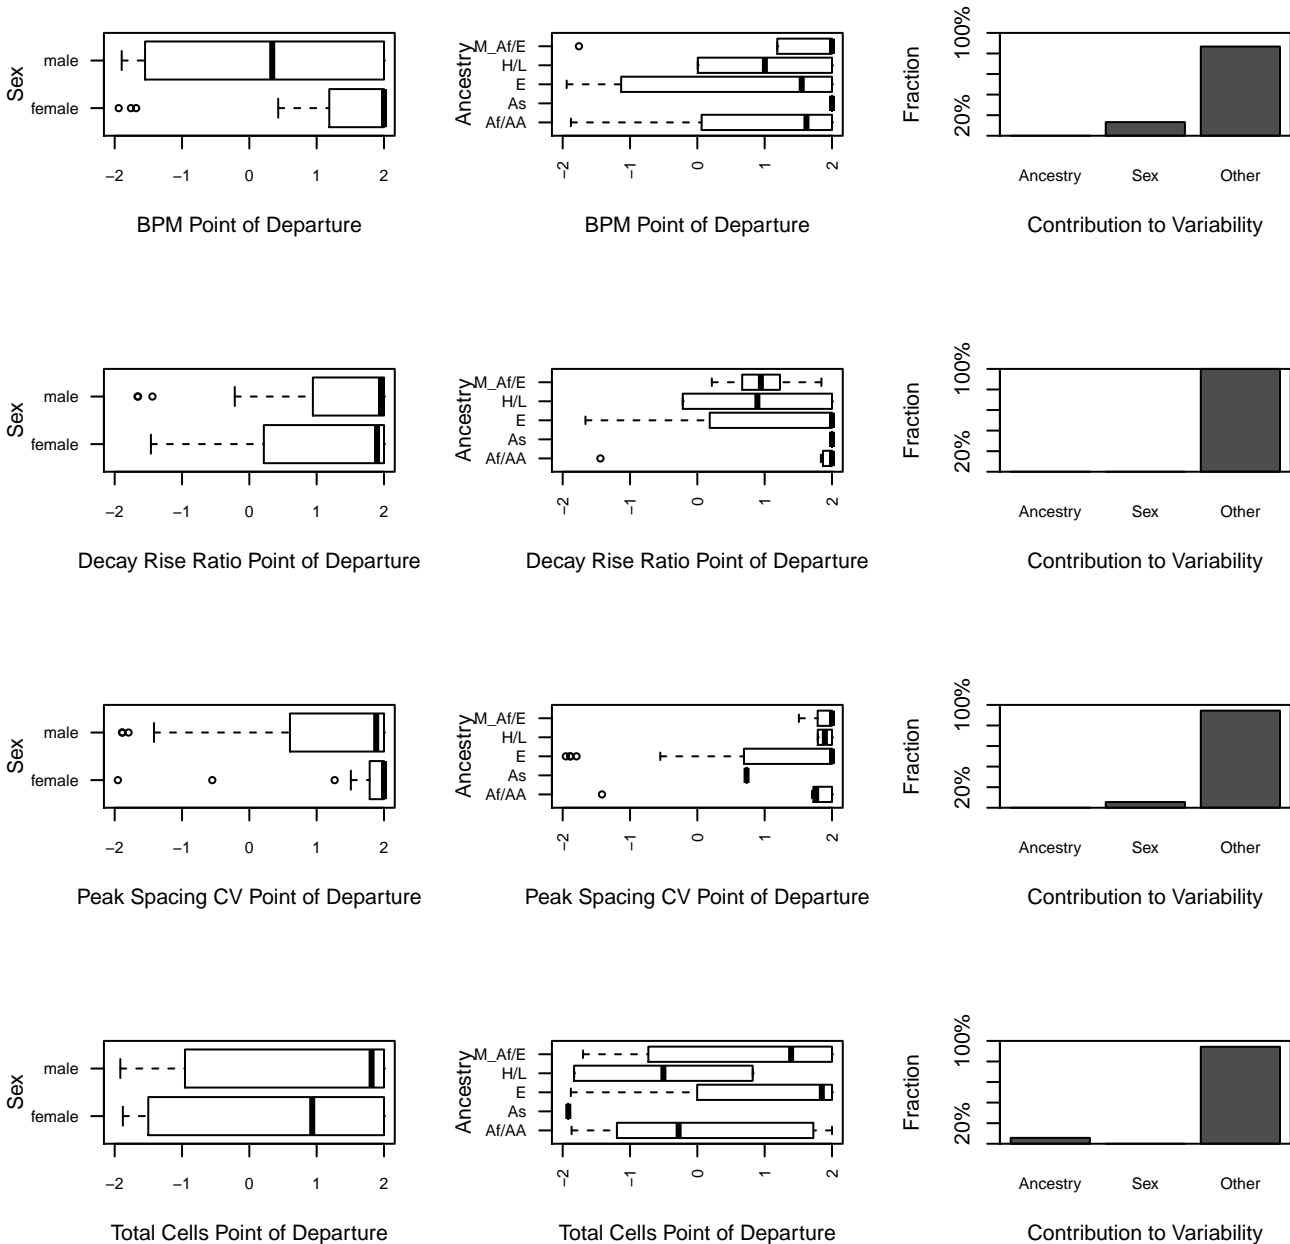

# Dichlorodiphenyltrichloroethane 129

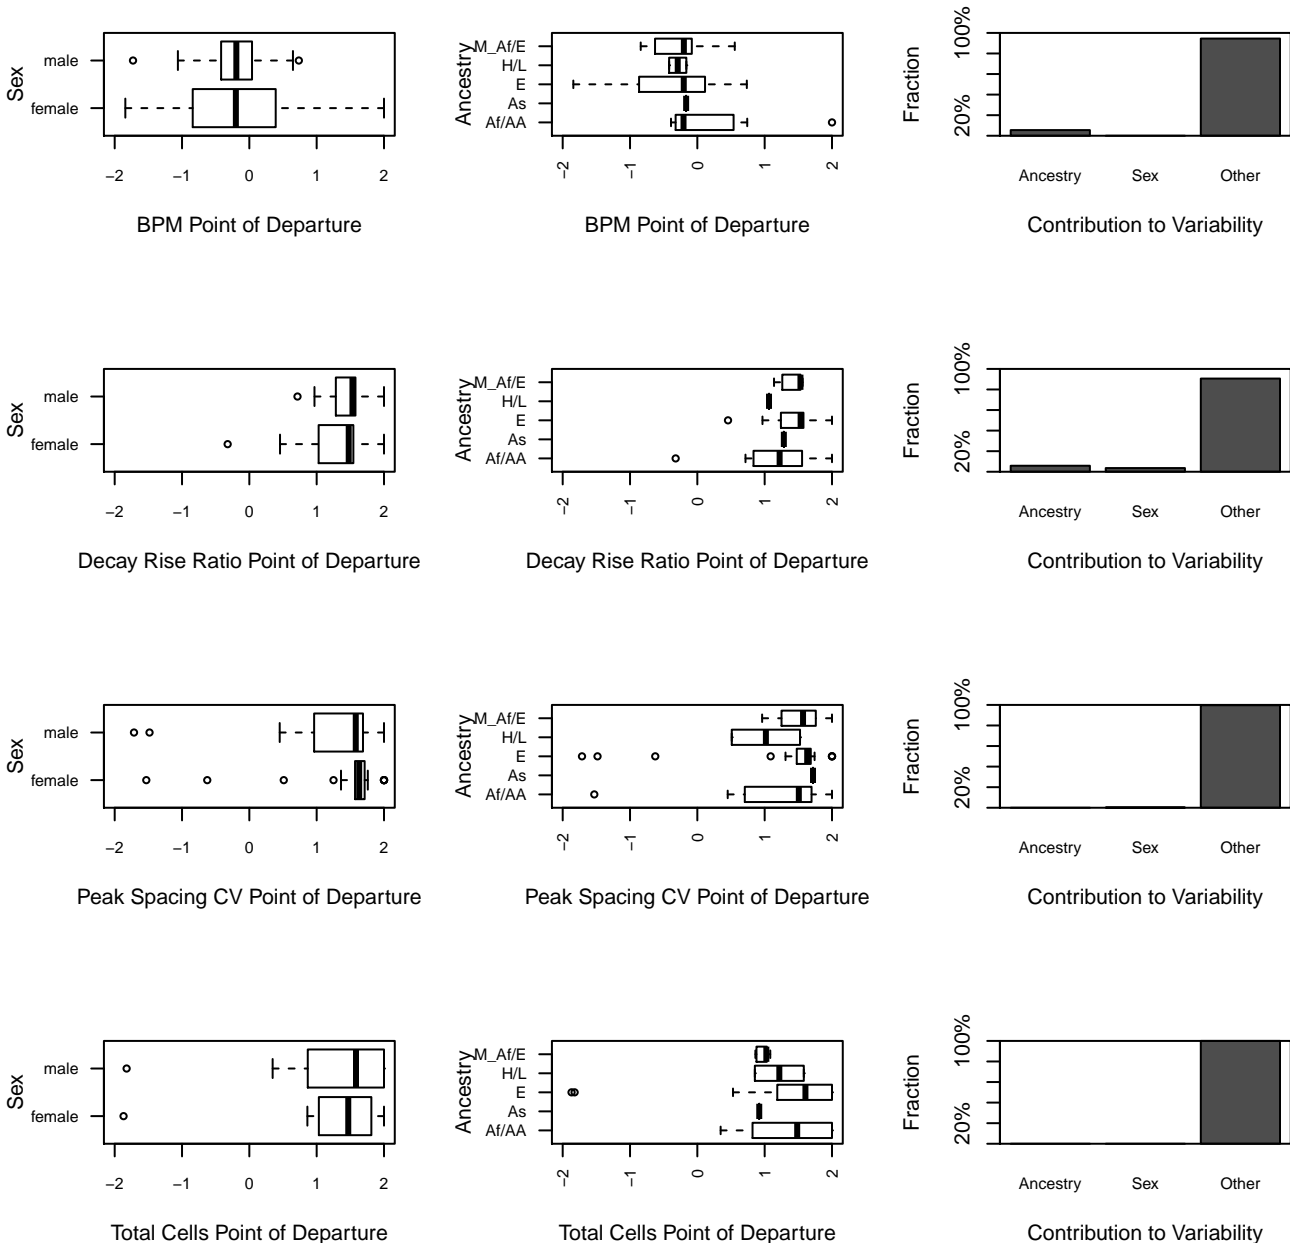

# Hydroxyurea 130

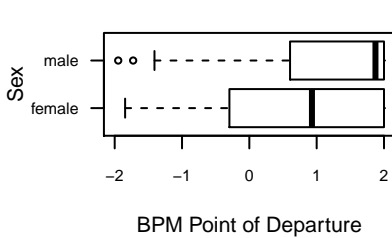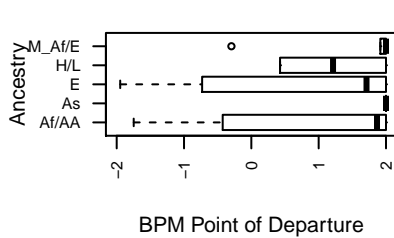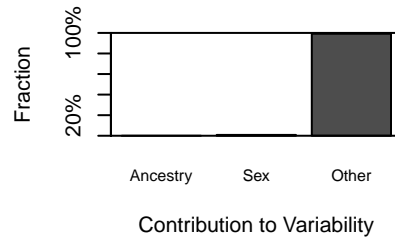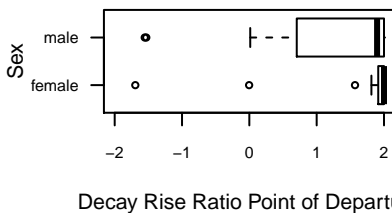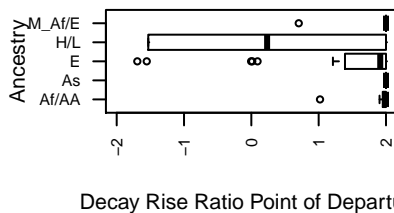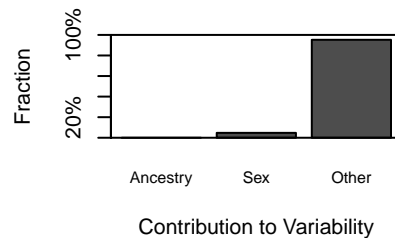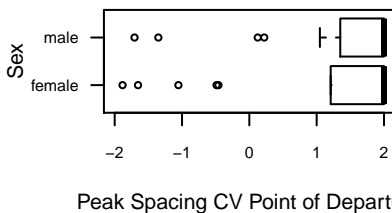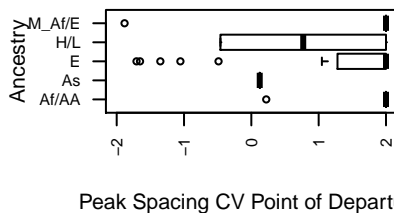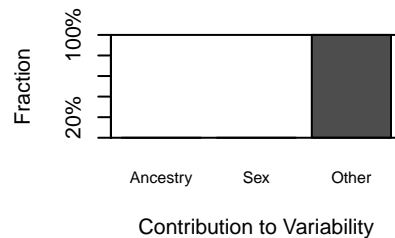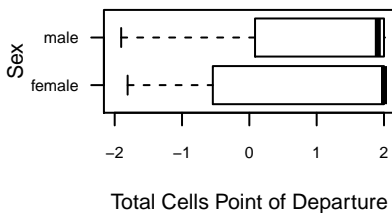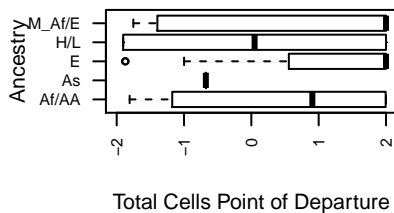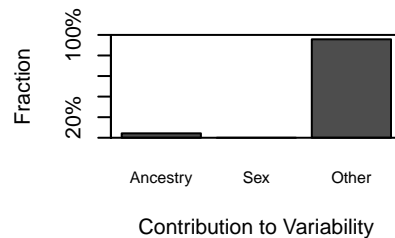

# Reserpine 131

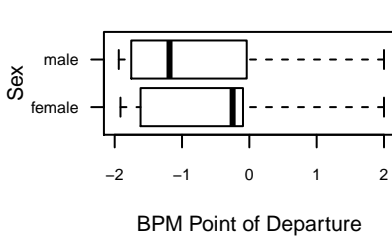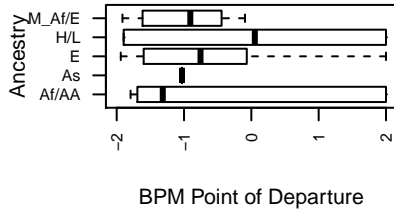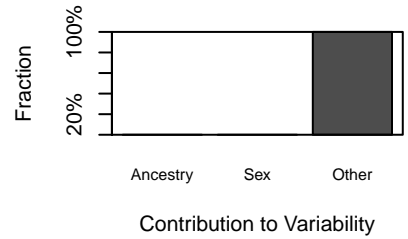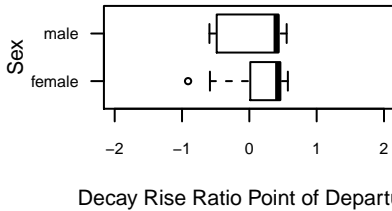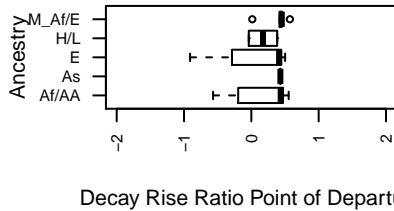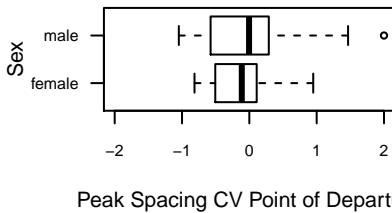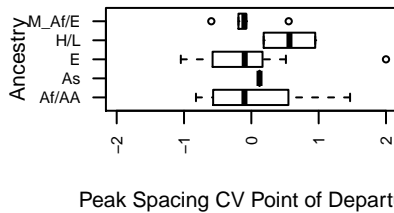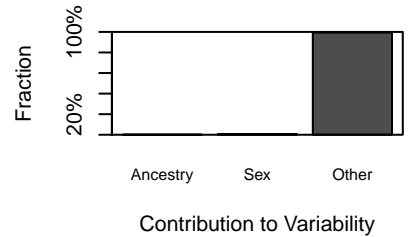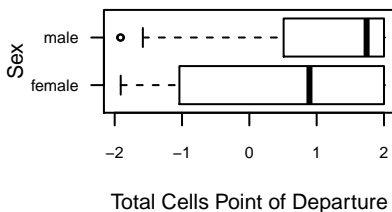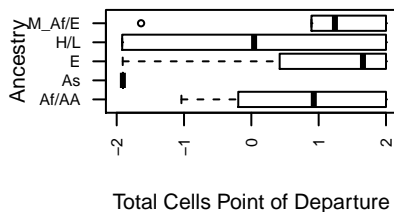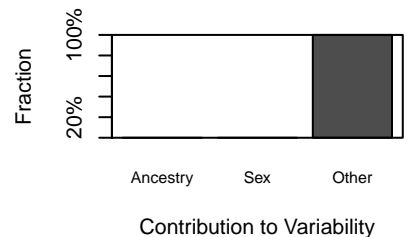

# Bisphenol\_A 132

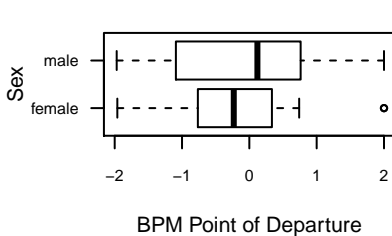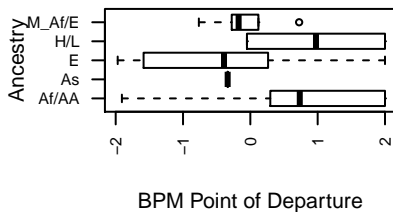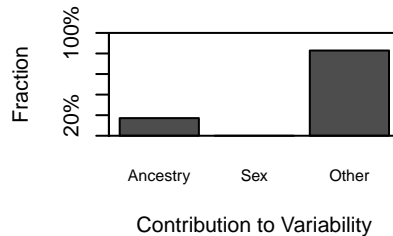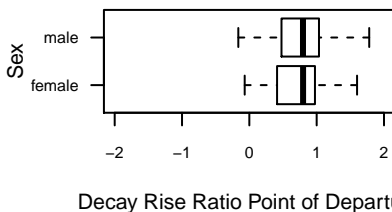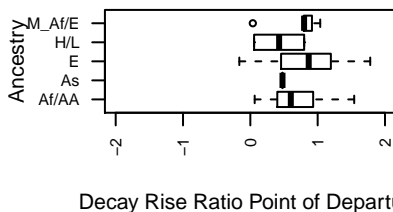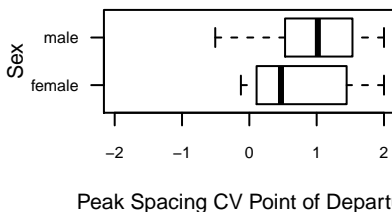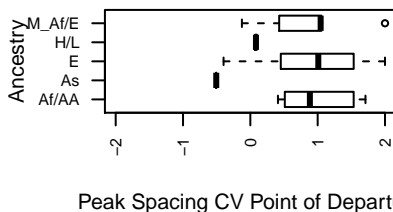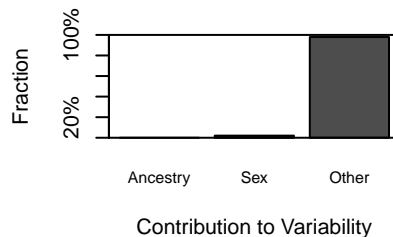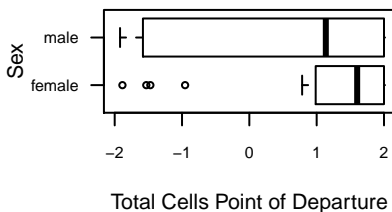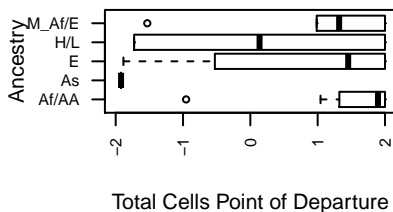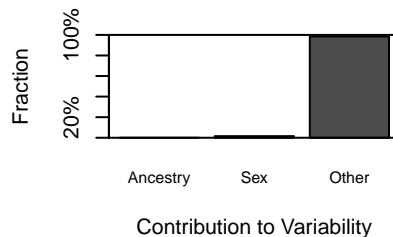

# Progesterone 133

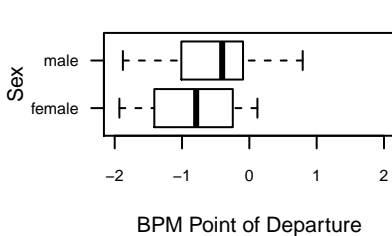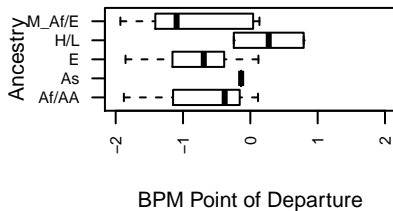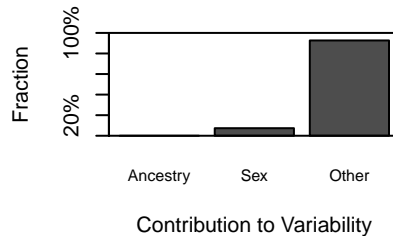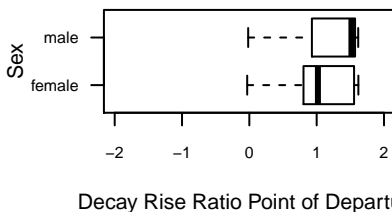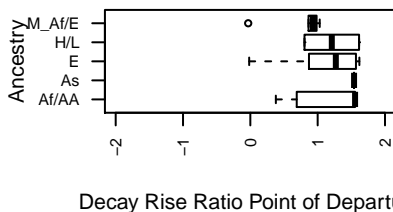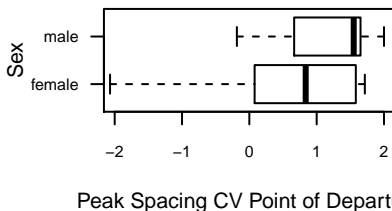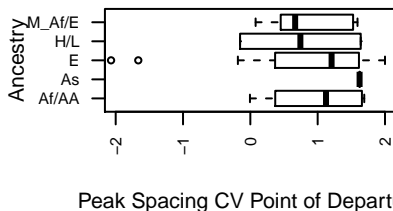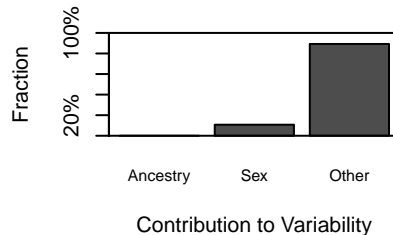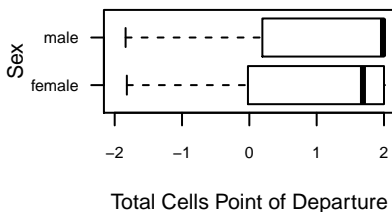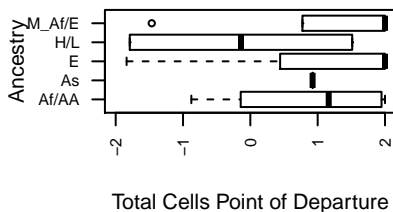

# Diethylstilbestrol 134

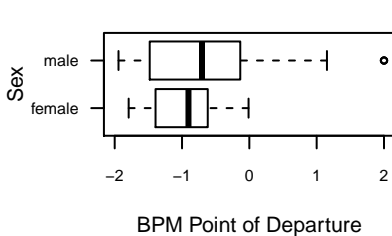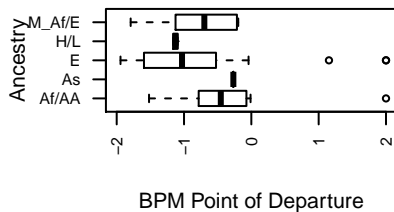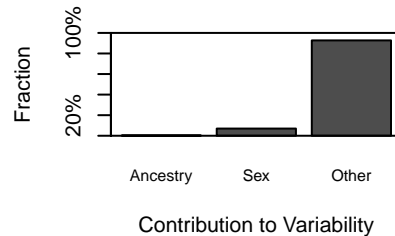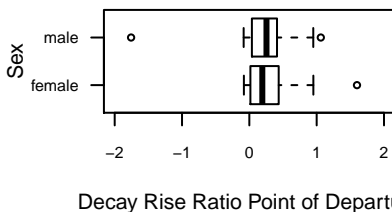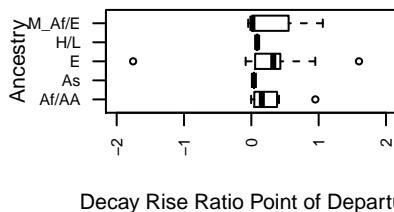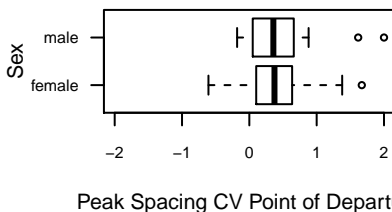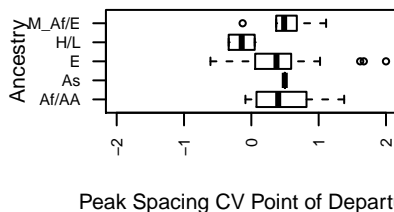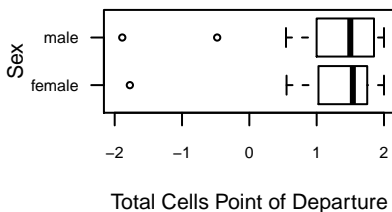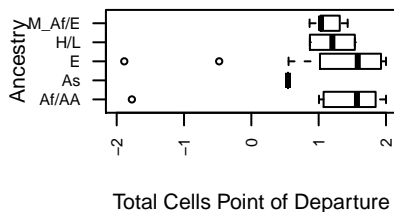

# Flutamide 135

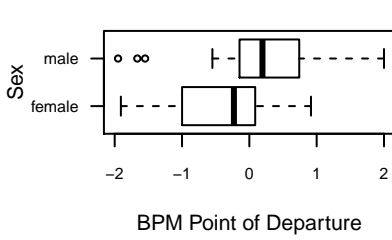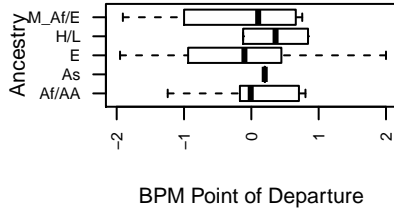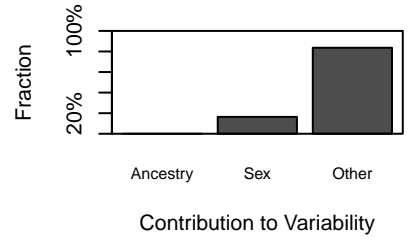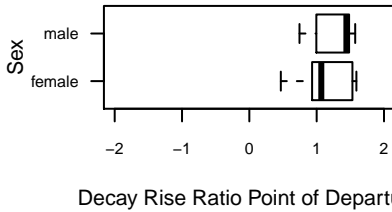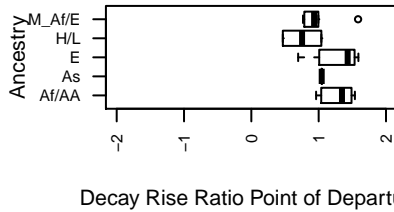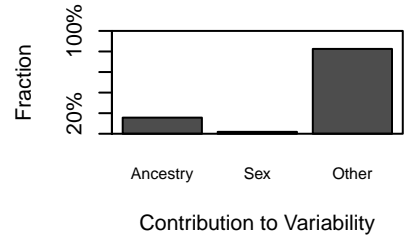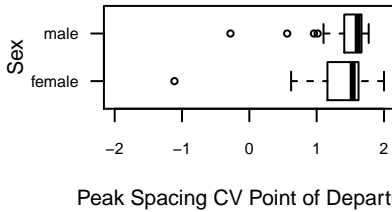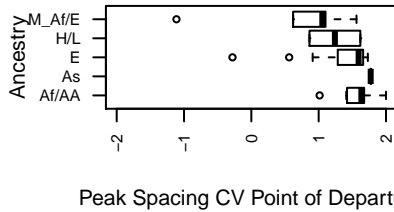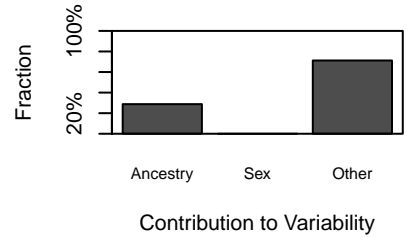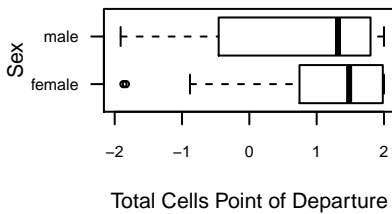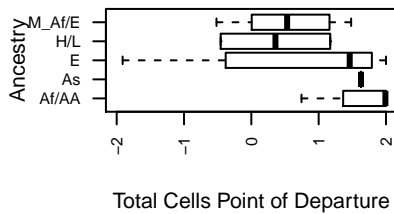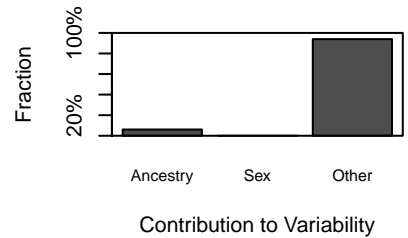



# Di(2-ethylhexyl)phthalate 136

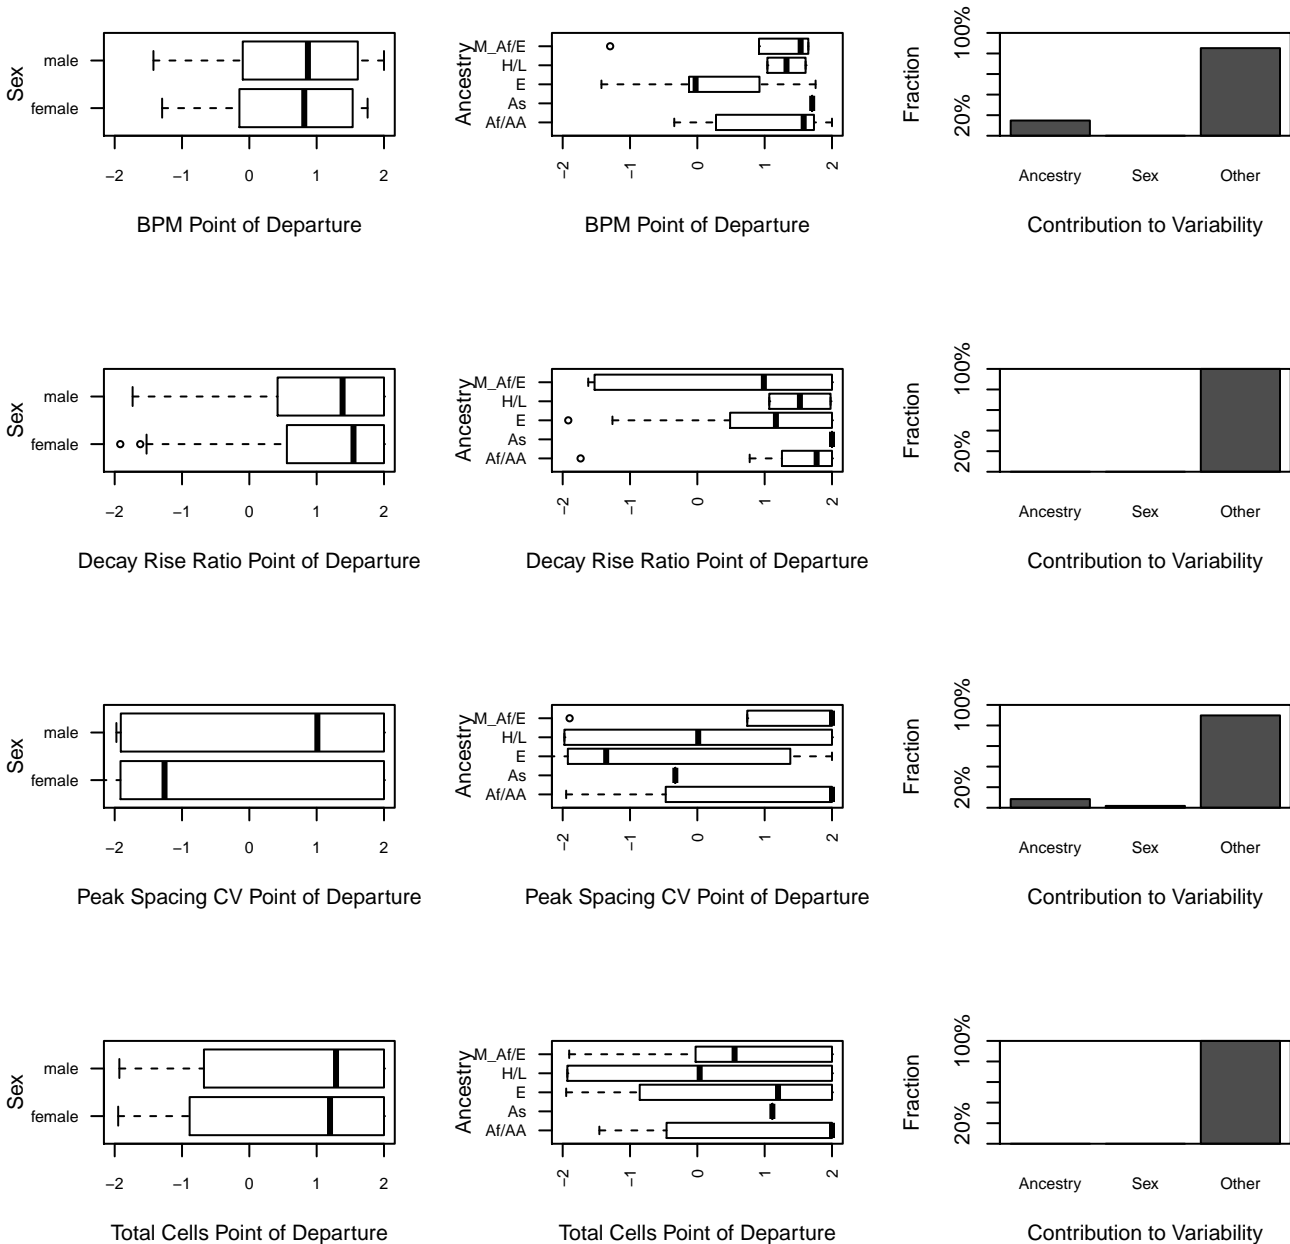

# Tamoxifen 137

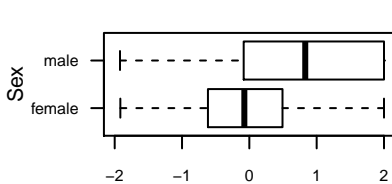

BPM Point of Departure

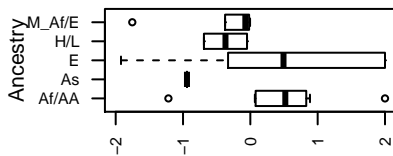

BPM Point of Departure

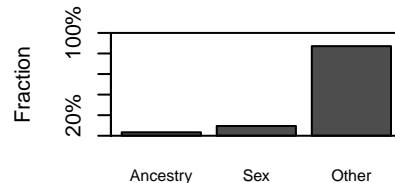

Contribution to Variability

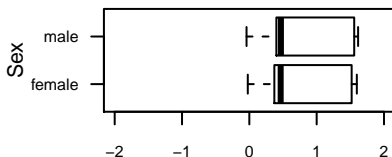

Decay Rise Ratio Point of Departure

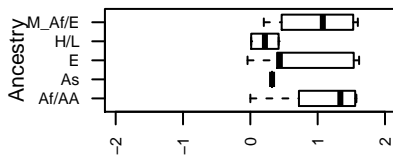

Decay Rise Ratio Point of Departure

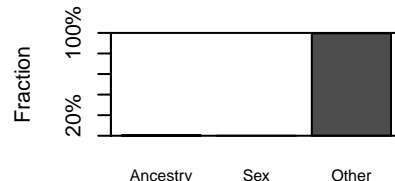

Contribution to Variability

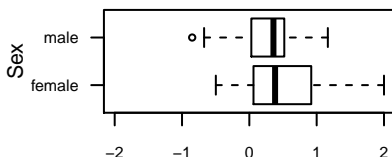

Peak Spacing CV Point of Departure

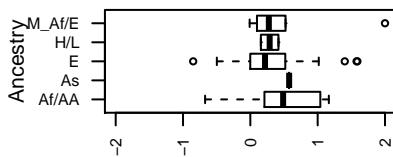

Peak Spacing CV Point of Departure



Contribution to Variability

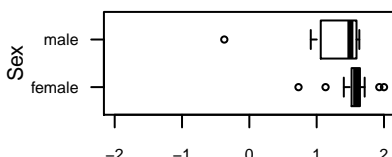

Total Cells Point of Departure

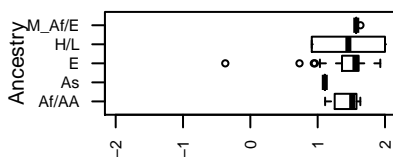

Total Cells Point of Departure

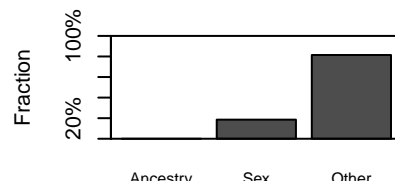

Contribution to Variability

# Phenobarbital\_sodium 138

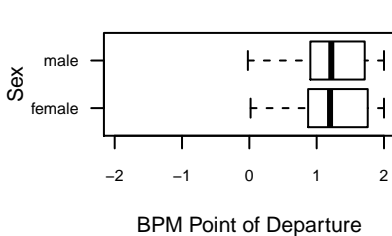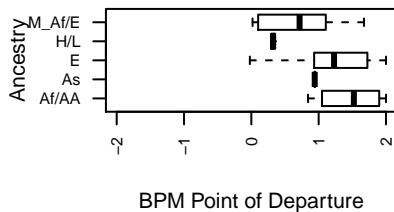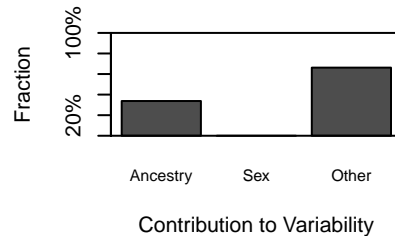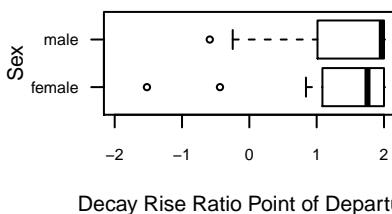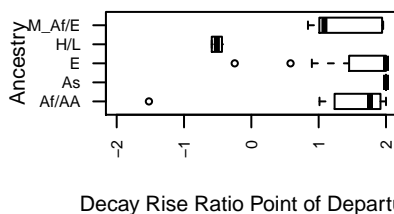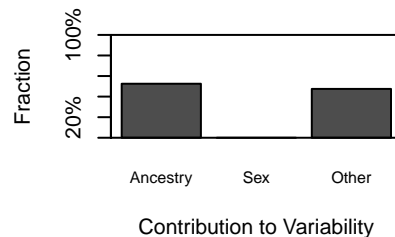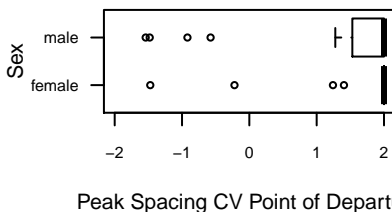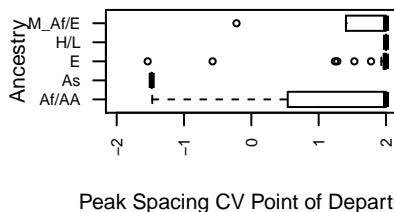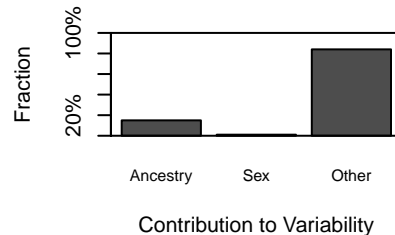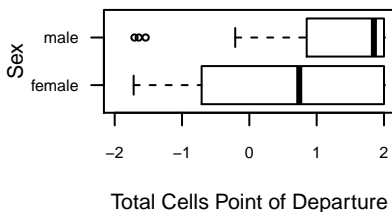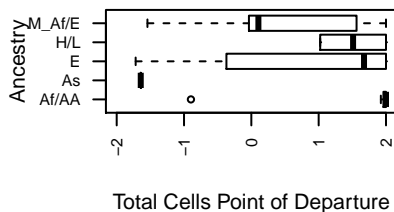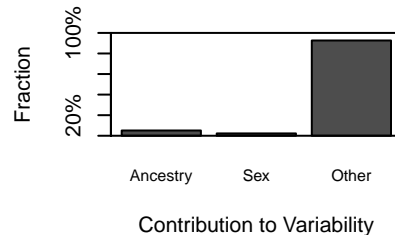

Supplement: NIHMS1538207-supplement-3.pdf [file NIHMS1538207-supplement-3.pdf]
