# Supplementary material
Source: PubMed Central journal article supplement (PMC6745256)

**Supplemental Figure 3. Inter-batch reproducibility represented by pairwise correlations across different batches for the standard donor (ID 1434).** Each scatter plot (lower left triangle of the matrix) shows the correlations between plates with the same plate design from different batches. In the upper right triangle of the matrix are the Pearson ( $r$ ) and Spearman ( $\rho$ ) correlation coefficients for each pairwise comparison.

# BPM

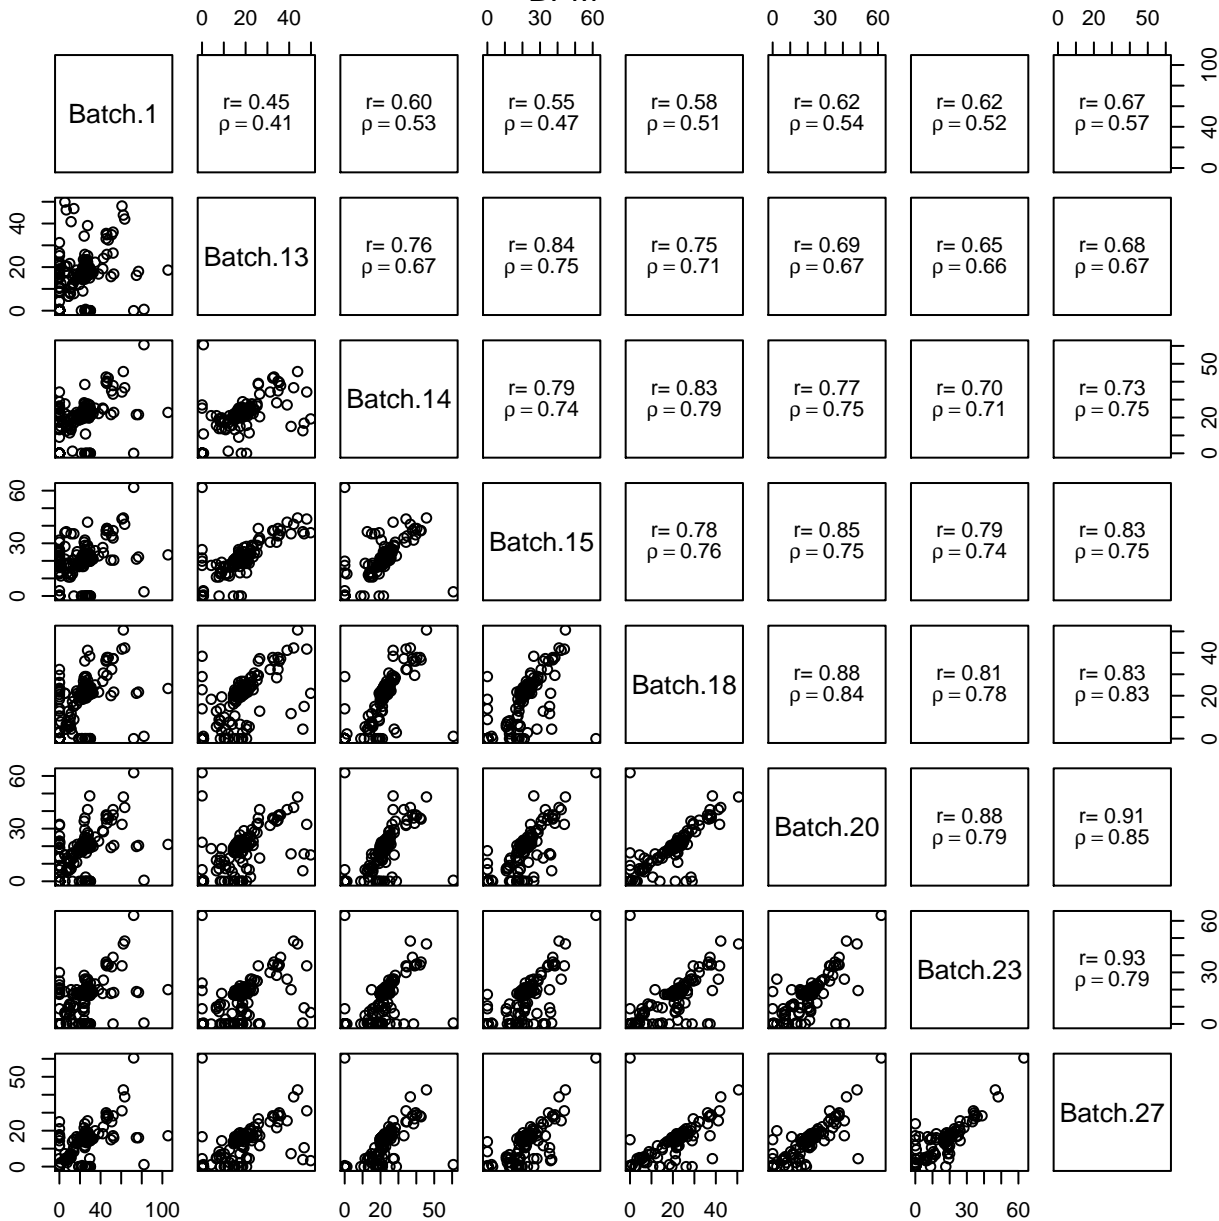

# decay.rise.ratio.avg

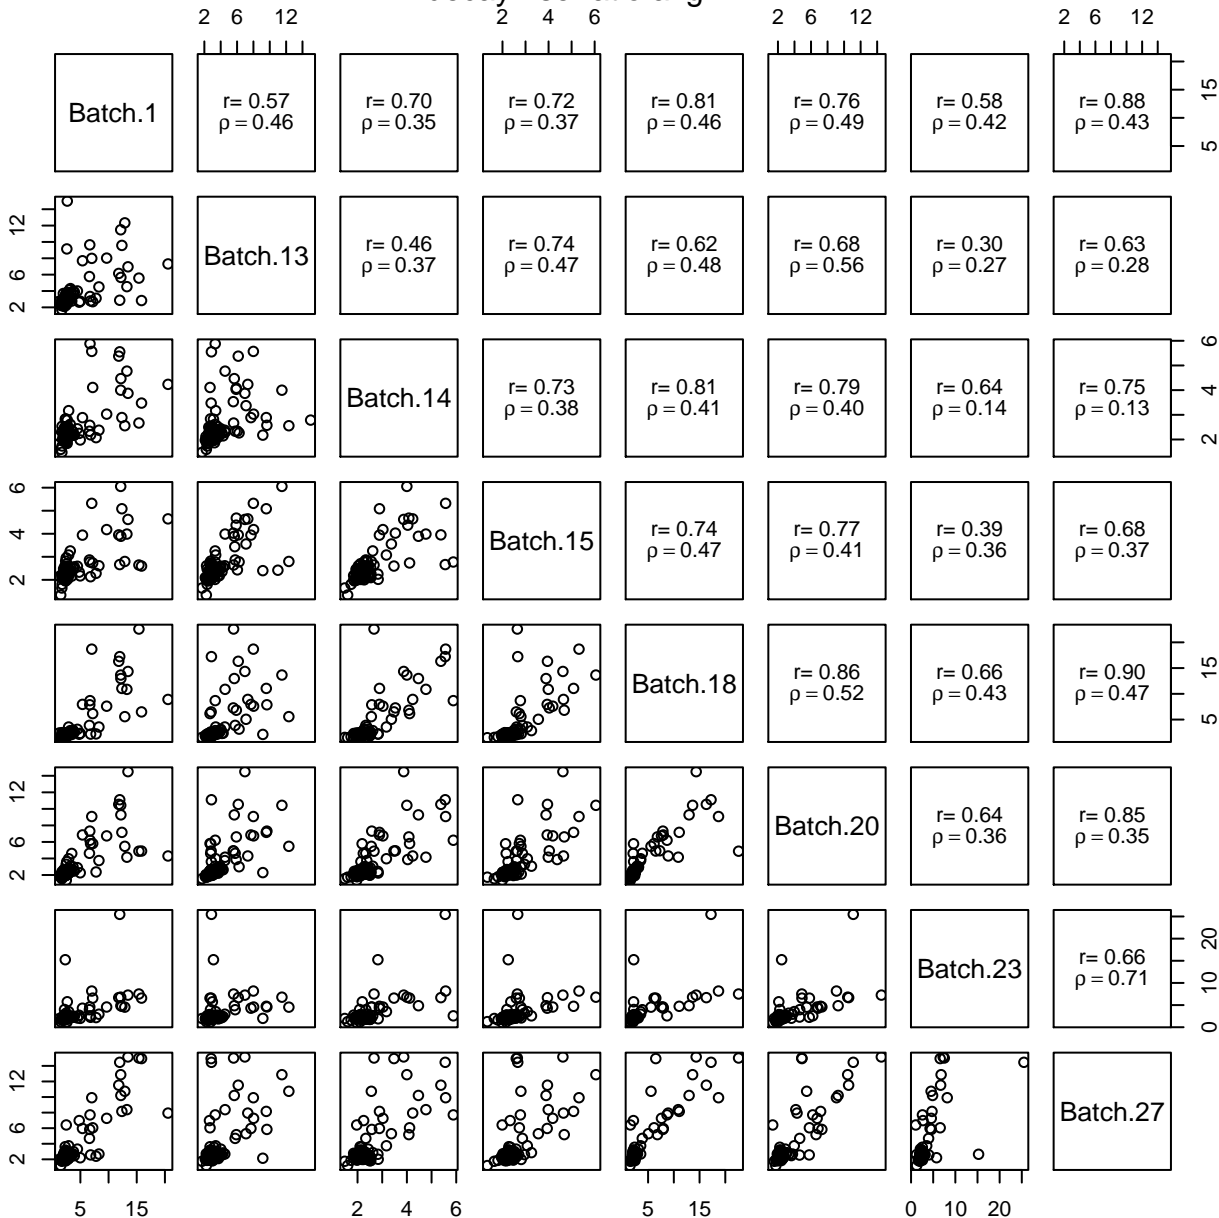

peak.spacing.cv

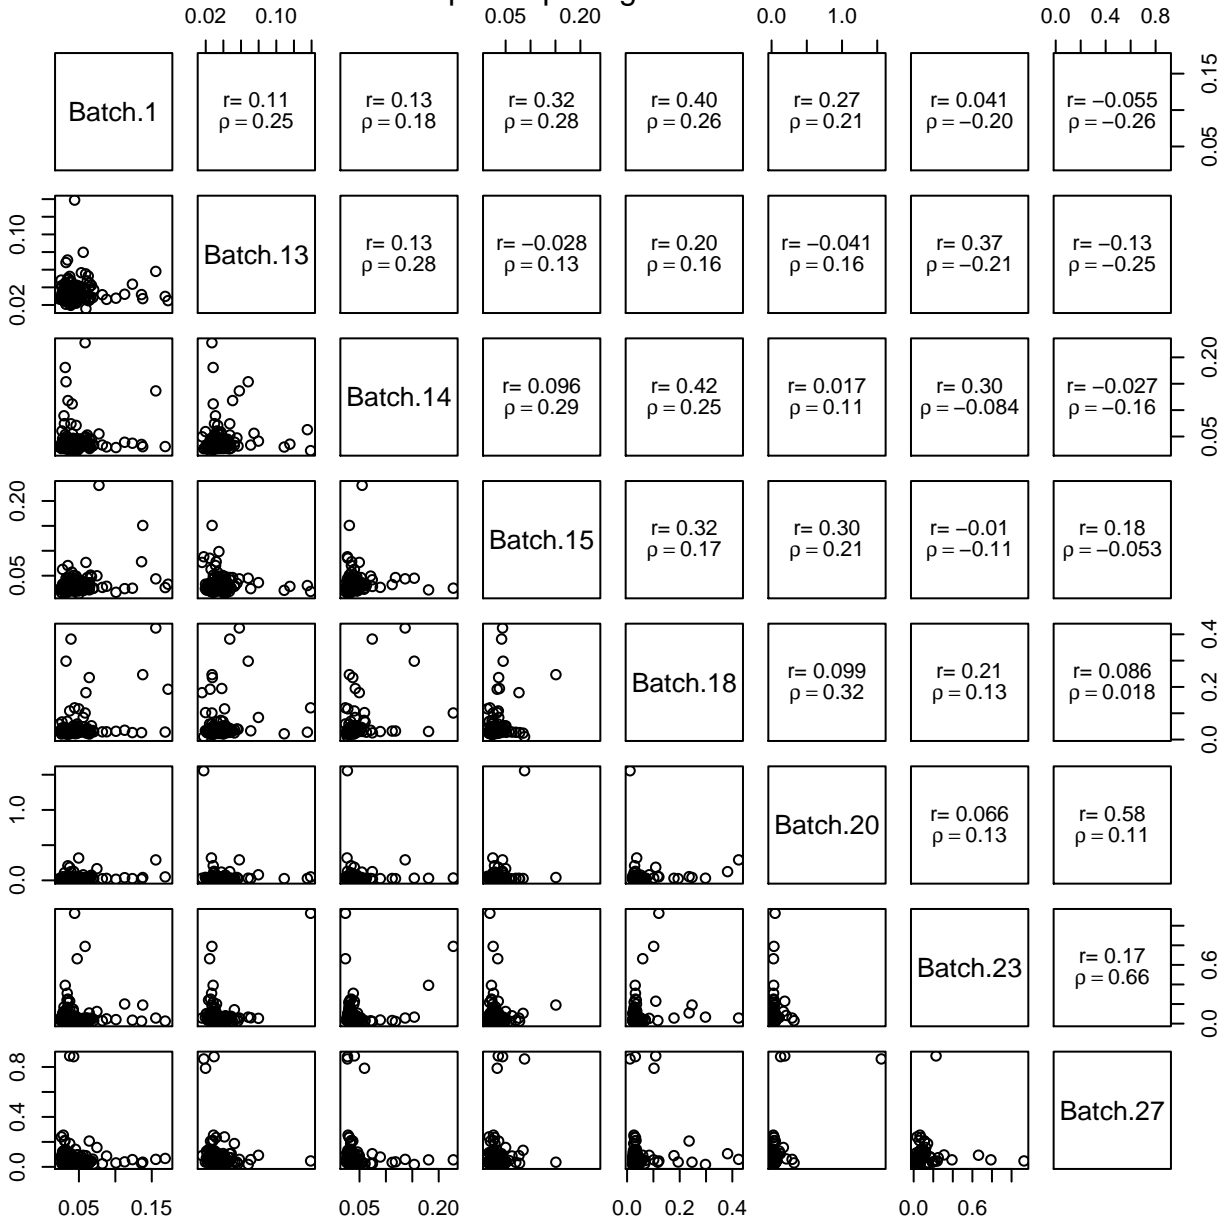

# Total.Cells

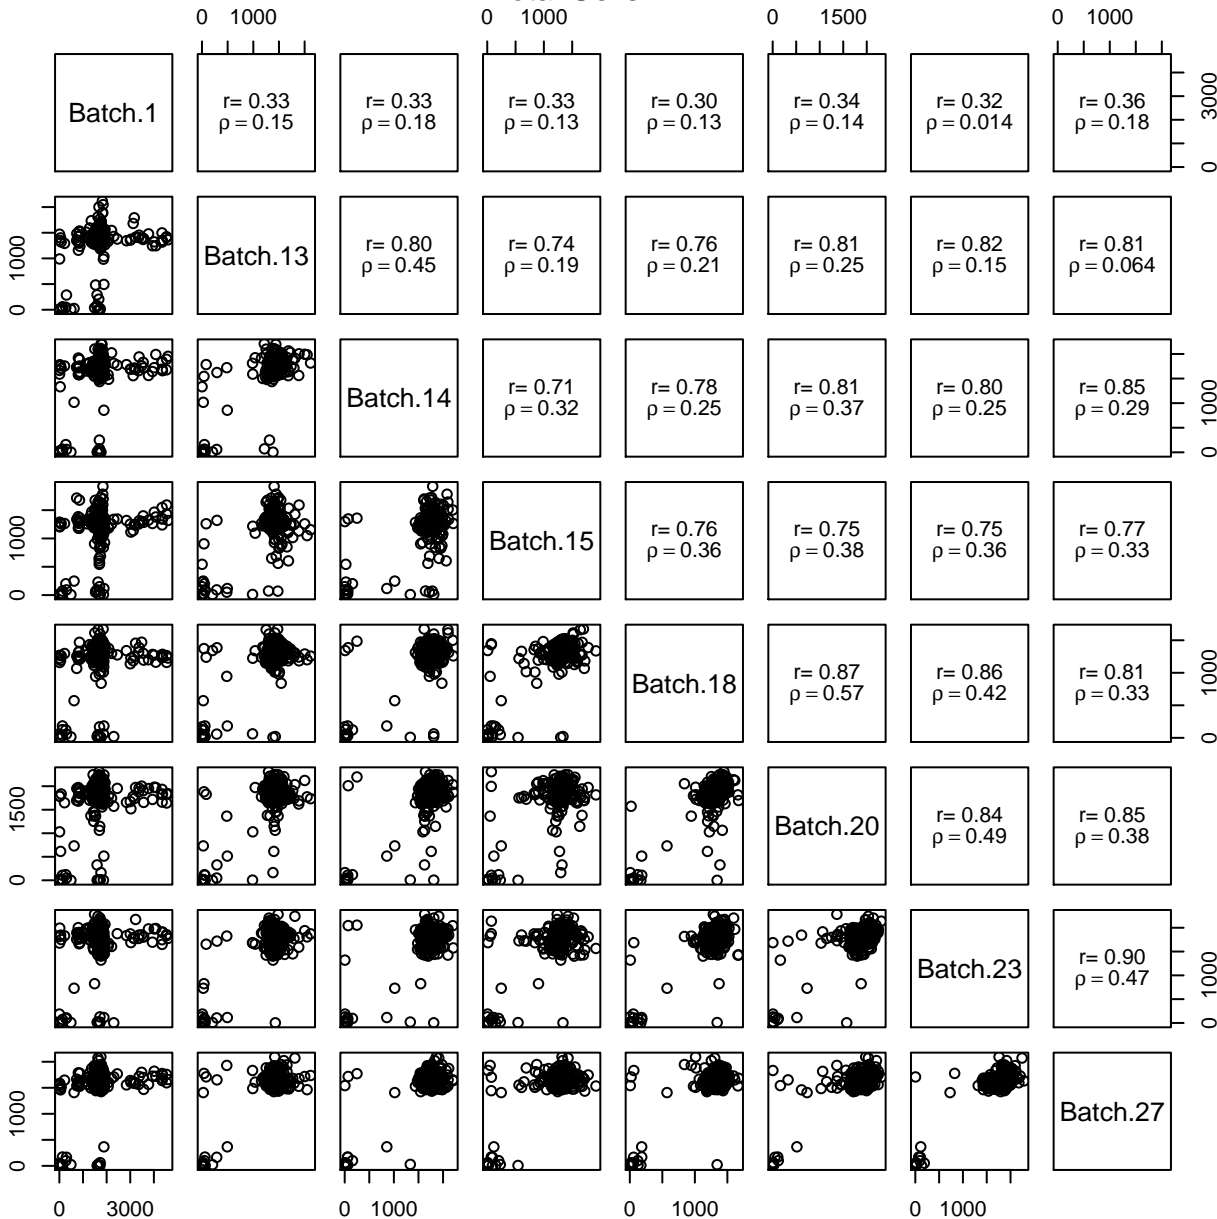

peak.amp.cv

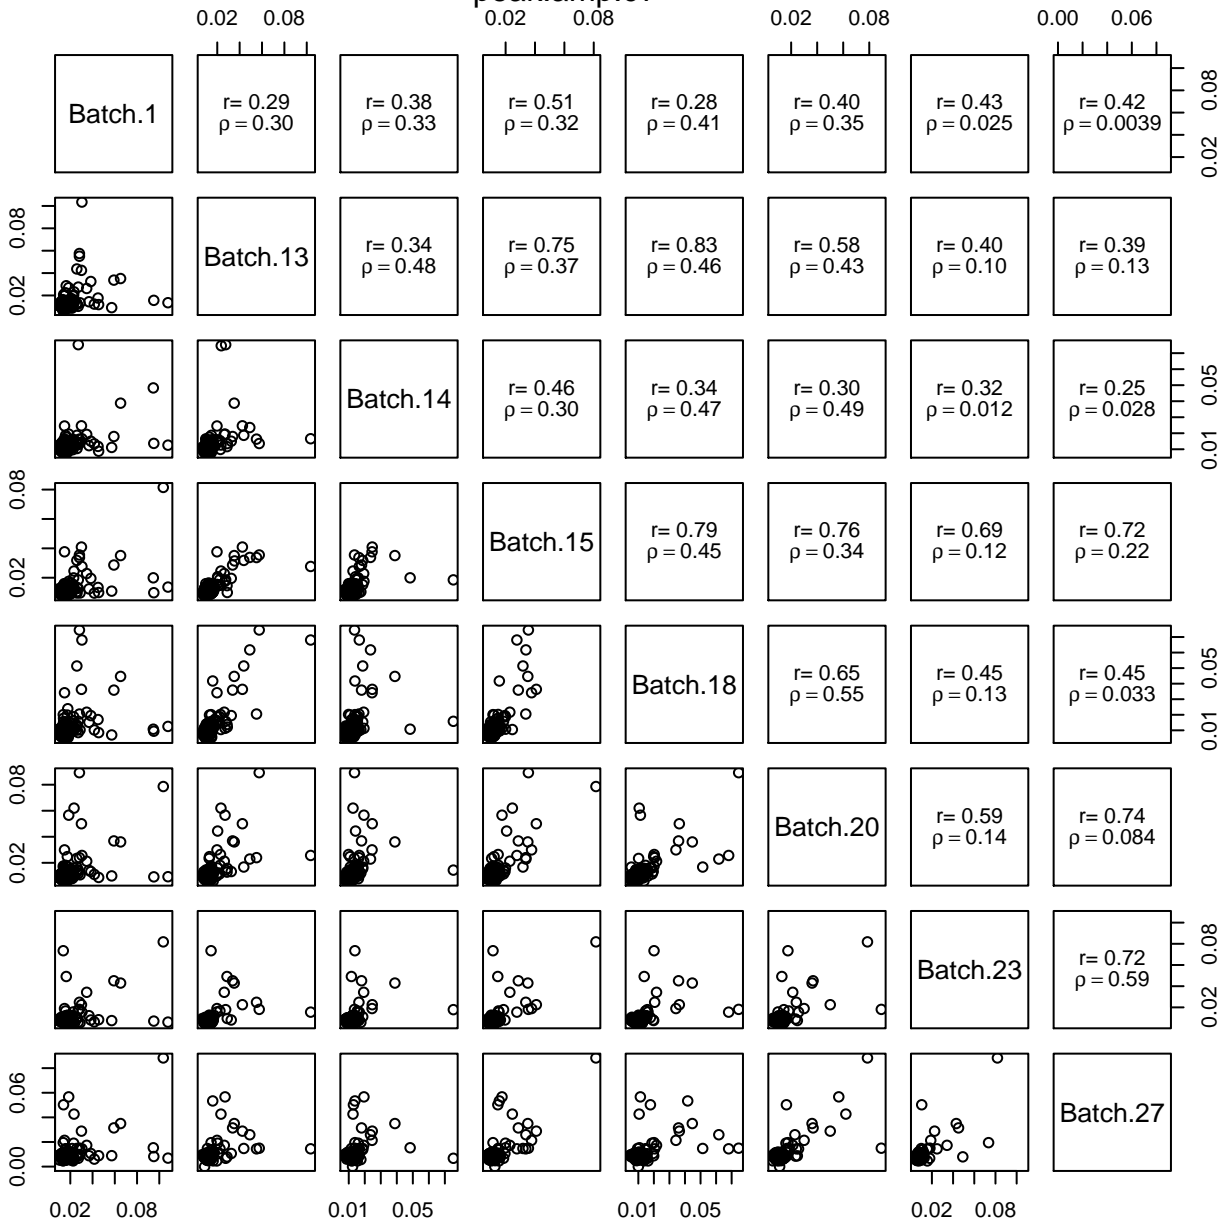

# All.Nuclei.Mean.Integr.Itensity

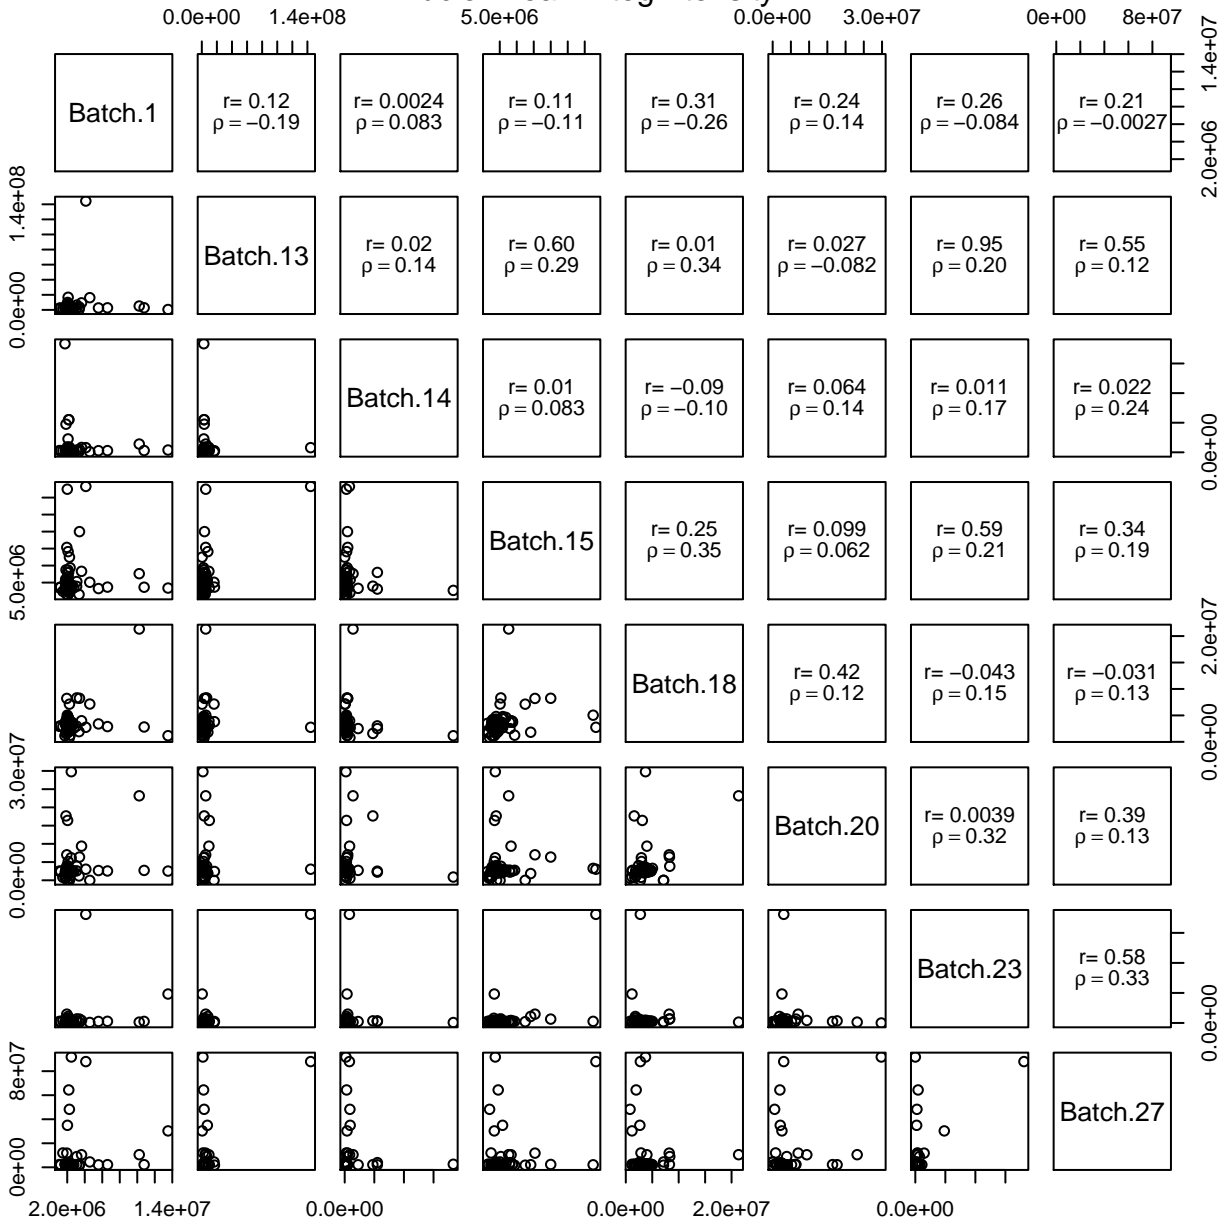

# Positive.W2.Mean.Stain.Area

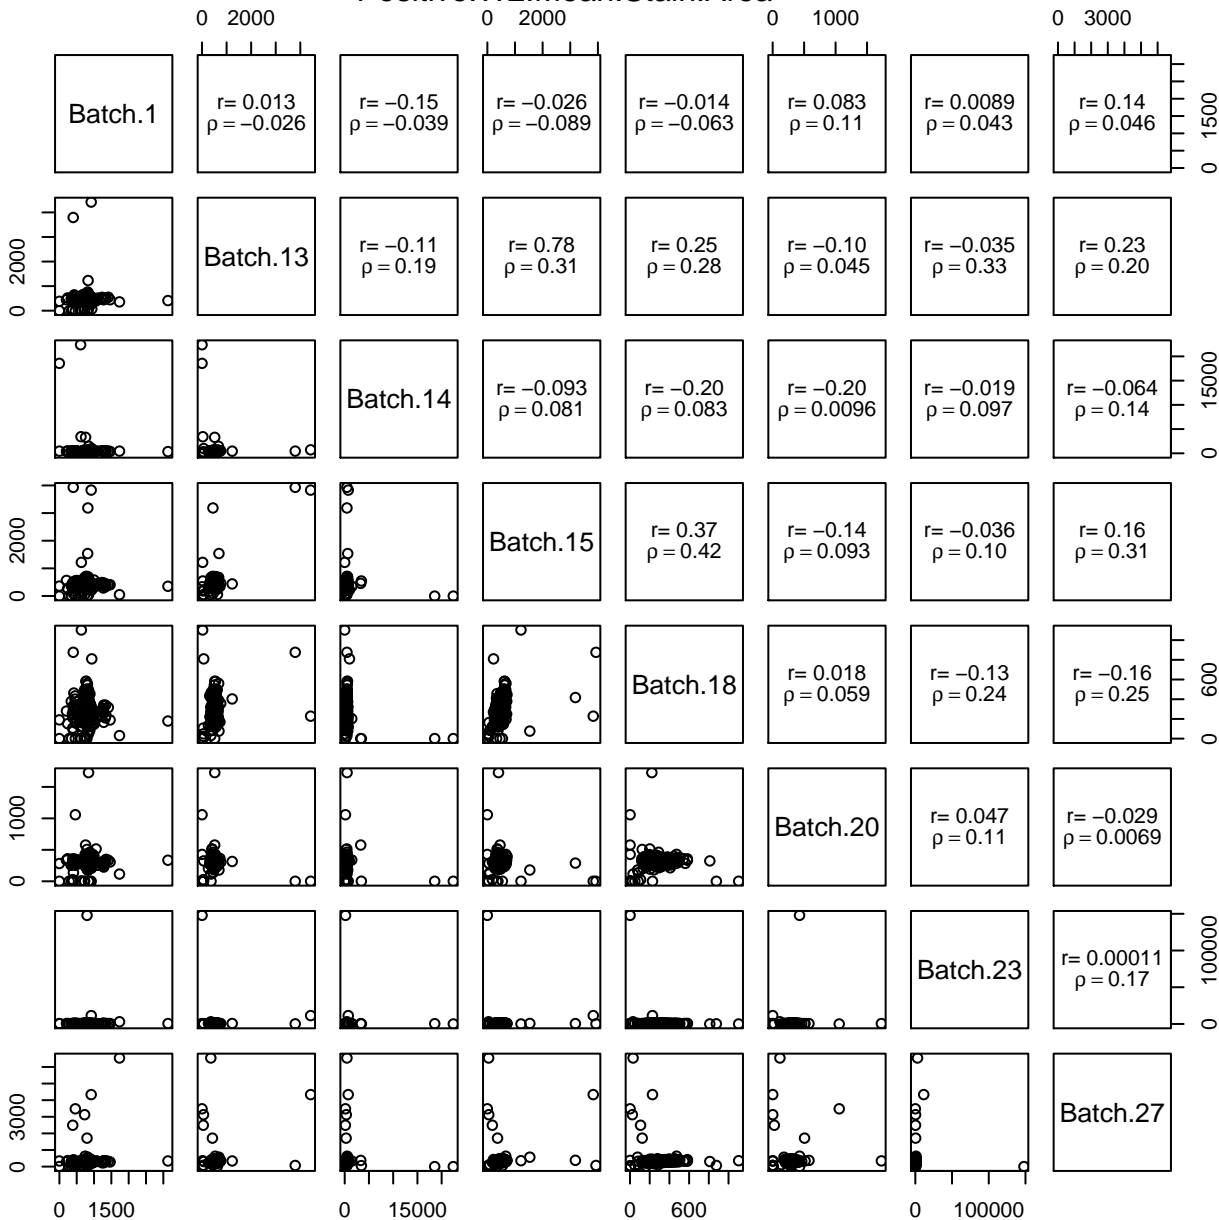





# Cell.Positive.W2.Mean.Stain.Area

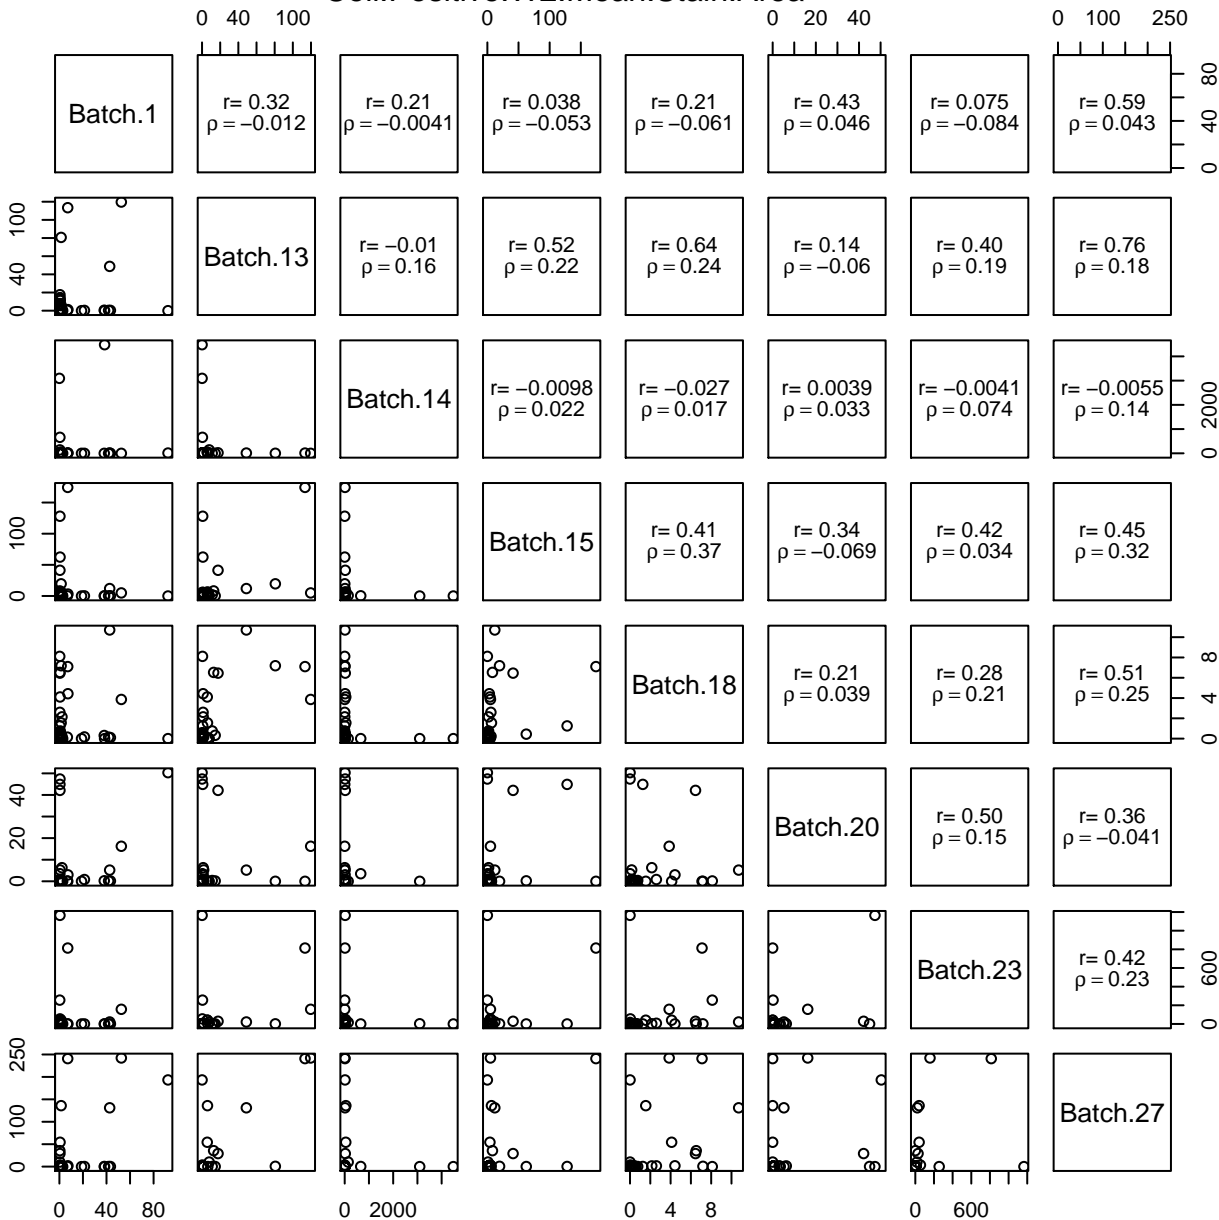

Supplement: NIHMS1538207-supplement-1.pdf [file NIHMS1538207-supplement-1.pdf]
