# Supplementary material
Source: PubMed Central journal article supplement (PMC6745256)

**Supplemental Figure 4. iPSC-derived cardiomyocytes exhibit inter-individual variability in baseline beating parameters, largely driven by biological (donor) contribution.** Left: Boxplots showing baseline values for the phenotypes (bottom to top) of peak amplitude coefficient of variation (CV); all nuclei mean integrated intensity; positive W2 mean stain area; positive W2 mean stain integrated intensity; and positive W2 mean stain area per cell. Boxplots for each donor are comprised of the median, interquartile range (IQR), and 95% confidence interval (CI) values. Middle: Boxplots showing the distribution of the coefficient of variation for total and donor contributions to the total variability of each phenotype, based on robust linear mixed effects modeling. Total contribution accounts for technical and biological sources of variability, whereas donor variability accounts only for biological variability. Right: Histograms showing the fraction of technical (batch, plate, vehicle, other) and biological (donor) contributions to the total variability of each phenotype, based on robust linear mixed effects modeling. Sources of variability considered account for batch (screening batch dates) effects, plate (inter-plate) effects, vehicle (0.5% DMSO vehicle vs. cell culture media) effects, donor (biological) effects, and other residual contributions.

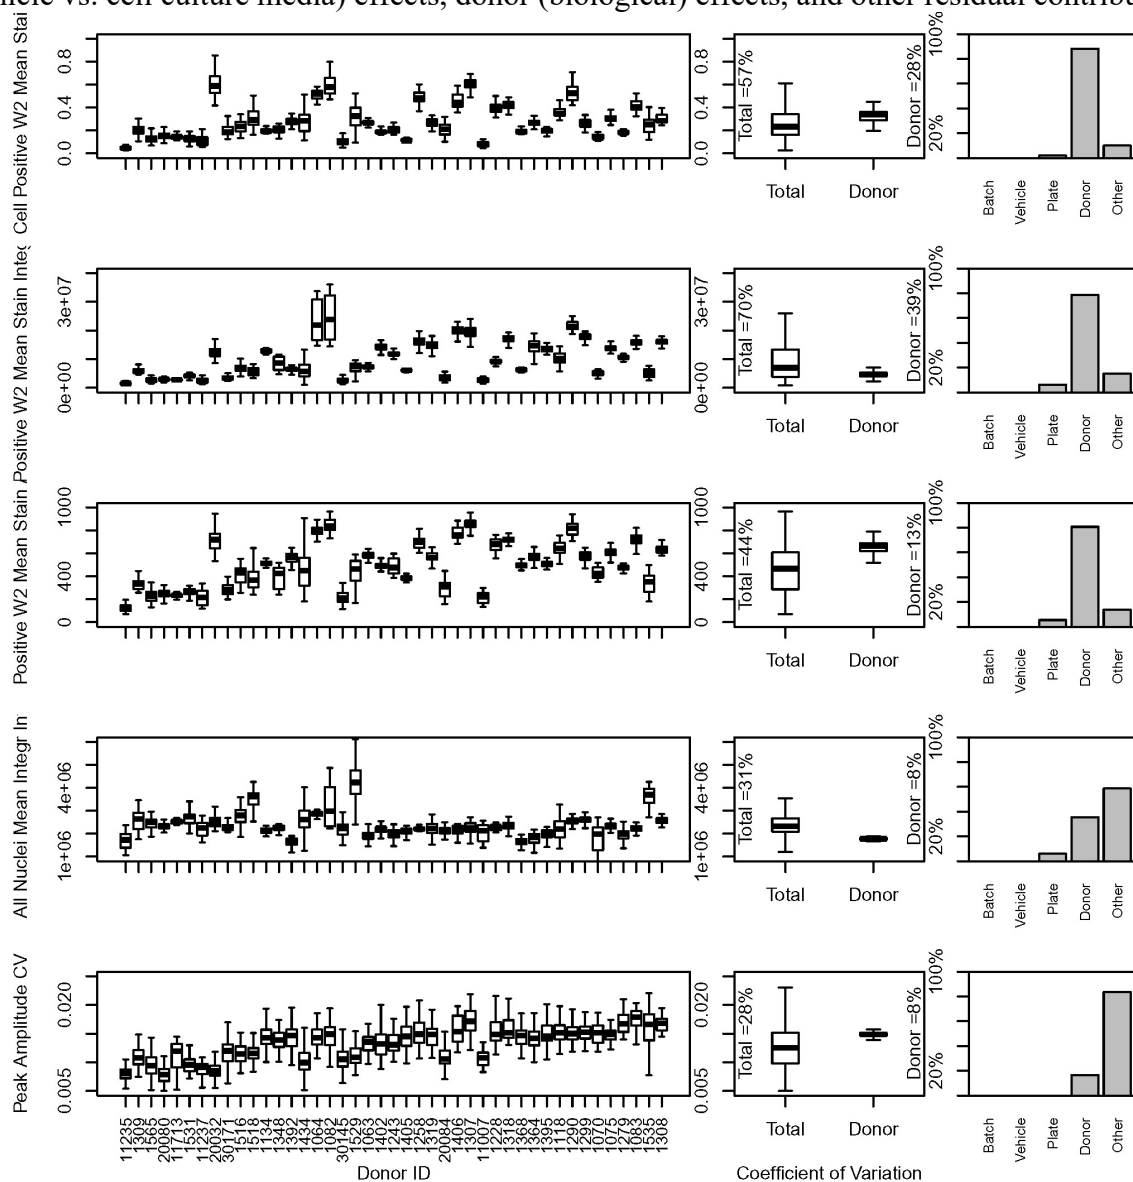

Supplement: NIHMS1538207-supplement-2.pdf [file NIHMS1538207-supplement-2.pdf]
