# Supplementary material
Source: PubMed Central journal article supplement (PMC6745256)

**Supplemental Figure 2. Correlations among phenotypes chosen for analysis.** Each scatter plot (lower left triangle of the matrix) shows the correlations between phenotypes. In the upper right triangle of the matrix are the Pearson ( $r$ ) and Spearman ( $\rho$ ) correlation coefficients for each pairwise comparison. Most correlations are small ( $r < 0.5$ ), and those with larger correlations show distinct “clusters” or non-linearities, suggesting that the phenotypes are not redundant.

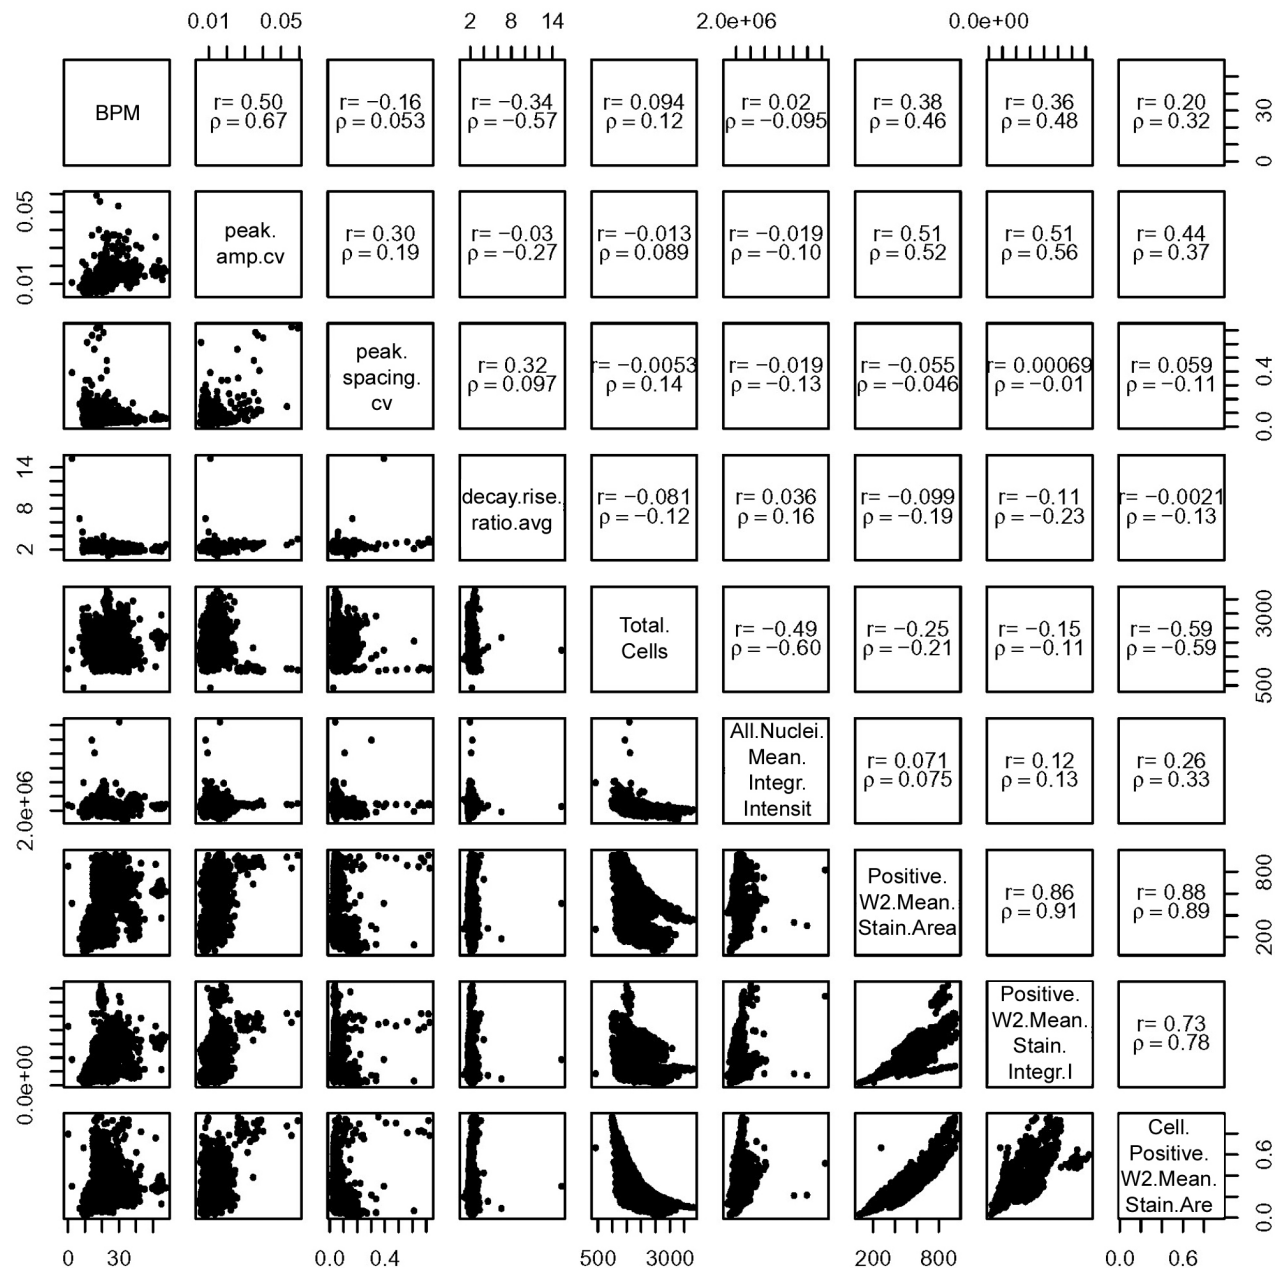

Supplement: NIHMS1538207-supplement-6.pdf [file NIHMS1538207-supplement-6.pdf]
