# Supplementary material
Source: PubMed Central journal article supplement (PMC6745256)

**Supplemental Figure 7.** Chemical-specific variability in efficacy and degree of population variability for (A) beats per minute; (B) decay/rise ratio; (C) peak spacing CV; and (D) total cells. Box plots show median and interquartile range of the magnitude of effect (difference between maximal response and control response) values across 43 donors, sorted within chemical class. Chemical names are along with left axis, and different colored boxes represent chemical classes.

A

Chemical Name

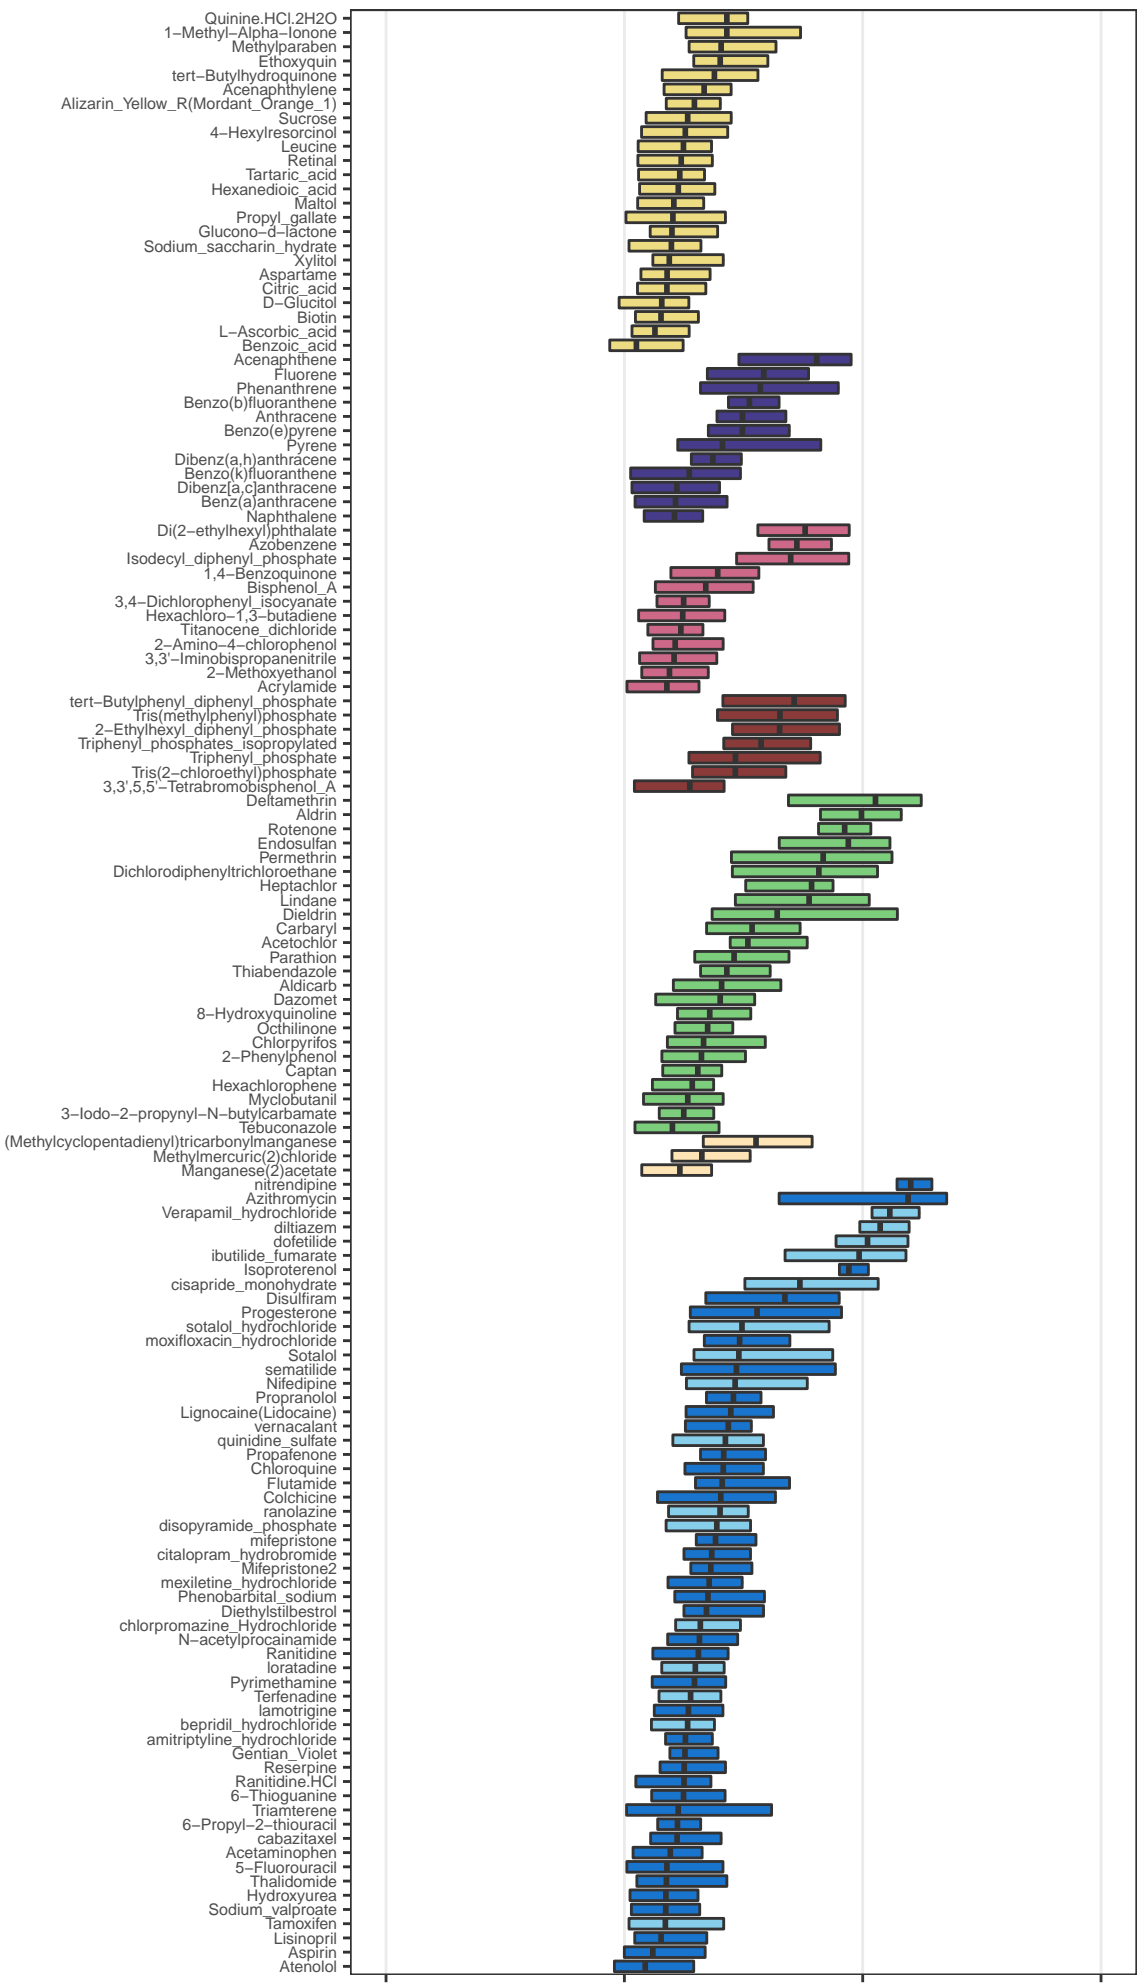

Chemical Class

- Flame.Retardant
- Food.Additive
- Industrial.Chemical
- Metal
- PAH
- Pesticide
- Pharmaceutical
- Pharmaceutical.cIPA

Magnitude of Effect Beats per Minute

B

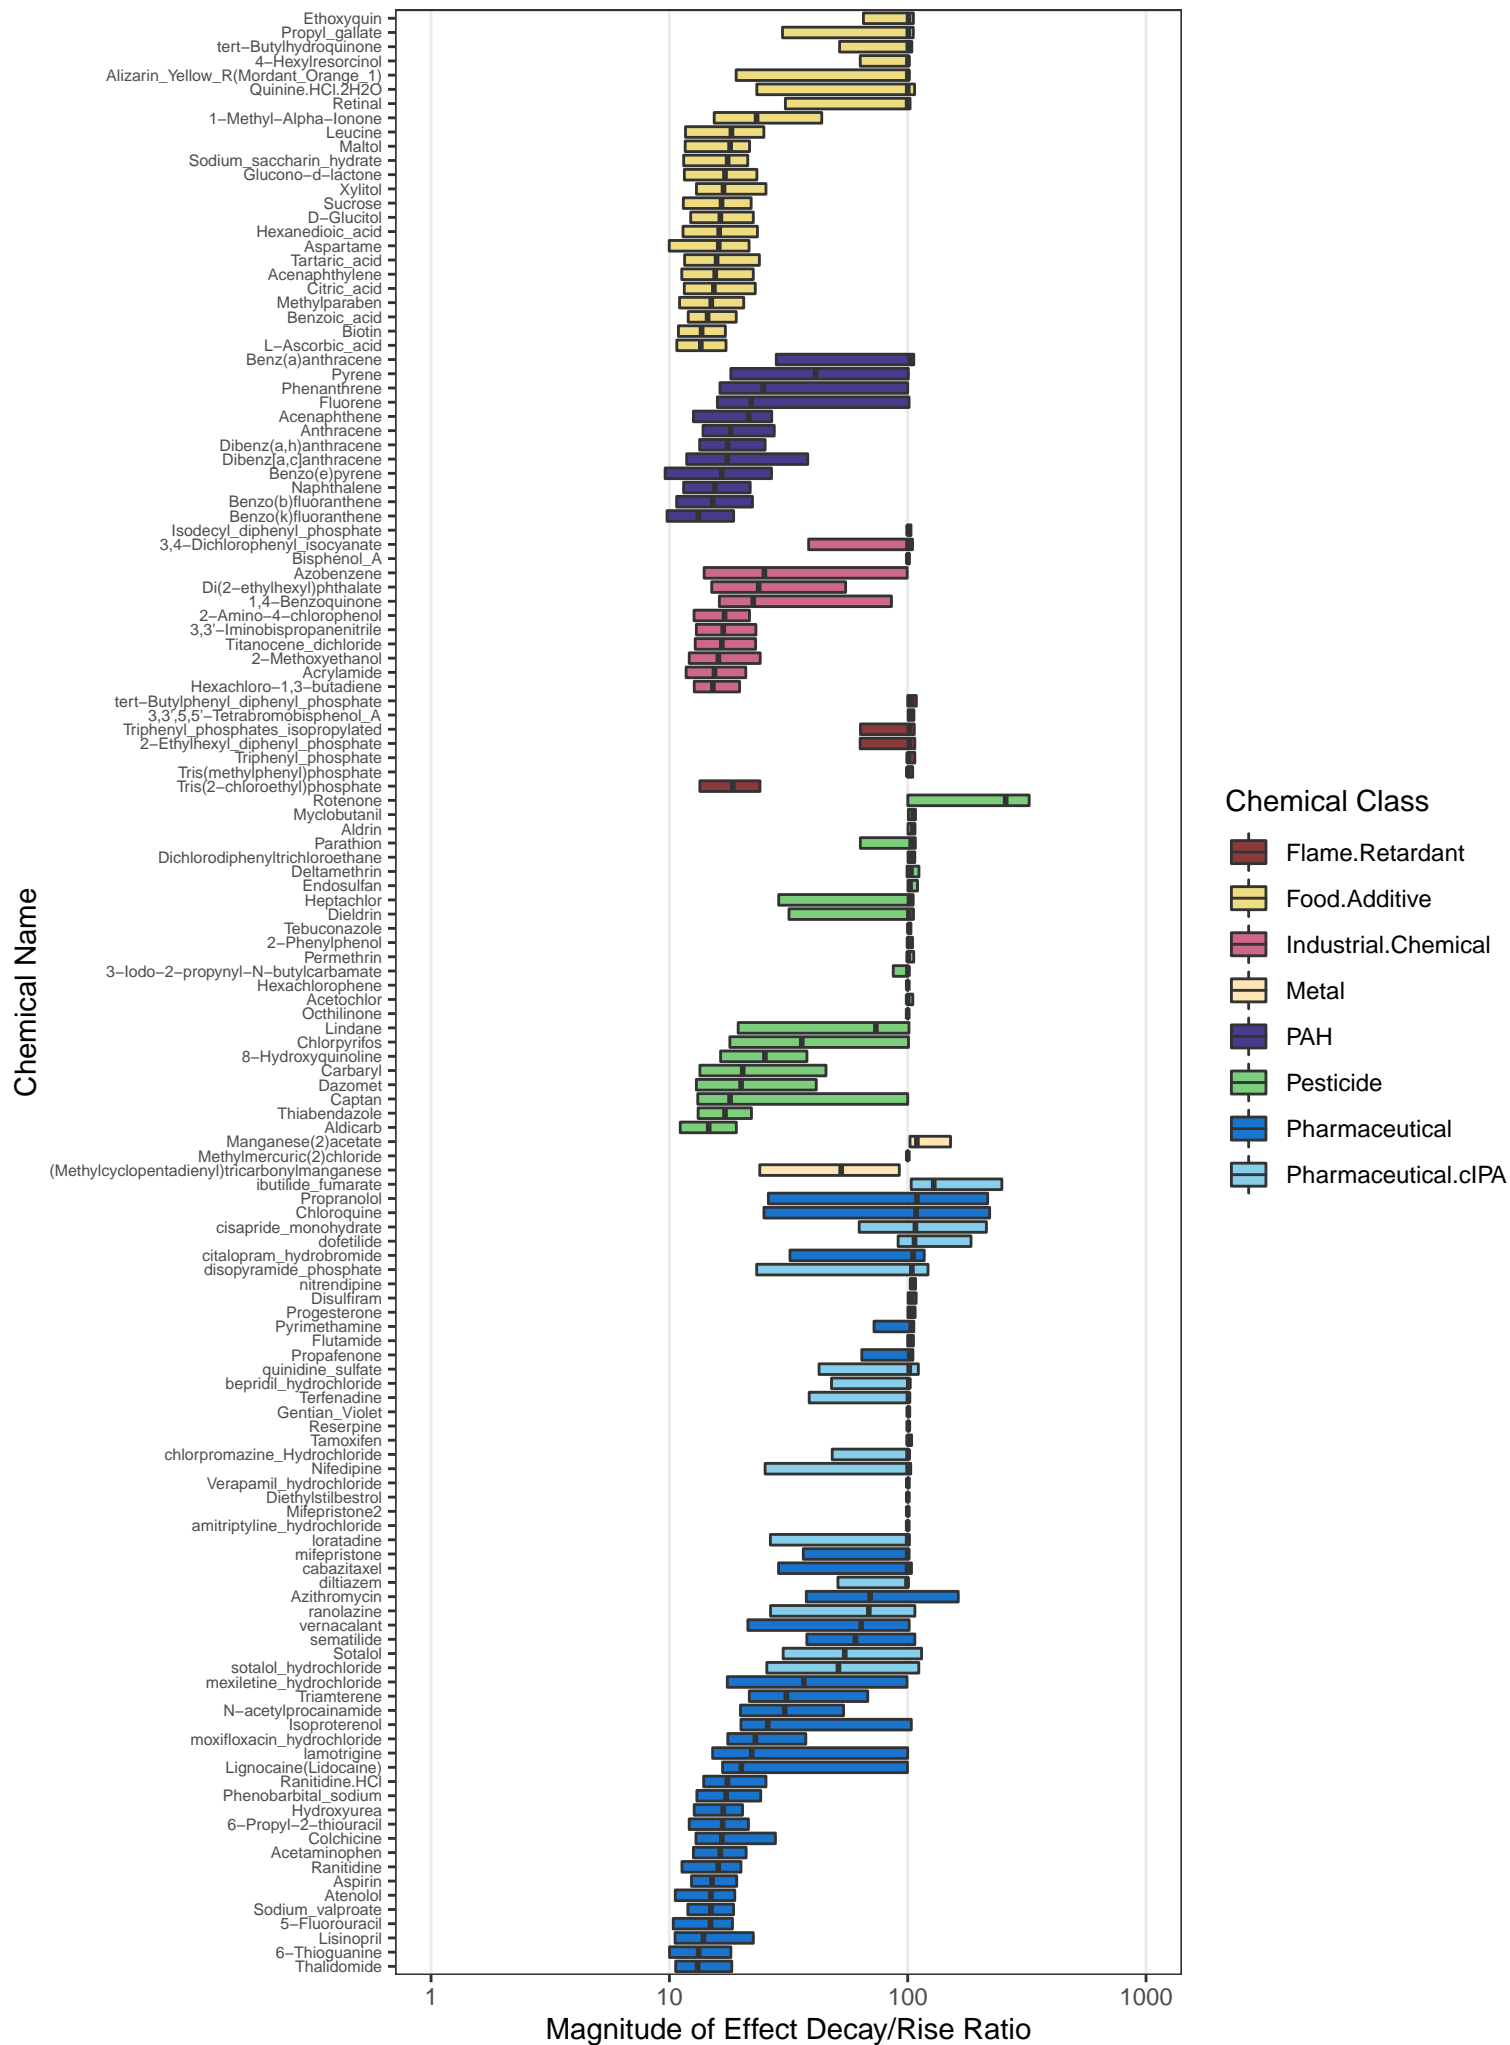

C

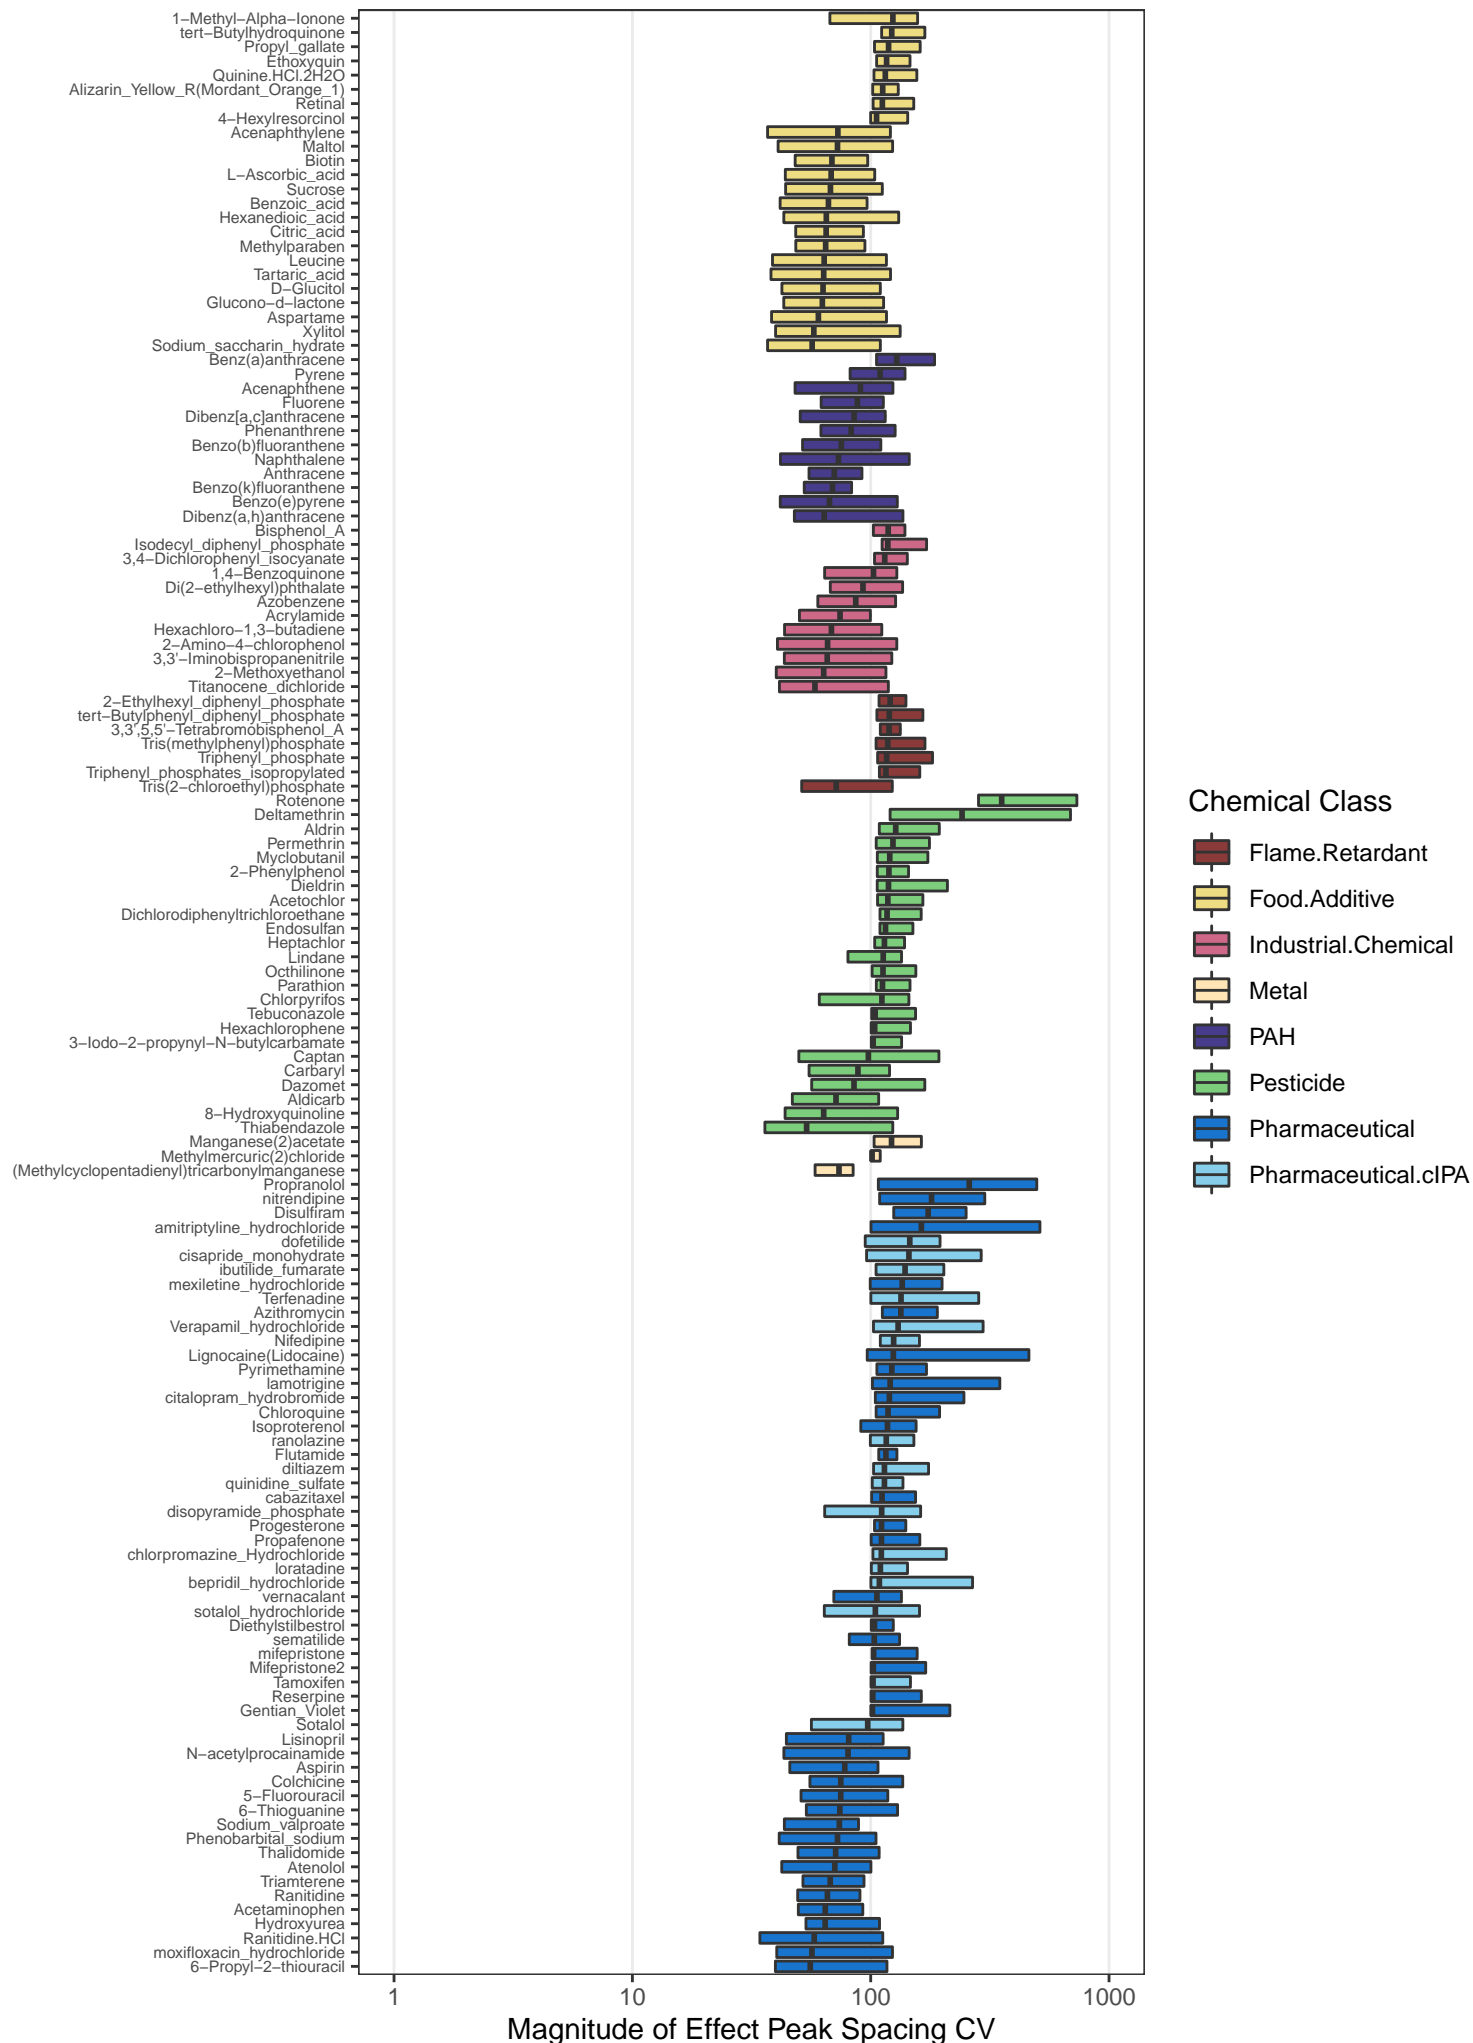

D

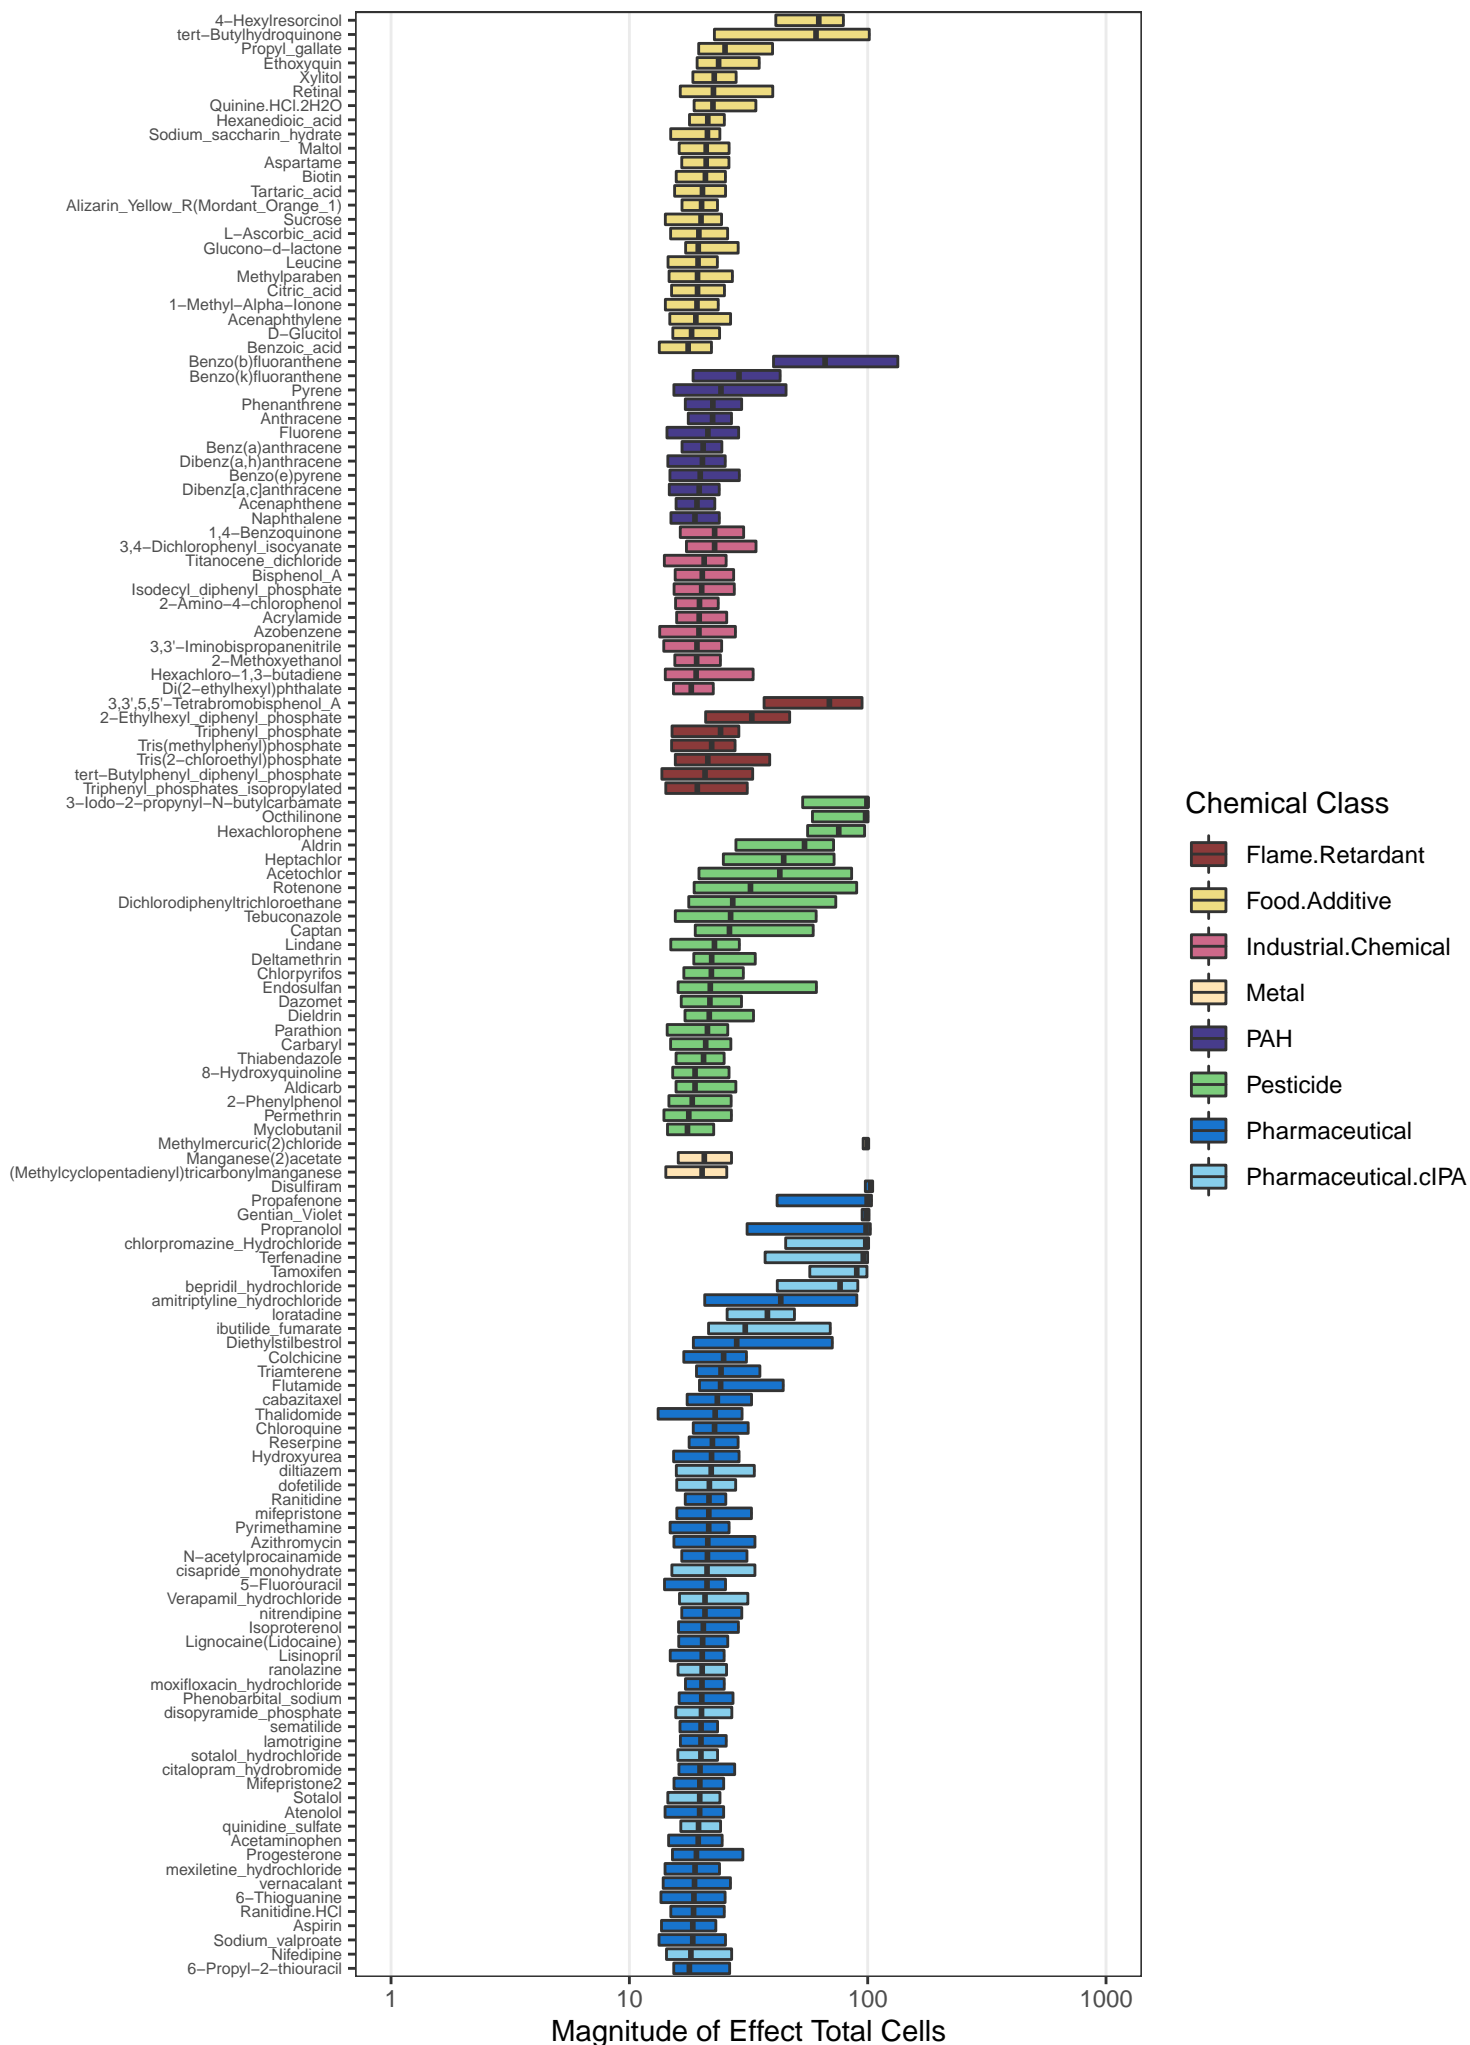

Supplement: NIHMS1538207-supplement-8.pdf [file NIHMS1538207-supplement-8.pdf]
