# Supplementary material
Source: PubMed Central journal article supplement (PMC6745256)

**Supplemental Figure 8.** Scatter plots comparing chemical- and donor-specific points of departure and magnitude of effect for (A) beats per minute; (B) decay/rise ratio; (C) peak spacing CV; and (D) total cells. Each point represents a single donor and chemical. Both the Pearson  $r$  and Spearman  $\rho$  correlations are also shown.

A

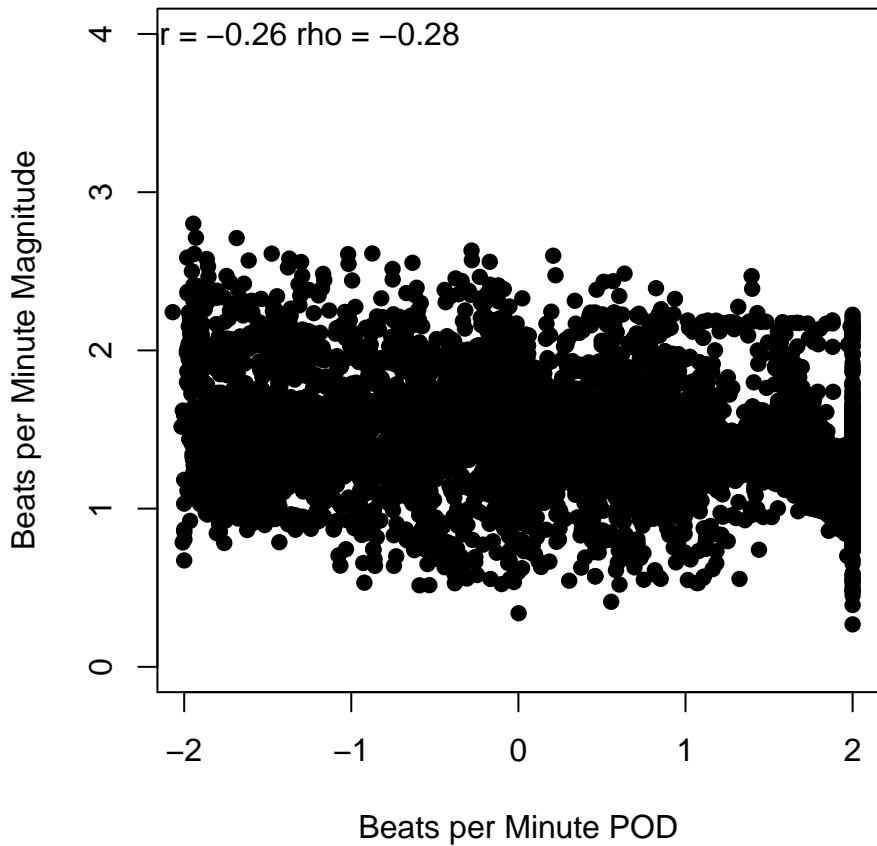

**B**

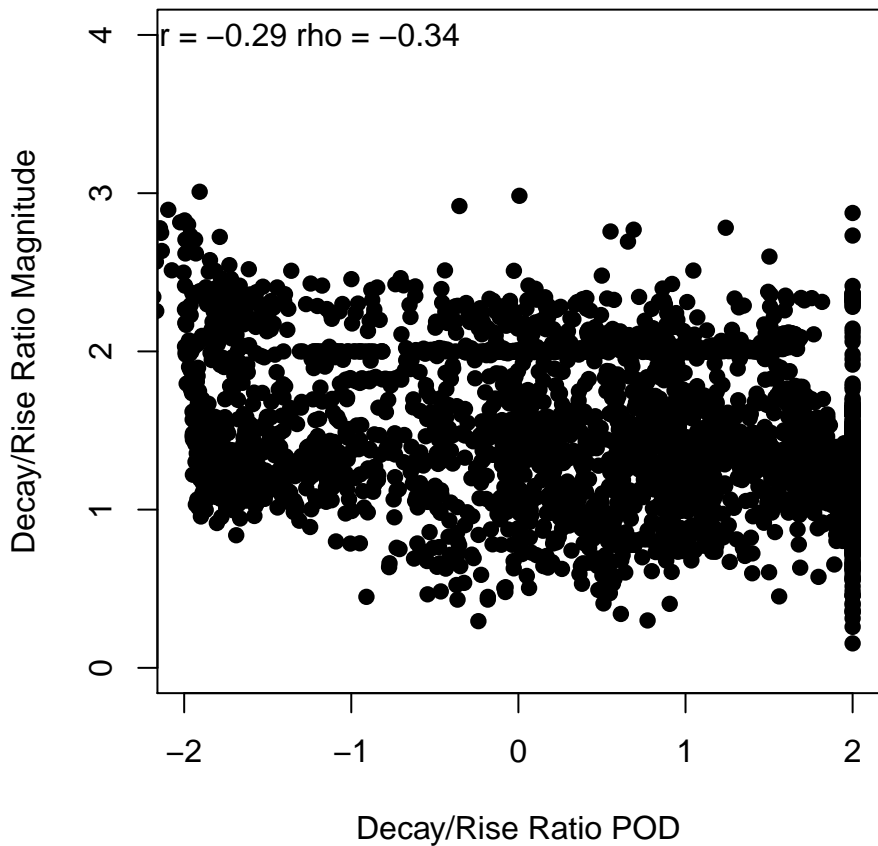

C

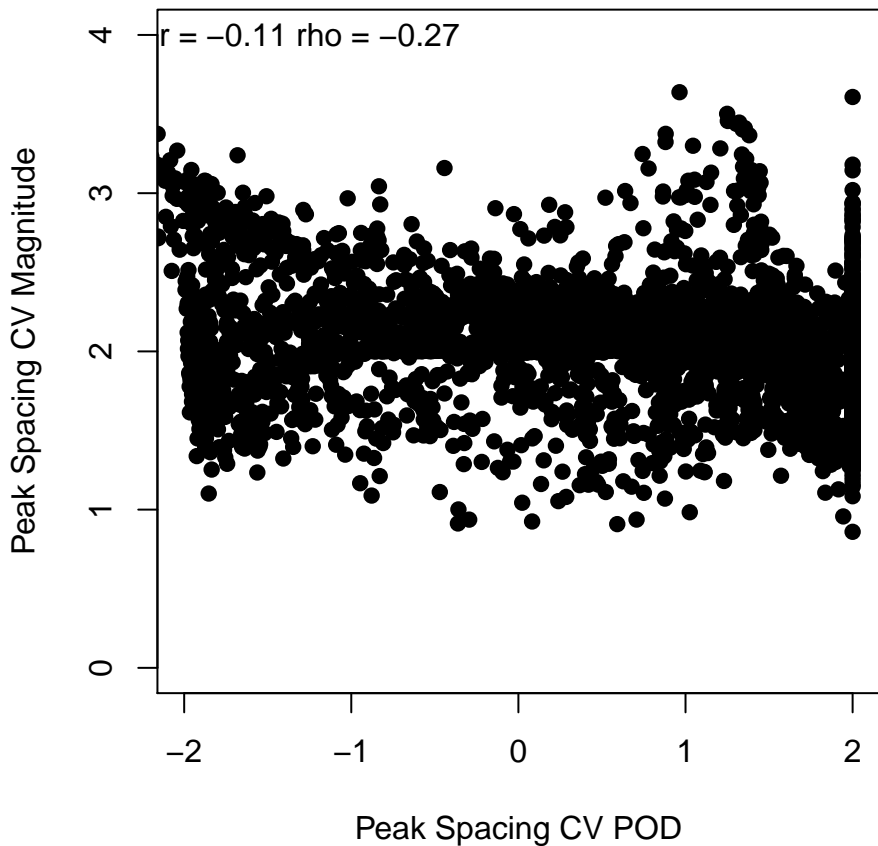

D

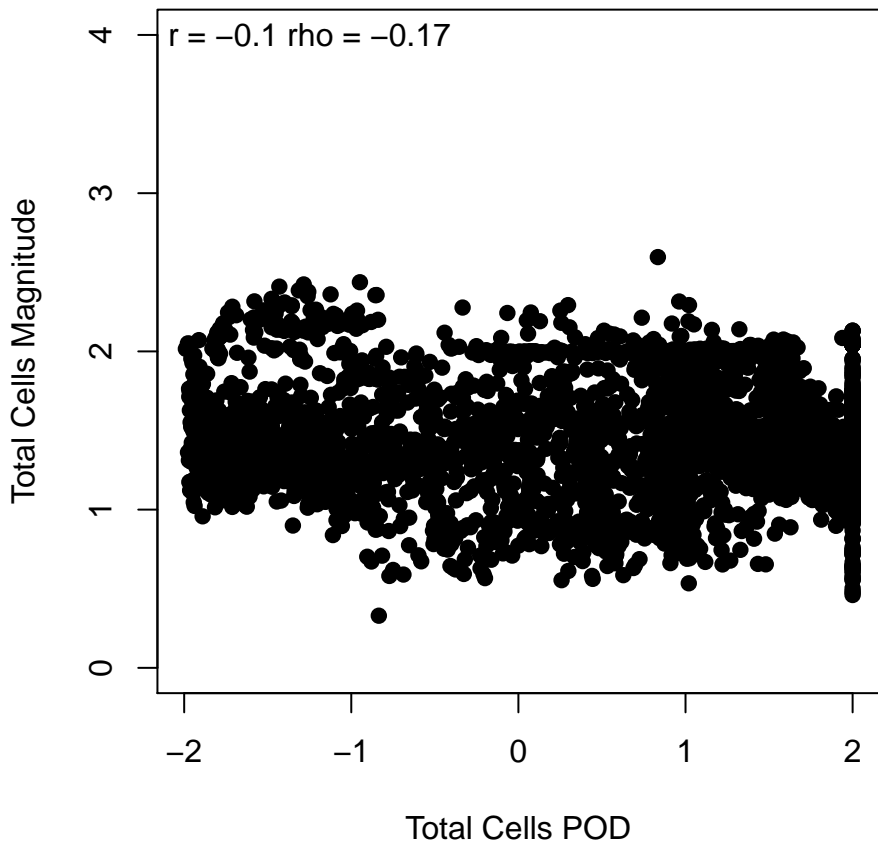

Supplement: NIHMS1538207-supplement-9.pdf [file NIHMS1538207-supplement-9.pdf]
